# Supplementary material
Source: PubMed Central journal article supplement (PMC2443785)
Supplement: NIHMS51376-supplement-Microarray_PCR.pdf [file NIHMS51376-supplement-Microarray_PCR.pdf]

Supporting Online Material for

**MeCP2, a Key Contributor to Neurological Disease, Activates and Represses  
Transcription**

Maria Chahrour, Sung Yun Jung, Chad Shaw, Xiaobo Zhou, Stephen T. C. Wong,  
Jun Qin and Huda Y. Zoghbi\*

\* To whom correspondence should be addressed. E-mail: [hzoghbi@bcm.edu](mailto:hzoghbi@bcm.edu)

Supporting Online Material includes:

Materials and Methods

Figs. S1 and S2

Tables S1 to S8

Supplementary References

## **Materials and Methods**

### **Microarray data analysis**

We used the Affymetrix Mouse Exon 1.0 ST microarray, which carries 1.2 million probe sets covering one million exon clusters, with an average of 40 probes per gene. Exon array data were processed in the R statistical programming environment using locally developed methods and the exonmap package (*SI*). Raw data were first analyzed with RMA normalization as implemented in exonmap to remove between-array effects and to standardize the low-level data. Subsequently, linear models were calculated to analyze genotype effects for each gene. An appropriate gene model was first obtained prior to performing the linear model calculation. Genomic annotations were obtained from UCSC (<http://genome.ucsc.edu>) in a bulk download using the table browser against the underlying knownGene and refFlat database tables. The probeset coordinate information available from the Affymetrix annotation file was then cross-referenced against the coordinates derived from UCSC. Each array probeset was assigned to its unique exon or intron region grouped within each gene. For genes where the Affymetrix annotation file listed exonic probes but where annotation was not available from UCSC, the corresponding probes were assigned to a single exonic group within the gene that was indicated by the Affymetrix annotation file. The normalized probe level data were then averaged within each exon to produce exon level data for each gene for each animal. A two-way ANOVA with main effects for genotype and exonic region was then calculated for each gene. The ANOVA model was fit using weighted least squares analysis where the weights were determined according to the probe counts within each exon. Since

separate wildtype (WT) littermates of different strains were used in the *Mecp2*-null (C57BL/6J) and *MECP2*-Tg (FVB) experiments, a separate linear model was estimated for each gene in each strain (one fit for each WT background). A linear contrast was calculated comparing the WT and mutant cross-exon means for each gene. The cutoff rule for determining genes regulated by MeCP2 was a log scale fold difference of 0.2 in both the *MECP2*-Tg and the *Mecp2*-null lists, or a combined fold difference of 0.4 and a consistent pattern of change for the common genes (*MECP2*-Tg-*Mecp2*-null), and a linear step up false discovery rate (FDR) (*S2*) of less than 0.05 value for the T-statistic corresponding to the linear contrast comparing each WT strain with its corresponding mutant. The gene set determined by this fold change and FDR multiplicity corrected cutoff, corresponds to a median raw marginal p-value of around 0.00015 for the underlying T-statistics. Ultimately, eight sets of genes were determined from our analysis: activated by MeCP2 (upregulated in *MECP2*-Tg, downregulated in *Mecp2*-null), repressed by MeCP2 (downregulated in *MECP2*-Tg, upregulated in *Mecp2*-null), downregulated in both mouse models, upregulated in both mouse models, only altered in *MECP2*-Tg (upregulated or downregulated), and only altered in *Mecp2*-null (upregulated or downregulated). Post-processing of our exon array based gene sets was performed to determine the content of the sets. We utilized the Gene Ontology (GO) analysis for this purpose, using locally developed software and methods. Briefly, the gene ontology vocabulary was obtained from the GO website (9/1/2007 build), and current mouse annotations were also downloaded. The mouse exon array was mapped to entrez identifiers, and these identifiers were mapped to the GO data structure using the available

annotations. Using our local ontology analysis system (OntologyTraverser), we tabulated the genes annotated at or below each GO node for the entire exon array. We then used a hypergeometric sampling model to examine the statistical representation of each GO node for genes in our gene sets. In order to make comparisons between sets, we took differences between the standardized scores determined for each gene set. Because of the extreme overlapping structure of the GO, many GO nodes report duplicate or redundant information. To avoid this problem, we calculated the GO covariance structure and used this estimate to compute de-correlated GO scores. Analysis of the de-correlated difference scores revealed substantial content differences between the repressed by MeCP2 and the activated by MeCP2 gene sets. To assess the overlap of the regulated gene sets with CpG island context, we computed the number of genes in each gene set whose transcriptional start site was within 5kb of a CpG island - in either the upstream or downstream direction. The CpG island coordinates were obtained using the UCSC mm8 annotation table cpgIslandExt, and gene coordinates were determined using the knownGene table from UCSC. For genes on the minus strand, we looked within 5kb from the appropriate end of the transcript. Statistical enrichment was determined by using a random model where approximately 34% of randomly selected mouse genes would be expected to overlap a CpG island. The p-values were determined using a normal approximation to the binomial sampling model.

### **Quantitative real-time RT-PCR**

We used only male mice for this study to avoid variability from X-chromosome

inactivation (XCI) patterns in female mice; since *Mecp2* is located on the X-chromosome, and the XCI pattern is variable in a mouse colony (S3). Total RNA was extracted from the hypothalamus of 6 weeks (wks) old male mice using TRIzol reagent (Invitrogen Corporation, Carlsbad, CA), DNaseI treated, and purified using the RNeasy mini kit according to the manufacturer's protocol (Qiagen, Valencia, CA). cDNA was synthesized from 1 µg of RNA using the RT<sup>2</sup> First Strand Kit (SuperArray Bioscience Corporation, Frederick, MD). Quantitative real-time PCR reactions were performed on 10 ng of cDNA using RT<sup>2</sup> SYBR Green/ROX PCR master mix and commercially available primers (SuperArray Bioscience Corporation, Frederick, MD). All RNA samples were analyzed in triplicate and normalized relative to Gapdh levels.

### **Sodium bisulfite sequencing**

Genomic DNA was isolated from hypothalami of three WT male mice using the Non-Organic DNA Extraction kit according to the manufacturer's protocol (Millipore Corporation, Billerica, MA). Bisulfite treatment of 1 µg of hypothalamic DNA was performed using the CpGenome<sup>TM</sup> Fast DNA Modification kit (Millipore Corporation, Billerica, MA). Bisulfite-treated DNA (1 µl) was amplified by nested PCR using primers directed against the promoter region of target genes. PCR products were cloned into the pCR2.1-TOPO vector (Invitrogen Corporation, Carlsbad, CA), and for each insert, ~10 clones were sequenced. Nested PCR conditions were as follows: 95°C for 5 minutes, 95°C for 45 seconds, 49°C for 45 seconds, 72 °C for 45 seconds (repeat from step 2 for 35 cycles), 72 °C for 7 minutes, hold at 4°C. We used 5 µl of amplicon from the first

round of PCR as the template for the second round. The following primer sequences were used to amplify promoter regions of target genes (*external* for the first round, and *internal* for the second round of the nested PCR):

*Grin2a - external*: Forward 5'-GTTTGTGAGGAGATAAAAATTTAGTA-3'

Reverse 5'-CTCTCCTCCACCTTACAAAACCCT-3'

*Grin2a - internal*: Forward 5'-ATTTTTAAATATTAAGTTATGGATG-3'

Reverse 5'-TATTACCRACCCTTCTAATCTAACA-3'

*A2bp1 - external*: Forward 5'-GTTTTGTTAGTTATAGGATTTA-3'

Reverse 5'-TAAATTCCTCAATTCTCTATATAA-3'

*A2bp1 - internal*: Forward 5'-AGTTYGTATTTGGAGGGGATAGTYG-3'

Reverse 5'-AAACAACRAATTAAAATATTA ACT-3'

*Sst - external*: Forward 5'-GGGTTGAGYGATTTTGAGAAGYGTT-3'

Reverse 5'-ATTAATTTTACRAAACTAATAATAC-3'

*Sst - internal*: Forward 5'-AGGGGGATAGTTTTTATTTGTTTTT-3'

Reverse 5'-CACTAATAAAATCTAAAAACRCCTCC-3'

*Gprin1 - external*: Forward 5'-GGGTATGYGYGTTGGGTGTATT-3'

Reverse 5'-TAAACACCTTCTTTCAAACACTTTC-3'

*Gprin1 - internal*: Forward 5'-GTTTGGTGTTTAGTTGGGAGTATYGYGGG-3'

Reverse 5'-AATAACTTATTA AAAAATATCCAAAA-3'

*Gamt - external*: Forward 5'-GGTAAGGAAATTGAGATTTGTAAT-3'

Reverse 5'-CCATCCACCCAAACCCAACCAATA-3'

*Gamt - internal*: Forward 5'-GTAGAGTATTTTTGGAGGTAGTAGT-3'

Reverse 5'-AACCCACCCTAACCCAAAAAAACCC-3'

*E2F1 - external*: Forward 5'-GTTTATATTAGAATTGGGAATTTGG-3'

Reverse 5'-CAAATCRTCATCATCTCCACC-3'

*E2F1 - internal*: Forward 5'-TTAAGTAAGTATTAGTTGGATATA-3'

Reverse 5'-CCCACTAACCCCTCRCRATTCTAAC-3'

### **Chromatin immunoprecipitation**

The hypothalamus was dissected from 6 wks old mice and incubated in 1% formaldehyde for 10 minutes at room temperature to cross-link DNA to associated proteins. The tissue was washed twice with ice-cold phosphate buffered saline (PBS) containing 0.125 M glycine and protease inhibitors (PI; complete protease inhibitor cocktail tablets, Roche Applied Science, Indianapolis, IN) and then homogenized in lysis buffer (10 mM Tris-HCl pH 7.5, 10 mM NaCl, 3 mM MgCl<sub>2</sub>, 0.5% NP40) containing PI. After 10 minutes of incubation on ice, the lysate was centrifuged for 5 minutes at 3,000 rpm and 4°C, and the nuclear pellet was sonicated with a Branson Sonifier 450 for 6 seconds at power level 6. The homogenate was then digested with 300 U of micrococcal nuclease for 5 minutes at 37°C (Worthington Biochemical Corporation, Lakewood, NJ) to generate fragments with an average length of ~100-200 bps, as determined empirically by agarose gel electrophoresis of the fragmented chromatin sample. For immunoprecipitation, 200 µl of chromatin was diluted 1:10 in ChIP dilution buffer (Millipore Corporation, Billerica, MA) and 1% of the diluted sample was set aside for input. The sample was precleared with protein A Dynabeads (Invitrogen Corporation, Carlsbad, CA) at 4°C for 3 hours.

The precleared lysate was incubated overnight with protein A Dynabeads that were pre-blocked with salmon sperm DNA, and 5  $\mu\text{g}$  of rabbit polyclonal anti-MeCP2 antibody (Millipore Corporation, Billerica, MA). Mock immunoprecipitation with 5  $\mu\text{g}$  of nonspecific rabbit immunoglobulin G (IgG) was included as a control. After immunoprecipitation, the beads were washed sequentially at room temperature (for 5 minutes each) with 700  $\mu\text{l}$  of low salt buffer, high salt buffer, LiCl buffer (Millipore Corporation, Billerica, MA), and TE buffer (10 mM Tris-HCl pH 7.4, 1 mM EDTA pH 8.0). Elution was performed twice in 250  $\mu\text{l}$  of fresh elution buffer (1% SDS, 0.1 M  $\text{NaHCO}_3$ ) for 15 minutes at room temperature. The eluates were combined, 20  $\mu\text{l}$  of 5 M NaCl was added, and samples were incubated overnight at 65°C to reverse the cross-links. The input DNA was diluted in freshly made elution buffer to a volume of 500  $\mu\text{l}$ , and cross-link reversal was performed. After cross-link reversal, samples were digested with 20  $\mu\text{g}$  of proteinase K for 1 hour at 55°C, and DNA was recovered by standard methods in 30  $\mu\text{l}$  of 10 mM Tris-HCl pH 8.0. One  $\mu\text{l}$  of DNA was used for each quantitative real-time PCR. For sequential ChIP (seqChIP) analysis, a primary ChIP was performed with 5  $\mu\text{g}$  of rabbit polyclonal anti-MeCP2 antibody (Millipore Corporation, Billerica, MA), or 5  $\mu\text{g}$  of nonspecific rabbit IgG as a control, and the immunoprecipitated complexes were eluted as described above. Half of the eluate was subjected to a second ChIP using 5  $\mu\text{g}$  of rabbit polyclonal anti-CREB1 antibody (Novus Biologicals, Littleton, CO). Promoters were analyzed by quantitative real-time PCR using 3  $\mu\text{l}$  of DNA. ChIP and seqChIP experiments were performed in triplicate, and all



quantitative real-time PCR experiments were performed in triplicate. The quantitative real-time PCR data were analyzed as follows (S4, S5). Relative proportions of immunoprecipitated DNA were determined based on the threshold cycle (Ct) value for each PCR reaction. In order to control for variation between ChIP fractions, for every gene promoter studied, a  $\Delta\text{Ct}$  value was calculated for each sample (WT, *MECP2*-Tg, *Mecp2*-null) by subtracting the Ct value for the input ( $\text{Ct}^{\text{Input}}$ ) from the Ct value for the immunoprecipitated sample ( $\text{Ct}^{\text{antibody}}$  or  $\text{Ct}^{\text{IgG}}$ ). Because the input DNA fraction represents only 1% of the total material (see above), the  $\text{Ct}^{\text{Input}}$  value was first adjusted for this dilution factor by subtracting 6.644 cycles ( $\text{Log}_2$  of 100). The formula used was:

$$\Delta\text{Ct}^{\text{antibody}} \text{ (or } \Delta\text{Ct}^{\text{IgG}}) = [\text{Ct}^{\text{antibody}} \text{ (or IgG)} - (\text{Ct}^{\text{Input}} - 6.644)].$$

Next, a  $\Delta\Delta\text{Ct}$  value (S6) was calculated for each sample by subtracting the  $\Delta\text{Ct}^{\text{IgG}}$  from the corresponding  $\Delta\text{Ct}^{\text{antibody}}$ . The formula used was:

$$\Delta\Delta\text{Ct}^{\text{WT (or } MECP2\text{-Tg or } Mecp2\text{-null)}} = \Delta\text{Ct}^{\text{antibody}} - \Delta\text{Ct}^{\text{IgG}}$$

Fold differences between the specific immunoprecipitation and the IgG background were then determined by raising 2 to the  $-\Delta\Delta\text{Ct}$  power (for example, specific binding in the WT sample =  $2^{-\Delta\Delta\text{Ct}^{\text{WT}}}$ ). Data were then plotted as fold enrichment over the *Mecp2*-null (for each WT sample:  $2^{-\Delta\Delta\text{Ct}^{\text{WT}}} - 2^{-\Delta\Delta\text{Ct}^{\text{Mecp2-null}}}$ , and for each *MECP2*-Tg sample:  $2^{-\Delta\Delta\text{Ct}^{\text{MECP2-Tg}}} - 2^{-\Delta\Delta\text{Ct}^{\text{Mecp2-null}}}$ ).

Primer and probe sequences used were as follows:

*Sst*: Forward 5'-GCGTAAAAGCACTGGTGAGATCT-3'

Reverse 5'-GGTCTCCCCTTTTAAACTCTCTCTCT-3'

Probe 6-FAM-TCCTTGGCTGACGTC-BHQ

*Oprk1*: Forward 5'-GCACCTTGCTGATCCCAAAC-3'

Reverse 5'-CCACGTTCTGATGCTCAATT-3'

Probe 6-FAM-CAGTCTTGGAAGGCA-BHQ

*Gamt*: Forward 5'-ACGGCTCAGCCACGGAG-3'

Reverse 5'-TTGCACTCAAGTGGGTGGG-3'

Probe 6-FAM-TTCTTTAGGGCGCATAG-BHQ

*Gprin1*: Forward 5'-GCCTTCAGCGGTTCACTCAA-3'

Reverse 5'-CGTCTGTAAGTATTAATCGCCTCAT-3'

Probe 6-FAM-ACTCCTAAACACCTTCT-BHQ

*Mef2c*: Forward 5'-CACTTGAGCACACGCGTACA-3'

Reverse 5'-ACCCACACAGAACCTTCAAAGTC-3'

Probe 6-FAM-CCAGACATCTTCGGG-BHQ

*A2bp1*: Forward 5'-CCGCTGCCTGTGGATGAG-3'

Reverse 5'-AAAGCCGAGAGCCAAATCAC-3'

Probe 6-FAM-TGGCTCCTGACAGAA-BHQ

*Creb1*: Forward 5'-GGCTGGCCGCAAAGC-3'

Reverse 5'-TGGTTCTTTGCTGGGAAGAAAG-3'

Probe 6-FAM-CCACATGCCACCTG-BHQ

For the custom array experiment, ChIP was performed as described above using hypothalamic chromatin from 3 WT males, 3 *MECP2*-Tg males, and 2 *Mecp2*-null males. The input (whole cell extract, WCE) DNA and immunoprecipitated (IP) DNA were

differentially labelled and hybridized to the array. The labeling and hybridization were performed using established protocols (Agilent Technologies, Santa Clara, CA). Fluorescence intensity raw data were obtained from scanned images of the array using the Feature Extraction software (Agilent Technologies, Santa Clara, CA). The pre-processing and normalization of the raw signals were carried out using the ChIP Analytics software 1.3 (Agilent Technologies, Santa Clara, CA). Data from all eight samples were subjected to blank subtraction, inter-array and intra-array median normalizations, and the replicate samples for the same genotype were combined to form a single set of output for each probe. For each of the three genotypes (WT, *MECP2*-Tg, *Mecp2*-null), the net signal for a single probe was calculated as the difference between the normalized signals of the IP and WCE channels:

$$I_m = I_m^{IP} - I_m^{WCE}, m = \{ 'WT', 'MECP2-Tg', 'Mecp2-null' \}$$

For each probe, we compared the net signal from the WT and *MECP2*-Tg conditions to that of the *Mecp2*-null condition separately, and the differences in net signals were normalized to the standard deviation of the net signals for the *Mecp2*-null (knock-out, KO) condition. Considering the context information for each probe, a weighted average signal  $I^*$  was calculated by including one neighborhood probe up- and downstream of each probe, respectively, and the weight for the center probe was set to 2 while the weight for neighboring probes was 1:

$$\tilde{I}_n = (I_n - I_{KO}) / std(I_{KO}), \quad n = \{ 'WT', 'MECP2-Tg' \}$$

where

$$std(I_{KO}) = \sqrt{\frac{1}{N-1} \sum_{t=1}^N \left[ I_{KO}(t) - \frac{1}{N} \sum_{t=1}^N I_{KO}(t) \right]^2}$$
$$I_n^*(t) = \frac{[\tilde{I}_n(t-1) + 2 * \tilde{I}_n(t) + \tilde{I}_n(t+1)]}{4}.$$

For each, the WT and *MECP2*-Tg conditions, we assumed that the weighted context signal  $I^*$  follows a Gaussian distribution with mean and standard deviation estimated from the whole vector. Thus, a p-value was calculated for each probe. At the significant level of 0.05, we picked up probes with significantly large  $I^*$  value (indicating that the signals in WT and *MECP2*-Tg conditions are significantly larger than that in the *Mecp2*-null condition), and considered them specific bound probes in WT and *MECP2*-Tg conditions.

### **Proteomic analysis of MeCP2 complex from mouse brain**

#### *Brain tissue preparation and cell harvesting*

In order to avoid contamination of protein extracts with mouse immunoglobulins, and to aid dissociation of connective tissue, we performed intracardiac perfusion with aprotinin-PBS prior to collection of mouse brain. All procedures conformed to the Baylor College of Medicine experimental animal handling guidelines. Mice were deeply anesthetized using an intraperitoneal injection of anesthetic (ketamine 37.5 mg, xylazine 1.9 mg, and acepromazine 0.37 mg, in 5 ml of sterile water) at 0.75 - 1.5 ml/kg body weight and intracardiac perfusion was performed through the left ventricle. The whole brain was dissected with the cerebellum and brainstem intact and minced into small pieces on ice to

release cells. The cells were further dispersed by aspiration through a large bore pipette and run through a cell strainer (100  $\mu\text{m}$  pore size). Isolated cells were harvested by centrifugation at 1,000 X  $g$  for 5 minutes at 4°C and washed three times with ice-cold PBS.

### *Subcellular fractionation*

Cytoplasmic fractions (S100) and nuclear extracts (NE) from collected brain cells were prepared by mechanical lysis of the cells. After measuring the packed-cell volume (PCV), the cell pellet was gently resuspended in 2.5 PCVs of lysis solution (10 mM Hepes pH 7.8, 10 mM KCl, 1.5 mM  $\text{MgCl}_2$ , 0.5% NP40, 0.34 M sucrose, 10 mM PMSF, 10 mM 2-mercaptoethanol) and homogenized with a dounce homogenizer. The lysate was centrifuged at 500 X  $g$  for 10 minutes at 4°C to separate supernatant (for S100) and packed nuclear pellet (for NE). The supernatant was removed and centrifuged at 100K X  $g$  for 20 minutes to eliminate plasma membrane contamination. For the NE, the packed nuclear pellet was lysed with 1.5 volumes of NETN buffer (25 mM Tris-HCl pH 8.0, 150 mM NaCl, 1 mM EDTA, 0.5% NP40) by sonication and cleared by centrifugation at 100K X  $g$  for 20 minutes. The cleared supernatant was removed (0.5% NP40 soluble fraction) and the pellet was then solubilized by sonication with 1 volume of RIPA buffer (50 mM Tris-HCl pH 8.0, 150 mM NaCl, 1.0% NP40, 0.5% sodium deoxycholic acid, 0.1% SDS) and cleared by 100K X  $g$  centrifugation for 1 hour (chromatin binding fraction).

### *Immunoprecipitation*

The samples were cleared by centrifugation at 100K X g for 20 minutes at 4°C. The supernatant was collected and immunoprecipitation with an anti-MeCP2 antibody was carried out as previously reported (S7). Briefly, 10 mg of supernatant was mixed with 7.5 µg of affinity-purified antibody and rotated for 4 hours at 4°C. The sample and antibody mixture was centrifuged at 100K X g for 20 minutes at 4°C. To pre-clear the samples, 15 µl of Protein A-Sepharose bead slurry (50%) was added and samples were rotated for 1 hour at 4°C. The immunoprecipitates were washed 3 times with NETN buffer (20 mM Tris-HCl pH 8.0, 100 mM NaCl, 1 mM EDTA, 0.5% NP40). The washed beads were boiled with Laemmli buffer and subjected to SDS-PAGE (4-20% Tris/Glycine NOVEX Gel, Invitrogen). The Coomassie brilliant blue-stained protein bands were excised and destained with 50 mM ammonium bicarbonate solution in 50% methanol. Gel pieces were then washed in HPLC water overnight. After the wash, gel pieces were digested with 100 ng of trypsin in 50 mM NH<sub>4</sub>HCO<sub>3</sub> pH 8.5 for 4 hours in a volume of 15 µl. After digestion, peptides were extracted by the addition of 200 µl acetonitrile. The supernatants were dried in a Speed-Vac dryer (Thermo Savant).

### *Protein identification*

#### Nano-HPLC/MS/MS analysis

Each dried sample was dissolved in 20 µl of 5% methanol/ 95% water/ 0.01% formic acid solution and injected into Surveyor HPLC system (ThermoFinnigan) using autosampler. A 100 mm x 75 µm, C18 column (5 µm, 300 Å pore diameter, PicoFrit™,

New objective) with mobile phases of A (0.1% formic acid in water) and B (0.1% formic acid in methanol) was used with a gradient of 5-95% of mobile phase B over 15 minutes followed by 95% phase B for 5 minutes at a flow rate of 200 nl/minute. Peptides were directly electrosprayed into the mass spectrometer (Finnigan LTQ™, ThermoFinnigan) using nano-spray source. LTQ were operated in the data-dependant mode acquiring fragmentation spectra of the top 20 strongest ions.

#### Protein sequence database search and manual verification

The obtained MS/MS spectra were analyzed against NCBI-ref protein sequence database using BioWorks database search engine (BioWorksBrowser ver 3.2, Thermo Electron). All peptide hits with stringent BioWorksBrowser filtering criteria - peptide probability  $> 5 \times 10^{-5}$  and Xcorr score  $> 2.5$  for 2+ ions and 4.5 for 3+ ions - were further examined manually and all peptides had to be assigned by consecutive b- or y- ions to eliminate false positives.

#### **Immunoprecipitation from cells**

Neuro2a cells were maintained in Dulbecco's modified Eagle's medium (DMEM; Invitrogen Corporation, Carlsbad, CA) containing 10% FBS. Cells in a 6-well plate were transfected with 1  $\mu\text{g}$  of a MeCP2 expression vector (pCDNA3.1-*Mecp2*) using Lipofectamine 2000 according to the manufacture's protocol (Invitrogen Corporation, Carlsbad, CA). For the immunoprecipitation one well of the 6-well plate was used. Cells were lysed in 3 volumes of lysis buffer (25 mM Tris pH 7.8, 1 mM EDTA, 150 mM

NaCl, 0.5% NP40) with sonication. The lysate was centrifuged at 4°C for 30 minutes at 100K X g. The supernatant was collected and immunoprecipitated using anti-CREB1 antibody (Abcam, Cambridge, MA) as reported above. Briefly, 1 ml of supernatant was mixed with 3 µg of antibody and rotated for 4 hours at 4°C. The sample and antibody mixture was centrifuged at 100K X g for 20 minutes at 4°C. 15 µl of Protein A-Sepharose bead slurry (50%) was added and samples were rotated for 1 hour at 4°C. The immunoprecipitates were washed 3 times with NETN buffer (20 mM Tris-HCl pH 8.0, 100 mM NaCl, 1 mM EDTA, 0.5% NP40). The washed beads were boiled in Laemmli buffer and subjected to SDS-PAGE (4-20% Tris/Glycine NOVEX Gel, Invitrogen Corporation, Carlsbad, CA). In-gel digestion and protein identification were carried out as reported above.

### **Luciferase assay**

Neuro2a cells were transfected, using Lipofectamine 2000 according to the manufacturer's protocol (Invitrogen Corporation, Carlsbad, CA), with pGL3-Basic-*Sst*-promoter or pGL3-Basic-*A2bp1*-promoter luciferase reporter constructs (50 ng each), and the pRL-TK vector (10 ng, Promega, Madison, WI) as an internal transfection control. To generate the reporter constructs, mouse genomic DNA was used as a template to amplify the promoter regions of *Sst* and *A2bp1*, with the following primers:

*Sst* - Forward: 5'-CCGCTCGAGTGGCCTCTGAGACCC-3'

Reverse: 5'-CCGCTCGAGCTTCCTTGCCTCA-3'

*A2bp1* - Forward: 5'-CCGCTCGAGAATTGGGTGAAGAAG-3'



Reverse: 5'-CCGCTCGAGGCTTTAAATGGAGGCT-3'

The fragments were cloned into the XhoI site of the pGL3-Basic luciferase reporter vector (Promega, Madison, WI). Cells were transfected with a MeCP2 expression vector (250 ng, pCDNA3.1-*Mecp2*), a CREB1 expression vector (250 ng, pCMV-SPORT6-*Creb1*, Open Biosystems, Huntsville, AL), or both (125 ng each). After 48 hours cells were lysed and subjected to a dual luciferase reporter assay (Promega, Madison, WI). Normalized luciferase activity was obtained by dividing the firefly luciferase activity (from reporter constructs) by the *Renilla* luciferase activity (from pRL-TK vector). All experiments were performed in triplicate.

### **Western blot analysis**

Protein extracts were prepared from hypothalamic tissue of three male mice from each genotype (WT, *MECP2*-Tg, *Mecp2*-null). Hypothalami were collected into 300 µl lysis buffer (10 mM Tris pH 7.5, 150 mM NaCl, 1% Triton X, 1X PI, 1X phosphatase inhibitors 1 and 2, 1 mM PMSF) and briefly homogenized with a dounce homogenizer. The lysate was passed through a 30 G syringe and left on ice for 15 minutes, then centrifuged for 15 minutes at 13,200 rpm and 4°C. The supernatant was quantified and from each sample 10 µg total protein was used for the western blot. Sample buffer (NuPAGE, Invitrogen Corporation, Carlsbad, CA) was added and the samples were boiled for 10 minutes. Western blotting was performed with anti-MeCP2 (1:1000, Millipore Corporation), anti-Sst (1:500, Santa Cruz Biotechnology), anti-CREB1 (1:500, Abcam), and anti-Gapdh (1:5000, Advanced ImmunoChemical Inc) as a loading control.

## Supplementary Figures

### A Cellular component

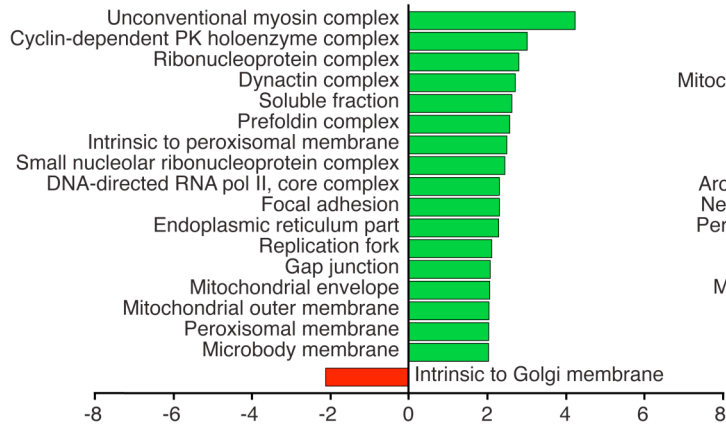

### B Biological process

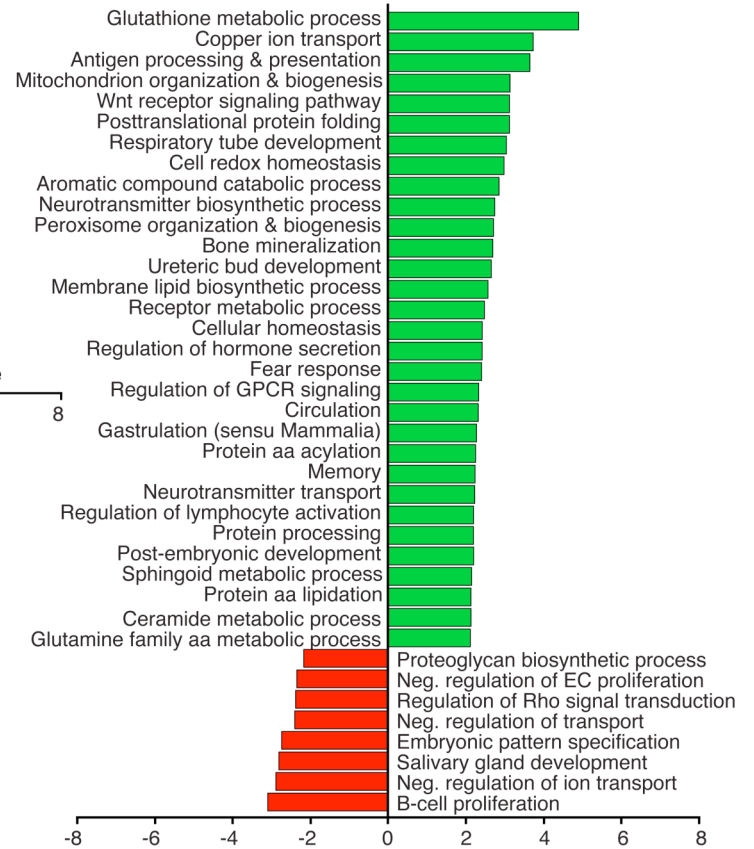

### C Molecular function

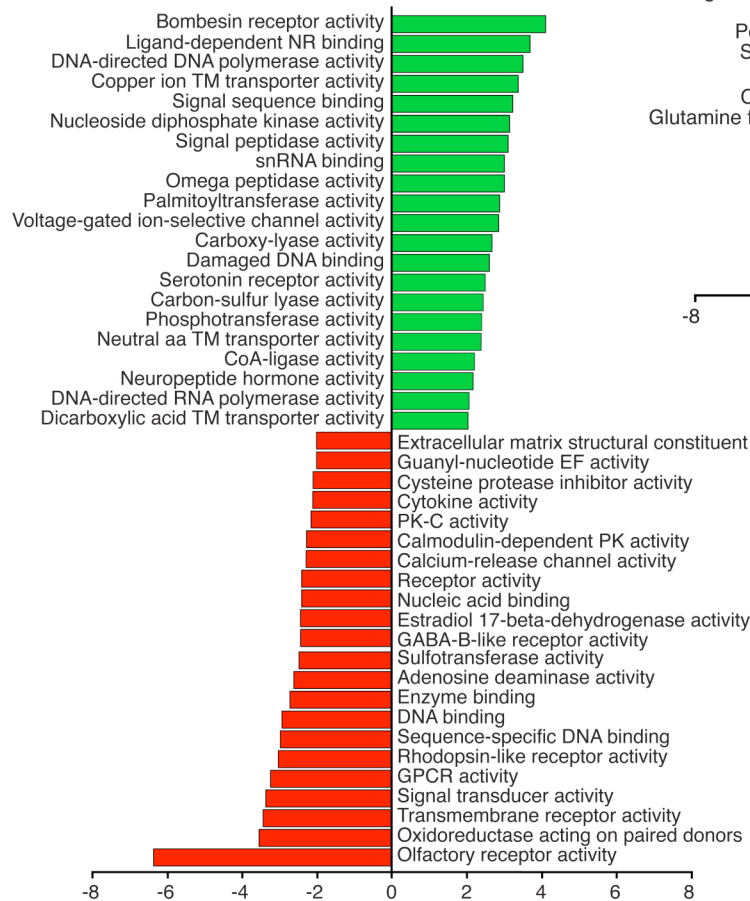

**Fig. S1.** Gene ontology analysis performed on genes that are differentially expressed in hypothalami of *MECP2*-Tg and *Mecp2*-null mice. Cellular component (**A**), biological process (**B**), and molecular function (**C**) categories that differ significantly between the genes activated by MeCP2 (green) and those repressed by MeCP2 (red) are plotted. The standardized scores (*Z* values) are presented on the X-axis, and significance was determined by a *Z* value of more than + or -2 and a count of at least two genes. PK, protein kinase, pol., polymerase, GPCR, G-protein coupled receptor, aa, amino acid, Neg., negative, EC, epithelial cell, NR, nuclear receptor, TM, transmembrane, EF, exchange factor.

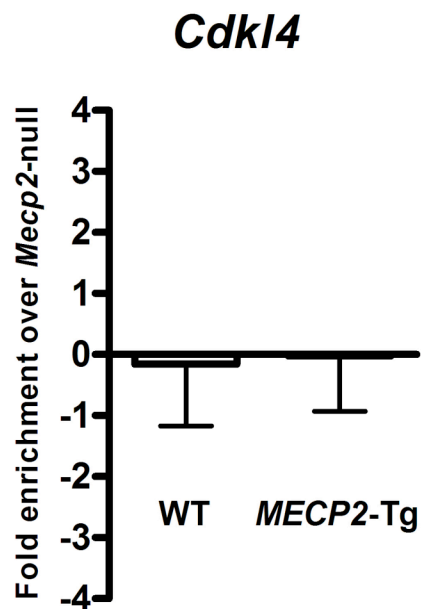

**Fig. S2.** MeCP2 binding was not detected at the promoter region of *Cdkl4*, a gene downregulated in both *MECP2*-Tg and *Mecp2*-null hypothalami. ChIP with anti-MeCP2 antibody shows that MeCP2 does not bind to the promoter region of *Cdkl4*. Quantitative real-time PCR values were normalized to the input and plotted as fold enrichment over *Mecp2*-null ( $N = 3$ ).

## Supplementary Tables

**Table S1.** The list of genes that are activated by MeCP2 (FDR-adjusted p-value < 0.05).

| <b>Gene Symbol</b> | <b>Gene Name</b>              | <b>Entrez ID</b> | <b>Fold Change<br/><i>MECP2</i>-Tg<br/>over WT</b> | <b>Fold Change<br/><i>Mecp2</i>-null<br/>over WT</b> | <b>FDR-<br/>adjusted<br/>p-value<br/>(Total)</b> | <b>FDR-<br/>adjusted<br/>p-value<br/>(<i>MECP2</i>-<br/>Tg over<br/>WT)</b> | <b>FDR-<br/>adjusted<br/>p-value<br/>(<i>Mecp2</i>-<br/>null over<br/>WT)</b> |
|--------------------|-------------------------------|------------------|----------------------------------------------------|------------------------------------------------------|--------------------------------------------------|-----------------------------------------------------------------------------|-------------------------------------------------------------------------------|
| 0610009D07Rik      | RIKEN cDNA<br>0610009D07 gene | NM_025323        | 0.293                                              | -0.301                                               | 0.0001                                           | 0.2731                                                                      | 0.0003                                                                        |
| 0610009J22Rik      | RIKEN cDNA<br>0610009J22 gene | NM_027859        | 0.346                                              | -0.221                                               | 0.0000                                           | 0.0001                                                                      | 0.0035                                                                        |
| 0610009O03Rik      | RIKEN cDNA<br>0610009O03 gene | BC064775         | 0.398                                              | -0.253                                               | 0.0000                                           | 0.0000                                                                      | 0.0000                                                                        |
| 0610010B08Rik      | RIKEN cDNA<br>0610010B08 gene | AK002444         | 0.182                                              | -0.272                                               | 0.0047                                           | 0.2089                                                                      | 0.0149                                                                        |
| 0610010F05Rik      | RIKEN cDNA<br>0610010F05 gene | BC065122         | 0.233                                              | -0.219                                               | 0.0000                                           | 0.0038                                                                      | 0.0011                                                                        |
| 0610011F06Rik      | RIKEN cDNA<br>0610011F06 gene | AK192367         | 0.125                                              | -0.362                                               | 0.0266                                           | 0.6007                                                                      | 0.0223                                                                        |
| 0610012D17Rik      | RIKEN cDNA<br>0610012D17 gene | BC053332         | 0.656                                              | -0.253                                               | 0.0125                                           | 0.1099                                                                      | 0.0800                                                                        |
| 0610016J10Rik      | RIKEN cDNA<br>0610016J10 gene | XM_980872        | 0.425                                              | -0.429                                               | 0.0018                                           | 0.1049                                                                      | 0.0127                                                                        |
| 0610031J06Rik      | RIKEN cDNA<br>0610031J06 gene | AK171142         | 0.306                                              | -0.104                                               | 0.0043                                           | 0.0317                                                                      | 0.0972                                                                        |
| 0610038D11Rik      | RIKEN cDNA<br>0610038D11 gene | BC016191         | 0.282                                              | -0.163                                               | 0.0021                                           | 0.0112                                                                      | 0.1249                                                                        |
| 0610039J04Rik      | RIKEN cDNA<br>0610039J04 gene | NM_001035123     | 0.379                                              | -0.190                                               | 0.0019                                           | 0.0066                                                                      | 0.1821                                                                        |
| 0610040D20Rik      | RIKEN cDNA<br>0610040D20 gene | AK013670         | 0.316                                              | -0.094                                               | 0.0076                                           | 0.0187                                                                      | 0.2502                                                                        |
| 0910001L09Rik      | RIKEN cDNA<br>0910001L09 gene | BC056178         | 0.361                                              | -0.241                                               | 0.0189                                           | 0.1221                                                                      | 0.1060                                                                        |
| 1110002N22Rik      | RIKEN cDNA<br>1110002N22 gene | BC094625         | 0.383                                              | -0.209                                               | 0.0114                                           | 0.0275                                                                      | 0.2583                                                                        |
| 1110004B13Rik      | RIKEN cDNA<br>1110004B13 gene | NM_025838        | 0.581                                              | -0.153                                               | 0.0212                                           | 0.0198                                                                      | 0.5147                                                                        |
| 1110008P14Rik      | RIKEN cDNA<br>1110008P14 gene | BC049639         | 0.524                                              | -0.252                                               | 0.0356                                           | 0.1027                                                                      | 0.2225                                                                        |
| 1110012D08Rik      | RIKEN cDNA<br>1110012D08 gene | AK054166         | 0.391                                              | -0.069                                               | 0.0164                                           | 0.0075                                                                      | 0.7508                                                                        |
| 1110014N23Rik      | RIKEN cDNA<br>1110014N23 gene | AK003717         | 0.451                                              | -0.170                                               | 0.0000                                           | 0.0000                                                                      | 0.0011                                                                        |
| 1110015O18Rik      | RIKEN cDNA<br>1110015O18 gene | AK003731         | 0.739                                              | -0.645                                               | 0.0475                                           | 0.1130                                                                      | 0.2638                                                                        |

**Table S1.** Continued.

| <b>Gene Symbol</b> | <b>Gene Name</b>              | <b>Entrez ID</b> | <b>Fold Change<br/><i>MECP2</i>-Tg<br/>over WT</b> | <b>Fold Change<br/><i>Mecp2</i>-null<br/>over WT</b> | <b>FDR-<br/>adjusted<br/>p-value<br/>(Total)</b> | <b>FDR-<br/>adjusted<br/>p-value<br/>(<i>MECP2</i>-<br/>Tg over<br/>WT)</b> | <b>FDR-<br/>adjusted<br/>p-value<br/>(<i>Mecp2</i>-<br/>null over<br/>WT)</b> |
|--------------------|-------------------------------|------------------|----------------------------------------------------|------------------------------------------------------|--------------------------------------------------|-----------------------------------------------------------------------------|-------------------------------------------------------------------------------|
| 1110036O03Rik      | RIKEN cDNA<br>1110036O03 gene | AK029271         | 0.267                                              | -0.246                                               | 0.0000                                           | 0.0065                                                                      | 0.0012                                                                        |
| 1110038D17Rik      | RIKEN cDNA<br>1110038D17 gene | AK034509         | 0.269                                              | -0.252                                               | 0.0000                                           | 0.0046                                                                      | 0.0050                                                                        |
| 1110039B18Rik      | RIKEN cDNA<br>1110039B18 gene | AK053521         | 0.357                                              | -0.187                                               | 0.0000                                           | 0.0000                                                                      | 0.0000                                                                        |
| 1110049F12Rik      | RIKEN cDNA<br>1110049F12 gene | NM_025411        | 0.632                                              | -0.118                                               | 0.0006                                           | 0.0020                                                                      | 0.1820                                                                        |
| 1110061N23Rik      | RIKEN cDNA<br>1110061N23 gene | NM_176834        | 0.363                                              | -0.088                                               | 0.0183                                           | 0.0255                                                                      | 0.3902                                                                        |
| 1110064P04Rik      | RIKEN cDNA<br>1110064P04 gene | NM_172391        | 0.211                                              | -0.260                                               | 0.0046                                           | 0.0672                                                                      | 0.0510                                                                        |
| 1300003B13Rik      | RIKEN cDNA<br>1300003B13 gene | AK079610         | 0.264                                              | -0.398                                               | 0.0433                                           | 0.2408                                                                      | 0.1163                                                                        |
| 1300014I06Rik      | RIKEN cDNA<br>1300014I06 gene | NM_025831        | 0.340                                              | -0.172                                               | 0.0400                                           | 0.0471                                                                      | 0.4544                                                                        |
| 1500005A01Rik      | RIKEN cDNA<br>1500005A01 gene | NM_033146        | 0.361                                              | -0.245                                               | 0.0005                                           | 0.0025                                                                      | 0.1284                                                                        |
| 1500019G21Rik      | RIKEN cDNA<br>1500019G21 gene | NM_024172        | 0.345                                              | -0.096                                               | 0.0358                                           | 0.0557                                                                      | 0.3697                                                                        |
| 1500041B16Rik      | RIKEN cDNA<br>1500041B16 gene | AK019934         | 0.347                                              | -0.174                                               | 0.0002                                           | 0.0007                                                                      | 0.1743                                                                        |
| 1500041N16Rik      | RIKEN cDNA<br>1500041N16 gene | NM_026399        | 0.332                                              | -0.087                                               | 0.0120                                           | 0.0082                                                                      | 0.5934                                                                        |
| 1600002O04Rik      | RIKEN cDNA<br>1600002O04 gene | XM_978850        | 0.333                                              | -0.338                                               | 0.0000                                           | 0.0001                                                                      | 0.0024                                                                        |
| 1700001L19Rik      | RIKEN cDNA<br>1700001L19 gene | BC049693         | 0.263                                              | -0.375                                               | 0.0117                                           | 0.2416                                                                      | 0.0315                                                                        |
| 1700007K13Rik      | RIKEN cDNA<br>1700007K13 gene | AK005731         | 0.628                                              | -0.541                                               | 0.0000                                           | 0.0010                                                                      | 0.0216                                                                        |
| 1700017B05Rik      | RIKEN cDNA<br>1700017B05 gene | AK080676         | 0.274                                              | -0.213                                               | 0.0319                                           | 0.0756                                                                      | 0.2647                                                                        |
| 1700027N10Rik      | RIKEN cDNA<br>1700027N10 gene | AK140720         | 0.259                                              | -0.288                                               | 0.0190                                           | 0.2152                                                                      | 0.0582                                                                        |
| 1700037H04Rik      | RIKEN cDNA<br>1700037H04 gene | AK048328         | 0.356                                              | -0.234                                               | 0.0005                                           | 0.0091                                                                      | 0.0436                                                                        |
| 1700040L02Rik      | RIKEN cDNA<br>1700040L02 gene | NM_028491        | 0.177                                              | -0.296                                               | 0.0077                                           | 0.2546                                                                      | 0.0196                                                                        |
| 1700041C02Rik      | RIKEN cDNA<br>1700041C02 gene | AK224940         | 0.182                                              | -0.246                                               | 0.0013                                           | 0.1107                                                                      | 0.0084                                                                        |
| 1700067C01Rik      | RIKEN cDNA<br>1700067C01 gene | AK138347         | 0.484                                              | -0.194                                               | 0.0000                                           | 0.0000                                                                      | 0.1919                                                                        |
| 1700120C14Rik      | RIKEN cDNA<br>1700120C14 gene | AK007210         | 0.559                                              | -0.521                                               | 0.0030                                           | 0.0136                                                                      | 0.1477                                                                        |

**Table S1.** Continued.

| <b>Gene Symbol</b> | <b>Gene Name</b>              | <b>Entrez ID</b> | <b>Fold Change<br/><i>MECP2</i>-Tg<br/>over WT</b> | <b>Fold Change<br/><i>Mecp2</i>-null<br/>over WT</b> | <b>FDR-<br/>adjusted<br/>p-value<br/>(Total)</b> | <b>FDR-<br/>adjusted<br/>p-value<br/>(<i>MECP2</i>-<br/>Tg over<br/>WT)</b> | <b>FDR-<br/>adjusted<br/>p-value<br/>(<i>Mecp2</i>-<br/>null over<br/>WT)</b> |
|--------------------|-------------------------------|------------------|----------------------------------------------------|------------------------------------------------------|--------------------------------------------------|-----------------------------------------------------------------------------|-------------------------------------------------------------------------------|
| 1810010H24Rik      | RIKEN cDNA<br>1810010H24 gene | AK007422         | 0.625                                              | -0.180                                               | 0.0489                                           | 0.0217                                                                      | 0.8103                                                                        |
| 1810013C15Rik      | NA                            | NM_194348        | 0.419                                              | -0.126                                               | 0.0000                                           | 0.0000                                                                      | 0.0000                                                                        |
| 1810014F10Rik      | RIKEN cDNA<br>1810014F10 gene | AK163708         | 0.249                                              | -0.356                                               | 0.0071                                           | 0.2660                                                                      | 0.0172                                                                        |
| 1810015A11Rik      | RIKEN cDNA<br>1810015A11 gene | AK076869         | 0.332                                              | -0.226                                               | 0.0053                                           | 0.0353                                                                      | 0.1069                                                                        |
| 1810020O05Rik      | NA                            | AK131825         | 0.550                                              | -0.350                                               | 0.0018                                           | 0.0054                                                                      | 0.2013                                                                        |
| 1810022K09Rik      | RIKEN cDNA<br>1810022K09 gene | XM_906582        | 0.688                                              | -0.327                                               | 0.0005                                           | 0.0169                                                                      | 0.0235                                                                        |
| 1810031K17Rik      | RIKEN cDNA<br>1810031K17 gene | AK080437         | 0.561                                              | -0.011                                               | 0.0000                                           | 0.0000                                                                      | 0.9661                                                                        |
| 1810035L17Rik      | RIKEN cDNA<br>1810035L17 gene | BC048513         | 0.621                                              | -0.147                                               | 0.0006                                           | 0.0005                                                                      | 0.4910                                                                        |
| 1810046J19Rik      | RIKEN cDNA<br>1810046J19 gene | NM_025559        | 0.494                                              | -0.403                                               | 0.0004                                           | 0.0854                                                                      | 0.0039                                                                        |
| 1810059G22Rik      | RIKEN cDNA<br>1810059G22 gene | NM_026325        | 0.337                                              | -0.264                                               | 0.0000                                           | 0.0016                                                                      | 0.0191                                                                        |
| 2010007H12Rik      | RIKEN cDNA<br>2010007H12 gene | NM_027242        | 0.386                                              | -0.076                                               | 0.0124                                           | 0.0053                                                                      | 0.7653                                                                        |
| 2010012C16Rik      | RIKEN cDNA<br>2010012C16 gene | NM_025564        | 0.452                                              | -0.239                                               | 0.0205                                           | 0.0306                                                                      | 0.3751                                                                        |
| 2010106G01Rik      | RIKEN cDNA<br>2010106G01 gene | AK155011         | 0.318                                              | -0.101                                               | 0.0005                                           | 0.0033                                                                      | 0.1135                                                                        |
| 2010204K13Rik      | RIKEN cDNA<br>2010204K13 gene | AK077356         | 0.286                                              | -0.354                                               | 0.0391                                           | 0.4827                                                                      | 0.0451                                                                        |
| 2010310D06Rik      | RIKEN cDNA<br>2010310D06 gene | NM_172541        | 0.377                                              | -0.140                                               | 0.0055                                           | 0.0123                                                                      | 0.2645                                                                        |
| 2200002K05Rik      | RIKEN cDNA<br>2200002K05 gene | NM_026955        | 0.136                                              | -0.452                                               | 0.0024                                           | 0.4906                                                                      | 0.0024                                                                        |
| 2210408I21Rik      | RIKEN cDNA<br>2210408I21 gene | XM_889461        | 0.391                                              | -0.112                                               | 0.0116                                           | 0.0062                                                                      | 0.6811                                                                        |
| 2310003H01Rik      | RIKEN cDNA<br>2310003H01 gene | AK165631         | 0.334                                              | -0.067                                               | 0.0329                                           | 0.0297                                                                      | 0.5367                                                                        |
| 2310004I24Rik      | RIKEN cDNA<br>2310004I24 gene | NM_025510        | 0.252                                              | -0.298                                               | 0.0079                                           | 0.2754                                                                      | 0.0183                                                                        |
| 2310005E10Rik      | RIKEN cDNA<br>2310005E10 gene | BC026843         | 0.186                                              | -0.330                                               | 0.0001                                           | 0.1844                                                                      | 0.0005                                                                        |
| 2310008M10Rik      | RIKEN cDNA<br>2310008M10 gene | AK032969         | 0.425                                              | -0.149                                               | 0.0005                                           | 0.0021                                                                      | 0.1584                                                                        |
| 2310014H01Rik      | RIKEN cDNA<br>2310014H01 gene | XM_001003622     | 0.525                                              | -0.132                                               | 0.0122                                           | 0.0181                                                                      | 0.3699                                                                        |
| 2310015A05Rik      | RIKEN cDNA<br>2310015A05 gene | XM_984819        | 0.440                                              | -0.187                                               | 0.0490                                           | 0.0677                                                                      | 0.4074                                                                        |

**Table S1.** Continued.

| <b>Gene Symbol</b> | <b>Gene Name</b>              | <b>Entrez ID</b> | <b>Fold Change<br/><i>MECP2</i>-Tg<br/>over WT</b> | <b>Fold Change<br/><i>Mecp2</i>-null<br/>over WT</b> | <b>FDR-<br/>adjusted<br/>p-value<br/>(Total)</b> | <b>FDR-<br/>adjusted<br/>p-value<br/>(<i>MECP2</i>-<br/>Tg over<br/>WT)</b> | <b>FDR-<br/>adjusted<br/>p-value<br/>(<i>Mecp2</i>-<br/>null over<br/>WT)</b> |
|--------------------|-------------------------------|------------------|----------------------------------------------------|------------------------------------------------------|--------------------------------------------------|-----------------------------------------------------------------------------|-------------------------------------------------------------------------------|
| 2310016C16Rik      | RIKEN cDNA<br>2310016C16 gene | NM_027127        | 0.447                                              | -0.296                                               | 0.0058                                           | 0.1050                                                                      | 0.0406                                                                        |
| 2310022K01Rik      | RIKEN cDNA<br>2310022K01 gene | AK129228         | 0.344                                              | -0.103                                               | 0.0113                                           | 0.0066                                                                      | 0.6489                                                                        |
| 2310022M17Rik      | RIKEN cDNA<br>2310022M17 gene | AK009485         | 0.348                                              | -0.109                                               | 0.0119                                           | 0.0114                                                                      | 0.4862                                                                        |
| 2310030N02Rik      | RIKEN cDNA<br>2310030N02 gene | XM_131300        | 0.296                                              | -0.182                                               | 0.0217                                           | 0.1002                                                                      | 0.1466                                                                        |
| 2310033P09Rik      | RIKEN cDNA<br>2310033P09 gene | NM_024210        | 0.380                                              | -0.216                                               | 0.0008                                           | 0.0613                                                                      | 0.0106                                                                        |
| 2310035K24Rik      | RIKEN cDNA<br>2310035K24 gene | AK002807         | 0.247                                              | -0.282                                               | 0.0137                                           | 0.2557                                                                      | 0.0349                                                                        |
| 2310038H17Rik      | RIKEN cDNA<br>2310038H17 gene | NM_025964        | 0.442                                              | -0.175                                               | 0.0206                                           | 0.0285                                                                      | 0.3946                                                                        |
| 2310042G06Rik      | RIKEN cDNA<br>2310042G06 gene | NM_025531        | 0.329                                              | -0.161                                               | 0.0000                                           | 0.0005                                                                      | 0.0464                                                                        |
| 2310043J07Rik      | RIKEN cDNA<br>2310043J07 gene | XM_977360        | 0.372                                              | -0.160                                               | 0.0155                                           | 0.0613                                                                      | 0.1695                                                                        |
| 2310056P07Rik      | RIKEN cDNA<br>2310056P07 gene | NM_027342        | 0.572                                              | -0.061                                               | 0.0013                                           | 0.0006                                                                      | 0.6963                                                                        |
| 2410008K03Rik      | RIKEN cDNA<br>2410008K03 gene | NM_028022        | 0.210                                              | -0.254                                               | 0.0008                                           | 0.0971                                                                      | 0.0063                                                                        |
| 2410012H22Rik      | RIKEN cDNA<br>2410012H22 gene | XM_990283        | 0.448                                              | -0.159                                               | 0.0134                                           | 0.0293                                                                      | 0.2803                                                                        |
| 2410018G20Rik      | RIKEN cDNA<br>2410018G20 gene | AK011255         | 0.329                                              | -0.345                                               | 0.0010                                           | 0.0289                                                                      | 0.0268                                                                        |
| 2510048L02Rik      | RIKEN cDNA<br>2510048L02 gene | AK016073         | 0.358                                              | -0.297                                               | 0.0005                                           | 0.0113                                                                      | 0.0351                                                                        |
| 2610002F03Rik      | RIKEN cDNA<br>2610002F03 gene | BC046478         | 0.424                                              | -0.168                                               | 0.0464                                           | 0.1301                                                                      | 0.2271                                                                        |
| 2610002M06Rik      | RIKEN cDNA<br>2610002M06 gene | NM_025921        | 0.360                                              | -0.371                                               | 0.0002                                           | 0.0261                                                                      | 0.0059                                                                        |
| 2610024G14Rik      | RIKEN cDNA<br>2610024G14 gene | AK163935         | 0.370                                              | -0.089                                               | 0.0132                                           | 0.0075                                                                      | 0.6609                                                                        |
| 2610036F08Rik      | RIKEN cDNA<br>2610036F08 gene | XM_984127        | 1.691                                              | -0.333                                               | 0.0163                                           | 0.0061                                                                      | 0.8218                                                                        |
| 2610042L04Rik      | NA                            | AK036843         | 0.424                                              | -0.681                                               | 0.0092                                           | 0.0892                                                                      | 0.0739                                                                        |
| 2610209M04Rik      | RIKEN cDNA<br>2610209M04 gene | AK045231         | 0.220                                              | -0.259                                               | 0.0111                                           | 0.5377                                                                      | 0.0103                                                                        |
| 2610301B20Rik      | RIKEN cDNA<br>2610301B20 gene | NM_026005        | 0.300                                              | -0.161                                               | 0.0128                                           | 0.0768                                                                      | 0.1169                                                                        |
| 2610318N02Rik      | RIKEN cDNA<br>2610318N02 gene | XM_913604        | 0.305                                              | -0.309                                               | 0.0177                                           | 0.1899                                                                      | 0.0621                                                                        |



**Table S1.** Continued.

| <b>Gene Symbol</b> | <b>Gene Name</b>              | <b>Entrez ID</b> | <b>Fold Change<br/><i>MECP2</i>-Tg<br/>over WT</b> | <b>Fold Change<br/><i>Mecp2</i>-null<br/>over WT</b> | <b>FDR-<br/>adjusted<br/>p-value<br/>(Total)</b> | <b>FDR-<br/>adjusted<br/>p-value<br/>(<i>MECP2</i>-<br/>Tg over<br/>WT)</b> | <b>FDR-<br/>adjusted<br/>p-value<br/>(<i>Mecp2</i>-<br/>null over<br/>WT)</b> |
|--------------------|-------------------------------|------------------|----------------------------------------------------|------------------------------------------------------|--------------------------------------------------|-----------------------------------------------------------------------------|-------------------------------------------------------------------------------|
| 2610524G07Rik      | RIKEN cDNA<br>2610524G07 gene | NM_025596        | 0.395                                              | -0.136                                               | 0.0000                                           | 0.0005                                                                      | 0.0310                                                                        |
| 2700007P21Rik      | RIKEN cDNA<br>2700007P21 gene | NM_001025102     | 0.323                                              | -0.185                                               | 0.0112                                           | 0.0301                                                                      | 0.2349                                                                        |
| 2700019D07Rik      | RIKEN cDNA<br>2700019D07 gene | AK077304         | 0.316                                              | -0.200                                               | 0.0019                                           | 0.0061                                                                      | 0.1953                                                                        |
| 2700055K07Rik      | RIKEN cDNA<br>2700055K07 gene | NM_026481        | 0.639                                              | -0.482                                               | 0.0000                                           | 0.0010                                                                      | 0.0043                                                                        |
| 2700060E02Rik      | RIKEN cDNA<br>2700060E02 gene | XR_003485        | 0.418                                              | -0.144                                               | 0.0001                                           | 0.0002                                                                      | 0.2045                                                                        |
| 2700069I18Rik      | NA                            | AK012506         | 0.342                                              | -0.122                                               | 0.0399                                           | 0.0687                                                                      | 0.3438                                                                        |
| 2700078K21Rik      | RIKEN cDNA<br>2700078K21 gene | NM_008748        | 0.468                                              | -0.085                                               | 0.0423                                           | 0.0521                                                                      | 0.4419                                                                        |
| 2700081O15Rik      | RIKEN cDNA<br>2700081O15 gene | BC059063         | 0.407                                              | -0.108                                               | 0.0090                                           | 0.0054                                                                      | 0.6340                                                                        |
| 2700097O09Rik      | RIKEN cDNA<br>2700097O09 gene | NM_028314        | 0.336                                              | -0.214                                               | 0.0038                                           | 0.0082                                                                      | 0.2609                                                                        |
| 2810012G03Rik      | RIKEN cDNA<br>2810012G03 gene | NM_175104        | 0.334                                              | -0.102                                               | 0.0480                                           | 0.0502                                                                      | 0.4976                                                                        |
| 2810021G02Rik      | RIKEN cDNA<br>2810021G02 gene | AK009295         | 0.053                                              | -0.722                                               | 0.0256                                           | 0.9539                                                                      | 0.0093                                                                        |
| 2810405K02Rik      | RIKEN cDNA<br>2810405K02 gene | AK012999         | 0.328                                              | -0.270                                               | 0.0002                                           | 0.1103                                                                      | 0.0012                                                                        |
| 2810406K13Rik      | RIKEN cDNA<br>2810406K13 gene | XM_905932        | 0.477                                              | -0.037                                               | 0.0007                                           | 0.0002                                                                      | 0.8262                                                                        |
| 2810409C01Rik      | RIKEN cDNA<br>2810409C01 gene | AK013051         | 0.744                                              | -0.602                                               | 0.0327                                           | 0.0300                                                                      | 0.5307                                                                        |
| 2810410M20Rik      | RIKEN cDNA<br>2810410M20 gene | XM_980210        | 0.323                                              | -0.274                                               | 0.0103                                           | 0.0691                                                                      | 0.1059                                                                        |
| 2810474O19Rik      | RIKEN cDNA<br>2810474O19 gene | BC038922         | 0.315                                              | -0.227                                               | 0.0248                                           | 0.1681                                                                      | 0.0995                                                                        |
| 2900024O10Rik      | RIKEN cDNA<br>2900024O10 gene | NM_028372        | 0.428                                              | -0.234                                               | 0.0018                                           | 0.0122                                                                      | 0.1026                                                                        |
| 2900052N01Rik      | RIKEN cDNA<br>2900052N01 gene | AK049847         | 0.269                                              | -0.684                                               | 0.0214                                           | 0.5997                                                                      | 0.0177                                                                        |
| 2900093B09Rik      | RIKEN cDNA<br>2900093B09 gene | XM_001001044     | 0.507                                              | -0.298                                               | 0.0002                                           | 0.0019                                                                      | 0.0746                                                                        |
| 3110057O12Rik      | RIKEN cDNA<br>3110057O12 gene | BC011312         | 0.212                                              | -0.311                                               | 0.0000                                           | 0.0979                                                                      | 0.0001                                                                        |
| 3300001M20Rik      | RIKEN cDNA<br>3300001M20 gene | BC049083         | 0.209                                              | -0.194                                               | 0.0003                                           | 0.0391                                                                      | 0.0071                                                                        |
| 3300002P09Rik      | RIKEN cDNA<br>3300002P09 gene | AK014377         | 0.396                                              | -0.321                                               | 0.0453                                           | 0.0513                                                                      | 0.4708                                                                        |

**Table S1.** Continued.

| <b>Gene Symbol</b> | <b>Gene Name</b>              | <b>Entrez ID</b> | <b>Fold Change<br/><i>MECP2</i>-Tg<br/>over WT</b> | <b>Fold Change<br/><i>Mecp2</i>-null<br/>over WT</b> | <b>FDR-<br/>adjusted<br/>p-value<br/>(Total)</b> | <b>FDR-<br/>adjusted<br/>p-value<br/>(<i>MECP2</i>-<br/>Tg over<br/>WT)</b> | <b>FDR-<br/>adjusted<br/>p-value<br/>(<i>Mecp2</i>-<br/>null over<br/>WT)</b> |
|--------------------|-------------------------------|------------------|----------------------------------------------------|------------------------------------------------------|--------------------------------------------------|-----------------------------------------------------------------------------|-------------------------------------------------------------------------------|
| 3632451O06Rik      | RIKEN cDNA<br>3632451O06 gene | BC023359         | 0.202                                              | -0.326                                               | 0.0000                                           | 0.0664                                                                      | 0.0001                                                                        |
| 3830408C21Rik      | RIKEN cDNA<br>3830408C21 gene | AK052571         | 0.533                                              | -0.150                                               | 0.0362                                           | 0.0275                                                                      | 0.5972                                                                        |
| 4631403P03Rik      | RIKEN cDNA<br>4631403P03 gene | NM_153793        | 0.234                                              | -0.242                                               | 0.0000                                           | 0.0010                                                                      | 0.0006                                                                        |
| 4632404H22Rik      | RIKEN cDNA<br>4632404H22 gene | AK036417         | 0.262                                              | -0.216                                               | 0.0264                                           | 0.1075                                                                      | 0.1634                                                                        |
| 4632428N05Rik      | RIKEN cDNA<br>4632428N05 gene | NM_028732        | 0.308                                              | -0.242                                               | 0.0010                                           | 0.0832                                                                      | 0.0090                                                                        |
| 4733401H18Rik      | RIKEN cDNA<br>4733401H18 gene | AK014634         | 0.448                                              | -0.206                                               | 0.0001                                           | 0.0018                                                                      | 0.0562                                                                        |
| 4833409A17Rik      | RIKEN cDNA<br>4833409A17 gene | AK154994         | 0.427                                              | -0.172                                               | 0.0001                                           | 0.0001                                                                      | 0.2634                                                                        |
| 4833442J19Rik      | RIKEN cDNA<br>4833442J19 gene | AK132096         | 0.593                                              | -0.581                                               | 0.0000                                           | 0.0068                                                                      | 0.0033                                                                        |
| 4921507P07Rik      | RIKEN cDNA<br>4921507P07 gene | NM_027564        | 0.229                                              | -0.454                                               | 0.0002                                           | 0.2892                                                                      | 0.0004                                                                        |
| 4930423K06Rik      | NA                            | AK086441         | 0.627                                              | -0.451                                               | 0.0262                                           | 0.0522                                                                      | 0.3070                                                                        |
| 4930431L04Rik      | RIKEN cDNA<br>4930431L04 gene | AK015274         | 0.388                                              | -0.414                                               | 0.0000                                           | 0.0045                                                                      | 0.0062                                                                        |
| 4930562D19Rik      | NA                            | NM_177616        | 0.418                                              | -0.222                                               | 0.0000                                           | 0.0000                                                                      | 0.0070                                                                        |
| 4931403E03Rik      | NA                            | XM_144060        | 0.305                                              | -0.313                                               | 0.0128                                           | 0.0836                                                                      | 0.1088                                                                        |
| 4931406I20Rik      | RIKEN cDNA<br>4931406I20 gene | AK172415         | 0.400                                              | -0.084                                               | 0.0000                                           | 0.0000                                                                      | 0.1680                                                                        |
| 4931428F04Rik      | RIKEN cDNA<br>4931428F04 gene | AK016481         | 0.249                                              | -0.166                                               | 0.0187                                           | 0.1030                                                                      | 0.1242                                                                        |
| 4931433A01Rik      | RIKEN cDNA<br>4931433A01 gene | NM_030231        | 0.093                                              | -0.406                                               | 0.0000                                           | 0.3316                                                                      | 0.0000                                                                        |
| 4932417I16Rik      | RIKEN cDNA<br>4932417I16 gene | NM_001033321     | 0.261                                              | -0.226                                               | 0.0017                                           | 0.0204                                                                      | 0.0635                                                                        |
| 4932418E24Rik      | RIKEN cDNA<br>4932418E24 gene | XM_923021        | 0.288                                              | -0.307                                               | 0.0063                                           | 0.0832                                                                      | 0.0554                                                                        |
| 4933406E20Rik      | RIKEN cDNA<br>4933406E20 gene | AK161992         | 0.395                                              | -0.191                                               | 0.0000                                           | 0.0000                                                                      | 0.0007                                                                        |
| 4933427D14Rik      | RIKEN cDNA<br>4933427D14 gene | AK041396         | 0.269                                              | -0.157                                               | 0.0002                                           | 0.0013                                                                      | 0.1171                                                                        |
| 4933434I06Rik      | RIKEN cDNA<br>4933434I06 gene | XM_911600        | 0.317                                              | -0.329                                               | 0.0193                                           | 0.2397                                                                      | 0.0523                                                                        |
| 5033414D02Rik      | RIKEN cDNA<br>5033414D02 gene | AK003543         | 0.552                                              | -0.124                                               | 0.0055                                           | 0.0034                                                                      | 0.6052                                                                        |
| 5033417F24Rik      | RIKEN cDNA<br>5033417F24 gene | AK018199         | 0.490                                              | -0.271                                               | 0.0205                                           | 0.0714                                                                      | 0.1892                                                                        |

**Table S1.** Continued.

| <b>Gene Symbol</b> | <b>Gene Name</b>              | <b>Entrez ID</b> | <b>Fold Change<br/><i>MECP2</i>-Tg<br/>over WT</b> | <b>Fold Change<br/><i>Mecp2</i>-null<br/>over WT</b> | <b>FDR-<br/>adjusted<br/>p-value<br/>(Total)</b> | <b>FDR-<br/>adjusted<br/>p-value<br/>(<i>MECP2</i>-<br/>Tg over<br/>WT)</b> | <b>FDR-<br/>adjusted<br/>p-value<br/>(<i>Mecp2</i>-<br/>null over<br/>WT)</b> |
|--------------------|-------------------------------|------------------|----------------------------------------------------|------------------------------------------------------|--------------------------------------------------|-----------------------------------------------------------------------------|-------------------------------------------------------------------------------|
| 5133400G04Rik      | RIKEN cDNA<br>5133400G04 gene | AK012241         | 0.436                                              | -0.208                                               | 0.0032                                           | 0.0116                                                                      | 0.1756                                                                        |
| 5530401N12Rik      | RIKEN cDNA<br>5530401N12 gene | AK017439         | 0.615                                              | -0.002                                               | 0.0214                                           | 0.0052                                                                      | 0.9967                                                                        |
| 5730494M16Rik      | RIKEN cDNA<br>5730494M16 gene | BC060253         | 0.235                                              | -0.169                                               | 0.0000                                           | 0.0008                                                                      | 0.0103                                                                        |
| 5730536A07Rik      | RIKEN cDNA<br>5730536A07 gene | AK179061         | 0.490                                              | -0.073                                               | 0.0014                                           | 0.0006                                                                      | 0.7349                                                                        |
| 5930412G12Rik      | RIKEN cDNA<br>5930412G12 gene | AK081926         | 0.421                                              | -0.251                                               | 0.0016                                           | 0.0683                                                                      | 0.0177                                                                        |
| 6230416J20Rik      | RIKEN cDNA<br>6230416J20 gene | AK040101         | 0.201                                              | -0.315                                               | 0.0002                                           | 0.1463                                                                      | 0.0010                                                                        |
| 6330403K07Rik      | RIKEN cDNA<br>6330403K07 gene | BC069976         | 0.123                                              | -0.298                                               | 0.0103                                           | 0.7209                                                                      | 0.0060                                                                        |
| 6330404F12Rik      | RIKEN cDNA<br>6330404F12 gene | AK161857         | 0.259                                              | -0.492                                               | 0.0277                                           | 0.1503                                                                      | 0.1232                                                                        |
| 6330406I15Rik      | RIKEN cDNA<br>6330406I15 gene | AB055406         | 0.273                                              | -0.228                                               | 0.0073                                           | 0.0468                                                                      | 0.1131                                                                        |
| 6330407J23Rik      | RIKEN cDNA<br>6330407J23 gene | NM_026138        | 0.289                                              | -0.128                                               | 0.0001                                           | 0.0006                                                                      | 0.1128                                                                        |
| 6330416L07Rik      | RIKEN cDNA<br>6330416L07 gene | AK048043         | 0.286                                              | -0.171                                               | 0.0002                                           | 0.0039                                                                      | 0.0452                                                                        |
| 6330503C03Rik      | RIKEN cDNA<br>6330503C03 gene | AK018206         | 0.535                                              | -0.301                                               | 0.0000                                           | 0.0000                                                                      | 0.0029                                                                        |
| 6330569M22Rik      | RIKEN cDNA<br>6330569M22 gene | AK185112         | 0.235                                              | -0.177                                               | 0.0000                                           | 0.0000                                                                      | 0.0000                                                                        |
| 6430503K07Rik      | NA                            | XM_992712        | 0.319                                              | -0.219                                               | 0.0063                                           | 0.0063                                                                      | 0.4631                                                                        |
| 6430514M23Rik      | RIKEN cDNA<br>6430514M23 gene | AK134916         | 0.843                                              | -0.742                                               | 0.0009                                           | 0.0082                                                                      | 0.0805                                                                        |
| 6430527G18Rik      | RIKEN cDNA<br>6430527G18 gene | XM_977351        | 0.643                                              | -0.306                                               | 0.0047                                           | 0.0658                                                                      | 0.0525                                                                        |
| 6530401C20Rik      | RIKEN cDNA<br>6530401C20 gene | NM_173405        | 0.183                                              | -0.316                                               | 0.0000                                           | 0.0558                                                                      | 0.0002                                                                        |
| 6720458F09Rik      | RIKEN cDNA<br>6720458F09 gene | XM_983239        | 0.486                                              | -0.120                                               | 0.0120                                           | 0.0090                                                                      | 0.5624                                                                        |
| 6720467C03Rik      | RIKEN cDNA<br>6720467C03 gene | AK214863         | 0.308                                              | -0.207                                               | 0.0003                                           | 0.0887                                                                      | 0.0027                                                                        |
| 6720489N17Rik      | RIKEN cDNA<br>6720489N17 gene | XM_904454        | 1.171                                              | -0.618                                               | 0.0302                                           | 0.0585                                                                      | 0.3125                                                                        |
| 7630402I04Rik      | NA                            | AK020189         | 0.332                                              | -0.437                                               | 0.0426                                           | 0.4744                                                                      | 0.0506                                                                        |
| 9030607L17Rik      | RIKEN cDNA<br>9030607L17 gene | BC057953         | 0.296                                              | -0.209                                               | 0.0047                                           | 0.0819                                                                      | 0.0424                                                                        |
| 9030625N01Rik      | NA                            | AK035942         | 0.327                                              | -0.402                                               | 0.0134                                           | 0.0619                                                                      | 0.1484                                                                        |

**Table S1.** Continued.

| <b>Gene Symbol</b> | <b>Gene Name</b>              | <b>Entrez ID</b> | <b>Fold Change<br/><i>MECP2</i>-Tg<br/>over WT</b> | <b>Fold Change<br/><i>Mecp2</i>-null<br/>over WT</b> | <b>FDR-<br/>adjusted<br/>p-value<br/>(Total)</b> | <b>FDR-<br/>adjusted<br/>p-value<br/>(<i>MECP2</i>-<br/>Tg over<br/>WT)</b> | <b>FDR-<br/>adjusted<br/>p-value<br/>(<i>Mecp2</i>-<br/>null over<br/>WT)</b> |
|--------------------|-------------------------------|------------------|----------------------------------------------------|------------------------------------------------------|--------------------------------------------------|-----------------------------------------------------------------------------|-------------------------------------------------------------------------------|
| 9130005N14Rik      | RIKEN cDNA<br>9130005N14 gene | NM_026667        | 0.433                                              | -0.303                                               | 0.0000                                           | 0.0009                                                                      | 0.0402                                                                        |
| 9130401M01Rik      | RIKEN cDNA<br>9130401M01 gene | BC039940         | 0.528                                              | -0.051                                               | 0.0311                                           | 0.0153                                                                      | 0.7488                                                                        |
| 9230110C19Rik      | RIKEN cDNA<br>9230110C19 gene | NM_009534        | 0.348                                              | -0.297                                               | 0.0008                                           | 0.0069                                                                      | 0.0845                                                                        |
| 9330132E09Rik      | RIKEN cDNA<br>9330132E09 gene | XM_892762        | 0.561                                              | -0.411                                               | 0.0000                                           | 0.0013                                                                      | 0.0025                                                                        |
| 9330184L24Rik      | RIKEN cDNA<br>9330184L24 gene | AK034378         | 0.964                                              | -0.221                                               | 0.0234                                           | 0.0104                                                                      | 0.7721                                                                        |
| 9430016H08Rik      | RIKEN cDNA<br>9430016H08 gene | XM_283579        | 0.418                                              | -0.180                                               | 0.0025                                           | 0.0089                                                                      | 0.1738                                                                        |
| 9430023L20Rik      | RIKEN cDNA<br>9430023L20 gene | NM_026566        | 0.358                                              | -0.056                                               | 0.0025                                           | 0.0010                                                                      | 0.7404                                                                        |
| 9430057O19Rik      | RIKEN cDNA<br>9430057O19 gene | AK034894         | 0.232                                              | -0.287                                               | 0.0000                                           | 0.0012                                                                      | 0.0000                                                                        |
| 9530023I19Rik      | RIKEN cDNA<br>9530023I19 gene | AK020568         | 0.399                                              | -0.511                                               | 0.0160                                           | 0.1301                                                                      | 0.0848                                                                        |
| 9530057J20Rik      | RIKEN cDNA<br>9530057J20 gene | AK020613         | 1.154                                              | -0.214                                               | 0.0084                                           | 0.0032                                                                      | 0.7864                                                                        |
| 9530092B13Rik      | NA                            | AK020660         | 0.131                                              | -0.469                                               | 0.0112                                           | 0.7355                                                                      | 0.0064                                                                        |
| 9630010G10Rik      | NA                            | AK035845         | 0.417                                              | -0.178                                               | 0.0219                                           | 0.0236                                                                      | 0.4692                                                                        |
| 9630025I21Rik      | RIKEN cDNA<br>9630025I21 gene | AK079330         | 0.713                                              | -0.170                                               | 0.0196                                           | 0.0264                                                                      | 0.4014                                                                        |
| 9630033F20Rik      | RIKEN cDNA<br>9630033F20 gene | XM_001003452     | 0.220                                              | -0.229                                               | 0.0316                                           | 0.2079                                                                      | 0.0999                                                                        |
| 9630037P07Rik      | RIKEN cDNA<br>9630037P07 gene | XM_001001771     | 0.657                                              | -0.175                                               | 0.0038                                           | 0.0090                                                                      | 0.2463                                                                        |
| 9930012K11Rik      | RIKEN cDNA<br>9930012K11 gene | AK036801         | 0.310                                              | -0.400                                               | 0.0001                                           | 0.0137                                                                      | 0.0069                                                                        |
| 9930021D14Rik      | NA                            | NM_175682        | 0.347                                              | -0.163                                               | 0.0455                                           | 0.0837                                                                      | 0.3279                                                                        |
| A230058J24Rik      | NA                            | XM_620337        | 0.347                                              | -0.143                                               | 0.0013                                           | 0.0018                                                                      | 0.3497                                                                        |
| A230060L24Rik      | NA                            | AK038764         | 0.251                                              | -0.564                                               | 0.0076                                           | 0.1372                                                                      | 0.0395                                                                        |
| A230097K15Rik      | NA                            | AK138410         | 0.236                                              | -0.232                                               | 0.0009                                           | 0.0241                                                                      | 0.0305                                                                        |
| A230107C01Rik      | NA                            | AK039202         | 0.663                                              | -0.265                                               | 0.0000                                           | 0.0000                                                                      | 0.0064                                                                        |
| A2m                | alpha-2-<br>macroglobulin     | XR_005046        | 0.185                                              | -0.390                                               | 0.0001                                           | 0.2515                                                                      | 0.0002                                                                        |
| A330019N05Rik      | RIKEN cDNA<br>A330019N05 gene | AK079058         | 0.283                                              | -0.247                                               | 0.0030                                           | 0.0605                                                                      | 0.0377                                                                        |
| A430041B07Rik      | RIKEN cDNA<br>A430041B07 gene | XM_896986        | 0.244                                              | -0.200                                               | 0.0113                                           | 0.1762                                                                      | 0.0438                                                                        |
| A430110M15Rik      | NA                            | AK040633         | 0.454                                              | -0.371                                               | 0.0371                                           | 0.0308                                                                      | 0.5683                                                                        |

**Table S1.** Continued.

| <b>Gene Symbol</b> | <b>Gene Name</b>                                                                      | <b>Entrez ID</b> | <b>Fold Change<br/><i>MECP2</i>-Tg<br/>over WT</b> | <b>Fold Change<br/><i>Mecp2</i>-null<br/>over WT</b> | <b>FDR-<br/>adjusted<br/>p-value<br/>(Total)</b> | <b>FDR-<br/>adjusted<br/>p-value<br/>(<i>MECP2</i>-<br/>Tg over<br/>WT)</b> | <b>FDR-<br/>adjusted<br/>p-value<br/>(<i>Mecp2</i>-<br/>null over<br/>WT)</b> |
|--------------------|---------------------------------------------------------------------------------------|------------------|----------------------------------------------------|------------------------------------------------------|--------------------------------------------------|-----------------------------------------------------------------------------|-------------------------------------------------------------------------------|
| A530016O06Rik      | RIKEN cDNA<br>A530016O06 gene                                                         | AK039191         | 0.242                                              | -0.252                                               | 0.0010                                           | 0.0665                                                                      | 0.0114                                                                        |
| A530054K11Rik      | RIKEN cDNA<br>A530054K11 gene                                                         | NM_183146        | 0.296                                              | -0.211                                               | 0.0122                                           | 0.0464                                                                      | 0.1768                                                                        |
| A530082C11Rik      | RIKEN cDNA<br>A530082C11 gene                                                         | AK142259         | 0.358                                              | -0.103                                               | 0.0001                                           | 0.0002                                                                      | 0.2891                                                                        |
| A530094I17Rik      | RIKEN cDNA<br>A530094I17 gene                                                         | AK041250         | 0.306                                              | -0.343                                               | 0.0175                                           | 0.0685                                                                      | 0.1708                                                                        |
| A630033E08Rik      | RIKEN cDNA<br>A630033E08 gene                                                         | BC078460         | 0.786                                              | -0.448                                               | 0.0000                                           | 0.0000                                                                      | 0.0051                                                                        |
| A630083H20Rik      | NA                                                                                    | AK080376         | 0.522                                              | -0.540                                               | 0.0002                                           | 0.0476                                                                      | 0.0029                                                                        |
| A730008L03Rik      | RIKEN cDNA<br>A730008L03 gene                                                         | AK046129         | 0.606                                              | -0.138                                               | 0.0000                                           | 0.0000                                                                      | 0.0574                                                                        |
| A730098D12Rik      | RIKEN cDNA<br>A730098D12 gene                                                         | AK075709         | 0.359                                              | -0.158                                               | 0.0361                                           | 0.1420                                                                      | 0.1660                                                                        |
| A830058L05Rik      | RIKEN cDNA<br>A830058L05 gene                                                         | NM_172486        | 0.332                                              | -0.359                                               | 0.0439                                           | 0.2237                                                                      | 0.1269                                                                        |
| A830080H07Rik      | NA                                                                                    | AK083579         | 0.481                                              | -0.637                                               | 0.0042                                           | 0.1934                                                                      | 0.0143                                                                        |
| A830093I24Rik      | NA                                                                                    | AK044133         | 0.039                                              | -0.428                                               | 0.0273                                           | 0.9133                                                                      | 0.0109                                                                        |
| A930018M24Rik      | NA                                                                                    | XM_907235        | 0.484                                              | -0.354                                               | 0.0135                                           | 0.0951                                                                      | 0.1004                                                                        |
| Aacs               | acetoacetyl-CoA<br>synthetase                                                         | NM_030210        | 0.320                                              | -0.112                                               | 0.0000                                           | 0.0001                                                                      | 0.0176                                                                        |
| Aamp               | angio-associated<br>migratory protein                                                 | AK183212         | 0.330                                              | -0.084                                               | 0.0054                                           | 0.0151                                                                      | 0.2215                                                                        |
| Aasdhppt           | aminoadipate-<br>semialdehyde<br>dehydrogenase-<br>phosphopantetheinyl<br>transferase | NM_026276        | 0.338                                              | -0.137                                               | 0.0001                                           | 0.0008                                                                      | 0.0893                                                                        |
| Abca8a             | ATP-binding<br>cassette, sub-family<br>A (ABC1), member<br>8a                         | NM_153145        | 0.762                                              | -0.820                                               | 0.0000                                           | 0.0000                                                                      | 0.0000                                                                        |
| Abca8b             | ATP-binding<br>cassette, sub-family<br>A(ABC1),member 8b                              | NM_013851        | 0.103                                              | -0.367                                               | 0.0000                                           | 0.1518                                                                      | 0.0000                                                                        |
| Abcb10             | ATP-binding<br>cassette, sub-family<br>B (MDR/TAP),<br>member 10                      | AK011569         | 0.321                                              | -0.151                                               | 0.0000                                           | 0.0009                                                                      | 0.0194                                                                        |
| Abcb6              | ATP-binding<br>cassette, sub-family<br>B (MDR/TAP),<br>member 6                       | AK040323         | 0.539                                              | -0.179                                               | 0.0000                                           | 0.0000                                                                      | 0.0015                                                                        |

**Table S1.** Continued.

| <b>Gene Symbol</b> | <b>Gene Name</b>                                                                              | <b>Entrez ID</b> | <b>Fold Change<br/><i>MECP2</i>-Tg<br/>over WT</b> | <b>Fold Change<br/><i>Mecp2</i>-null<br/>over WT</b> | <b>FDR-<br/>adjusted<br/>p-value<br/>(Total)</b> | <b>FDR-<br/>adjusted<br/>p-value<br/>(<i>MECP2</i>-<br/>Tg over<br/>WT)</b> | <b>FDR-<br/>adjusted<br/>p-value<br/>(<i>Mecp2</i>-<br/>null over<br/>WT)</b> |
|--------------------|-----------------------------------------------------------------------------------------------|------------------|----------------------------------------------------|------------------------------------------------------|--------------------------------------------------|-----------------------------------------------------------------------------|-------------------------------------------------------------------------------|
| Abcd1              | ATP-binding cassette, sub-family D (ALD), member 1                                            | AK153589         | 0.285                                              | -0.282                                               | 0.0000                                           | 0.0304                                                                      | 0.0006                                                                        |
| Abcg2              | ATP-binding cassette, sub-family G (WHITE), member 2                                          | NM_011920        | 0.108                                              | -0.306                                               | 0.0009                                           | 0.5529                                                                      | 0.0007                                                                        |
| Abhd1              | abhydrolase domain containing 1                                                               | BC013505         | 0.301                                              | -0.111                                               | 0.0441                                           | 0.0413                                                                      | 0.5317                                                                        |
| Abhd11             | abhydrolase domain containing 11                                                              | BC069866         | 0.408                                              | -0.223                                               | 0.0011                                           | 0.0229                                                                      | 0.0387                                                                        |
| Ablim3             | actin binding LIM protein family, member 3                                                    | NM_198649        | 0.243                                              | -0.242                                               | 0.0000                                           | 0.0000                                                                      | 0.0000                                                                        |
| Acat2              | acetyl-Coenzyme A acetyltransferase 2                                                         | NM_153151        | 0.364                                              | -0.154                                               | 0.0000                                           | 0.0001                                                                      | 0.0382                                                                        |
| Accn2              | amiloride-sensitive cation channel 2, neuronal                                                | AB208022         | 0.284                                              | -0.281                                               | 0.0000                                           | 0.0000                                                                      | 0.0002                                                                        |
| Accn4              | amiloride-sensitive cation channel 4, pituitary                                               | NM_183022        | 0.255                                              | -0.331                                               | 0.0002                                           | 0.0464                                                                      | 0.0038                                                                        |
| Ace                | angiotensin I converting enzyme (peptidyl-dipeptidase A) 1                                    | J04947           | 0.318                                              | -0.422                                               | 0.0000                                           | 0.0000                                                                      | 0.0000                                                                        |
| Ache               | acetylcholinesterase                                                                          | AY389978         | 0.682                                              | -0.581                                               | 0.0000                                           | 0.0000                                                                      | 0.0000                                                                        |
| Acot8              | acyl-CoA thioesterase 8                                                                       | BC052526         | 0.282                                              | -0.174                                               | 0.0036                                           | 0.0170                                                                      | 0.1439                                                                        |
| Acot9              | acyl-CoA thioesterase 9                                                                       | NM_022816        | 0.337                                              | -0.242                                               | 0.0027                                           | 0.0356                                                                      | 0.0572                                                                        |
| Acss1              | acyl-CoA synthetase short-chain family member 1                                               | NM_080575        | 0.380                                              | -0.184                                               | 0.0000                                           | 0.0000                                                                      | 0.0010                                                                        |
| Actl6a             | actin-like 6A                                                                                 | AK013221         | 0.449                                              | -0.137                                               | 0.0000                                           | 0.0000                                                                      | 0.1024                                                                        |
| Actl6b             | actin-like 6B                                                                                 | NM_031404        | 0.461                                              | -0.145                                               | 0.0000                                           | 0.0000                                                                      | 0.0393                                                                        |
| Adamts1            | a disintegrin-like and metallopeptidase (reprolysin type) with thrombospondin type 1 motif, 1 | NM_009621        | 0.341                                              | -0.329                                               | 0.0000                                           | 0.0008                                                                      | 0.0027                                                                        |

**Table S1.** Continued.

| <b>Gene Symbol</b> | <b>Gene Name</b>                                                                                | <b>Entrez ID</b> | <b>Fold Change<br/><i>MECP2</i>-Tg<br/>over WT</b> | <b>Fold Change<br/><i>Mecp2</i>-null<br/>over WT</b> | <b>FDR-<br/>adjusted<br/>p-value<br/>(Total)</b> | <b>FDR-<br/>adjusted<br/>p-value<br/>(<i>MECP2</i>-<br/>Tg over<br/>WT)</b> | <b>FDR-<br/>adjusted<br/>p-value<br/>(<i>Mecp2</i>-<br/>null over<br/>WT)</b> |
|--------------------|-------------------------------------------------------------------------------------------------|------------------|----------------------------------------------------|------------------------------------------------------|--------------------------------------------------|-----------------------------------------------------------------------------|-------------------------------------------------------------------------------|
| Adamts10           | a disintegrin-like and metalloproteinase (reprolysin type) with thrombospondin type 1 motif, 10 | AK034565         | 0.283                                              | -0.439                                               | 0.0000                                           | 0.0000                                                                      | 0.0000                                                                        |
| Adamts4            | a disintegrin-like and metalloproteinase (reprolysin type) with thrombospondin type 1 motif, 4  | AK076295         | 0.273                                              | -0.152                                               | 0.0003                                           | 0.0179                                                                      | 0.0121                                                                        |
| Adamts6            | a disintegrin-like and metalloproteinase (reprolysin type) with thrombospondin type 1 motif, 6  | XM_001002065     | 0.378                                              | -0.371                                               | 0.0000                                           | 0.0000                                                                      | 0.0000                                                                        |
| Adamts12           | ADAMTS-like 2                                                                                   | NM_029981        | 0.186                                              | -0.347                                               | 0.0000                                           | 0.0069                                                                      | 0.0000                                                                        |
| Adamts14           | NA                                                                                              | NM_144899        | 0.174                                              | -0.249                                               | 0.0000                                           | 0.0392                                                                      | 0.0002                                                                        |
| Adck4              | aarF domain containing kinase 4                                                                 | NM_133770        | 0.448                                              | -0.134                                               | 0.0000                                           | 0.0000                                                                      | 0.0452                                                                        |
| Adck5              | aarF domain containing kinase 5                                                                 | BC053696         | 0.313                                              | -0.120                                               | 0.0015                                           | 0.0032                                                                      | 0.2604                                                                        |
| Adcy3              | adenylate cyclase 3                                                                             | NM_138305        | 0.198                                              | -0.244                                               | 0.0000                                           | 0.0029                                                                      | 0.0000                                                                        |
| Adcy5              | adenylate cyclase 5                                                                             | NM_001012765     | 0.307                                              | -0.109                                               | 0.0000                                           | 0.0000                                                                      | 0.0001                                                                        |
| Adcy7              | adenylate cyclase 7                                                                             | NM_001037723     | 0.249                                              | -0.318                                               | 0.0000                                           | 0.0000                                                                      | 0.0000                                                                        |
| Adcyap1            | adenylate cyclase activating polypeptide 1                                                      | NM_009625        | 0.875                                              | -0.724                                               | 0.0000                                           | 0.0000                                                                      | 0.0000                                                                        |
| Adfp               | adipose differentiation related protein                                                         | NM_007408        | 0.336                                              | -0.205                                               | 0.0002                                           | 0.0019                                                                      | 0.0816                                                                        |
| Adra2a             | adrenergic receptor, alpha 2a                                                                   | NM_007417        | 0.377                                              | -0.235                                               | 0.0071                                           | 0.1165                                                                      | 0.0436                                                                        |
| Aebp2              | AE binding protein 2                                                                            | NM_009637        | 0.256                                              | -0.145                                               | 0.0003                                           | 0.0021                                                                      | 0.0876                                                                        |
| Agpat4             | 1-acylglycerol-3-phosphate O-acyltransferase 1 (lysophosphatidic acid acyltransferase, delta)   | NM_026644        | 0.287                                              | -0.226                                               | 0.0002                                           | 0.0354                                                                      | 0.0051                                                                        |
| Agtrin             | NA                                                                                              | NM_021604        | 0.339                                              | -0.123                                               | 0.0000                                           | 0.0000                                                                      | 0.0000                                                                        |
| AgRP               | agouti related protein                                                                          | AK138796         | 0.866                                              | -0.289                                               | 0.0017                                           | 0.0023                                                                      | 0.3491                                                                        |
| AI462493           | expressed sequence AI462493                                                                     | BC029863         | 0.527                                              | -0.142                                               | 0.0472                                           | 0.0495                                                                      | 0.4962                                                                        |

**Table S1.** Continued.

| <b>Gene Symbol</b> | <b>Gene Name</b>                                                                                               | <b>Entrez ID</b> | <b>Fold Change<br/><i>MECP2</i>-Tg<br/>over WT</b> | <b>Fold Change<br/><i>Mecp2</i>-null<br/>over WT</b> | <b>FDR-<br/>adjusted<br/>p-value<br/>(Total)</b> | <b>FDR-<br/>adjusted<br/>p-value<br/>(<i>MECP2</i>-<br/>Tg over<br/>WT)</b> | <b>FDR-<br/>adjusted<br/>p-value<br/>(<i>Mecp2</i>-<br/>null over<br/>WT)</b> |
|--------------------|----------------------------------------------------------------------------------------------------------------|------------------|----------------------------------------------------|------------------------------------------------------|--------------------------------------------------|-----------------------------------------------------------------------------|-------------------------------------------------------------------------------|
| AI504432           | expressed sequence<br>AI504432                                                                                 | AK030783         | 0.489                                              | -0.409                                               | 0.0100                                           | 0.1267                                                                      | 0.0555                                                                        |
| AI597468           | expressed sequence<br>AI597468                                                                                 | AK005698         | 0.670                                              | -0.156                                               | 0.0180                                           | 0.0125                                                                      | 0.6005                                                                        |
| AI646023           | expressed sequence<br>AI646023                                                                                 | NM_198860        | 0.405                                              | -0.379                                               | 0.0000                                           | 0.0006                                                                      | 0.0324                                                                        |
| AI846148           | NA                                                                                                             | AK166227         | 0.260                                              | -0.240                                               | 0.0001                                           | 0.0057                                                                      | 0.0159                                                                        |
| AI848149           | expressed sequence<br>AI848149                                                                                 | AK141827         | 0.799                                              | -0.417                                               | 0.0202                                           | 0.0235                                                                      | 0.4430                                                                        |
| AI851716           | expressed sequence<br>AI851716                                                                                 | AK133701         | 0.353                                              | -0.193                                               | 0.0443                                           | 0.0591                                                                      | 0.4155                                                                        |
| Aifm1              | NA                                                                                                             | AK165762         | 0.320                                              | -0.143                                               | 0.0000                                           | 0.0006                                                                      | 0.0550                                                                        |
| Aig1               | androgen-induced 1                                                                                             | AK147713         | 0.351                                              | -0.114                                               | 0.0085                                           | 0.0106                                                                      | 0.4050                                                                        |
| AK122209           | cDNA sequence<br>AK122209                                                                                      | NM_001029876     | 0.225                                              | -0.181                                               | 0.0103                                           | 0.1002                                                                      | 0.0732                                                                        |
| AK129341           | cDNA sequence<br>AK129341                                                                                      | AK129341         | 0.190                                              | -0.241                                               | 0.0272                                           | 0.3083                                                                      | 0.0550                                                                        |
| Akr1a4             | aldo-keto reductase<br>family 1, member A4<br>(aldehyde reductase)                                             | AK181349         | 0.377                                              | -0.063                                               | 0.0085                                           | 0.0183                                                                      | 0.2770                                                                        |
| Akr1c14            | NA                                                                                                             | NM_134072        | 0.473                                              | -0.424                                               | 0.0000                                           | 0.0064                                                                      | 0.0048                                                                        |
| Akr1e1             | aldo-keto reductase<br>family 1, member E1                                                                     | NM_018859        | 0.180                                              | -0.367                                               | 0.0000                                           | 0.1068                                                                      | 0.0001                                                                        |
| Akr7a5             | aldo-keto reductase<br>family 7, member A5<br>(aflatoxin aldehyde<br>reductase)                                | BC031857         | 0.300                                              | -0.211                                               | 0.0224                                           | 0.1309                                                                      | 0.1164                                                                        |
| Aldh1a1            | aldehyde<br>dehydrogenase<br>family 1, subfamily<br>A1                                                         | NM_013467        | 0.223                                              | -0.350                                               | 0.0000                                           | 0.0249                                                                      | 0.0000                                                                        |
| Aldh1a7            | aldehyde<br>dehydrogenase<br>family 1, subfamily<br>A7                                                         | NM_011921        | 0.198                                              | -0.300                                               | 0.0023                                           | 0.1279                                                                      | 0.0131                                                                        |
| Aldh4a1            | aldehyde<br>dehydrogenase 4<br>family, member A1                                                               | NM_175438        | 0.379                                              | -0.156                                               | 0.0000                                           | 0.0001                                                                      | 0.0273                                                                        |
| Alg5               | asparagine-linked<br>glycosylation 5<br>homolog (yeast,<br>dolichyl-phosphate<br>beta-<br>glucosyltransferase) | XM_988003        | 0.480                                              | -0.112                                               | 0.0000                                           | 0.0000                                                                      | 0.2851                                                                        |



**Table S1.** Continued.

| <b>Gene Symbol</b> | <b>Gene Name</b>                                                                  | <b>Entrez ID</b> | <b>Fold Change<br/><i>MECP2</i>-Tg<br/>over WT</b> | <b>Fold Change<br/><i>Mecp2</i>-null<br/>over WT</b> | <b>FDR-<br/>adjusted<br/>p-value<br/>(Total)</b> | <b>FDR-<br/>adjusted<br/>p-value<br/>(<i>MECP2</i>-<br/>Tg over<br/>WT)</b> | <b>FDR-<br/>adjusted<br/>p-value<br/>(<i>Mecp2</i>-<br/>null over<br/>WT)</b> |
|--------------------|-----------------------------------------------------------------------------------|------------------|----------------------------------------------------|------------------------------------------------------|--------------------------------------------------|-----------------------------------------------------------------------------|-------------------------------------------------------------------------------|
| Alg6               | asparagine-linked glycosylation 6 homolog (yeast, alpha-1,3,-glucosyltransferase) | AK084993         | 0.276                                              | -0.145                                               | 0.0025                                           | 0.0105                                                                      | 0.1534                                                                        |
| Alg8               | asparagine-linked glycosylation 8 homolog (yeast, alpha-1,3-glucosyltransferase)  | NM_024220        | 0.325                                              | -0.177                                               | 0.0002                                           | 0.0017                                                                      | 0.0893                                                                        |
| Alox12b            | arachidonate 12-lipoxygenase, 12R type                                            | XM_977240        | 0.366                                              | -0.161                                               | 0.0003                                           | 0.0006                                                                      | 0.3043                                                                        |
| Aloxe3             | arachidonate lipoxygenase 3                                                       | AK141003         | 0.465                                              | -0.519                                               | 0.0000                                           | 0.0000                                                                      | 0.0000                                                                        |
| Als2cr4            | amyotrophic lateral sclerosis 2 (juvenile) chromosome region, candidate 4         | AK133112         | 0.487                                              | -0.196                                               | 0.0003                                           | 0.0028                                                                      | 0.0826                                                                        |
| Amotl2             | angiomin like 2                                                                   | BC108411         | 0.303                                              | -0.103                                               | 0.0000                                           | 0.0000                                                                      | 0.1537                                                                        |
| Ampd2              | adenosine monophosphate deaminase 2 (isoform L)                                   | AK034844         | 0.286                                              | -0.143                                               | 0.0000                                           | 0.0000                                                                      | 0.0001                                                                        |
| Amy2-2             | NA                                                                                | XM_911199        | 0.418                                              | -0.179                                               | 0.0373                                           | 0.0514                                                                      | 0.4056                                                                        |
| Ankrd13d           | ankyrin repeat domain 13 family, member D                                         | AK089186         | 0.214                                              | -0.206                                               | 0.0000                                           | 0.0163                                                                      | 0.0003                                                                        |
| Ankrd15            | ankyrin repeat domain 15                                                          | AK020911         | 0.459                                              | -0.184                                               | 0.0000                                           | 0.0000                                                                      | 0.0235                                                                        |
| Ankrd42            | NA                                                                                | NM_028665        | 0.205                                              | -0.303                                               | 0.0000                                           | 0.0526                                                                      | 0.0000                                                                        |
| Ankrd45            | ankyrin repeat domain 45                                                          | XM_355251        | 0.407                                              | -0.135                                               | 0.0330                                           | 0.0247                                                                      | 0.5984                                                                        |
| Anxa1              | annexin A1                                                                        | NM_010730        | 0.321                                              | -0.151                                               | 0.0086                                           | 0.0123                                                                      | 0.3686                                                                        |
| Anxa4              | annexin A4                                                                        | AK168917         | 0.328                                              | -0.157                                               | 0.0194                                           | 0.0267                                                                      | 0.3963                                                                        |
| Ap1s2              | adaptor-related protein complex 1, sigma 2 subunit                                | NM_026887        | 0.431                                              | -0.307                                               | 0.0024                                           | 0.0055                                                                      | 0.2462                                                                        |
| Ap4m1              | adaptor-related protein complex AP-4, mu 1                                        | AF242858         | 0.371                                              | -0.153                                               | 0.0000                                           | 0.0003                                                                      | 0.0115                                                                        |

**Table S1.** Continued.

| <b>Gene Symbol</b> | <b>Gene Name</b>                                                          | <b>Entrez ID</b> | <b>Fold Change<br/><i>MECP2</i>-Tg<br/>over WT</b> | <b>Fold Change<br/><i>Mecp2</i>-null<br/>over WT</b> | <b>FDR-<br/>adjusted<br/>p-value<br/>(Total)</b> | <b>FDR-<br/>adjusted<br/>p-value<br/>(<i>MECP2</i>-<br/>Tg over<br/>WT)</b> | <b>FDR-<br/>adjusted<br/>p-value<br/>(<i>Mecp2</i>-<br/>null over<br/>WT)</b> |
|--------------------|---------------------------------------------------------------------------|------------------|----------------------------------------------------|------------------------------------------------------|--------------------------------------------------|-----------------------------------------------------------------------------|-------------------------------------------------------------------------------|
| Apbb1              | amyloid beta (A4)<br>precursor protein-<br>binding, family B,<br>member 1 | NM_009685        | 0.309                                              | -0.092                                               | 0.0001                                           | 0.0008                                                                      | 0.0751                                                                        |
| Apbb3              | amyloid beta (A4)<br>precursor protein-<br>binding, family B,<br>member 3 | AK171634         | 0.278                                              | -0.139                                               | 0.0000                                           | 0.0034                                                                      | 0.0117                                                                        |
| Apcdd1             | adenomatosis<br>polyposis coli down-<br>regulated 1                       | NM_133237        | 0.447                                              | -0.128                                               | 0.0003                                           | 0.0013                                                                      | 0.1616                                                                        |
| Apex2              | apurinic/aprimidinic<br>endonuclease 2                                    | AK080916         | 0.306                                              | -0.200                                               | 0.0000                                           | 0.0003                                                                      | 0.0298                                                                        |
| Aph1a              | anterior pharynx<br>defective 1a homolog<br>( <i>C. elegans</i> )         | BC057865         | 0.396                                              | -0.012                                               | 0.0000                                           | 0.0000                                                                      | 0.9442                                                                        |
| Apoc1              | apolipoprotein C-I                                                        | NM_007469        | 0.777                                              | -0.494                                               | 0.0012                                           | 0.0165                                                                      | 0.0570                                                                        |
| Appbp1             | amyloid beta<br>precursor protein<br>binding protein 1                    | AK038756         | 0.331                                              | -0.236                                               | 0.0000                                           | 0.0024                                                                      | 0.0008                                                                        |
| Ar                 | androgen receptor                                                         | NM_013476        | 0.208                                              | -0.249                                               | 0.0008                                           | 0.0548                                                                      | 0.0120                                                                        |
| Ard1               | N-acetyltransferase<br>ARD1 homolog ( <i>S.</i><br><i>cerevisiae</i> )    | AK078700         | 0.316                                              | -0.138                                               | 0.0000                                           | 0.0001                                                                      | 0.0891                                                                        |
| Arf2               | ADP-ribosylation<br>factor 2                                              | AK042977         | 0.311                                              | -0.143                                               | 0.0036                                           | 0.0308                                                                      | 0.0860                                                                        |
| Arfip2             | ADP-ribosylation<br>factor interacting<br>protein 2                       | BC079603         | 0.329                                              | -0.078                                               | 0.0005                                           | 0.0011                                                                      | 0.2636                                                                        |
| Arfrp1             | ADP-ribosylation<br>factor related protein<br>1                           | AK083490         | 0.225                                              | -0.185                                               | 0.0027                                           | 0.0919                                                                      | 0.0216                                                                        |
| Arg2               | arginase type II                                                          | NM_009705        | 0.622                                              | -0.339                                               | 0.0000                                           | 0.0000                                                                      | 0.0222                                                                        |
| Arhgap8            | Rho GTPase<br>activating protein 8                                        | AK028831         | 0.176                                              | -0.260                                               | 0.0107                                           | 0.3685                                                                      | 0.0172                                                                        |
| Arhgdig            | Rho GDP<br>dissociation inhibitor<br>(GDI) gamma                          | XM_989487        | 0.636                                              | -0.546                                               | 0.0000                                           | 0.0009                                                                      | 0.0000                                                                        |
| Arhgef1            | Rho guanine<br>nucleotide exchange<br>factor (GEF) 1                      | NM_008488        | 0.307                                              | -0.128                                               | 0.0000                                           | 0.0000                                                                      | 0.0201                                                                        |
| Arid3a             | AT rich interactive<br>domain 3A (Bright<br>like)                         | BC016531         | 0.221                                              | -0.250                                               | 0.0000                                           | 0.0060                                                                      | 0.0004                                                                        |

**Table S1.** Continued.

| <b>Gene Symbol</b> | <b>Gene Name</b>                                             | <b>Entrez ID</b> | <b>Fold Change<br/><i>MECP2</i>-Tg<br/>over WT</b> | <b>Fold Change<br/><i>Mecp2</i>-null<br/>over WT</b> | <b>FDR-<br/>adjusted<br/>p-value<br/>(Total)</b> | <b>FDR-<br/>adjusted<br/>p-value<br/>(<i>MECP2</i>-<br/>Tg over<br/>WT)</b> | <b>FDR-<br/>adjusted<br/>p-value<br/>(<i>Mecp2</i>-<br/>null over<br/>WT)</b> |
|--------------------|--------------------------------------------------------------|------------------|----------------------------------------------------|------------------------------------------------------|--------------------------------------------------|-----------------------------------------------------------------------------|-------------------------------------------------------------------------------|
| Arl6ip5            | ADP-ribosylation factor-like 6                               | D87211           | 0.277                                              | -0.220                                               | 0.0020                                           | 0.1146                                                                      | 0.0130                                                                        |
| Armc5              | interacting protein 5 armadillo repeat containing 5          | NM_146205        | 0.420                                              | -0.187                                               | 0.0000                                           | 0.0000                                                                      | 0.1506                                                                        |
| Armc6              | armadillo repeat containing 6                                | NM_133972        | 0.448                                              | -0.114                                               | 0.0000                                           | 0.0000                                                                      | 0.3643                                                                        |
| Armcx6             | NA                                                           | NM_001007578     | 0.319                                              | -0.314                                               | 0.0022                                           | 0.0194                                                                      | 0.0816                                                                        |
| Arpc1a             | actin related protein 2/3 complex, subunit 1A                | NM_019767        | 0.474                                              | -0.120                                               | 0.0002                                           | 0.0053                                                                      | 0.0352                                                                        |
| Arpc5l             | actin related protein 2/3 complex, subunit 5-like            | AK037305         | 0.632                                              | -0.212                                               | 0.0000                                           | 0.0004                                                                      | 0.0450                                                                        |
| Arrb2              | arrestin, beta 2                                             | AK089542         | 0.310                                              | -0.165                                               | 0.0000                                           | 0.0000                                                                      | 0.0003                                                                        |
| Arrdc1             | arrestin domain containing 1                                 | NM_178408        | 0.318                                              | -0.145                                               | 0.0002                                           | 0.0009                                                                      | 0.1599                                                                        |
| Arrdc4             | arrestin domain containing 4                                 | NM_001042592     | 0.452                                              | -0.199                                               | 0.0000                                           | 0.0001                                                                      | 0.0922                                                                        |
| Arsa               | arylsulfatase A                                              | AK082325         | 0.200                                              | -0.253                                               | 0.0000                                           | 0.1164                                                                      | 0.0000                                                                        |
| Arts1              | NA                                                           | AK163954         | 0.252                                              | -0.262                                               | 0.0000                                           | 0.0051                                                                      | 0.0023                                                                        |
| Arvcf              | armadillo repeat gene deleted in velo-cardio-facial syndrome | AK053865         | 0.348                                              | -0.243                                               | 0.0000                                           | 0.0000                                                                      | 0.0000                                                                        |
| As3mt              | arsenic (+3 oxidation state) methyltransferase               | NM_020577        | 0.203                                              | -0.311                                               | 0.0003                                           | 0.1951                                                                      | 0.0011                                                                        |
| Asb2               | ankyrin repeat and SOCS box-containing protein 2             | AK083400         | 0.338                                              | -0.171                                               | 0.0002                                           | 0.0102                                                                      | 0.0178                                                                        |
| Asb3               | ankyrin repeat and SOCS box-containing protein 3             | NM_023906        | 0.259                                              | -0.196                                               | 0.0006                                           | 0.0159                                                                      | 0.0320                                                                        |
| Asnsd1             | NA                                                           | XM_977614        | 0.326                                              | -0.302                                               | 0.0000                                           | 0.0041                                                                      | 0.0068                                                                        |
| Asphd2             | NA                                                           | AK020319         | 0.506                                              | -0.082                                               | 0.0006                                           | 0.0004                                                                      | 0.5603                                                                        |
| Atad2              | ATPase family, AAA domain containing 2                       | NM_027435        | 0.390                                              | -0.185                                               | 0.0000                                           | 0.0000                                                                      | 0.0601                                                                        |
| Atg9a              | NA                                                           | AK040323         | 0.363                                              | -0.083                                               | 0.0000                                           | 0.0000                                                                      | 0.1392                                                                        |
| Ath1l              | NA                                                           | AK171694         | 0.354                                              | -0.160                                               | 0.0000                                           | 0.0001                                                                      | 0.1131                                                                        |
| Atp2a3             | ATPase, Ca <sup>++</sup> transporting, ubiquitous            | NM_016745        | 0.249                                              | -0.182                                               | 0.0000                                           | 0.0001                                                                      | 0.0011                                                                        |

**Table S1.** Continued.

| <b>Gene Symbol</b> | <b>Gene Name</b>                                                               | <b>Entrez ID</b> | <b>Fold Change<br/><i>MECP2</i>-Tg<br/>over WT</b> | <b>Fold Change<br/><i>Mecp2</i>-null<br/>over WT</b> | <b>FDR-<br/>adjusted<br/>p-value<br/>(Total)</b> | <b>FDR-<br/>adjusted<br/>p-value<br/>(<i>MECP2</i>-<br/>Tg over<br/>WT)</b> | <b>FDR-<br/>adjusted<br/>p-value<br/>(<i>Mecp2</i>-<br/>null over<br/>WT)</b> |
|--------------------|--------------------------------------------------------------------------------|------------------|----------------------------------------------------|------------------------------------------------------|--------------------------------------------------|-----------------------------------------------------------------------------|-------------------------------------------------------------------------------|
| Atp5j              | ATP synthase, H+<br>transporting,<br>mitochondrial F0<br>complex, subunit F    | XM_975732        | 0.589                                              | -0.023                                               | 0.0001                                           | 0.0000                                                                      | 0.8605                                                                        |
| Atp5s              | ATP synthase, H+<br>transporting,<br>mitochondrial F0<br>complex, subunit s    | NM_026536        | 0.539                                              | -0.310                                               | 0.0013                                           | 0.0197                                                                      | 0.0502                                                                        |
| Atpbd1c            | ATP binding domain<br>1 family, member C                                       | NM_024216        | 0.467                                              | -0.106                                               | 0.0000                                           | 0.0000                                                                      | 0.3408                                                                        |
| Atxn7l2            | ataxin 7-like 2                                                                | NM_175183        | 0.278                                              | -0.138                                               | 0.0000                                           | 0.0001                                                                      | 0.0787                                                                        |
| AU022870           | expressed sequence<br>AU022870                                                 | AK171671         | 0.244                                              | -0.216                                               | 0.0013                                           | 0.0390                                                                      | 0.0260                                                                        |
| AU041783           | expressed sequence<br>AU041783                                                 | NM_146102        | 0.335                                              | -0.087                                               | 0.0000                                           | 0.0000                                                                      | 0.3324                                                                        |
| AV249152           | expressed sequence<br>AV249152                                                 | BC056139         | 0.149                                              | -0.256                                               | 0.0001                                           | 0.1391                                                                      | 0.0005                                                                        |
| AW060207           | expressed sequence<br>AW060207                                                 | XR_002899        | 0.211                                              | -0.311                                               | 0.0108                                           | 0.2291                                                                      | 0.0310                                                                        |
| AW146242           | expressed sequence<br>AW146242                                                 | NM_146168        | 0.314                                              | -0.219                                               | 0.0032                                           | 0.0321                                                                      | 0.0735                                                                        |
| AW551984           | expressed sequence<br>AW551984                                                 | NM_178737        | 0.726                                              | -0.976                                               | 0.0000                                           | 0.0000                                                                      | 0.0000                                                                        |
| AW555464           | expressed sequence<br>AW555464                                                 | NM_001024602     | 0.266                                              | -0.186                                               | 0.0000                                           | 0.0000                                                                      | 0.0000                                                                        |
| AW557046           | expressed sequence<br>AW557046                                                 | AK153592         | 0.427                                              | -0.438                                               | 0.0022                                           | 0.0333                                                                      | 0.0493                                                                        |
| B130050I23Rik      | RIKEN cDNA<br>B130050I23 gene                                                  | AK045240         | 0.331                                              | -0.184                                               | 0.0000                                           | 0.0000                                                                      | 0.0000                                                                        |
| B230216G23Rik      | RIKEN cDNA<br>B230216G23 gene                                                  | AK009991         | 0.282                                              | -0.251                                               | 0.0210                                           | 0.2389                                                                      | 0.0571                                                                        |
| B230312A22Rik      | RIKEN cDNA<br>B230312A22 gene                                                  | BC044832         | 0.341                                              | -0.168                                               | 0.0000                                           | 0.0006                                                                      | 0.0037                                                                        |
| B230340J04Rik      | NA                                                                             | AK046078         | 0.383                                              | -0.415                                               | 0.0267                                           | 0.2634                                                                      | 0.0652                                                                        |
| B3bp               | NA                                                                             | NM_001024917     | 0.176                                              | -0.244                                               | 0.0001                                           | 0.0603                                                                      | 0.0012                                                                        |
| B430211C08Rik      | NA                                                                             | AK016782         | 1.151                                              | -0.690                                               | 0.0000                                           | 0.0000                                                                      | 0.0008                                                                        |
| B4galt2            | UDP-<br>Gal:betaGlcNAc beta<br>1,4-<br>galactosyltransferase,<br>polypeptide 2 | NM_017377        | 0.342                                              | -0.120                                               | 0.0000                                           | 0.0000                                                                      | 0.0504                                                                        |

**Table S1.** Continued.

| <b>Gene Symbol</b> | <b>Gene Name</b>                                                               | <b>Entrez ID</b> | <b>Fold Change<br/><i>MECP2</i>-Tg<br/>over WT</b> | <b>Fold Change<br/><i>Mecp2</i>-null<br/>over WT</b> | <b>FDR-<br/>adjusted<br/>p-value<br/>(Total)</b> | <b>FDR-<br/>adjusted<br/>p-value<br/>(<i>MECP2</i>-<br/>Tg over<br/>WT)</b> | <b>FDR-<br/>adjusted<br/>p-value<br/>(<i>Mecp2</i>-<br/>null over<br/>WT)</b> |
|--------------------|--------------------------------------------------------------------------------|------------------|----------------------------------------------------|------------------------------------------------------|--------------------------------------------------|-----------------------------------------------------------------------------|-------------------------------------------------------------------------------|
| B4galt4            | UDP-<br>Gal:betaGlcNAc beta<br>1,4-<br>galactosyltransferase,<br>polypeptide 4 | AK045602         | 0.347                                              | -0.115                                               | 0.0034                                           | 0.0040                                                                      | 0.4037                                                                        |
| B630005N14Rik      | RIKEN cDNA<br>B630005N14 gene                                                  | AK170526         | 0.401                                              | -0.104                                               | 0.0012                                           | 0.0018                                                                      | 0.3357                                                                        |
| B930025P03Rik      | NA                                                                             | AK047141         | 0.355                                              | -0.377                                               | 0.0022                                           | 0.0749                                                                      | 0.0226                                                                        |
| Bai2               | brain-specific<br>angiogenesis<br>inhibitor 2                                  | AK144268         | 0.400                                              | -0.058                                               | 0.0000                                           | 0.0000                                                                      | 0.1629                                                                        |
| Bat5               | HLA-B associated<br>transcript 5                                               | NM_178592        | 0.336                                              | -0.107                                               | 0.0000                                           | 0.0000                                                                      | 0.0349                                                                        |
| BC002216           | cDNA sequence<br>BC002216                                                      | NM_024472        | 0.420                                              | -0.300                                               | 0.0299                                           | 0.1741                                                                      | 0.1148                                                                        |
| BC004044           | cDNA sequence<br>BC004044                                                      | AK149780         | 0.242                                              | -0.207                                               | 0.0001                                           | 0.0263                                                                      | 0.0030                                                                        |
| BC005764           | cDNA sequence<br>BC005764                                                      | BC098099         | 0.352                                              | -0.077                                               | 0.0000                                           | 0.0000                                                                      | 0.3834                                                                        |
| BC010787           | cDNA sequence<br>BC010787                                                      | NM_178577        | 0.307                                              | -0.370                                               | 0.0004                                           | 0.1441                                                                      | 0.0021                                                                        |
| BC011487           | cDNA sequence<br>BC011487                                                      | AK020704         | 0.699                                              | -0.493                                               | 0.0000                                           | 0.0005                                                                      | 0.0164                                                                        |
| BC013491           | cDNA sequence<br>BC013491                                                      | AK042062         | 0.390                                              | -0.104                                               | 0.0007                                           | 0.0004                                                                      | 0.5991                                                                        |
| BC013529           | cDNA sequence<br>BC013529                                                      | NM_145418        | 0.171                                              | -0.290                                               | 0.0000                                           | 0.1711                                                                      | 0.0002                                                                        |
| BC020077           | cDNA sequence<br>BC020077                                                      | AK143777         | 0.218                                              | -0.327                                               | 0.0257                                           | 0.3039                                                                      | 0.0528                                                                        |
| BC021767           | NA                                                                             | XM_619932        | 0.470                                              | -0.344                                               | 0.0063                                           | 0.0840                                                                      | 0.0546                                                                        |
| BC022687           | cDNA sequence<br>BC022687                                                      | BC022687         | 0.377                                              | -0.129                                               | 0.0432                                           | 0.0419                                                                      | 0.5193                                                                        |
| BC023882           | cDNA sequence<br>BC023882                                                      | AK049414         | 0.904                                              | -0.195                                               | 0.0284                                           | 0.0221                                                                      | 0.5811                                                                        |
| BC024814           | cDNA sequence<br>BC024814                                                      | NM_146247        | 0.265                                              | -0.166                                               | 0.0006                                           | 0.0139                                                                      | 0.0350                                                                        |
| BC025575           | cDNA sequence<br>BC025575                                                      | NM_199200        | 0.447                                              | -0.231                                               | 0.0000                                           | 0.0000                                                                      | 0.0008                                                                        |
| BC026585           | cDNA sequence<br>BC026585                                                      | XM_987821        | 0.372                                              | -0.134                                               | 0.0316                                           | 0.0608                                                                      | 0.3136                                                                        |
| BC027231           | cDNA sequence<br>BC027231                                                      | AK137274         | 0.372                                              | -0.221                                               | 0.0013                                           | 0.0048                                                                      | 0.1729                                                                        |
| BC028799           | cDNA sequence<br>BC028799                                                      | XM_001000297     | 0.223                                              | -0.228                                               | 0.0235                                           | 0.1014                                                                      | 0.1557                                                                        |

**Table S1.** Continued.

| <b>Gene Symbol</b> | <b>Gene Name</b>                                                    | <b>Entrez ID</b> | <b>Fold Change<br/><i>MECP2</i>-Tg<br/>over WT</b> | <b>Fold Change<br/><i>Mecp2</i>-null<br/>over WT</b> | <b>FDR-<br/>adjusted<br/>p-value<br/>(Total)</b> | <b>FDR-<br/>adjusted<br/>p-value<br/>(<i>MECP2</i>-<br/>Tg over<br/>WT)</b> | <b>FDR-<br/>adjusted<br/>p-value<br/>(<i>Mecp2</i>-<br/>null over<br/>WT)</b> |
|--------------------|---------------------------------------------------------------------|------------------|----------------------------------------------------|------------------------------------------------------|--------------------------------------------------|-----------------------------------------------------------------------------|-------------------------------------------------------------------------------|
| BC029214           | cDNA sequence<br>BC029214                                           | NM_153557        | 0.304                                              | -0.249                                               | 0.0000                                           | 0.0004                                                                      | 0.0185                                                                        |
| BC031781           | cDNA sequence<br>BC031781                                           | NM_145943        | 0.434                                              | -0.001                                               | 0.0000                                           | 0.0000                                                                      | 0.9983                                                                        |
| BC031853           | cDNA sequence<br>BC031853                                           | BC031853         | 0.239                                              | -0.234                                               | 0.0000                                           | 0.0001                                                                      | 0.0078                                                                        |
| BC034076           | NA                                                                  | AK083701         | 0.124                                              | -0.298                                               | 0.0016                                           | 0.2296                                                                      | 0.0044                                                                        |
| BC036313           | cDNA sequence<br>BC036313                                           | AK148355         | 0.252                                              | -0.228                                               | 0.0000                                           | 0.0000                                                                      | 0.0000                                                                        |
| BC037034           | cDNA sequence<br>BC037034                                           | BC040828         | 0.351                                              | -0.185                                               | 0.0000                                           | 0.0000                                                                      | 0.0015                                                                        |
| BC043476           | cDNA sequence<br>BC043476                                           | XM_900174        | 0.380                                              | -0.212                                               | 0.0395                                           | 0.0372                                                                      | 0.5257                                                                        |
| BC046404           | cDNA sequence<br>BC046404                                           | XM_974701        | 0.328                                              | -0.120                                               | 0.0371                                           | 0.0275                                                                      | 0.6077                                                                        |
| BC048355           | cDNA sequence<br>BC048355                                           | NM_207161        | 0.205                                              | -0.252                                               | 0.0150                                           | 0.1592                                                                      | 0.0646                                                                        |
| BC049807           | cDNA sequence<br>BC049807                                           | AK038795         | 0.270                                              | -0.521                                               | 0.0001                                           | 0.0352                                                                      | 0.0024                                                                        |
| BC050789           | cDNA sequence<br>BC050789                                           | NM_172515        | 0.196                                              | -0.346                                               | 0.0066                                           | 0.2746                                                                      | 0.0152                                                                        |
| BC052055           | cDNA sequence<br>BC052055                                           | AK048916         | 0.348                                              | -0.169                                               | 0.0000                                           | 0.0004                                                                      | 0.0165                                                                        |
| BC053749           | NA                                                                  | AK052345         | 0.450                                              | -0.353                                               | 0.0000                                           | 0.0000                                                                      | 0.0000                                                                        |
| BC062115           | NA                                                                  | NM_001024626     | 0.318                                              | -0.274                                               | 0.0375                                           | 0.1821                                                                      | 0.1351                                                                        |
| BC088983           | cDNA sequence<br>BC088983                                           | NM_001009951     | 0.293                                              | -0.261                                               | 0.0177                                           | 0.1111                                                                      | 0.1103                                                                        |
| Bcam               | NA                                                                  | NM_020486        | 0.507                                              | -0.399                                               | 0.0000                                           | 0.0000                                                                      | 0.0000                                                                        |
| Bcan               | brevican                                                            | NM_007529        | 0.391                                              | -0.112                                               | 0.0000                                           | 0.0000                                                                      | 0.0016                                                                        |
| Bcap31             | B-cell receptor-<br>associated protein 31                           | NM_012060        | 0.335                                              | -0.218                                               | 0.0001                                           | 0.1237                                                                      | 0.0005                                                                        |
| Bckdhb             | branched chain<br>ketoacid<br>dehydrogenase E1,<br>beta polypeptide | XM_918156        | 0.225                                              | -0.183                                               | 0.0021                                           | 0.0843                                                                      | 0.0192                                                                        |
| Bcl2l2             | Bcl2-like 2                                                         | AK020923         | 0.374                                              | -0.327                                               | 0.0034                                           | 0.0277                                                                      | 0.0888                                                                        |
| Bcorl1             | BCL6 co-repressor-<br>like 1                                        | XM_979298        | 0.281                                              | -0.146                                               | 0.0001                                           | 0.0023                                                                      | 0.0448                                                                        |
| Bdnf               | brain derived<br>neurotrophic factor                                | AY231132         | 0.771                                              | -0.491                                               | 0.0069                                           | 0.0877                                                                      | 0.0574                                                                        |
| BE136769           | NA                                                                  | BC028930         | 1.020                                              | -1.186                                               | 0.0394                                           | 0.1902                                                                      | 0.1354                                                                        |

**Table S1.** Continued.

| <b>Gene Symbol</b> | <b>Gene Name</b>                                                                       | <b>Entrez ID</b> | <b>Fold Change<br/><i>MECP2</i>-Tg<br/>over WT</b> | <b>Fold Change<br/><i>Mecp2</i>-null<br/>over WT</b> | <b>FDR-<br/>adjusted<br/>p-value<br/>(Total)</b> | <b>FDR-<br/>adjusted<br/>p-value<br/>(<i>MECP2</i>-<br/>Tg over<br/>WT)</b> | <b>FDR-<br/>adjusted<br/>p-value<br/>(<i>Mecp2</i>-<br/>null over<br/>WT)</b> |
|--------------------|----------------------------------------------------------------------------------------|------------------|----------------------------------------------------|------------------------------------------------------|--------------------------------------------------|-----------------------------------------------------------------------------|-------------------------------------------------------------------------------|
| Bet1               | blocked early in transport 1 homolog ( <i>S. cerevisiae</i> )                          | NM_009748        | 0.232                                              | -0.452                                               | 0.0415                                           | 0.3558                                                                      | 0.0713                                                                        |
| Bgn                | biglycan                                                                               | AK086920         | 0.424                                              | -0.093                                               | 0.0008                                           | 0.0005                                                                      | 0.5794                                                                        |
| Bhlhb9             | basic helix-loop-helix domain containing, class B9                                     | AK183392         | 0.625                                              | -0.224                                               | 0.0044                                           | 0.0136                                                                      | 0.2032                                                                        |
| Bivm               | basic, immunoglobulin-like variable motif containing                                   | NM_144558        | 0.344                                              | -0.231                                               | 0.0000                                           | 0.0032                                                                      | 0.0066                                                                        |
| Bmp4               | bone morphogenetic protein 4                                                           | X56848           | 0.447                                              | -0.273                                               | 0.0037                                           | 0.0206                                                                      | 0.1254                                                                        |
| Bola2              | bolA-like 2 ( <i>E. coli</i> )                                                         | BC061197         | 0.327                                              | -0.225                                               | 0.0003                                           | 0.0069                                                                      | 0.0387                                                                        |
| Bphl               | biphenyl hydrolase-like (serine hydrolase, breast epithelial mucin-associated antigen) | AK017801         | 0.481                                              | -0.174                                               | 0.0017                                           | 0.0115                                                                      | 0.1052                                                                        |
| Brcal              | breast cancer 1                                                                        | NM_009764        | 0.418                                              | -0.157                                               | 0.0000                                           | 0.0001                                                                      | 0.1392                                                                        |
| Brctd1             | BRCT domain containing 1                                                               | BC100362         | 0.189                                              | -0.329                                               | 0.0116                                           | 0.3100                                                                      | 0.0232                                                                        |
| Brp16              | brain protein 16                                                                       | NM_021555        | 0.409                                              | -0.130                                               | 0.0000                                           | 0.0000                                                                      | 0.2377                                                                        |
| Brp44              | brain protein 44                                                                       | NM_027430        | 0.651                                              | -0.067                                               | 0.0419                                           | 0.0221                                                                      | 0.7357                                                                        |
| Brs3               | bombesin-like receptor 3                                                               | NM_009766        | 0.698                                              | -0.386                                               | 0.0000                                           | 0.0005                                                                      | 0.0413                                                                        |
| Brunol6            | bruno-like 6, RNA binding protein ( <i>Drosophila</i> )                                | XM_977145        | 0.496                                              | -0.286                                               | 0.0000                                           | 0.0004                                                                      | 0.0011                                                                        |
| Bscl2              | Bernardinelli-Seip congenital lipodystrophy 2 homolog (human)                          | AK004634         | 0.313                                              | -0.090                                               | 0.0004                                           | 0.0049                                                                      | 0.0563                                                                        |
| Btd                | biotinidase                                                                            | NM_025295        | 0.415                                              | -0.331                                               | 0.0118                                           | 0.0308                                                                      | 0.2407                                                                        |
| Bxdc2              | brix domain containing 2                                                               | NM_026396        | 0.117                                              | -0.341                                               | 0.0146                                           | 0.6247                                                                      | 0.0110                                                                        |
| C030017K20Rik      | NA                                                                                     | XM_001000858     | 0.284                                              | -0.323                                               | 0.0405                                           | 0.2485                                                                      | 0.1056                                                                        |
| C030019F02Rik      | RIKEN cDNA C030019F02 gene                                                             | NM_021426        | 0.385                                              | -0.135                                               | 0.0005                                           | 0.0060                                                                      | 0.0659                                                                        |
| C130026L21Rik      | RIKEN cDNA C130026L21 gene                                                             | AK160721         | 0.394                                              | -0.337                                               | 0.0359                                           | 0.1123                                                                      | 0.2059                                                                        |
| C1d                | NA                                                                                     | NM_020558        | 0.205                                              | -0.286                                               | 0.0098                                           | 0.2919                                                                      | 0.0210                                                                        |

**Table S1.** Continued.

| <b>Gene Symbol</b> | <b>Gene Name</b>                                             | <b>Entrez ID</b> | <b>Fold Change<br/><i>MECP2</i>-Tg<br/>over WT</b> | <b>Fold Change<br/><i>Mecp2</i>-null<br/>over WT</b> | <b>FDR-<br/>adjusted<br/>p-value<br/>(Total)</b> | <b>FDR-<br/>adjusted<br/>p-value<br/>(<i>MECP2</i>-<br/>Tg over<br/>WT)</b> | <b>FDR-<br/>adjusted<br/>p-value<br/>(<i>Mecp2</i>-<br/>null over<br/>WT)</b> |
|--------------------|--------------------------------------------------------------|------------------|----------------------------------------------------|------------------------------------------------------|--------------------------------------------------|-----------------------------------------------------------------------------|-------------------------------------------------------------------------------|
| C1qb               | complement component 1, q subcomponent, beta polypeptide     | NM_009777        | 0.416                                              | -0.319                                               | 0.0040                                           | 0.0751                                                                      | 0.0393                                                                        |
| C1qc               | NA                                                           | BC069926         | 0.742                                              | -0.140                                               | 0.0123                                           | 0.0072                                                                      | 0.6501                                                                        |
| C1qdc1             | C1q domain containing 1                                      | XM_921237        | 0.214                                              | -0.260                                               | 0.0000                                           | 0.0086                                                                      | 0.0000                                                                        |
| C1qdc2             | NA                                                           | NM_026125        | 0.325                                              | -0.364                                               | 0.0000                                           | 0.0088                                                                      | 0.0011                                                                        |
| C1ql1              | complement component 1, q subcomponent-like 1                | NM_011795        | 0.572                                              | -0.347                                               | 0.0000                                           | 0.0016                                                                      | 0.0192                                                                        |
| C230086A09Rik      | RIKEN cDNA C230086A09 gene                                   | XM_975827        | 0.138                                              | -0.339                                               | 0.0004                                           | 0.4277                                                                      | 0.0005                                                                        |
| C230094A16Rik      | RIKEN cDNA C230094A16 gene                                   | NM_146016        | 0.200                                              | -0.203                                               | 0.0000                                           | 0.0000                                                                      | 0.0000                                                                        |
| C330001K17Rik      | RIKEN cDNA C330001K17 gene                                   | NM_029939        | 0.371                                              | -0.179                                               | 0.0000                                           | 0.0004                                                                      | 0.0716                                                                        |
| C330011K17Rik      | RIKEN cDNA C330011K17 gene                                   | XM_976236        | 0.339                                              | -0.334                                               | 0.0051                                           | 0.1986                                                                      | 0.0173                                                                        |
| C330016O10Rik      | RIKEN cDNA C330016O10 gene                                   | NM_145974        | 0.137                                              | -0.321                                               | 0.0300                                           | 0.5709                                                                      | 0.0271                                                                        |
| C430004E15Rik      | RIKEN cDNA C430004E15 gene                                   | NM_175286        | 0.434                                              | -0.162                                               | 0.0173                                           | 0.0214                                                                      | 0.4227                                                                        |
| C4b                | NA                                                           | XM_973068        | 0.403                                              | -0.023                                               | 0.0000                                           | 0.0000                                                                      | 0.8148                                                                        |
| C530028O21Rik      | RIKEN cDNA C530028O21 gene                                   | NM_175696        | 0.279                                              | -0.199                                               | 0.0023                                           | 0.1192                                                                      | 0.0136                                                                        |
| C630004H02Rik      | RIKEN cDNA C630004H02 gene                                   | NM_175454        | 0.298                                              | -0.134                                               | 0.0000                                           | 0.0000                                                                      | 0.0003                                                                        |
| C77370             | expressed sequence C77370                                    | NM_001077354     | 0.585                                              | -0.539                                               | 0.0069                                           | 0.0891                                                                      | 0.0563                                                                        |
| Cab39              | calcium binding protein 39                                   | NM_133781        | 0.111                                              | -0.354                                               | 0.0058                                           | 0.5336                                                                      | 0.0053                                                                        |
| Cacna1g            | calcium channel, voltage-dependent, T type, alpha 1G subunit | BC057399         | 0.496                                              | -0.286                                               | 0.0000                                           | 0.0000                                                                      | 0.0000                                                                        |
| Cacnb1             | calcium channel, voltage-dependent, beta 1 subunit           | NM_145121        | 0.426                                              | -0.262                                               | 0.0000                                           | 0.0000                                                                      | 0.0000                                                                        |
| Cacnb3             | calcium channel, voltage-dependent, beta 3 subunit           | BC055926         | 0.555                                              | -0.222                                               | 0.0000                                           | 0.0000                                                                      | 0.0000                                                                        |
| Cacybp             | calyculin binding protein                                    | NM_009786        | 0.250                                              | -0.232                                               | 0.0053                                           | 0.1459                                                                      | 0.0257                                                                        |



**Table S1.** Continued.

| <b>Gene Symbol</b> | <b>Gene Name</b>                                                                 | <b>Entrez ID</b> | <b>Fold Change<br/><i>MECP2</i>-Tg<br/>over WT</b> | <b>Fold Change<br/><i>Mecp2</i>-null<br/>over WT</b> | <b>FDR-<br/>adjusted<br/>p-value<br/>(Total)</b> | <b>FDR-<br/>adjusted<br/>p-value<br/>(<i>MECP2</i>-<br/>Tg over<br/>WT)</b> | <b>FDR-<br/>adjusted<br/>p-value<br/>(<i>Mecp2</i>-<br/>null over<br/>WT)</b> |
|--------------------|----------------------------------------------------------------------------------|------------------|----------------------------------------------------|------------------------------------------------------|--------------------------------------------------|-----------------------------------------------------------------------------|-------------------------------------------------------------------------------|
| Cad                | carbamoyl-phosphate synthetase 2, aspartate transcarbamylase, and dihydroorotase | NM_023525        | 0.280                                              | -0.148                                               | 0.0000                                           | 0.0000                                                                      | 0.0000                                                                        |
| Calb1              | calbindin-28K                                                                    | NM_009788        | 0.698                                              | -0.451                                               | 0.0000                                           | 0.0000                                                                      | 0.0000                                                                        |
| Calb2              | calbindin 2                                                                      | NM_007586        | 0.269                                              | -0.288                                               | 0.0044                                           | 0.0957                                                                      | 0.0340                                                                        |
| Calcr1             | calcitonin receptor-like                                                         | NM_018782        | 0.237                                              | -0.194                                               | 0.0021                                           | 0.0311                                                                      | 0.0513                                                                        |
| Camk1              | calcium/calmodulin-dependent protein kinase I                                    | BC042494         | 0.217                                              | -0.380                                               | 0.0002                                           | 0.3886                                                                      | 0.0002                                                                        |
| Camkk2             | calcium/calmodulin-dependent protein kinase kinase 2, beta                       | AK044660         | 0.301                                              | -0.101                                               | 0.0000                                           | 0.0000                                                                      | 0.0684                                                                        |
| Camkv              | CaM kinase-like vesicle-associated                                               | NM_145621        | 0.388                                              | -0.065                                               | 0.0000                                           | 0.0000                                                                      | 0.3160                                                                        |
| Caml               | calcium modulating ligand                                                        | NM_007596        | 0.587                                              | -0.071                                               | 0.0127                                           | 0.0058                                                                      | 0.7443                                                                        |
| Cand2              | cullin-associated and neddylation-dissociated 2 (putative)                       | NM_025958        | 0.347                                              | -0.191                                               | 0.0000                                           | 0.0004                                                                      | 0.0085                                                                        |
| Cant1              | calcium activated nucleotidase 1                                                 | NM_001025617     | 0.265                                              | -0.187                                               | 0.0012                                           | 0.0058                                                                      | 0.1330                                                                        |
| Capn10             | calpain 10                                                                       | NM_011796        | 0.302                                              | -0.106                                               | 0.0000                                           | 0.0000                                                                      | 0.1253                                                                        |
| Capn7              | calpain 7                                                                        | NM_009796        | 0.226                                              | -0.176                                               | 0.0000                                           | 0.0006                                                                      | 0.0001                                                                        |
| Capns1             | calpain, small subunit 1                                                         | AK132819         | 0.315                                              | -0.096                                               | 0.0000                                           | 0.0000                                                                      | 0.0267                                                                        |
| Car10              | carbonic anhydrase 10                                                            | NM_028296        | 0.198                                              | -0.264                                               | 0.0000                                           | 0.0199                                                                      | 0.0001                                                                        |
| Car11              | carbonic anhydrase 11                                                            | AK140243         | 0.273                                              | -0.203                                               | 0.0000                                           | 0.0002                                                                      | 0.0000                                                                        |
| Car4               | carbonic anhydrase 4                                                             | NM_007607        | 0.413                                              | -0.536                                               | 0.0000                                           | 0.0001                                                                      | 0.0000                                                                        |
| Car5b              | carbonic anhydrase 5b, mitochondrial                                             | NM_019513        | 0.370                                              | -0.110                                               | 0.0032                                           | 0.0020                                                                      | 0.5939                                                                        |
| Caskin2            | cask-interacting protein 2                                                       | NM_080643        | 0.392                                              | -0.137                                               | 0.0000                                           | 0.0000                                                                      | 0.0202                                                                        |
| Casp8ap2           | caspase 8 associated protein 2                                                   | NM_011997        | 0.308                                              | -0.187                                               | 0.0026                                           | 0.0416                                                                      | 0.0480                                                                        |
| Cast               | calpastatin                                                                      | XM_990139        | 0.129                                              | -0.542                                               | 0.0000                                           | 0.1451                                                                      | 0.0000                                                                        |
| Cbln1              | cerebellin 1 precursor protein                                                   | NM_019626        | 0.214                                              | -0.288                                               | 0.0085                                           | 0.2093                                                                      | 0.0272                                                                        |

**Table S1.** Continued.

| <b>Gene Symbol</b> | <b>Gene Name</b>                | <b>Entrez ID</b> | <b>Fold Change<br/><i>MECP2</i>-Tg<br/>over WT</b> | <b>Fold Change<br/><i>Mecp2</i>-null<br/>over WT</b> | <b>FDR-<br/>adjusted<br/>p-value<br/>(Total)</b> | <b>FDR-<br/>adjusted<br/>p-value<br/>(<i>MECP2</i>-<br/>Tg over<br/>WT)</b> | <b>FDR-<br/>adjusted<br/>p-value<br/>(<i>Mecp2</i>-<br/>null over<br/>WT)</b> |
|--------------------|---------------------------------|------------------|----------------------------------------------------|------------------------------------------------------|--------------------------------------------------|-----------------------------------------------------------------------------|-------------------------------------------------------------------------------|
| Cbln2              | cerebellin 2 precursor protein  | NM_172633        | 0.265                                              | -0.284                                               | 0.0003                                           | 0.0386                                                                      | 0.0066                                                                        |
| Cbwd1              | COBW domain containing 1        | NM_146097        | 0.197                                              | -0.229                                               | 0.0062                                           | 0.2342                                                                      | 0.0174                                                                        |
| Ccbl1              | cysteine conjugate-beta lyase 1 | AK039609         | 0.332                                              | -0.100                                               | 0.0075                                           | 0.0124                                                                      | 0.3326                                                                        |
| Ccbl2              | cysteine conjugate-beta lyase 2 | AK084398         | 0.321                                              | -0.256                                               | 0.0003                                           | 0.0091                                                                      | 0.0247                                                                        |
| Ccdc106            | NA                              | NM_146178        | 0.390                                              | -0.302                                               | 0.0001                                           | 0.0403                                                                      | 0.0022                                                                        |
| Ccdc116            | NA                              | NM_029779        | 0.425                                              | -0.216                                               | 0.0001                                           | 0.0003                                                                      | 0.1213                                                                        |
| Ccdc28b            | NA                              | AK031278         | 0.326                                              | -0.284                                               | 0.0139                                           | 0.1866                                                                      | 0.0508                                                                        |
| Ccdc39             | NA                              | NM_026222        | 0.213                                              | -0.265                                               | 0.0000                                           | 0.0310                                                                      | 0.0000                                                                        |
| Ccdc45             | NA                              | NM_177088        | 0.399                                              | -0.154                                               | 0.0000                                           | 0.0000                                                                      | 0.0287                                                                        |
| Ccdc49             | NA                              | BC053447         | 0.250                                              | -0.206                                               | 0.0369                                           | 0.1391                                                                      | 0.1732                                                                        |
| Ccdc5              | coiled-coil domain containing 5 | NM_146089        | 0.188                                              | -0.387                                               | 0.0001                                           | 0.1167                                                                      | 0.0008                                                                        |
| Ccdc53             | NA                              | AK028599         | 0.464                                              | -0.320                                               | 0.0000                                           | 0.0059                                                                      | 0.0072                                                                        |
| Ccdc65             | NA                              | AK135780         | 0.148                                              | -0.299                                               | 0.0012                                           | 0.1744                                                                      | 0.0045                                                                        |
| Ccdc77             | NA                              | AK014237         | 0.298                                              | -0.152                                               | 0.0333                                           | 0.0632                                                                      | 0.3184                                                                        |
| Ccdc79             | NA                              | NM_180958        | 0.386                                              | -0.289                                               | 0.0000                                           | 0.0034                                                                      | 0.0106                                                                        |
| Ccdc84             | NA                              | NM_201372        | 0.280                                              | -0.195                                               | 0.0135                                           | 0.0737                                                                      | 0.1276                                                                        |
| Ccdc85a            | NA                              | BC020949         | 0.504                                              | -0.320                                               | 0.0000                                           | 0.0000                                                                      | 0.0000                                                                        |
| Ccdc90b            | NA                              | BC034878         | 0.694                                              | -0.264                                               | 0.0004                                           | 0.0015                                                                      | 0.1695                                                                        |
| Ccdc98             | NA                              | NM_172405        | 0.278                                              | -0.217                                               | 0.0050                                           | 0.0612                                                                      | 0.0606                                                                        |
| Ccl3               | chemokine (C-C motif) ligand 3  | NM_011337        | 0.510                                              | -0.405                                               | 0.0354                                           | 0.0830                                                                      | 0.2673                                                                        |
| Ccne1              | cyclin E1                       | NM_007633        | 0.282                                              | -0.174                                               | 0.0000                                           | 0.0030                                                                      | 0.0090                                                                        |
| Ccne2              | cyclin E2                       | NM_009830        | 0.596                                              | -0.288                                               | 0.0000                                           | 0.0002                                                                      | 0.0722                                                                        |
| Ccnf               | cyclin F                        | NM_007634        | 0.304                                              | -0.123                                               | 0.0000                                           | 0.0000                                                                      | 0.2077                                                                        |
| Ccng2              | cyclin G2                       | NM_007635        | 0.419                                              | -0.041                                               | 0.0009                                           | 0.0003                                                                      | 0.8183                                                                        |
| Ccnh               | cyclin H                        | AK137849         | 0.218                                              | -0.192                                               | 0.0122                                           | 0.1141                                                                      | 0.0752                                                                        |
| Ccnj               | cyclin J                        | NM_172839        | 0.291                                              | -0.176                                               | 0.0109                                           | 0.0384                                                                      | 0.1871                                                                        |
| Ccrk               | cell cycle related kinase       | NM_053180        | 0.609                                              | -0.158                                               | 0.0000                                           | 0.0000                                                                      | 0.1681                                                                        |
| Cd151              | CD151 antigen                   | NM_009842        | 0.332                                              | -0.236                                               | 0.0000                                           | 0.0018                                                                      | 0.0014                                                                        |
| Cd164              | CD164 antigen                   | NM_016898        | 0.293                                              | -0.114                                               | 0.0000                                           | 0.0000                                                                      | 0.2900                                                                        |
| Cd200              | CD200 antigen                   | BC019172         | 0.175                                              | -0.273                                               | 0.0000                                           | 0.0323                                                                      | 0.0006                                                                        |
| Cd36               | CD36 antigen                    | AK150648         | 0.766                                              | -0.597                                               | 0.0000                                           | 0.0000                                                                      | 0.0000                                                                        |
| Cd46               | NA                              | NM_010778        | 0.139                                              | -0.368                                               | 0.0195                                           | 0.6139                                                                      | 0.0153                                                                        |
| Cd53               | CD53 antigen                    | AK088232         | 0.389                                              | -0.076                                               | 0.0000                                           | 0.0000                                                                      | 0.7381                                                                        |

**Table S1.** Continued.

| <b>Gene Symbol</b> | <b>Gene Name</b>                                                                           | <b>Entrez ID</b> | <b>Fold Change<br/><i>MECP2</i>-Tg<br/>over WT</b> | <b>Fold Change<br/><i>Mecp2</i>-null<br/>over WT</b> | <b>FDR-<br/>adjusted<br/>p-value<br/>(Total)</b> | <b>FDR-<br/>adjusted<br/>p-value<br/>(<i>MECP2</i>-<br/>Tg over<br/>WT)</b> | <b>FDR-<br/>adjusted<br/>p-value<br/>(<i>Mecp2</i>-<br/>null over<br/>WT)</b> |
|--------------------|--------------------------------------------------------------------------------------------|------------------|----------------------------------------------------|------------------------------------------------------|--------------------------------------------------|-----------------------------------------------------------------------------|-------------------------------------------------------------------------------|
| Cd55               | NA                                                                                         | NM_010016        | 0.313                                              | -0.426                                               | 0.0001                                           | 0.0242                                                                      | 0.0024                                                                        |
| Cd63               | NA                                                                                         | NM_001042580     | 0.639                                              | -0.346                                               | 0.0000                                           | 0.0000                                                                      | 0.0027                                                                        |
| Cd68               | CD68 antigen                                                                               | NM_009853        | 0.254                                              | -0.352                                               | 0.0055                                           | 0.3014                                                                      | 0.0112                                                                        |
| Cd74               | NA                                                                                         | NM_010545        | 0.728                                              | -0.426                                               | 0.0000                                           | 0.0000                                                                      | 0.0025                                                                        |
| Cda                | cytidine deaminase                                                                         | NM_028176        | 0.273                                              | -0.574                                               | 0.0002                                           | 0.1156                                                                      | 0.0015                                                                        |
| Cdc16              | CDC16 cell division<br>cycle 16 homolog (S.<br><i>cerevisiae</i> )                         | NM_027276        | 0.367                                              | -0.155                                               | 0.0000                                           | 0.0000                                                                      | 0.0025                                                                        |
| Cdc25a             | cell division cycle 25<br>homolog A (S.<br><i>cerevisiae</i> )                             | NM_007658        | 0.283                                              | -0.231                                               | 0.0000                                           | 0.0012                                                                      | 0.0064                                                                        |
| Cdc42se1           | CDC42 small<br>effector 1                                                                  | NM_172395        | 0.373                                              | -0.252                                               | 0.0000                                           | 0.0007                                                                      | 0.0394                                                                        |
| Cdh23              | cadherin 23<br>(otocadherin)                                                               | AK134635         | 0.325                                              | -0.386                                               | 0.0000                                           | 0.0000                                                                      | 0.0000                                                                        |
| Cdh24              | NA                                                                                         | NM_023190        | 0.274                                              | -0.287                                               | 0.0000                                           | 0.0034                                                                      | 0.0056                                                                        |
| Cdh7               | cadherin 7, type 2                                                                         | NM_172853        | 0.345                                              | -0.363                                               | 0.0000                                           | 0.0002                                                                      | 0.0001                                                                        |
| Cdk2ap1            | CDK2 (cyclin-<br>dependent kinase 2)-<br>associated protein 1                              | AK004852         | 0.290                                              | -0.154                                               | 0.0013                                           | 0.0033                                                                      | 0.2256                                                                        |
| Cdk5               | cyclin-dependent<br>kinase 5                                                               | NM_007668        | 0.330                                              | -0.131                                               | 0.0000                                           | 0.0000                                                                      | 0.0015                                                                        |
| Cdk7               | cyclin-dependent<br>kinase 7 (homolog of<br><i>Xenopus</i> MO15 cdk-<br>activating kinase) | NM_009874        | 0.298                                              | -0.228                                               | 0.0000                                           | 0.0012                                                                      | 0.0061                                                                        |
| Cdk9               | cyclin-dependent<br>kinase 9 (CDC2-<br>related kinase)                                     | AK155733         | 0.324                                              | -0.196                                               | 0.0001                                           | 0.0128                                                                      | 0.0075                                                                        |
| Cdkn2d             | cyclin-dependent<br>kinase inhibitor 2D<br>(p19, inhibits CDK4)                            | AK140808         | 0.755                                              | -0.288                                               | 0.0177                                           | 0.0734                                                                      | 0.1622                                                                        |
| Cdo1               | cysteine dioxygenase<br>1, cytosolic                                                       | NM_033037        | 0.246                                              | -0.242                                               | 0.0253                                           | 0.1131                                                                      | 0.1496                                                                        |
| Cecam1             | cerebral endothelial<br>cell adhesion<br>molecule 1                                        | NM_207298        | 0.280                                              | -0.377                                               | 0.0000                                           | 0.0030                                                                      | 0.0017                                                                        |
| Cenpc1             | centromere<br>autoantigen C1                                                               | NM_007683        | 0.227                                              | -0.256                                               | 0.0001                                           | 0.0322                                                                      | 0.0018                                                                        |
| Centg1             | centaurin, gamma 1                                                                         | XM_989454        | 0.448                                              | -0.118                                               | 0.0000                                           | 0.0000                                                                      | 0.1061                                                                        |
| Cep27              | NA                                                                                         | AK007106         | 0.350                                              | -0.209                                               | 0.0117                                           | 0.0220                                                                      | 0.3107                                                                        |
| Cep78              | NA                                                                                         | AK050870         | 0.234                                              | -0.194                                               | 0.0003                                           | 0.0036                                                                      | 0.0667                                                                        |

**Table S1.** Continued.

| <b>Gene Symbol</b> | <b>Gene Name</b>                                                              | <b>Entrez ID</b> | <b>Fold Change<br/><i>MECP2</i>-Tg<br/>over WT</b> | <b>Fold Change<br/><i>Mecp2</i>-null<br/>over WT</b> | <b>FDR-<br/>adjusted<br/>p-value<br/>(Total)</b> | <b>FDR-<br/>adjusted<br/>p-value<br/>(<i>MECP2</i>-<br/>Tg over<br/>WT)</b> | <b>FDR-<br/>adjusted<br/>p-value<br/>(<i>Mecp2</i>-<br/>null over<br/>WT)</b> |
|--------------------|-------------------------------------------------------------------------------|------------------|----------------------------------------------------|------------------------------------------------------|--------------------------------------------------|-----------------------------------------------------------------------------|-------------------------------------------------------------------------------|
| Cept1              | choline/ethanolamine phosphotransferase 1                                     | NM_133869        | 0.338                                              | -0.161                                               | 0.0000                                           | 0.0007                                                                      | 0.0043                                                                        |
| Cetn2              | centrin 2                                                                     | AK151033         | 0.313                                              | -0.253                                               | 0.0105                                           | 0.0515                                                                      | 0.1415                                                                        |
| Cftr               | cystic fibrosis transmembrane conductance regulator homolog                   | NM_021050        | 0.588                                              | -0.218                                               | 0.0000                                           | 0.0000                                                                      | 0.0438                                                                        |
| Cgref1             | cell growth regulator with EF hand domain 1                                   | XM_181420        | 0.182                                              | -0.233                                               | 0.0476                                           | 0.2099                                                                      | 0.1460                                                                        |
| Chd3               | chromodomain helicase DNA binding protein 3                                   | XM_484041        | 0.318                                              | -0.115                                               | 0.0000                                           | 0.0000                                                                      | 0.0000                                                                        |
| Chek1              | checkpoint kinase 1 homolog ( <i>S. pombe</i> )                               | NM_007691        | 0.273                                              | -0.246                                               | 0.0121                                           | 0.0925                                                                      | 0.0922                                                                        |
| Chia               | chitinase, acidic                                                             | NM_023186        | 0.280                                              | -0.308                                               | 0.0014                                           | 0.0195                                                                      | 0.0558                                                                        |
| Chic2              | cysteine-rich hydrophobic domain 2                                            | BC048435         | 0.311                                              | -0.168                                               | 0.0307                                           | 0.0585                                                                      | 0.3160                                                                        |
| Chka               | choline kinase alpha                                                          | AK005057         | 0.432                                              | -0.126                                               | 0.0000                                           | 0.0000                                                                      | 0.1692                                                                        |
| Chmp2b             | chromatin modifying protein 2B                                                | NM_026879        | 0.525                                              | -0.223                                               | 0.0102                                           | 0.0796                                                                      | 0.0908                                                                        |
| Chmp5              | chromatin modifying protein 5                                                 | BC053709         | 0.373                                              | -0.140                                               | 0.0000                                           | 0.0000                                                                      | 0.0204                                                                        |
| Chodl              | chondrolectin                                                                 | AK031063         | 0.535                                              | -0.346                                               | 0.0001                                           | 0.0029                                                                      | 0.0222                                                                        |
| Chordc1            | cysteine and histidine-rich domain (CHORD)-containing, zinc-binding protein 1 | NM_025844        | 0.405                                              | -0.255                                               | 0.0000                                           | 0.0000                                                                      | 0.0079                                                                        |
| Chrd               | chordin                                                                       | AK220310         | 0.290                                              | -0.156                                               | 0.0000                                           | 0.0000                                                                      | 0.0373                                                                        |
| Chrm4              | cholinergic receptor, muscarinic 4                                            | NM_007699        | 0.374                                              | -0.643                                               | 0.0433                                           | 0.2300                                                                      | 0.1220                                                                        |
| Chrna6             | cholinergic receptor, nicotinic, alpha polypeptide 6                          | NM_021369        | 0.344                                              | -0.952                                               | 0.0001                                           | 0.0934                                                                      | 0.0005                                                                        |
| Chrn3              | cholinergic receptor, nicotinic, beta polypeptide 3                           | NM_173212        | 0.309                                              | -0.288                                               | 0.0008                                           | 0.0555                                                                      | 0.0115                                                                        |
| Chuk               | conserved helix-loop-helix ubiquitous kinase                                  | NM_007700        | 0.276                                              | -0.201                                               | 0.0000                                           | 0.0001                                                                      | 0.0002                                                                        |
| Cib1               | calcium and integrin binding 1 (calmyrin)                                     | NM_011870        | 0.292                                              | -0.185                                               | 0.0099                                           | 0.0362                                                                      | 0.1825                                                                        |

**Table S1.** Continued.

| <b>Gene Symbol</b> | <b>Gene Name</b>                                                  | <b>Entrez ID</b> | <b>Fold Change<br/><i>MECP2</i>-Tg<br/>over WT</b> | <b>Fold Change<br/><i>Mecp2</i>-null<br/>over WT</b> | <b>FDR-<br/>adjusted<br/>p-value<br/>(Total)</b> | <b>FDR-<br/>adjusted<br/>p-value<br/>(<i>MECP2</i>-<br/>Tg over<br/>WT)</b> | <b>FDR-<br/>adjusted<br/>p-value<br/>(<i>Mecp2</i>-<br/>null over<br/>WT)</b> |
|--------------------|-------------------------------------------------------------------|------------------|----------------------------------------------------|------------------------------------------------------|--------------------------------------------------|-----------------------------------------------------------------------------|-------------------------------------------------------------------------------|
| Cic                | capicua homolog<br>(Drosophila)                                   | NM_027882        | 0.392                                              | -0.111                                               | 0.0000                                           | 0.0000                                                                      | 0.0052                                                                        |
| Ckmt1              | creatine kinase,<br>mitochondrial 1,<br>ubiquitous                | AK018487         | 0.431                                              | -0.209                                               | 0.0000                                           | 0.0000                                                                      | 0.0029                                                                        |
| Cks1b              | CDC28 protein<br>kinase 1b                                        | AK033161         | 0.465                                              | -0.351                                               | 0.0391                                           | 0.1000                                                                      | 0.2489                                                                        |
| Clcn2              | chloride channel 2                                                | AK141656         | 0.467                                              | -0.268                                               | 0.0000                                           | 0.0000                                                                      | 0.0000                                                                        |
| Cln8               | ceroid-lipofuscinosis,<br>neuronal 8                              | BC021625         | 0.338                                              | -0.081                                               | 0.0344                                           | 0.0220                                                                      | 0.6575                                                                        |
| Clptm11            | NA                                                                | NM_146047        | 0.310                                              | -0.147                                               | 0.0000                                           | 0.0001                                                                      | 0.0059                                                                        |
| Cmas               | cytidine<br>monophospho-N-<br>acetylneuraminic<br>acid synthetase | NM_009908        | 0.323                                              | -0.108                                               | 0.0001                                           | 0.0007                                                                      | 0.0522                                                                        |
| Cmb1               | NA                                                                | NM_181588        | 0.473                                              | -0.195                                               | 0.0163                                           | 0.0251                                                                      | 0.3634                                                                        |
| Cml5               | camello-like 5                                                    | NM_023493        | 0.444                                              | -0.600                                               | 0.0177                                           | 0.3352                                                                      | 0.0323                                                                        |
| Cmtm8              | NA                                                                | NM_027294        | 0.377                                              | -0.097                                               | 0.0071                                           | 0.0048                                                                      | 0.5905                                                                        |
| Cnih2              | cornichon homolog 2<br>(Drosophila)                               | XM_975558        | 0.396                                              | -0.150                                               | 0.0000                                           | 0.0000                                                                      | 0.1330                                                                        |
| Cnot6l             | CCR4-NOT<br>transcription<br>complex, subunit 6-<br>like          | NM_144910        | 0.243                                              | -0.190                                               | 0.0000                                           | 0.0001                                                                      | 0.0000                                                                        |
| Cnp1               | cyclic nucleotide<br>phosphodiesterase 1                          | AK161541         | 0.297                                              | -0.184                                               | 0.0021                                           | 0.0067                                                                      | 0.1929                                                                        |
| Cntnap3            | NA                                                                | XM_989262        | 0.635                                              | -0.599                                               | 0.0000                                           | 0.0000                                                                      | 0.0000                                                                        |
| Cntnap5c           | NA                                                                | XM_975476        | 0.145                                              | -0.413                                               | 0.0000                                           | 0.1588                                                                      | 0.0000                                                                        |
| Coasy              | Coenzyme A<br>synthase                                            | NM_027896        | 0.445                                              | -0.197                                               | 0.0075                                           | 0.0719                                                                      | 0.0756                                                                        |
| Coch               | coagulation factor C<br>homolog (Limulus<br>polyphemus)           | NM_007728        | 0.093                                              | -0.432                                               | 0.0007                                           | 0.6086                                                                      | 0.0005                                                                        |
| Cog4               | component of<br>oligomeric golgi<br>complex 4                     | NM_133973        | 0.328                                              | -0.152                                               | 0.0000                                           | 0.0000                                                                      | 0.0004                                                                        |
| Cog7               | component of<br>oligomeric golgi<br>complex 7                     | AK163143         | 0.302                                              | -0.109                                               | 0.0000                                           | 0.0000                                                                      | 0.0283                                                                        |
| Coll2a1            | procollagen, type<br>XII, alpha 1                                 | AK076278         | 0.218                                              | -0.455                                               | 0.0000                                           | 0.0000                                                                      | 0.0000                                                                        |
| Colec12            | collectin sub-family<br>member 12                                 | NM_130449        | 0.473                                              | -0.122                                               | 0.0000                                           | 0.0000                                                                      | 0.2747                                                                        |

**Table S1.** Continued.

| <b>Gene Symbol</b> | <b>Gene Name</b>                                                                                           | <b>Entrez ID</b> | <b>Fold Change<br/><i>MECP2</i>-Tg<br/>over WT</b> | <b>Fold Change<br/><i>Mecp2</i>-null<br/>over WT</b> | <b>FDR-<br/>adjusted<br/>p-value<br/>(Total)</b> | <b>FDR-<br/>adjusted<br/>p-value<br/>(<i>MECP2</i>-<br/>Tg over<br/>WT)</b> | <b>FDR-<br/>adjusted<br/>p-value<br/>(<i>Mecp2</i>-<br/>null over<br/>WT)</b> |
|--------------------|------------------------------------------------------------------------------------------------------------|------------------|----------------------------------------------------|------------------------------------------------------|--------------------------------------------------|-----------------------------------------------------------------------------|-------------------------------------------------------------------------------|
| Comt               | catechol-O-<br>methyltransferase                                                                           | AK148311         | 0.394                                              | -0.182                                               | 0.0004                                           | 0.0015                                                                      | 0.1626                                                                        |
| Copb2              | coatamer protein<br>complex, subunit<br>beta 2 (beta prime)                                                | NM_015827        | 0.279                                              | -0.170                                               | 0.0000                                           | 0.0000                                                                      | 0.0000                                                                        |
| Cops5              | COP9 (constitutive<br>photomorphogenic)<br>homolog, subunit 5<br>( <i>Arabidopsis</i><br><i>thaliana</i> ) | NM_013715        | 0.736                                              | -0.191                                               | 0.0000                                           | 0.0000                                                                      | 0.0243                                                                        |
| Copz2              | coatamer protein<br>complex, subunit zeta<br>2                                                             | NM_019877        | 0.293                                              | -0.204                                               | 0.0054                                           | 0.0682                                                                      | 0.0579                                                                        |
| Coq4               | coenzyme Q4<br>homolog (yeast)                                                                             | BC039570         | 0.349                                              | -0.097                                               | 0.0010                                           | 0.0010                                                                      | 0.4355                                                                        |
| Coro1a             | coronin, actin<br>binding protein 1A                                                                       | AK037801         | 0.255                                              | -0.309                                               | 0.0000                                           | 0.0010                                                                      | 0.0000                                                                        |
| Coro2a             | coronin, actin<br>binding protein 2A                                                                       | BC068206         | 0.241                                              | -0.289                                               | 0.0000                                           | 0.0000                                                                      | 0.0001                                                                        |
| Coro7              | coronin 7                                                                                                  | AK041000         | 0.332                                              | -0.130                                               | 0.0000                                           | 0.0000                                                                      | 0.0004                                                                        |
| Coval              | cytosolic ovarian<br>carcinoma antigen 1                                                                   | AK133956         | 0.211                                              | -0.197                                               | 0.0064                                           | 0.0728                                                                      | 0.0646                                                                        |
| Cox5a              | cytochrome c<br>oxidase, subunit Va                                                                        | NM_007747        | 0.557                                              | -0.205                                               | 0.0097                                           | 0.1868                                                                      | 0.0357                                                                        |
| Cox6b1             | cytochrome c<br>oxidase, subunit VIb<br>polypeptide 1                                                      | BC024343         | 0.326                                              | -0.300                                               | 0.0128                                           | 0.4450                                                                      | 0.0160                                                                        |
| Cox6b2             | cytochrome c oxidase<br>subunit VIb<br>polypeptide 2                                                       | NM_183406        | 0.621                                              | -0.426                                               | 0.0066                                           | 0.0266                                                                      | 0.1659                                                                        |
| Cp                 | ceruloplasmin                                                                                              | NM_001042611     | 0.338                                              | -0.315                                               | 0.0000                                           | 0.0000                                                                      | 0.0000                                                                        |
| Cpb1               | carboxypeptidase B1<br>(tissue)                                                                            | NM_029706        | 0.470                                              | -0.247                                               | 0.0004                                           | 0.0030                                                                      | 0.0875                                                                        |
| Cpne6              | copine VI                                                                                                  | NM_009947        | 0.375                                              | -0.315                                               | 0.0000                                           | 0.0000                                                                      | 0.0000                                                                        |
| Cpne7              | copine VII                                                                                                 | NM_170684        | 0.352                                              | -0.262                                               | 0.0000                                           | 0.0000                                                                      | 0.0000                                                                        |
| Cpne9              | NA                                                                                                         | AK047431         | 0.103                                              | -0.320                                               | 0.0000                                           | 0.0157                                                                      | 0.0000                                                                        |
| Cpsf1              | cleavage and<br>polyadenylation<br>specific factor 1                                                       | NM_053193        | 0.314                                              | -0.109                                               | 0.0000                                           | 0.0000                                                                      | 0.0007                                                                        |
| Cpsf2              | cleavage and<br>polyadenylation<br>specific factor 2                                                       | NM_016856        | 0.247                                              | -0.154                                               | 0.0000                                           | 0.0000                                                                      | 0.0029                                                                        |

**Table S1.** Continued.

| <b>Gene Symbol</b> | <b>Gene Name</b>                                                | <b>Entrez ID</b> | <b>Fold Change<br/><i>MECP2</i>-Tg<br/>over WT</b> | <b>Fold Change<br/><i>Mecp2</i>-null<br/>over WT</b> | <b>FDR-<br/>adjusted<br/>p-value<br/>(Total)</b> | <b>FDR-<br/>adjusted<br/>p-value<br/>(<i>MECP2</i>-<br/>Tg over<br/>WT)</b> | <b>FDR-<br/>adjusted<br/>p-value<br/>(<i>Mecp2</i>-<br/>null over<br/>WT)</b> |
|--------------------|-----------------------------------------------------------------|------------------|----------------------------------------------------|------------------------------------------------------|--------------------------------------------------|-----------------------------------------------------------------------------|-------------------------------------------------------------------------------|
| Cpsf4              | cleavage and polyadenylation specific factor 4                  | XM_001004468     | 0.273                                              | -0.234                                               | 0.0023                                           | 0.0517                                                                      | 0.0346                                                                        |
| Cpt1c              | carnitine palmitoyltransferase 1c                               | AK134246         | 0.303                                              | -0.140                                               | 0.0000                                           | 0.0000                                                                      | 0.0001                                                                        |
| Cpxm2              | carboxypeptidase X 2 (M14 family)                               | AK038874         | 0.648                                              | -0.207                                               | 0.0000                                           | 0.0000                                                                      | 0.0629                                                                        |
| Creb1              | cAMP responsive element binding protein 1                       | U46027           | 0.262                                              | -0.180                                               | 0.0000                                           | 0.0003                                                                      | 0.0118                                                                        |
| Creb3              | cAMP responsive element binding protein 3                       | NM_013497        | 0.364                                              | -0.197                                               | 0.0000                                           | 0.0000                                                                      | 0.0002                                                                        |
| Creld2             | NA                                                              | NM_145478        | 0.319                                              | -0.177                                               | 0.0100                                           | 0.0322                                                                      | 0.2020                                                                        |
| Crh                | corticotropin releasing hormone                                 | NM_205769        | 1.020                                              | -0.521                                               | 0.0186                                           | 0.0430                                                                      | 0.2683                                                                        |
| Crhbp              | corticotropin releasing hormone binding protein                 | AK157912         | 0.269                                              | -0.518                                               | 0.0000                                           | 0.1160                                                                      | 0.0001                                                                        |
| Crip2              | cysteine rich protein 2                                         | NM_024223        | 0.691                                              | -0.370                                               | 0.0000                                           | 0.0000                                                                      | 0.0002                                                                        |
| Crls1              | NA                                                              | NM_025646        | 0.264                                              | -0.154                                               | 0.0055                                           | 0.0095                                                                      | 0.3188                                                                        |
| Crsp9              | cofactor required for Sp1 transcriptional activation, subunit 9 | NM_025426        | 0.226                                              | -0.267                                               | 0.0192                                           | 0.1686                                                                      | 0.0768                                                                        |
| Crtap              | cartilage associated protein                                    | NM_019922        | 0.400                                              | -0.107                                               | 0.0248                                           | 0.0275                                                                      | 0.4638                                                                        |
| Csdc2              | NA                                                              | NM_145473        | 0.171                                              | -0.248                                               | 0.0378                                           | 0.3391                                                                      | 0.0685                                                                        |
| Csk                | c-src tyrosine kinase                                           | BC095962         | 0.409                                              | -0.093                                               | 0.0000                                           | 0.0000                                                                      | 0.2644                                                                        |
| Csnk2b             | casein kinase II, beta subunit                                  | BC003775         | 0.344                                              | -0.118                                               | 0.0007                                           | 0.0034                                                                      | 0.1273                                                                        |
| Cspg2              | chondroitin sulfate proteoglycan 2                              | XM_488510        | 0.586                                              | -0.451                                               | 0.0000                                           | 0.0000                                                                      | 0.0000                                                                        |
| Cspg4              | chondroitin sulfate proteoglycan 4                              | AK052394         | 0.251                                              | -0.184                                               | 0.0001                                           | 0.0021                                                                      | 0.0424                                                                        |
| Ctps               | cytidine 5'-triphosphate synthase                               | NM_016748        | 0.447                                              | -0.201                                               | 0.0000                                           | 0.0000                                                                      | 0.0018                                                                        |
| Ctsc               | cathepsin C                                                     | NM_009982        | 0.427                                              | -0.134                                               | 0.0044                                           | 0.0040                                                                      | 0.4803                                                                        |
| Ctsh               | cathepsin H                                                     | NM_007801        | 0.023                                              | -0.379                                               | 0.0030                                           | 0.9261                                                                      | 0.0010                                                                        |
| Ctsl               | cathepsin L                                                     | NM_009984        | 0.370                                              | -0.252                                               | 0.0000                                           | 0.0003                                                                      | 0.0030                                                                        |
| Ctso               | cathepsin O                                                     | NM_177662        | 0.401                                              | -0.074                                               | 0.0087                                           | 0.0113                                                                      | 0.3938                                                                        |
| Ctsz               | cathepsin Z                                                     | NM_022325        | 0.303                                              | -0.163                                               | 0.0019                                           | 0.0051                                                                      | 0.2238                                                                        |

**Table S1.** Continued.

| <b>Gene Symbol</b> | <b>Gene Name</b>                                       | <b>Entrez ID</b> | <b>Fold Change<br/><i>MECP2</i>-Tg<br/>over WT</b> | <b>Fold Change<br/><i>Mecp2</i>-null<br/>over WT</b> | <b>FDR-<br/>adjusted<br/>p-value<br/>(Total)</b> | <b>FDR-<br/>adjusted<br/>p-value<br/>(<i>MECP2</i>-<br/>Tg over<br/>WT)</b> | <b>FDR-<br/>adjusted<br/>p-value<br/>(<i>Mecp2</i>-<br/>null over<br/>WT)</b> |
|--------------------|--------------------------------------------------------|------------------|----------------------------------------------------|------------------------------------------------------|--------------------------------------------------|-----------------------------------------------------------------------------|-------------------------------------------------------------------------------|
| Cubn               | cubilin (intrinsic factor-cobalamin receptor)          | XM_993541        | 0.434                                              | -0.159                                               | 0.0000                                           | 0.0000                                                                      | 0.0044                                                                        |
| Cul4b              | cullin 4B                                              | AK170632         | 0.338                                              | -0.299                                               | 0.0000                                           | 0.0000                                                                      | 0.0000                                                                        |
| Cuta               | NA                                                     | AK007912         | 0.205                                              | -0.210                                               | 0.0002                                           | 0.0034                                                                      | 0.0399                                                                        |
| Cwf19l2            | CWF19-like 2, cell cycle control (S. pombe)            | NM_027545        | 0.388                                              | -0.200                                               | 0.0000                                           | 0.0000                                                                      | 0.0278                                                                        |
| Cxxc4              | CXXC finger 4                                          | BC067052         | 0.379                                              | -0.313                                               | 0.0007                                           | 0.0082                                                                      | 0.0627                                                                        |
| Cyb5               | cytochrome b-5                                         | NM_025797        | 0.276                                              | -0.140                                               | 0.0248                                           | 0.0351                                                                      | 0.3920                                                                        |
| Cyb561             | cytochrome b-561                                       | NM_007805        | 0.566                                              | -0.394                                               | 0.0000                                           | 0.0000                                                                      | 0.0000                                                                        |
| Cyb561d2           | cytochrome b-561 domain containing 2                   | AF131206         | 0.452                                              | -0.163                                               | 0.0277                                           | 0.0395                                                                      | 0.3905                                                                        |
| Cyb5r1             | NA                                                     | NM_028057        | 0.251                                              | -0.266                                               | 0.0000                                           | 0.0064                                                                      | 0.0006                                                                        |
| Cyp20a1            | cytochrome P450, family 20, subfamily A, polypeptide 1 | AK020848         | 0.338                                              | -0.200                                               | 0.0000                                           | 0.0000                                                                      | 0.0035                                                                        |
| Cyp27a1            | cytochrome P450, family 27, subfamily a, polypeptide 1 | NM_024264        | 0.317                                              | -0.394                                               | 0.0000                                           | 0.0095                                                                      | 0.0002                                                                        |
| Cyp2j9             | cytochrome P450, family 2, subfamily j, polypeptide 9  | AK037031         | 0.248                                              | -0.158                                               | 0.0290                                           | 0.1307                                                                      | 0.1472                                                                        |
| Cyp2s1             | cytochrome P450, family 2, subfamily s, polypeptide 1  | BC039770         | 0.274                                              | -0.238                                               | 0.0108                                           | 0.0392                                                                      | 0.1837                                                                        |
| Cyp4f14            | cytochrome P450, family 4, subfamily f, polypeptide 14 | NM_022434        | 0.234                                              | -0.424                                               | 0.0000                                           | 0.0471                                                                      | 0.0005                                                                        |
| Cyp4f15            | cytochrome P450, family 4, subfamily f, polypeptide 15 | NM_134127        | 0.385                                              | -0.463                                               | 0.0000                                           | 0.0021                                                                      | 0.0000                                                                        |
| Cyp4f16            | cytochrome P450, family 4, subfamily f, polypeptide 16 | XR_003830        | 0.411                                              | -0.221                                               | 0.0001                                           | 0.0011                                                                      | 0.0745                                                                        |
| Cyp4x1             | cytochrome P450, family 4, subfamily x, polypeptide 1  | NR_002138        | 0.194                                              | -0.292                                               | 0.0008                                           | 0.0353                                                                      | 0.0183                                                                        |
| D0H4S114           | DNA segment, human D4S114                              | AK051015         | 0.668                                              | -0.425                                               | 0.0000                                           | 0.0001                                                                      | 0.0010                                                                        |
| D0HXS9928E         | DNA segment, human DXS9928E                            | NM_138607        | 0.287                                              | -0.170                                               | 0.0308                                           | 0.1065                                                                      | 0.1888                                                                        |



**Table S1.** Continued.

| <b>Gene Symbol</b> | <b>Gene Name</b>                                               | <b>Entrez ID</b> | <b>Fold Change<br/><i>MECP2</i>-Tg<br/>over WT</b> | <b>Fold Change<br/><i>Mecp2</i>-null<br/>over WT</b> | <b>FDR-<br/>adjusted<br/>p-value<br/>(Total)</b> | <b>FDR-<br/>adjusted<br/>p-value<br/>(<i>MECP2</i>-<br/>Tg over<br/>WT)</b> | <b>FDR-<br/>adjusted<br/>p-value<br/>(<i>Mecp2</i>-<br/>null over<br/>WT)</b> |
|--------------------|----------------------------------------------------------------|------------------|----------------------------------------------------|------------------------------------------------------|--------------------------------------------------|-----------------------------------------------------------------------------|-------------------------------------------------------------------------------|
| D10Erttd322e       | DNA segment, Chr 10, ERATO Doi 322, expressed                  | NM_026065        | 0.223                                              | -0.354                                               | 0.0245                                           | 0.6187                                                                      | 0.0194                                                                        |
| D10Erttd438e       | DNA segment, Chr 10, ERATO Doi 438, expressed                  | XM_992169        | 0.251                                              | -0.160                                               | 0.0000                                           | 0.0002                                                                      | 0.0310                                                                        |
| D11Erttd18e        | DNA segment, Chr 11, ERATO Doi 18, expressed                   | NM_026740        | 0.428                                              | -0.323                                               | 0.0000                                           | 0.0004                                                                      | 0.0004                                                                        |
| D14Erttd581e       | DNA segment, Chr 14, ERATO Doi 581, expressed                  | AK015781         | 0.162                                              | -0.251                                               | 0.0000                                           | 0.0971                                                                      | 0.0002                                                                        |
| D16Bwg1494e        | DNA segment, Chr 16, Brigham & Women's Genetics 1494 expressed | BC058760         | 0.330                                              | -0.140                                               | 0.0257                                           | 0.2866                                                                      | 0.0566                                                                        |
| D16H22S680E        | DNA segment, Chr 16, human D22S680E, expressed                 | AK133778         | 0.374                                              | -0.230                                               | 0.0000                                           | 0.0000                                                                      | 0.0000                                                                        |
| D17Wsu104e         | DNA segment, Chr 17, Wayne State University 104, expressed     | NM_080837        | 0.624                                              | -0.262                                               | 0.0000                                           | 0.0000                                                                      | 0.0432                                                                        |
| D19Erttd721e       | DNA segment, Chr 19, ERATO Doi 721, expressed                  | AK015468         | 0.448                                              | -0.106                                               | 0.0001                                           | 0.0001                                                                      | 0.4424                                                                        |
| D1Bwg1363e         | DNA segment, Chr 1, Brigham & Women's Genetics 1363 expressed  | NM_001001566     | 0.278                                              | -0.158                                               | 0.0027                                           | 0.0420                                                                      | 0.0489                                                                        |
| D230017M19Rik      | NA                                                             | AK084284         | 0.463                                              | -0.186                                               | 0.0141                                           | 0.0255                                                                      | 0.3235                                                                        |
| D330017J20Rik      | RIKEN cDNA D330017J20 gene                                     | AK163706         | 0.363                                              | -0.071                                               | 0.0000                                           | 0.0000                                                                      | 0.4915                                                                        |
| D330027H18Rik      | RIKEN cDNA D330027H18 gene                                     | XM_913212        | 0.111                                              | -0.353                                               | 0.0067                                           | 0.1821                                                                      | 0.0253                                                                        |
| D3Ucla1            | DNA segment, Chr 3, University of California at Los Angeles 1  | NM_030685        | 0.335                                              | -0.205                                               | 0.0245                                           | 0.0544                                                                      | 0.2793                                                                        |
| D430041B17Rik      | NA                                                             | NM_172737        | 0.621                                              | -0.204                                               | 0.0000                                           | 0.0001                                                                      | 0.2061                                                                        |
| D630023F18Rik      | RIKEN cDNA D630023F18 gene                                     | AK164708         | 0.092                                              | -0.364                                               | 0.0026                                           | 0.6284                                                                      | 0.0018                                                                        |

**Table S1.** Continued.

| <b>Gene Symbol</b> | <b>Gene Name</b>                                                             | <b>Entrez ID</b> | <b>Fold Change<br/><i>MECP2</i>-Tg<br/>over WT</b> | <b>Fold Change<br/><i>Mecp2</i>-null<br/>over WT</b> | <b>FDR-<br/>adjusted<br/>p-value<br/>(Total)</b> | <b>FDR-<br/>adjusted<br/>p-value<br/>(<i>MECP2</i>-<br/>Tg over<br/>WT)</b> | <b>FDR-<br/>adjusted<br/>p-value<br/>(<i>Mecp2</i>-<br/>null over<br/>WT)</b> |
|--------------------|------------------------------------------------------------------------------|------------------|----------------------------------------------------|------------------------------------------------------|--------------------------------------------------|-----------------------------------------------------------------------------|-------------------------------------------------------------------------------|
| D730048A03Rik      | RIKEN cDNA<br>D730048A03 gene                                                | AK148615         | 0.361                                              | -0.943                                               | 0.0312                                           | 0.6182                                                                      | 0.0249                                                                        |
| D7Wsu128e          | DNA segment, Chr 7, NM_138589<br>Wayne State<br>University 128,<br>expressed |                  | 0.252                                              | -0.153                                               | 0.0000                                           | 0.0005                                                                      | 0.0617                                                                        |
| D830031N03Rik      | NA                                                                           | AK085936         | 0.348                                              | -0.219                                               | 0.0205                                           | 0.0969                                                                      | 0.1435                                                                        |
| Dach2              | dachshund 2<br>(Drosophila)                                                  | AK033050         | 0.175                                              | -0.337                                               | 0.0185                                           | 0.3429                                                                      | 0.0329                                                                        |
| Dact3              | NA                                                                           | XM_985316        | 0.349                                              | -0.057                                               | 0.0141                                           | 0.0098                                                                      | 0.5955                                                                        |
| Dad1               | defender against cell<br>death 1                                             | BC024378         | 0.492                                              | -0.092                                               | 0.0030                                           | 0.0018                                                                      | 0.5983                                                                        |
| Dalrd3             | DALR anticodon<br>binding domain<br>containing 3                             | NM_026378        | 0.252                                              | -0.167                                               | 0.0002                                           | 0.0430                                                                      | 0.0046                                                                        |
| Dap3               | death associated<br>protein 3                                                | NM_022994        | 0.442                                              | -0.153                                               | 0.0000                                           | 0.0000                                                                      | 0.0099                                                                        |
| Dbi                | diazepam binding<br>inhibitor                                                | NM_007830        | 0.699                                              | -0.228                                               | 0.0013                                           | 0.1319                                                                      | 0.0072                                                                        |
| Dbn1               | drebrin 1                                                                    | AK132060         | 0.426                                              | -0.020                                               | 0.0000                                           | 0.0000                                                                      | 0.8618                                                                        |
| Dcamk13            | doublecortin and<br>CaM kinase-like 3                                        | NM_172928        | 0.300                                              | -0.119                                               | 0.0159                                           | 0.0132                                                                      | 0.5410                                                                        |
| Dcbld1             | discoidin, CUB and<br>LCCL domain<br>containing 1                            | NM_025705        | 0.324                                              | -0.240                                               | 0.0001                                           | 0.0014                                                                      | 0.0379                                                                        |
| Dchs1              | NA                                                                           | XM_194371        | 0.373                                              | -0.122                                               | 0.0151                                           | 0.0341                                                                      | 0.2730                                                                        |
| Dcn                | decorin                                                                      | BC060126         | 0.584                                              | -0.134                                               | 0.0000                                           | 0.0000                                                                      | 0.3934                                                                        |
| Dctn2              | dynactin 2                                                                   | NM_027151        | 0.429                                              | -0.120                                               | 0.0000                                           | 0.0000                                                                      | 0.0091                                                                        |
| Dctn3              | dynactin 3                                                                   | BC061120         | 0.471                                              | -0.086                                               | 0.0057                                           | 0.0087                                                                      | 0.3460                                                                        |
| Dctn6              | dynactin 6                                                                   | NM_011722        | 0.334                                              | -0.143                                               | 0.0188                                           | 0.2259                                                                      | 0.0546                                                                        |
| Dex                | doublecortin                                                                 | AK048410         | 0.290                                              | -0.517                                               | 0.0000                                           | 0.0009                                                                      | 0.0000                                                                        |
| Ddah2              | dimethylarginine<br>dimethylaminohydroly<br>ase 2                            | NM_016765        | 0.284                                              | -0.156                                               | 0.0265                                           | 0.0839                                                                      | 0.2056                                                                        |
| Ddc                | dopa decarboxylase                                                           | BC060989         | 0.040                                              | -0.384                                               | 0.0000                                           | 0.8405                                                                      | 0.0000                                                                        |
| Ddit3              | DNA-damage<br>inducible transcript 3                                         | NM_007837        | 0.299                                              | -0.430                                               | 0.0148                                           | 0.2357                                                                      | 0.0412                                                                        |
| Ddr1               | discoidin domain<br>receptor family,<br>member 1                             | BC006836         | 0.477                                              | -0.237                                               | 0.0000                                           | 0.0000                                                                      | 0.0000                                                                        |
| Ddx31              | DEAD/H (Asp-Glu-<br>Ala-Asp/His) box<br>polypeptide 31                       | NM_001033294     | 0.388                                              | -0.106                                               | 0.0000                                           | 0.0000                                                                      | 0.2245                                                                        |

**Table S1.** Continued.

| <b>Gene Symbol</b> | <b>Gene Name</b>                                                                      | <b>Entrez ID</b> | <b>Fold Change<br/><i>MECP2</i>-Tg<br/>over WT</b> | <b>Fold Change<br/><i>Mecp2</i>-null<br/>over WT</b> | <b>FDR-<br/>adjusted<br/>p-value<br/>(Total)</b> | <b>FDR-<br/>adjusted<br/>p-value<br/>(<i>MECP2</i>-<br/>Tg over<br/>WT)</b> | <b>FDR-<br/>adjusted<br/>p-value<br/>(<i>Mecp2</i>-<br/>null over<br/>WT)</b> |
|--------------------|---------------------------------------------------------------------------------------|------------------|----------------------------------------------------|------------------------------------------------------|--------------------------------------------------|-----------------------------------------------------------------------------|-------------------------------------------------------------------------------|
| Ddx39              | DEAD (Asp-Glu-Ala-Asp) box polypeptide 39                                             | AK162752         | 0.418                                              | -0.062                                               | 0.0133                                           | 0.0062                                                                      | 0.7381                                                                        |
| Ddx4               | DEAD (Asp-Glu-Ala-Asp) box polypeptide 4                                              | NM_010029        | 0.136                                              | -0.357                                               | 0.0112                                           | 0.4793                                                                      | 0.0123                                                                        |
| Ddx52              | DEAD (Asp-Glu-Ala-Asp) box polypeptide 52                                             | NM_030096        | 0.265                                              | -0.139                                               | 0.0025                                           | 0.0103                                                                      | 0.1544                                                                        |
| Ddx54              | DEAD (Asp-Glu-Ala-Asp) box polypeptide 54                                             | NM_029408        | 0.316                                              | -0.091                                               | 0.0000                                           | 0.0002                                                                      | 0.0544                                                                        |
| Degs1              | degenerative spermatocyte homolog 1 ( <i>Drosophila</i> )                             | AK165352         | 0.399                                              | -0.058                                               | 0.0381                                           | 0.0168                                                                      | 0.8010                                                                        |
| Dennd2a            | DENN/MADD domain containing 2A                                                        | AK047138         | 0.267                                              | -0.199                                               | 0.0000                                           | 0.0001                                                                      | 0.0001                                                                        |
| Denr               | density-regulated protein                                                             | AK083852         | 0.475                                              | -0.084                                               | 0.0095                                           | 0.0096                                                                      | 0.4663                                                                        |
| Der11              | Der1-like domain family, member 1                                                     | AK028705         | 0.356                                              | -0.047                                               | 0.0016                                           | 0.0008                                                                      | 0.6768                                                                        |
| Der12              | Der1-like domain family, member 2                                                     | AK083725         | 0.262                                              | -0.253                                               | 0.0210                                           | 0.2435                                                                      | 0.0558                                                                        |
| Dgka               | diacylglycerol kinase, alpha                                                          | NM_016811        | 0.468                                              | -0.413                                               | 0.0000                                           | 0.0000                                                                      | 0.0000                                                                        |
| Dgkk               | NA                                                                                    | NM_177914        | 0.568                                              | -0.474                                               | 0.0000                                           | 0.0000                                                                      | 0.0000                                                                        |
| Dgkq               | diacylglycerol kinase, theta                                                          | AK134745         | 0.238                                              | -0.167                                               | 0.0000                                           | 0.0000                                                                      | 0.0000                                                                        |
| Dguok              | deoxyguanosine kinase                                                                 | AK167071         | 0.398                                              | -0.057                                               | 0.0097                                           | 0.0044                                                                      | 0.7415                                                                        |
| Dhrs1              | dehydrogenase/reductase (SDR family) member 1                                         | NM_026819        | 0.543                                              | -0.175                                               | 0.0000                                           | 0.0000                                                                      | 0.0007                                                                        |
| Dhx40              | DEAH (Asp-Glu-Ala-His) box polypeptide 40                                             | NM_026191        | 0.330                                              | -0.286                                               | 0.0000                                           | 0.0000                                                                      | 0.0000                                                                        |
| Dlat               | dihydrolipoamide S-acetyltransferase (E2 component of pyruvate dehydrogenase complex) | NM_145614        | 0.339                                              | -0.080                                               | 0.0000                                           | 0.0000                                                                      | 0.1035                                                                        |

**Table S1.** Continued.

| <b>Gene Symbol</b> | <b>Gene Name</b>                                                                                            | <b>Entrez ID</b> | <b>Fold Change<br/><i>MECP2</i>-Tg<br/>over WT</b> | <b>Fold Change<br/><i>Mecp2</i>-null<br/>over WT</b> | <b>FDR-<br/>adjusted<br/>p-value<br/>(Total)</b> | <b>FDR-<br/>adjusted<br/>p-value<br/>(<i>MECP2</i>-<br/>Tg over<br/>WT)</b> | <b>FDR-<br/>adjusted<br/>p-value<br/>(<i>Mecp2</i>-<br/>null over<br/>WT)</b> |
|--------------------|-------------------------------------------------------------------------------------------------------------|------------------|----------------------------------------------------|------------------------------------------------------|--------------------------------------------------|-----------------------------------------------------------------------------|-------------------------------------------------------------------------------|
| Dld                | dihydrolipoamide dehydrogenase                                                                              | NM_007861        | 0.491                                              | -0.209                                               | 0.0000                                           | 0.0000                                                                      | 0.0002                                                                        |
| Dleu7              | deleted in lymphocytic leukemia, 7                                                                          | AK082171         | 0.727                                              | -0.297                                               | 0.0115                                           | 0.0580                                                                      | 0.1373                                                                        |
| Dll3               | delta-like 3 (Drosophila)                                                                                   | NM_007866        | 0.327                                              | -0.299                                               | 0.0000                                           | 0.0020                                                                      | 0.0008                                                                        |
| Dmc1               | NA                                                                                                          | NM_010059        | 0.302                                              | -0.106                                               | 0.0016                                           | 0.0013                                                                      | 0.4933                                                                        |
| Dmpk               | dystrophia myotonica-protein kinase                                                                         | BC024150         | 0.362                                              | -0.073                                               | 0.0000                                           | 0.0000                                                                      | 0.2987                                                                        |
| Dmrtc1a            | NA                                                                                                          | AK006548         | 0.562                                              | -0.334                                               | 0.0034                                           | 0.0123                                                                      | 0.1760                                                                        |
| Dnahc7b            | NA                                                                                                          | XM_975178        | 0.503                                              | -0.756                                               | 0.0001                                           | 0.1835                                                                      | 0.0003                                                                        |
| Dnaja1             | DnaJ (Hsp40) homolog, subfamily A, member 1                                                                 | AK147604         | 0.276                                              | -0.236                                               | 0.0374                                           | 0.2391                                                                      | 0.1016                                                                        |
| Dnajb1             | DnaJ (Hsp40) homolog, subfamily B, member 1                                                                 | AK158530         | 0.529                                              | -0.102                                               | 0.0012                                           | 0.0009                                                                      | 0.5289                                                                        |
| Dnajb10            | DnaJ (Hsp40) homolog, subfamily B, member 10                                                                | BC085162         | 0.268                                              | -0.176                                               | 0.0030                                           | 0.0120                                                                      | 0.1618                                                                        |
| Dnajc10            | DnaJ (Hsp40) homolog, subfamily C, member 10                                                                | XM_986618        | 0.281                                              | -0.182                                               | 0.0000                                           | 0.0000                                                                      | 0.0000                                                                        |
| Dnajc12            | DnaJ (Hsp40) homolog, subfamily C, member 12                                                                | AK032207         | 0.491                                              | -0.434                                               | 0.0000                                           | 0.0553                                                                      | 0.0000                                                                        |
| Dnpep              | aspartyl aminopeptidase                                                                                     | AF005051         | 0.223                                              | -0.181                                               | 0.0000                                           | 0.0244                                                                      | 0.0010                                                                        |
| Doc2a              | double C2, alpha                                                                                            | NM_010069        | 0.228                                              | -0.328                                               | 0.0000                                           | 0.0030                                                                      | 0.0000                                                                        |
| Doc2g              | double C2, gamma                                                                                            | AK084565         | 0.253                                              | -0.187                                               | 0.0046                                           | 0.0506                                                                      | 0.0675                                                                        |
| Dok4               | docking protein 4                                                                                           | NM_053246        | 0.408                                              | -0.295                                               | 0.0000                                           | 0.0000                                                                      | 0.0002                                                                        |
| Dolpp1             | dolichyl pyrophosphate phosphatase 1                                                                        | NM_020329        | 0.420                                              | -0.043                                               | 0.0000                                           | 0.0000                                                                      | 0.7431                                                                        |
| Dpagt1             | dolichyl-phosphate (UDP-N-acetylglucosamine) acetylglucosaminophosphotransferase 1 (GlcNAc-1-P transferase) | NM_007875        | 0.297                                              | -0.199                                               | 0.0048                                           | 0.0497                                                                      | 0.0712                                                                        |

**Table S1.** Continued.

| <b>Gene Symbol</b> | <b>Gene Name</b>                                | <b>Entrez ID</b> | <b>Fold Change<br/><i>MECP2</i>-Tg<br/>over WT</b> | <b>Fold Change<br/><i>Mecp2</i>-null<br/>over WT</b> | <b>FDR-<br/>adjusted<br/>p-value<br/>(Total)</b> | <b>FDR-<br/>adjusted<br/>p-value<br/>(<i>MECP2</i>-<br/>Tg over<br/>WT)</b> | <b>FDR-<br/>adjusted<br/>p-value<br/>(<i>Mecp2</i>-<br/>null over<br/>WT)</b> |
|--------------------|-------------------------------------------------|------------------|----------------------------------------------------|------------------------------------------------------|--------------------------------------------------|-----------------------------------------------------------------------------|-------------------------------------------------------------------------------|
| Dpp7               | dipeptidylpeptidase 7                           | AK140420         | 0.534                                              | -0.396                                               | 0.0000                                           | 0.0000                                                                      | 0.0000                                                                        |
| Dpp9               | dipeptidylpeptidase 9                           | AK039652         | 0.304                                              | -0.145                                               | 0.0000                                           | 0.0000                                                                      | 0.0001                                                                        |
| Dpy1911            | dpy-19-like 1 (C. elegans)                      | BC031382         | 0.314                                              | -0.246                                               | 0.0000                                           | 0.0002                                                                      | 0.0000                                                                        |
| Dpy1914            | NA                                              | AK165377         | 0.227                                              | -0.268                                               | 0.0000                                           | 0.0022                                                                      | 0.0000                                                                        |
| Dpysl3             | dihydropyrimidinase-like 3                      | AK133040         | 0.335                                              | -0.376                                               | 0.0000                                           | 0.0000                                                                      | 0.0000                                                                        |
| Dpysl4             | dihydropyrimidinase-like 4                      | AK090197         | 0.286                                              | -0.159                                               | 0.0000                                           | 0.0003                                                                      | 0.0741                                                                        |
| Dpysl5             | dihydropyrimidinase-like 5                      | AK082132         | 0.310                                              | -0.185                                               | 0.0000                                           | 0.0000                                                                      | 0.0000                                                                        |
| Drg2               | developmentally regulated GTP binding protein 2 | NM_021354        | 0.458                                              | -0.084                                               | 0.0005                                           | 0.0015                                                                      | 0.1952                                                                        |
| Dscr112            | Down syndrome critical region gene 1-like 2     | NM_022980        | 0.386                                              | -0.178                                               | 0.0085                                           | 0.0492                                                                      | 0.1220                                                                        |
| Dscr2              | Down syndrome critical region homolog 2 (human) | NM_019537        | 0.291                                              | -0.147                                               | 0.0010                                           | 0.0090                                                                      | 0.0787                                                                        |
| Dsg1b              | desmoglein 1 beta                               | NM_181682        | 0.210                                              | -0.232                                               | 0.0197                                           | 0.1752                                                                      | 0.0754                                                                        |
| Dsg1c              | NA                                              | AK034104         | 0.477                                              | -0.760                                               | 0.0000                                           | 0.0100                                                                      | 0.0000                                                                        |
| Dtx4               | deltex 4 homolog (Drosophila)                   | NM_172442        | 0.251                                              | -0.182                                               | 0.0001                                           | 0.0027                                                                      | 0.0302                                                                        |
| Dusp15             | dual specificity phosphatase-like 15            | NM_145744        | 0.454                                              | -0.299                                               | 0.0000                                           | 0.0003                                                                      | 0.0015                                                                        |
| Dusp26             | dual specificity phosphatase 26 (putative)      | NM_025869        | 0.253                                              | -0.186                                               | 0.0166                                           | 0.1538                                                                      | 0.0735                                                                        |
| Dvl1               | dishevelled, dsh homolog 1 (Drosophila)         | NM_010091        | 0.324                                              | -0.119                                               | 0.0000                                           | 0.0000                                                                      | 0.0007                                                                        |
| Dync2h1            | NA                                              | AY452064         | 0.265                                              | -0.251                                               | 0.0000                                           | 0.0000                                                                      | 0.0000                                                                        |
| E130112L23Rik      | RIKEN cDNA E130112L23 gene                      | BC058405         | 0.253                                              | -0.148                                               | 0.0000                                           | 0.0005                                                                      | 0.0013                                                                        |
| E130307M08Rik      | RIKEN cDNA E130307M08 gene                      | NM_026530        | 0.350                                              | -0.197                                               | 0.0000                                           | 0.0000                                                                      | 0.0000                                                                        |
| E2f1               | E2F transcription factor 1                      | AK017841         | 0.162                                              | -0.373                                               | 0.0003                                           | 0.3871                                                                      | 0.0004                                                                        |
| E2f5               | E2F transcription factor 5                      | NM_007892        | 0.418                                              | -0.132                                               | 0.0093                                           | 0.0069                                                                      | 0.5607                                                                        |
| E430002G05Rik      | RIKEN cDNA E430002G05 gene                      | NM_173749        | 0.168                                              | -0.256                                               | 0.0000                                           | 0.0516                                                                      | 0.0003                                                                        |

**Table S1.** Continued.

| <b>Gene Symbol</b> | <b>Gene Name</b>                                                                           | <b>Entrez ID</b> | <b>Fold Change<br/><i>MECP2</i>-Tg<br/>over WT</b> | <b>Fold Change<br/><i>Mecp2</i>-null<br/>over WT</b> | <b>FDR-<br/>adjusted<br/>p-value<br/>(Total)</b> | <b>FDR-<br/>adjusted<br/>p-value<br/>(<i>MECP2</i>-<br/>Tg over<br/>WT)</b> | <b>FDR-<br/>adjusted<br/>p-value<br/>(<i>Mecp2</i>-<br/>null over<br/>WT)</b> |
|--------------------|--------------------------------------------------------------------------------------------|------------------|----------------------------------------------------|------------------------------------------------------|--------------------------------------------------|-----------------------------------------------------------------------------|-------------------------------------------------------------------------------|
| E430028B21Rik      | RIKEN cDNA<br>E430028B21 gene                                                              | NM_178668        | 0.297                                              | -0.193                                               | 0.0085                                           | 0.0142                                                                      | 0.3333                                                                        |
| Ebf4               | early B-cell factor 4                                                                      | AK149248         | 0.242                                              | -0.253                                               | 0.0000                                           | 0.0004                                                                      | 0.0000                                                                        |
| Ebp                | phenylalkylamine<br>Ca <sup>2+</sup> antagonist<br>(emopamil) binding<br>protein           | NM_007898        | 0.305                                              | -0.353                                               | 0.0001                                           | 0.0229                                                                      | 0.0032                                                                        |
| Ece2               | endothelin converting<br>enzyme 2                                                          | BC030900         | 0.250                                              | -0.194                                               | 0.0000                                           | 0.0000                                                                      | 0.0000                                                                        |
| Ecel1              | endothelin converting<br>enzyme-like 1                                                     | NM_021306        | 0.550                                              | -0.455                                               | 0.0000                                           | 0.0000                                                                      | 0.0000                                                                        |
| Echdc1             | enoyl Coenzyme A<br>hydratase domain<br>containing 1                                       | AK150932         | 0.273                                              | -0.243                                               | 0.0011                                           | 0.0160                                                                      | 0.0543                                                                        |
| Echdc2             | enoyl Coenzyme A<br>hydratase domain<br>containing 2                                       | NM_026728        | 0.267                                              | -0.385                                               | 0.0001                                           | 0.0692                                                                      | 0.0012                                                                        |
| Echs1              | enoyl Coenzyme A<br>hydratase, short<br>chain, 1,<br>mitochondrial                         | BC057971         | 0.443                                              | -0.123                                               | 0.0001                                           | 0.0007                                                                      | 0.0908                                                                        |
| Ecm1               | extracellular matrix<br>protein 1                                                          | NM_007899        | 0.156                                              | -0.256                                               | 0.0056                                           | 0.3268                                                                      | 0.0102                                                                        |
| Eef1e1             | eukaryotic translation<br>elongation factor 1<br>epsilon 1                                 | NM_025380        | 0.456                                              | -0.196                                               | 0.0032                                           | 0.0222                                                                      | 0.1018                                                                        |
| Efcab1             | EF hand calcium<br>binding domain 1                                                        | AK015866         | 0.154                                              | -0.388                                               | 0.0093                                           | 0.3592                                                                      | 0.0154                                                                        |
| Efcab5             | NA                                                                                         | NM_176965        | 0.281                                              | -0.182                                               | 0.0010                                           | 0.0156                                                                      | 0.0479                                                                        |
| Efemp1             | epidermal growth<br>factor-containing<br>fibulin-like<br>extracellular matrix<br>protein 1 | XM_978001        | 0.931                                              | -0.317                                               | 0.0000                                           | 0.0000                                                                      | 0.0337                                                                        |
| Efha1              | EF hand domain<br>family A1                                                                | BC031373         | 0.411                                              | -0.182                                               | 0.0005                                           | 0.0211                                                                      | 0.0182                                                                        |
| Efhb               | EF hand domain<br>family, member B                                                         | NM_172497        | 0.218                                              | -0.298                                               | 0.0037                                           | 0.1592                                                                      | 0.0159                                                                        |
| Efhc2              | EF-hand domain (C-<br>terminal) containing<br>2                                            | NM_028916        | 0.105                                              | -0.305                                               | 0.0053                                           | 0.5751                                                                      | 0.0042                                                                        |
| Efna3              | ephrin A3                                                                                  | U90666           | 0.508                                              | -0.532                                               | 0.0000                                           | 0.0005                                                                      | 0.0000                                                                        |
| Efnb3              | ephrin B3                                                                                  | NM_007911        | 0.424                                              | -0.135                                               | 0.0000                                           | 0.0000                                                                      | 0.1380                                                                        |
| EG232887           | NA                                                                                         | NM_021312        | 0.339                                              | -0.304                                               | 0.0120                                           | 0.0536                                                                      | 0.1535                                                                        |

**Table S1.** Continued.

| <b>Gene Symbol</b> | <b>Gene Name</b>                                                                         | <b>Entrez ID</b> | <b>Fold Change<br/><i>MECP2</i>-Tg<br/>over WT</b> | <b>Fold Change<br/><i>Mecp2</i>-null<br/>over WT</b> | <b>FDR-<br/>adjusted<br/>p-value<br/>(Total)</b> | <b>FDR-<br/>adjusted<br/>p-value<br/>(<i>MECP2</i>-<br/>Tg over<br/>WT)</b> | <b>FDR-<br/>adjusted<br/>p-value<br/>(<i>Mecp2</i>-<br/>null over<br/>WT)</b> |
|--------------------|------------------------------------------------------------------------------------------|------------------|----------------------------------------------------|------------------------------------------------------|--------------------------------------------------|-----------------------------------------------------------------------------|-------------------------------------------------------------------------------|
| EG232930           | NA                                                                                       | BC063050         | 0.145                                              | -0.307                                               | 0.0030                                           | 0.2824                                                                      | 0.0065                                                                        |
| EG245305           | NA                                                                                       | AK045713         | 0.472                                              | -0.421                                               | 0.0363                                           | 0.0616                                                                      | 0.3465                                                                        |
| EG245436           | NA                                                                                       | XM_993224        | 0.322                                              | -0.092                                               | 0.0019                                           | 0.0032                                                                      | 0.3117                                                                        |
| EG432822           | NA                                                                                       | NM_026219        | 0.675                                              | -0.535                                               | 0.0200                                           | 0.3699                                                                      | 0.0324                                                                        |
| EG433158           | NA                                                                                       | NM_011368        | 0.376                                              | -0.345                                               | 0.0080                                           | 0.0234                                                                      | 0.2176                                                                        |
| EG433865           | NA                                                                                       | AK131657         | 0.429                                              | -0.162                                               | 0.0010                                           | 0.0008                                                                      | 0.5166                                                                        |
| EG433923           | NA                                                                                       | XM_484885        | 0.467                                              | -0.098                                               | 0.0329                                           | 0.1050                                                                      | 0.2030                                                                        |
| EG435336           | NA                                                                                       | NM_025401        | 0.442                                              | -0.155                                               | 0.0487                                           | 0.0486                                                                      | 0.5138                                                                        |
| EG621205           | NA                                                                                       | XM_992423        | 0.453                                              | -0.097                                               | 0.0000                                           | 0.0000                                                                      | 0.2154                                                                        |
| EG626327           | NA                                                                                       | XM_983802        | 0.264                                              | -0.256                                               | 0.0067                                           | 0.0680                                                                      | 0.0714                                                                        |
| EG627363           | NA                                                                                       | XM_983477        | 0.540                                              | -0.950                                               | 0.0077                                           | 0.0622                                                                      | 0.0892                                                                        |
| EG628781           | NA                                                                                       | XM_921720        | 0.625                                              | -0.296                                               | 0.0074                                           | 0.0511                                                                      | 0.1047                                                                        |
| EG631304           | NA                                                                                       | XM_992966        | 0.477                                              | -0.174                                               | 0.0431                                           | 0.0337                                                                      | 0.5918                                                                        |
| EG631624           | NA                                                                                       | XM_919663        | 0.614                                              | -0.546                                               | 0.0359                                           | 0.0927                                                                      | 0.2450                                                                        |
| EG633057           | NA                                                                                       | XM_001002874     | 0.628                                              | -0.215                                               | 0.0056                                           | 0.0095                                                                      | 0.3224                                                                        |
| EG637273           | NA                                                                                       | XM_001003388     | 0.315                                              | -0.252                                               | 0.0024                                           | 0.4314                                                                      | 0.0028                                                                        |
| EG640613           | NA                                                                                       | NM_011802        | 0.091                                              | -0.410                                               | 0.0447                                           | 0.8363                                                                      | 0.0225                                                                        |
| EG666114           | NA                                                                                       | XM_906812        | 0.396                                              | -0.241                                               | 0.0014                                           | 0.0053                                                                      | 0.1704                                                                        |
| EG666355           | NA                                                                                       | XM_989317        | 0.994                                              | -0.180                                               | 0.0172                                           | 0.0049                                                                      | 0.9288                                                                        |
| EG667736           | NA                                                                                       | XM_976676        | 0.473                                              | -0.512                                               | 0.0020                                           | 0.0372                                                                      | 0.0410                                                                        |
| EG667979           | NA                                                                                       | NM_198410        | 0.529                                              | -0.115                                               | 0.0395                                           | 0.0323                                                                      | 0.5742                                                                        |
| EG668524           | NA                                                                                       | XM_001004842     | 0.603                                              | -0.188                                               | 0.0426                                           | 0.1071                                                                      | 0.2513                                                                        |
| EG668669           | NA                                                                                       | XM_001003013     | 0.434                                              | -0.727                                               | 0.0278                                           | 0.2768                                                                      | 0.0637                                                                        |
| Egfl9              | EGF-like-domain,<br>multiple 9                                                           | NM_207666        | 0.421                                              | -0.241                                               | 0.0000                                           | 0.0001                                                                      | 0.0031                                                                        |
| Ei24               | etoposide induced 2.4<br>mRNA                                                            | NM_007915        | 0.245                                              | -0.187                                               | 0.0000                                           | 0.0091                                                                      | 0.0018                                                                        |
| Eid1               | NA                                                                                       | NM_025613        | 0.520                                              | -0.381                                               | 0.0009                                           | 0.1298                                                                      | 0.0049                                                                        |
| Eif2s1             | eukaryotic translation<br>initiation factor 2,<br>subunit 1 alpha                        | AK049618         | 0.289                                              | -0.136                                               | 0.0178                                           | 0.0271                                                                      | 0.3679                                                                        |
| Eif2s2             | eukaryotic translation<br>initiation factor 2,<br>subunit 2 (beta)                       | NM_026030        | 0.249                                              | -0.259                                               | 0.0004                                           | 0.1128                                                                      | 0.0027                                                                        |
| Eif2s3y            | eukaryotic translation<br>initiation factor 2,<br>subunit 3, structural<br>gene Y-linked | AK012186         | 0.173                                              | -0.288                                               | 0.0000                                           | 0.0257                                                                      | 0.0002                                                                        |
| Eif3s12            | eukaryotic translation<br>initiation factor 3,<br>subunit 12                             | BC027638         | 0.255                                              | -0.157                                               | 0.0273                                           | 0.3195                                                                      | 0.0528                                                                        |

**Table S1.** Continued.

| <b>Gene Symbol</b> | <b>Gene Name</b>                                                               | <b>Entrez ID</b> | <b>Fold Change<br/><i>MECP2</i>-Tg<br/>over WT</b> | <b>Fold Change<br/><i>Mecp2</i>-null<br/>over WT</b> | <b>FDR-<br/>adjusted<br/>p-value<br/>(Total)</b> | <b>FDR-<br/>adjusted<br/>p-value<br/>(<i>MECP2</i>-<br/>Tg over<br/>WT)</b> | <b>FDR-<br/>adjusted<br/>p-value<br/>(<i>Mecp2</i>-<br/>null over<br/>WT)</b> |
|--------------------|--------------------------------------------------------------------------------|------------------|----------------------------------------------------|------------------------------------------------------|--------------------------------------------------|-----------------------------------------------------------------------------|-------------------------------------------------------------------------------|
| Eif3s2             | eukaryotic translation initiation factor 3, subunit 2 (beta)                   | AK149955         | 0.799                                              | -0.012                                               | 0.0001                                           | 0.0000                                                                      | 0.9588                                                                        |
| Eif3s5             | eukaryotic translation initiation factor 3, subunit 5 (epsilon)                | NM_025344        | 0.547                                              | -0.054                                               | 0.0182                                           | 0.0107                                                                      | 0.6610                                                                        |
| Eif3s6ip           | eukaryotic translation initiation factor 3, subunit 6 interacting protein      | NM_145139        | 0.303                                              | -0.143                                               | 0.0002                                           | 0.0023                                                                      | 0.0557                                                                        |
| Eif4e2             | eukaryotic translation initiation factor 4E member 2                           | NM_001039170     | 0.266                                              | -0.321                                               | 0.0017                                           | 0.1405                                                                      | 0.0087                                                                        |
| Elov11             | elongation of very long chain fatty acids (FEN1/Elo2, SUR4/Elo3, yeast)-like 1 | NM_001039175     | 0.340                                              | -0.076                                               | 0.0002                                           | 0.0003                                                                      | 0.3313                                                                        |
| Emid2              | EMI domain containing 2                                                        | AK051600         | 0.266                                              | -0.183                                               | 0.0000                                           | 0.0005                                                                      | 0.0448                                                                        |
| Emp2               | epithelial membrane protein 2                                                  | NM_007929        | 0.332                                              | -0.090                                               | 0.0149                                           | 0.0127                                                                      | 0.5290                                                                        |
| Emp3               | epithelial membrane protein 3                                                  | NM_010129        | 0.428                                              | -0.027                                               | 0.0484                                           | 0.0162                                                                      | 0.9198                                                                        |
| Emr1               | EGF-like module containing, mucin-like, hormone receptor-like sequence 1       | NM_010130        | 0.468                                              | -0.117                                               | 0.0000                                           | 0.0000                                                                      | 0.3520                                                                        |
| Endogl1            | endonuclease G-like 1                                                          | NM_172456        | 0.251                                              | -0.175                                               | 0.0304                                           | 0.1117                                                                      | 0.1791                                                                        |
| Eno3               | enolase 3, beta muscle                                                         | AK002485         | 0.410                                              | -0.044                                               | 0.0090                                           | 0.0041                                                                      | 0.7336                                                                        |
| Enpp6              | ectonucleotide pyrophosphatase/phosphodiesterase 6                             | AK038460         | 0.310                                              | -0.136                                               | 0.0233                                           | 0.0284                                                                      | 0.4338                                                                        |
| Ensa               | endosulfine alpha                                                              | NM_001026212     | 0.265                                              | -0.195                                               | 0.0351                                           | 0.2136                                                                      | 0.1080                                                                        |
| Entpd6             | ectonucleoside triphosphate diphosphohydrolase 6                               | NM_172117        | 0.240                                              | -0.221                                               | 0.0000                                           | 0.0002                                                                      | 0.0000                                                                        |
| Epha1              | Eph receptor A1                                                                | AK017662         | 0.601                                              | -0.325                                               | 0.0000                                           | 0.0000                                                                      | 0.0020                                                                        |
| Ephb6              | Eph receptor B6                                                                | NM_007680        | 0.689                                              | -0.529                                               | 0.0000                                           | 0.0000                                                                      | 0.0000                                                                        |



**Table S1.** Continued.

| <b>Gene Symbol</b> | <b>Gene Name</b>                                                                                      | <b>Entrez ID</b> | <b>Fold Change<br/><i>MECP2</i>-Tg<br/>over WT</b> | <b>Fold Change<br/><i>Mecp2</i>-null<br/>over WT</b> | <b>FDR-<br/>adjusted<br/>p-value<br/>(Total)</b> | <b>FDR-<br/>adjusted<br/>p-value<br/>(<i>MECP2</i>-<br/>Tg over<br/>WT)</b> | <b>FDR-<br/>adjusted<br/>p-value<br/>(<i>Mecp2</i>-<br/>null over<br/>WT)</b> |
|--------------------|-------------------------------------------------------------------------------------------------------|------------------|----------------------------------------------------|------------------------------------------------------|--------------------------------------------------|-----------------------------------------------------------------------------|-------------------------------------------------------------------------------|
| Ephx1              | epoxide hydrolase 1,<br>microsomal                                                                    | NM_010145        | 0.184                                              | -0.258                                               | 0.0119                                           | 0.1807                                                                      | 0.0450                                                                        |
| Ephx2              | epoxide hydrolase 2,<br>cytoplasmic                                                                   | AY098585         | 0.151                                              | -0.354                                               | 0.0000                                           | 0.1970                                                                      | 0.0000                                                                        |
| Epor               | erythropoietin<br>receptor                                                                            | NM_010149        | 0.380                                              | -0.129                                               | 0.0024                                           | 0.0025                                                                      | 0.4320                                                                        |
| Eppb9              | endothelial precursor<br>protein B9                                                                   | AK010355         | 0.404                                              | -0.124                                               | 0.0082                                           | 0.0092                                                                      | 0.4298                                                                        |
| Erbp3              | v-erb-b2<br>erythroblastic<br>leukemia viral<br>oncogene homolog 3<br>(avian)                         | NM_010153        | 0.356                                              | -0.457                                               | 0.0000                                           | 0.0000                                                                      | 0.0000                                                                        |
| Ercc1              | excision repair cross-<br>complementing<br>rodent repair<br>deficiency,<br>complementation<br>group 1 | NM_007948        | 0.379                                              | -0.115                                               | 0.0000                                           | 0.0000                                                                      | 0.1850                                                                        |
| Erf                | Ets2 repressor factor                                                                                 | NM_010155        | 0.691                                              | -0.345                                               | 0.0000                                           | 0.0002                                                                      | 0.0135                                                                        |
| Ergic3             | NA                                                                                                    | BC057130         | 0.454                                              | -0.246                                               | 0.0000                                           | 0.0000                                                                      | 0.0000                                                                        |
| Esco1              | establishment of<br>cohesion 1 homolog<br>1 ( <i>S. cerevisiae</i> )                                  | XM_919590        | 0.199                                              | -0.269                                               | 0.0001                                           | 0.0400                                                                      | 0.0014                                                                        |
| EtfA               | electron transferring<br>flavoprotein, alpha<br>polypeptide                                           | NM_145615        | 0.475                                              | -0.141                                               | 0.0004                                           | 0.0050                                                                      | 0.0620                                                                        |
| EtfDH              | electron transferring<br>flavoprotein,<br>dehydrogenase                                               | AK085493         | 0.430                                              | -0.209                                               | 0.0000                                           | 0.0000                                                                      | 0.0001                                                                        |
| Etnk2              | ethanolamine kinase<br>2                                                                              | NM_175443        | 0.345                                              | -0.340                                               | 0.0000                                           | 0.0268                                                                      | 0.0003                                                                        |
| Exosc8             | exosome component<br>8                                                                                | NM_027148        | 0.332                                              | -0.181                                               | 0.0026                                           | 0.0102                                                                      | 0.1618                                                                        |
| F11r               | F11 receptor                                                                                          | U89915           | 0.243                                              | -0.264                                               | 0.0000                                           | 0.0079                                                                      | 0.0021                                                                        |
| F13a1              | coagulation factor<br>XIII, A1 subunit                                                                | NM_028784        | 0.440                                              | -0.149                                               | 0.0002                                           | 0.0005                                                                      | 0.2307                                                                        |
| Fabp7              | fatty acid binding<br>protein 7, brain                                                                | NM_021272        | 1.112                                              | -0.529                                               | 0.0002                                           | 0.0115                                                                      | 0.0150                                                                        |
| Fads1              | fatty acid desaturase1                                                                                | AK192444         | 0.235                                              | -0.232                                               | 0.0000                                           | 0.0022                                                                      | 0.0000                                                                        |
| Fads2              | fatty acid desaturase2                                                                                | AK032633         | 0.316                                              | -0.189                                               | 0.0000                                           | 0.0000                                                                      | 0.0001                                                                        |
| Fads3              | fatty acid desaturase3                                                                                | BC071266         | 0.310                                              | -0.310                                               | 0.0000                                           | 0.0011                                                                      | 0.0000                                                                        |
| Fah                | fumarylacetoacetate<br>hydrolase                                                                      | NM_010176        | 0.140                                              | -0.262                                               | 0.0000                                           | 0.1436                                                                      | 0.0001                                                                        |

**Table S1.** Continued.

| <b>Gene Symbol</b> | <b>Gene Name</b>                                                         | <b>Entrez ID</b> | <b>Fold Change<br/><i>MECP2</i>-Tg<br/>over WT</b> | <b>Fold Change<br/><i>Mecp2</i>-null<br/>over WT</b> | <b>FDR-<br/>adjusted<br/>p-value<br/>(Total)</b> | <b>FDR-<br/>adjusted<br/>p-value<br/>(<i>MECP2</i>-<br/>Tg over<br/>WT)</b> | <b>FDR-<br/>adjusted<br/>p-value<br/>(<i>Mecp2</i>-<br/>null over<br/>WT)</b> |
|--------------------|--------------------------------------------------------------------------|------------------|----------------------------------------------------|------------------------------------------------------|--------------------------------------------------|-----------------------------------------------------------------------------|-------------------------------------------------------------------------------|
| Fancb              | NA                                                                       | BC100430         | 0.275                                              | -0.191                                               | 0.0327                                           | 0.0880                                                                      | 0.2363                                                                        |
| Fancg              | Fanconi anemia,<br>complementation<br>group G                            | NM_053081        | 0.302                                              | -0.234                                               | 0.0000                                           | 0.0000                                                                      | 0.0007                                                                        |
| Fbln1              | fibulin 1                                                                | NM_010180        | 0.526                                              | -0.398                                               | 0.0000                                           | 0.0000                                                                      | 0.0000                                                                        |
| Fbxl19             | F-box and leucine-<br>rich repeat protein 19                             | XM_989561        | 0.398                                              | -0.059                                               | 0.0000                                           | 0.0000                                                                      | 0.3106                                                                        |
| Fbxl5              | F-box and leucine-<br>rich repeat protein 5                              | NM_178729        | 0.441                                              | -0.128                                               | 0.0000                                           | 0.0010                                                                      | 0.0345                                                                        |
| Fbxl6              | F-box and leucine-<br>rich repeat protein 6                              | BC011485         | 0.360                                              | -0.110                                               | 0.0005                                           | 0.0016                                                                      | 0.1830                                                                        |
| Fbxo36             | F-box only protein 36                                                    | AK036072         | 0.170                                              | -0.349                                               | 0.0123                                           | 0.1566                                                                      | 0.0543                                                                        |
| Fbxo44             | F-box protein 44                                                         | NM_173401        | 0.295                                              | -0.145                                               | 0.0151                                           | 0.1029                                                                      | 0.1026                                                                        |
| Fbxw17             | F-box and WD-40<br>domain protein 17                                     | NM_175401        | 0.235                                              | -0.210                                               | 0.0008                                           | 0.1091                                                                      | 0.0056                                                                        |
| Fbxw4              | F-box and WD-40<br>domain protein 4                                      | NM_013907        | 0.462                                              | -0.017                                               | 0.0000                                           | 0.0000                                                                      | 0.9001                                                                        |
| Fbxw9              | F-box and WD-40<br>domain protein 9                                      | AK156709         | 0.356                                              | -0.110                                               | 0.0005                                           | 0.0013                                                                      | 0.2235                                                                        |
| Fchsd1             | FCH and double SH3<br>domains 1                                          | BC006858         | 0.396                                              | -0.251                                               | 0.0000                                           | 0.0000                                                                      | 0.0017                                                                        |
| Fgf10              | fibroblast growth<br>factor 10                                           | AK045267         | 0.382                                              | -0.270                                               | 0.0463                                           | 0.0728                                                                      | 0.3699                                                                        |
| Fgf11              | fibroblast growth<br>factor 11                                           | BC066859         | 0.565                                              | -0.633                                               | 0.0000                                           | 0.0025                                                                      | 0.0053                                                                        |
| Fgf13              | fibroblast growth<br>factor 13                                           | AF199608         | 0.431                                              | -0.075                                               | 0.0005                                           | 0.0004                                                                      | 0.4644                                                                        |
| Fibp               | fibroblast growth<br>factor (acidic)<br>intracellular binding<br>protein | AK086610         | 0.416                                              | -0.210                                               | 0.0000                                           | 0.0002                                                                      | 0.0008                                                                        |
| Fjx1               | four jointed box 1<br>( <i>Drosophila</i> )                              | NM_010218        | 0.392                                              | -0.341                                               | 0.0351                                           | 0.0830                                                                      | 0.2649                                                                        |
| Fkbp1b             | FK506 binding<br>protein 1b                                              | AB107918         | 0.405                                              | -0.372                                               | 0.0013                                           | 0.0591                                                                      | 0.0169                                                                        |
| Fkbp8              | FK506 binding<br>protein 8                                               | AK188492         | 0.286                                              | -0.148                                               | 0.0000                                           | 0.0002                                                                      | 0.0003                                                                        |
| Fkrp               | fukutin related<br>protein                                               | NM_173430        | 0.397                                              | -0.051                                               | 0.0294                                           | 0.0148                                                                      | 0.7368                                                                        |
| Flna               | filamin, alpha                                                           | XM_907967        | 0.506                                              | -0.281                                               | 0.0000                                           | 0.0000                                                                      | 0.0000                                                                        |
| Flot1              | flotillin 1                                                              | NM_008027        | 0.518                                              | -0.262                                               | 0.0000                                           | 0.0000                                                                      | 0.0000                                                                        |
| Fmo1               | flavin containing<br>monooxygenase 1                                     | AK143940         | 0.417                                              | -0.369                                               | 0.0000                                           | 0.0003                                                                      | 0.0000                                                                        |

**Table S1.** Continued.

| <b>Gene Symbol</b> | <b>Gene Name</b>                                          | <b>Entrez ID</b> | <b>Fold Change<br/><i>MECP2</i>-Tg<br/>over WT</b> | <b>Fold Change<br/><i>Mecp2</i>-null<br/>over WT</b> | <b>FDR-<br/>adjusted<br/>p-value<br/>(Total)</b> | <b>FDR-<br/>adjusted<br/>p-value<br/>(<i>MECP2</i>-<br/>Tg over<br/>WT)</b> | <b>FDR-<br/>adjusted<br/>p-value<br/>(<i>Mecp2</i>-<br/>null over<br/>WT)</b> |
|--------------------|-----------------------------------------------------------|------------------|----------------------------------------------------|------------------------------------------------------|--------------------------------------------------|-----------------------------------------------------------------------------|-------------------------------------------------------------------------------|
| Fmr1               | fragile X mental<br>retardation syndrome<br>1 homolog     | AK205186         | 0.327                                              | -0.084                                               | 0.0001                                           | 0.0002                                                                      | 0.2832                                                                        |
| Fndc4              | fibronectin type III<br>domain containing 4               | NM_022424        | 0.355                                              | -0.175                                               | 0.0007                                           | 0.0053                                                                      | 0.0900                                                                        |
| Folh1              | folate hydrolase                                          | NM_016770        | 0.416                                              | -0.390                                               | 0.0000                                           | 0.0000                                                                      | 0.0000                                                                        |
| Frat1              | frequently rearranged<br>in advanced T-cell<br>lymphomas  | NM_008043        | 0.480                                              | -0.355                                               | 0.0095                                           | 0.2177                                                                      | 0.0289                                                                        |
| Frg1               | FSHD region gene 1                                        | AK038143         | 0.396                                              | -0.146                                               | 0.0012                                           | 0.0104                                                                      | 0.0831                                                                        |
| Frmf3              | FERM domain<br>containing 3                               | NM_172869        | 0.177                                              | -0.785                                               | 0.0000                                           | 0.1989                                                                      | 0.0000                                                                        |
| Ftsj3              | FtsJ homolog 3 (E.<br>coli)                               | NM_025310        | 0.258                                              | -0.170                                               | 0.0000                                           | 0.0000                                                                      | 0.0021                                                                        |
| Fuca1              | fucosidase, alpha-L-<br>1, tissue                         | NM_024243        | 0.273                                              | -0.134                                               | 0.0025                                           | 0.1092                                                                      | 0.0166                                                                        |
| Fuca2              | fucosidase, alpha-L-<br>2, plasma                         | NM_025799        | 0.280                                              | -0.222                                               | 0.0000                                           | 0.0140                                                                      | 0.0025                                                                        |
| Fundc2             | FUN14 domain<br>containing 2                              | NM_026126        | 0.528                                              | -0.397                                               | 0.0000                                           | 0.0139                                                                      | 0.0005                                                                        |
| Fut8               | fucosyltransferase 8                                      | BC010666         | 0.307                                              | -0.124                                               | 0.0001                                           | 0.0025                                                                      | 0.0215                                                                        |
| Fuz                | NA                                                        | XM_001002171     | 0.576                                              | -0.200                                               | 0.0000                                           | 0.0000                                                                      | 0.0006                                                                        |
| Fxyd5              | FXDYD domain-<br>containing ion<br>transport regulator 5  | BC031112         | 0.333                                              | -0.128                                               | 0.0000                                           | 0.0002                                                                      | 0.1824                                                                        |
| Fxyd6              | FXDYD domain-<br>containing ion<br>transport regulator 6  | NM_022004        | 0.135                                              | -0.446                                               | 0.0000                                           | 0.3465                                                                      | 0.0000                                                                        |
| Fxyd7              | FXDYD domain-<br>containing ion<br>transport regulator 7  | NM_022007        | 1.071                                              | -0.798                                               | 0.0000                                           | 0.0000                                                                      | 0.0000                                                                        |
| Fytd1              | forty-two-three<br>domain containing 1                    | NM_027226        | 0.124                                              | -0.353                                               | 0.0000                                           | 0.3201                                                                      | 0.0000                                                                        |
| Fzd8               | frizzled homolog 8<br>(Drosophila)                        | AK034561         | 0.587                                              | -0.352                                               | 0.0000                                           | 0.0008                                                                      | 0.0283                                                                        |
| Fzd9               | frizzled homolog 9<br>(Drosophila)                        | XM_916560        | 0.317                                              | -0.752                                               | 0.0320                                           | 0.7030                                                                      | 0.0210                                                                        |
| G6pc3              | glucose 6<br>phosphatase,<br>catalytic, 3                 | NM_175935        | 0.318                                              | -0.296                                               | 0.0000                                           | 0.0000                                                                      | 0.0000                                                                        |
| Gabarap            | gamma-aminobutyric<br>acid receptor<br>associated protein | BC029329         | 0.734                                              | -0.293                                               | 0.0000                                           | 0.0056                                                                      | 0.0006                                                                        |

**Table S1.** Continued.

| <b>Gene Symbol</b> | <b>Gene Name</b>                                                                   | <b>Entrez ID</b> | <b>Fold Change<br/><i>MECP2</i>-Tg<br/>over WT</b> | <b>Fold Change<br/><i>Mecp2</i>-null<br/>over WT</b> | <b>FDR-<br/>adjusted<br/>p-value<br/>(Total)</b> | <b>FDR-<br/>adjusted<br/>p-value<br/>(<i>MECP2</i>-<br/>Tg over<br/>WT)</b> | <b>FDR-<br/>adjusted<br/>p-value<br/>(<i>Mecp2</i>-<br/>null over<br/>WT)</b> |
|--------------------|------------------------------------------------------------------------------------|------------------|----------------------------------------------------|------------------------------------------------------|--------------------------------------------------|-----------------------------------------------------------------------------|-------------------------------------------------------------------------------|
| Gabarapl2          | gamma-aminobutyric acid (GABA-A) receptor-associated protein-like 2                | NM_026693        | 0.312                                              | -0.241                                               | 0.0052                                           | 0.2709                                                                      | 0.0120                                                                        |
| Gabra2             | gamma-aminobutyric acid (GABA-A) receptor, subunit alpha 2                         | NM_008066        | 0.440                                              | -0.270                                               | 0.0000                                           | 0.0000                                                                      | 0.0000                                                                        |
| Gabra3             | gamma-aminobutyric acid (GABA-A) receptor, subunit alpha 3                         | NM_008067        | 0.318                                              | -0.357                                               | 0.0000                                           | 0.0000                                                                      | 0.0000                                                                        |
| Gabra5             | gamma-aminobutyric acid (GABA-A) receptor, subunit alpha 5                         | NM_176942        | 0.366                                              | -0.097                                               | 0.0001                                           | 0.0000                                                                      | 0.5880                                                                        |
| Gabrg1             | gamma-aminobutyric acid (GABA-A) receptor, subunit gamma 1                         | AK039068         | 0.544                                              | -0.481                                               | 0.0000                                           | 0.0001                                                                      | 0.0000                                                                        |
| Gabrq              | gamma-aminobutyric acid (GABA-A) receptor, subunit theta                           | AK156674         | 0.283                                              | -0.229                                               | 0.0000                                           | 0.0001                                                                      | 0.0330                                                                        |
| Gad1               | glutamic acid decarboxylase 1                                                      | NM_008077        | 0.139                                              | -0.325                                               | 0.0000                                           | 0.0065                                                                      | 0.0000                                                                        |
| Gad2               | glutamic acid decarboxylase 2                                                      | AK136834         | 0.181                                              | -0.507                                               | 0.0000                                           | 0.0001                                                                      | 0.0000                                                                        |
| Gadd45b            | growth arrest and DNA-damage-inducible 45 beta                                     | NM_008655        | 0.405                                              | -0.159                                               | 0.0051                                           | 0.0047                                                                      | 0.4823                                                                        |
| Gadd45gip1         | growth arrest and DNA-damage-inducible, gamma interacting protein 1                | NM_183358        | 0.492                                              | -0.183                                               | 0.0319                                           | 0.0628                                                                      | 0.3092                                                                        |
| Gal                | galanin                                                                            | NM_010253        | 1.063                                              | -0.573                                               | 0.0000                                           | 0.0000                                                                      | 0.0060                                                                        |
| Galk1              | galactokinase 1                                                                    | BC016602         | 0.314                                              | -0.108                                               | 0.0218                                           | 0.0299                                                                      | 0.3997                                                                        |
| Galm               | galactose mutarotase                                                               | AK085153         | 0.175                                              | -0.307                                               | 0.0473                                           | 0.4014                                                                      | 0.0701                                                                        |
| Galnt1             | UDP-N-acetyl-alpha-D-galactosamine:polypeptide N-acetylgalactosaminyltransferase 1 | NM_013814        | 0.328                                              | -0.177                                               | 0.0000                                           | 0.0001                                                                      | 0.0019                                                                        |

**Table S1.** Continued.

| <b>Gene Symbol</b> | <b>Gene Name</b>                                                             | <b>Entrez ID</b> | <b>Fold Change<br/><i>MECP2</i>-Tg<br/>over WT</b> | <b>Fold Change<br/><i>Mecp2</i>-null<br/>over WT</b> | <b>FDR-<br/>adjusted<br/>p-value<br/>(Total)</b> | <b>FDR-<br/>adjusted<br/>p-value<br/>(<i>MECP2</i>-<br/>Tg over<br/>WT)</b> | <b>FDR-<br/>adjusted<br/>p-value<br/>(<i>Mecp2</i>-<br/>null over<br/>WT)</b> |
|--------------------|------------------------------------------------------------------------------|------------------|----------------------------------------------------|------------------------------------------------------|--------------------------------------------------|-----------------------------------------------------------------------------|-------------------------------------------------------------------------------|
| Gamt               | guanidinoacetate<br>methyltransferase                                        | NM_010255        | 0.867                                              | -0.493                                               | 0.0000                                           | 0.0000                                                                      | 0.0000                                                                        |
| Ganab              | alpha glucosidase 2<br>alpha neutral subunit                                 | AK149686         | 0.180                                              | -0.224                                               | 0.0000                                           | 0.0007                                                                      | 0.0000                                                                        |
| Gap43              | growth associated<br>protein 43                                              | AK031908         | 0.115                                              | -0.376                                               | 0.0001                                           | 0.2062                                                                      | 0.0001                                                                        |
| Gatad1             | GATA zinc finger<br>domain containing 1                                      | AK081359         | 0.362                                              | -0.056                                               | 0.0117                                           | 0.0090                                                                      | 0.5523                                                                        |
| Gats               | opposite strand<br>transcription unit to<br>Stag3                            | XM_622563        | 0.290                                              | -0.114                                               | 0.0000                                           | 0.0000                                                                      | 0.0549                                                                        |
| Gba2               | glucosidase beta 2                                                           | BC031397         | 0.440                                              | -0.191                                               | 0.0000                                           | 0.0000                                                                      | 0.0000                                                                        |
| Gcdh               | glutaryl-Coenzyme A<br>dehydrogenase                                         | NM_008097        | 0.479                                              | -0.119                                               | 0.0000                                           | 0.0000                                                                      | 0.0926                                                                        |
| Gck                | glucokinase                                                                  | NM_010292        | 0.299                                              | -0.136                                               | 0.0182                                           | 0.0312                                                                      | 0.3369                                                                        |
| Gckr               | glucokinase                                                                  | NM_144909        | 0.221                                              | -0.220                                               | 0.0049                                           | 0.0437                                                                      | 0.0822                                                                        |
| Gclm               | regulatory protein<br>glutamate-cysteine<br>ligase, modifier<br>subunit      | NM_008129        | 0.291                                              | -0.195                                               | 0.0000                                           | 0.0010                                                                      | 0.0018                                                                        |
| Gcs1               | glucosidase 1                                                                | AK150873         | 0.517                                              | -0.090                                               | 0.0008                                           | 0.0007                                                                      | 0.4730                                                                        |
| Gdf11              | growth<br>differentiation factor<br>11                                       | NM_010272        | 0.399                                              | -0.229                                               | 0.0000                                           | 0.0050                                                                      | 0.0054                                                                        |
| Gdi2               | guanosine<br>diphosphate (GDP)<br>dissociation inhibitor<br>2                | AK013104         | 0.295                                              | -0.259                                               | 0.0009                                           | 0.0156                                                                      | 0.0438                                                                        |
| Gdpd2              | glycerophosphodiesterase<br>r phosphodiesterase<br>domain containing 2       | AK086508         | 0.459                                              | -0.394                                               | 0.0000                                           | 0.0000                                                                      | 0.0000                                                                        |
| Gemin5             | gem (nuclear<br>organelle) associated<br>protein 5                           | NM_172558        | 0.232                                              | -0.226                                               | 0.0000                                           | 0.0000                                                                      | 0.0000                                                                        |
| Gfpt1              | glutamine fructose-6-<br>phosphate<br>transaminase 1                         | AK039792         | 0.254                                              | -0.192                                               | 0.0000                                           | 0.0000                                                                      | 0.0000                                                                        |
| Gfra2              | glial cell line derived<br>neurotrophic factor<br>family receptor alpha<br>2 | NM_008115        | 0.408                                              | -0.381                                               | 0.0000                                           | 0.0008                                                                      | 0.0000                                                                        |
| Ggh                | gamma-glutamyl<br>hydrolase                                                  | XM_989632        | 0.393                                              | -0.255                                               | 0.0354                                           | 0.1131                                                                      | 0.2019                                                                        |

**Table S1.** Continued.

| <b>Gene Symbol</b> | <b>Gene Name</b>                               | <b>Entrez ID</b> | <b>Fold Change<br/><i>MECP2</i>-Tg<br/>over WT</b> | <b>Fold Change<br/><i>Mecp2</i>-null<br/>over WT</b> | <b>FDR-<br/>adjusted<br/>p-value<br/>(Total)</b> | <b>FDR-<br/>adjusted<br/>p-value<br/>(<i>MECP2</i>-<br/>Tg over<br/>WT)</b> | <b>FDR-<br/>adjusted<br/>p-value<br/>(<i>Mecp2</i>-<br/>null over<br/>WT)</b> |
|--------------------|------------------------------------------------|------------------|----------------------------------------------------|------------------------------------------------------|--------------------------------------------------|-----------------------------------------------------------------------------|-------------------------------------------------------------------------------|
| Git1               | G protein-coupled receptor kinase-interactor 1 | NM_001004144     | 0.345                                              | -0.090                                               | 0.0000                                           | 0.0000                                                                      | 0.0011                                                                        |
| Gja9               | gap junction membrane channel protein alpha 9  | NM_010290        | 0.344                                              | -0.170                                               | 0.0206                                           | 0.0222                                                                      | 0.4653                                                                        |
| Gkap1              | G kinase anchoring protein 1                   | NM_019832        | 0.301                                              | -0.221                                               | 0.0152                                           | 0.1322                                                                      | 0.0793                                                                        |
| Gla                | galactosidase, alpha                           | AK164231         | 0.235                                              | -0.229                                               | 0.0034                                           | 0.0373                                                                      | 0.0664                                                                        |
| Glmn               | glomulin, FKBP associated protein              | NM_133248        | 0.370                                              | -0.289                                               | 0.0000                                           | 0.0004                                                                      | 0.0042                                                                        |
| Glo1               | glyoxalase 1                                   | AK037686         | 0.201                                              | -0.237                                               | 0.0190                                           | 0.1301                                                                      | 0.1002                                                                        |
| Glr2               | glycine receptor, alpha 2 subunit              | NM_183427        | 0.462                                              | -0.555                                               | 0.0000                                           | 0.0001                                                                      | 0.0000                                                                        |
| Glr3               | glycine receptor, alpha 3 subunit              | AK038618         | 0.220                                              | -0.757                                               | 0.0000                                           | 0.1528                                                                      | 0.0000                                                                        |
| Glr4               | glycine receptor, alpha 4 subunit              | NM_010297        | 0.422                                              | -0.211                                               | 0.0040                                           | 0.0123                                                                      | 0.2023                                                                        |
| Glt8d1             | glycosyltransferase 8 domain containing 1      | NM_029626        | 0.407                                              | -0.200                                               | 0.0000                                           | 0.0008                                                                      | 0.0076                                                                        |
| Gm1040             | NA                                             | NM_001033457     | 0.406                                              | -0.318                                               | 0.0001                                           | 0.0104                                                                      | 0.0057                                                                        |
| Gm1673             | gene model 1673, (NCBI)                        | BC100514         | 0.565                                              | -0.234                                               | 0.0057                                           | 0.0340                                                                      | 0.1180                                                                        |
| Gm1865             | NA                                             | XM_284307        | 0.406                                              | -0.218                                               | 0.0000                                           | 0.0000                                                                      | 0.0394                                                                        |
| Gm237              | gene model 237, (NCBI)                         | XM_979302        | 0.492                                              | -0.145                                               | 0.0290                                           | 0.0198                                                                      | 0.6263                                                                        |
| Gm440              | gene model 440, (NCBI)                         | NM_198620        | 0.262                                              | -0.192                                               | 0.0000                                           | 0.0003                                                                      | 0.0005                                                                        |
| Gm527              | gene model 527, (NCBI)                         | NM_001025605     | 0.461                                              | -0.092                                               | 0.0214                                           | 0.0134                                                                      | 0.6476                                                                        |
| Gm528              | NA                                             | XM_986450        | 0.581                                              | -0.470                                               | 0.0000                                           | 0.0044                                                                      | 0.0067                                                                        |
| Gm561              | gene model 561, (NCBI)                         | NM_001033297     | 0.571                                              | -0.437                                               | 0.0051                                           | 0.0680                                                                      | 0.0557                                                                        |
| Gm939              | NA                                             | XM_355019        | 0.477                                              | -0.159                                               | 0.0453                                           | 0.0633                                                                      | 0.4030                                                                        |
| Gmip               | Gem-interacting protein                        | NM_198101        | 0.395                                              | -0.385                                               | 0.0000                                           | 0.0000                                                                      | 0.0000                                                                        |
| Gmppb              | GDP-mannose pyrophosphorylase B                | AK165816         | 0.535                                              | -0.274                                               | 0.0000                                           | 0.0006                                                                      | 0.0131                                                                        |
| Gmpr2              | guanosine monophosphate reductase 2            | BC003886         | 0.253                                              | -0.150                                               | 0.0085                                           | 0.0345                                                                      | 0.1670                                                                        |
| Gnb4               | guanine nucleotide binding protein,beta4       | AK020124         | 0.241                                              | -0.175                                               | 0.0023                                           | 0.0456                                                                      | 0.0387                                                                        |

**Table S1.** Continued.

| <b>Gene Symbol</b> | <b>Gene Name</b>                                                | <b>Entrez ID</b> | <b>Fold Change<br/><i>MECP2</i>-Tg<br/>over WT</b> | <b>Fold Change<br/><i>Mecp2</i>-null<br/>over WT</b> | <b>FDR-<br/>adjusted<br/>p-value<br/>(Total)</b> | <b>FDR-<br/>adjusted<br/>p-value<br/>(<i>MECP2</i>-<br/>Tg over<br/>WT)</b> | <b>FDR-<br/>adjusted<br/>p-value<br/>(<i>Mecp2</i>-<br/>null over<br/>WT)</b> |
|--------------------|-----------------------------------------------------------------|------------------|----------------------------------------------------|------------------------------------------------------|--------------------------------------------------|-----------------------------------------------------------------------------|-------------------------------------------------------------------------------|
| Gng4               | guanine nucleotide binding protein (G protein), gamma 4 subunit | NM_010317        | 0.326                                              | -0.205                                               | 0.0040                                           | 0.0283                                                                      | 0.1021                                                                        |
| Gnpda1             | glucosamine-6-phosphate deaminase 1                             | AK084247         | 0.374                                              | -0.380                                               | 0.0000                                           | 0.0034                                                                      | 0.0095                                                                        |
| Golga2             | golgi autoantigen, golgin subfamily a, 2                        | AK077516         | 0.240                                              | -0.175                                               | 0.0000                                           | 0.0001                                                                      | 0.0000                                                                        |
| Golga5             | golgi autoantigen, golgin subfamily a, 5                        | AF026274         | 0.444                                              | -0.108                                               | 0.0001                                           | 0.0004                                                                      | 0.1819                                                                        |
| Gpc3               | glypican 3                                                      | AK077942         | 0.492                                              | -0.100                                               | 0.0063                                           | 0.0046                                                                      | 0.5601                                                                        |
| Gpd1               | glycerol-3-phosphate dehydrogenase 1 (soluble)                  | NM_010271        | 0.249                                              | -0.167                                               | 0.0001                                           | 0.0075                                                                      | 0.0160                                                                        |
| Gpr101             | NA                                                              | NM_001033360     | 0.466                                              | -0.344                                               | 0.0033                                           | 0.0139                                                                      | 0.1557                                                                        |
| Gpr126             | NA                                                              | NM_001002268     | 0.203                                              | -0.391                                               | 0.0000                                           | 0.0390                                                                      | 0.0000                                                                        |
| Gpr149             | G protein-coupled receptor 149                                  | NM_177346        | 0.260                                              | -0.636                                               | 0.0011                                           | 0.3820                                                                      | 0.0016                                                                        |
| Gpr153             | G protein-coupled receptor 153                                  | NM_178406        | 0.499                                              | -0.354                                               | 0.0000                                           | 0.0000                                                                      | 0.0002                                                                        |
| Gpr162             | G protein-coupled receptor 162                                  | BC016413         | 0.386                                              | -0.124                                               | 0.0001                                           | 0.0002                                                                      | 0.2854                                                                        |
| Gpr165             | G protein-coupled receptor 165                                  | AK045935         | 0.211                                              | -0.539                                               | 0.0000                                           | 0.0156                                                                      | 0.0000                                                                        |
| Gpr172b            | G protein-coupled receptor 172B                                 | AK142597         | 0.664                                              | -0.416                                               | 0.0000                                           | 0.0000                                                                      | 0.0023                                                                        |
| Gpr173             | G-protein coupled receptor 173                                  | NM_027543        | 0.494                                              | -0.307                                               | 0.0002                                           | 0.0029                                                                      | 0.0540                                                                        |
| Gpr175             | G protein-coupled receptor 175                                  | NM_011906        | 0.380                                              | -0.178                                               | 0.0000                                           | 0.0000                                                                      | 0.0001                                                                        |
| Gpr177             | NA                                                              | AK031444         | 0.472                                              | -0.258                                               | 0.0000                                           | 0.0000                                                                      | 0.0005                                                                        |
| Gpr26              | G protein-coupled receptor 26                                   | NM_173410        | 0.428                                              | -0.173                                               | 0.0016                                           | 0.0023                                                                      | 0.3497                                                                        |
| Gpr3711            | G protein-coupled receptor 37-like 1                            | NM_134438        | 0.397                                              | -0.122                                               | 0.0023                                           | 0.0044                                                                      | 0.2867                                                                        |
| Gpr4               | G protein-coupled receptor 4                                    | NM_175668        | 0.757                                              | -0.706                                               | 0.0278                                           | 0.0949                                                                      | 0.1917                                                                        |
| Gpr56              | G protein-coupled receptor 56                                   | NM_018882        | 0.459                                              | -0.235                                               | 0.0000                                           | 0.0000                                                                      | 0.0000                                                                        |
| Gpr64              | G protein-coupled receptor 64                                   | AK041291         | 0.212                                              | -0.254                                               | 0.0002                                           | 0.0476                                                                      | 0.0034                                                                        |
| Gpr85              | G protein-coupled receptor 85                                   | NM_145066        | 0.396                                              | -0.250                                               | 0.0018                                           | 0.0038                                                                      | 0.2588                                                                        |

**Table S1.** Continued.

| <b>Gene Symbol</b> | <b>Gene Name</b>                                                 | <b>Entrez ID</b> | <b>Fold Change<br/><i>MECP2</i>-Tg<br/>over WT</b> | <b>Fold Change<br/><i>Mecp2</i>-null<br/>over WT</b> | <b>FDR-<br/>adjusted<br/>p-value<br/>(Total)</b> | <b>FDR-<br/>adjusted<br/>p-value<br/>(<i>MECP2</i>-<br/>Tg over<br/>WT)</b> | <b>FDR-<br/>adjusted<br/>p-value<br/>(<i>Mecp2</i>-<br/>null over<br/>WT)</b> |
|--------------------|------------------------------------------------------------------|------------------|----------------------------------------------------|------------------------------------------------------|--------------------------------------------------|-----------------------------------------------------------------------------|-------------------------------------------------------------------------------|
| Gpr89              | G protein-coupled receptor 89                                    | NM_026229        | 0.320                                              | -0.228                                               | 0.0000                                           | 0.0000                                                                      | 0.0001                                                                        |
| Gprk5              | G protein-coupled receptor kinase 5                              | AK135076         | 0.515                                              | -0.417                                               | 0.0000                                           | 0.0000                                                                      | 0.0000                                                                        |
| Gprk6              | G protein-coupled receptor kinase 6                              | AK051405         | 0.245                                              | -0.172                                               | 0.0000                                           | 0.0000                                                                      | 0.0010                                                                        |
| Gpsm1              | G-protein signalling modulator 1 (AGS3-like, <i>C. elegans</i> ) | BC071197         | 0.326                                              | -0.167                                               | 0.0000                                           | 0.0000                                                                      | 0.0007                                                                        |
| Grb7               | growth factor receptor bound protein 7                           | M94450           | 0.317                                              | -0.239                                               | 0.0024                                           | 0.0242                                                                      | 0.0721                                                                        |
| Grik2              | glutamate receptor, ionotropic, kainate 2 (beta 2)               | NM_010349        | 0.156                                              | -0.290                                               | 0.0000                                           | 0.1029                                                                      | 0.0000                                                                        |
| Grik5              | glutamate receptor, ionotropic, kainate 5 (gamma 2)              | NM_008168        | 0.393                                              | -0.141                                               | 0.0000                                           | 0.0000                                                                      | 0.0000                                                                        |
| Grin2d             | glutamate receptor, ionotropic, NMDA2D (epsilon4)                | NM_008172        | 0.375                                              | -0.205                                               | 0.0000                                           | 0.0000                                                                      | 0.0000                                                                        |
| Grin3a             | glutamate receptor ionotropic, NMDA3A                            | AK138366         | 0.357                                              | -0.319                                               | 0.0001                                           | 0.0009                                                                      | 0.0942                                                                        |
| Grm2               | G protein-coupled receptor, family C, group 1, member B          | XM_909627        | 0.267                                              | -0.143                                               | 0.0401                                           | 0.0814                                                                      | 0.3024                                                                        |
| Grn                | granulin                                                         | NM_008175        | 0.303                                              | -0.178                                               | 0.0000                                           | 0.0000                                                                      | 0.0001                                                                        |
| Grpr               | gastrin releasing peptide receptor                               | NM_008177        | 0.563                                              | -0.524                                               | 0.0248                                           | 0.0725                                                                      | 0.2210                                                                        |
| Grwd1              | glutamate-rich WD repeat containing 1                            | AB001539         | 0.369                                              | -0.176                                               | 0.0003                                           | 0.0046                                                                      | 0.0505                                                                        |
| Gsn                | gelsolin                                                         | BC060377         | 0.527                                              | -0.142                                               | 0.0000                                           | 0.0000                                                                      | 0.0079                                                                        |
| Gstk1              | glutathione S-transferase kappa 1                                | NM_029555        | 0.608                                              | -0.158                                               | 0.0002                                           | 0.0005                                                                      | 0.2104                                                                        |
| Gstm4              | glutathione S-transferase, mu 4                                  | NM_026764        | 0.314                                              | -0.212                                               | 0.0000                                           | 0.0002                                                                      | 0.0064                                                                        |
| Gstm6              | glutathione S-transferase, mu 6                                  | NM_008184        | 0.666                                              | -0.450                                               | 0.0000                                           | 0.0000                                                                      | 0.0000                                                                        |
| Gstm7              | glutathione S-transferase, mu 7                                  | NM_026672        | 0.545                                              | -0.337                                               | 0.0000                                           | 0.0000                                                                      | 0.0002                                                                        |
| Gstp1              | glutathione S-transferase, pi 1                                  | NM_013541        | 0.797                                              | -0.248                                               | 0.0000                                           | 0.0000                                                                      | 0.0011                                                                        |
| Gstp2              | NA                                                               | NM_181796        | 0.473                                              | -0.368                                               | 0.0000                                           | 0.0040                                                                      | 0.0020                                                                        |



**Table S1.** Continued.

| <b>Gene Symbol</b> | <b>Gene Name</b>                                                         | <b>Entrez ID</b> | <b>Fold Change<br/><i>MECP2</i>-Tg<br/>over WT</b> | <b>Fold Change<br/><i>Mecp2</i>-null<br/>over WT</b> | <b>FDR-<br/>adjusted<br/>p-value<br/>(Total)</b> | <b>FDR-<br/>adjusted<br/>p-value<br/>(<i>MECP2</i>-<br/>Tg over<br/>WT)</b> | <b>FDR-<br/>adjusted<br/>p-value<br/>(<i>Mecp2</i>-<br/>null over<br/>WT)</b> |
|--------------------|--------------------------------------------------------------------------|------------------|----------------------------------------------------|------------------------------------------------------|--------------------------------------------------|-----------------------------------------------------------------------------|-------------------------------------------------------------------------------|
| Gstt1              | glutathione S-<br>transferase, theta 1                                   | NM_008185        | 0.446                                              | -0.264                                               | 0.0013                                           | 0.0524                                                                      | 0.0202                                                                        |
| Gstt2              | glutathione S-<br>transferase, theta 2                                   | BC012707         | 0.415                                              | -0.381                                               | 0.0001                                           | 0.0046                                                                      | 0.0229                                                                        |
| Gstt3              | glutathione S-<br>transferase, theta 3                                   | NM_133994        | 0.425                                              | -0.207                                               | 0.0031                                           | 0.0029                                                                      | 0.4640                                                                        |
| Gstz1              | glutathione<br>transferase zeta 1<br>(maleylacetoacetate<br>isomerase)   | NM_010363        | 0.228                                              | -0.180                                               | 0.0008                                           | 0.0218                                                                      | 0.0285                                                                        |
| Gtf2e2             | general transcription<br>factor II E,<br>polypeptide 2 (beta<br>subunit) | BC020016         | 0.320                                              | -0.336                                               | 0.0000                                           | 0.0103                                                                      | 0.0036                                                                        |
| Gtf2h3             | general transcription<br>factor IIIH,<br>polypeptide 3                   | NM_181410        | 0.384                                              | -0.047                                               | 0.0015                                           | 0.0005                                                                      | 0.7770                                                                        |
| Gtf3c5             | general transcription<br>factor IIIC,<br>polypeptide 5                   | NM_148928        | 0.563                                              | -0.167                                               | 0.0000                                           | 0.0000                                                                      | 0.0207                                                                        |
| Gucy1a2            | guanylate cyclase 1,<br>soluble, alpha 2                                 | NM_001033322     | 0.405                                              | -0.340                                               | 0.0000                                           | 0.0000                                                                      | 0.0000                                                                        |
| Gucy1a3            | guanylate cyclase 1,<br>soluble, alpha 3                                 | NM_021896        | 0.202                                              | -0.251                                               | 0.0000                                           | 0.0050                                                                      | 0.0001                                                                        |
| Gulp1              | GULP, engulfment<br>adaptor PTB domain<br>containing 1                   | NM_028450        | 0.212                                              | -0.279                                               | 0.0066                                           | 0.1268                                                                      | 0.0373                                                                        |
| Gusb               | glucuronidase, beta                                                      | BC018202         | 0.219                                              | -0.234                                               | 0.0000                                           | 0.0361                                                                      | 0.0002                                                                        |
| Gyg                | NA                                                                       | NM_013755        | 0.300                                              | -0.313                                               | 0.0003                                           | 0.0777                                                                      | 0.0026                                                                        |
| Gyk                | glycerol kinase                                                          | NM_008194        | 0.221                                              | -0.189                                               | 0.0001                                           | 0.0145                                                                      | 0.0082                                                                        |
| Gzf1               | NA                                                                       | NM_028986        | 0.421                                              | -0.215                                               | 0.0000                                           | 0.0026                                                                      | 0.0141                                                                        |
| H13                | histocompatibility 13                                                    | BC056977         | 0.295                                              | -0.125                                               | 0.0000                                           | 0.0000                                                                      | 0.0053                                                                        |
| H2afy3             | H2A histone family,<br>member Y3                                         | NM_207000        | 0.619                                              | -0.128                                               | 0.0079                                           | 0.0043                                                                      | 0.6626                                                                        |
| H2-DMa             | histocompatibility 2,<br>class II, locus DMa                             | AK146950         | 0.549                                              | -0.258                                               | 0.0179                                           | 0.0201                                                                      | 0.4502                                                                        |
| H2-Ke2             | H2-K region<br>expressed gene 2                                          | NM_010385        | 0.124                                              | -0.308                                               | 0.0209                                           | 0.6969                                                                      | 0.0134                                                                        |
| H2-Ke6             | H2-K region<br>expressed gene 6                                          | AK169702         | 0.551                                              | -0.050                                               | 0.0426                                           | 0.0206                                                                      | 0.7718                                                                        |
| H2-M3              | histocompatibility 2,<br>M region locus 3                                | NM_013819        | 0.565                                              | -0.103                                               | 0.0140                                           | 0.0056                                                                      | 0.7980                                                                        |
| H2-Q2              | histocompatibility 2,<br>Q region locus 2                                | NM_010392        | 0.437                                              | -0.445                                               | 0.0146                                           | 0.1201                                                                      | 0.0845                                                                        |

**Table S1.** Continued.

| <b>Gene Symbol</b> | <b>Gene Name</b>                                                      | <b>Entrez ID</b> | <b>Fold Change<br/><i>MECP2</i>-Tg<br/>over WT</b> | <b>Fold Change<br/><i>Mecp2</i>-null<br/>over WT</b> | <b>FDR-<br/>adjusted<br/>p-value<br/>(Total)</b> | <b>FDR-<br/>adjusted<br/>p-value<br/>(<i>MECP2</i>-<br/>Tg over<br/>WT)</b> | <b>FDR-<br/>adjusted<br/>p-value<br/>(<i>Mecp2</i>-<br/>null over<br/>WT)</b> |
|--------------------|-----------------------------------------------------------------------|------------------|----------------------------------------------------|------------------------------------------------------|--------------------------------------------------|-----------------------------------------------------------------------------|-------------------------------------------------------------------------------|
| H2-T10             | histocompatibility 2, T region locus 10                               | NM_010395        | 0.139                                              | -0.394                                               | 0.0061                                           | 0.5830                                                                      | 0.0049                                                                        |
| Hap1               | huntingtin-associated protein 1                                       | NM_010404        | 0.388                                              | -0.209                                               | 0.0000                                           | 0.0000                                                                      | 0.0000                                                                        |
| Hars               | histidyl-tRNA synthetase                                              | AK014253         | 0.536                                              | -0.131                                               | 0.0000                                           | 0.0000                                                                      | 0.0113                                                                        |
| Harsl              | histidyl-tRNA synthetase-like                                         | NM_080636        | 0.257                                              | -0.174                                               | 0.0002                                           | 0.0088                                                                      | 0.0153                                                                        |
| Hbp1               | high mobility group box transcription factor 1                        | NM_153198        | 0.501                                              | -0.067                                               | 0.0000                                           | 0.0000                                                                      | 0.5482                                                                        |
| Hbxip              | hepatitis B virus x interacting protein                               | XM_973046        | 0.698                                              | -0.102                                               | 0.0251                                           | 0.0180                                                                      | 0.6071                                                                        |
| Hccs               | holocytochrome c synthetase                                           | AK028608         | 0.341                                              | -0.099                                               | 0.0046                                           | 0.0047                                                                      | 0.4469                                                                        |
| Hcfc1r1            | host cell factor C1 regulator 1 (XPO1-dependent)                      | NM_181821        | 0.291                                              | -0.228                                               | 0.0072                                           | 0.1109                                                                      | 0.0467                                                                        |
| Hcn3               | hyperpolarization-activated, cyclic nucleotide-gated K <sup>+</sup> 3 | AF064875         | 0.559                                              | -0.474                                               | 0.0000                                           | 0.0000                                                                      | 0.0001                                                                        |
| Hcrtr1             | hypocretin (orexin) receptor 1                                        | NM_198959        | 0.694                                              | -0.918                                               | 0.0000                                           | 0.0000                                                                      | 0.0000                                                                        |
| Hcrtr2             | hypocretin (orexin) receptor 2                                        | AY336084         | 0.424                                              | -0.471                                               | 0.0000                                           | 0.0026                                                                      | 0.0067                                                                        |
| Hdac11             | histone deacetylase 11                                                | NM_144919        | 0.314                                              | -0.138                                               | 0.0000                                           | 0.0000                                                                      | 0.0179                                                                        |
| Hdac2              | histone deacetylase 2                                                 | NM_008229        | 0.358                                              | -0.281                                               | 0.0000                                           | 0.0009                                                                      | 0.0000                                                                        |
| Hdac6              | histone deacetylase 6                                                 | XM_973545        | 0.318                                              | -0.309                                               | 0.0000                                           | 0.0000                                                                      | 0.0000                                                                        |
| Hddc2              | HD domain containing 2                                                | AK009957         | 0.334                                              | -0.350                                               | 0.0009                                           | 0.0390                                                                      | 0.0191                                                                        |
| Hdgf               | hepatoma-derived growth factor                                        | NM_008231        | 0.272                                              | -0.183                                               | 0.0000                                           | 0.0208                                                                      | 0.0018                                                                        |
| Hells              | helicase, lymphoid specific                                           | AK014040         | 0.113                                              | -0.333                                               | 0.0010                                           | 0.5578                                                                      | 0.0008                                                                        |
| Heph               | hephaestin                                                            | NM_010417        | 0.331                                              | -0.343                                               | 0.0000                                           | 0.0001                                                                      | 0.0000                                                                        |
| Herc4              | hect domain and RLD 4                                                 | AK019546         | 0.258                                              | -0.202                                               | 0.0000                                           | 0.0001                                                                      | 0.0000                                                                        |
| Hes5               | hairy and enhancer of split 5 ( <i>Drosophila</i> )                   | NM_010419        | 0.308                                              | -0.333                                               | 0.0003                                           | 0.0735                                                                      | 0.0037                                                                        |
| Hexa               | hexosaminidase A                                                      | NM_010421        | 0.351                                              | -0.129                                               | 0.0000                                           | 0.0002                                                                      | 0.0611                                                                        |
| Hexdc              | NA                                                                    | NM_001001333     | 0.354                                              | -0.157                                               | 0.0000                                           | 0.0000                                                                      | 0.0050                                                                        |

**Table S1.** Continued.

| <b>Gene Symbol</b> | <b>Gene Name</b>                                     | <b>Entrez ID</b> | <b>Fold Change<br/><i>MECP2</i>-Tg<br/>over WT</b> | <b>Fold Change<br/><i>Mecp2</i>-null<br/>over WT</b> | <b>FDR-<br/>adjusted<br/>p-value<br/>(Total)</b> | <b>FDR-<br/>adjusted<br/>p-value<br/>(<i>MECP2</i>-<br/>Tg over<br/>WT)</b> | <b>FDR-<br/>adjusted<br/>p-value<br/>(<i>Mecp2</i>-<br/>null over<br/>WT)</b> |
|--------------------|------------------------------------------------------|------------------|----------------------------------------------------|------------------------------------------------------|--------------------------------------------------|-----------------------------------------------------------------------------|-------------------------------------------------------------------------------|
| Hibch              | 3-hydroxyisobutyryl-Coenzyme A hydrolase             | AK186066         | 0.362                                              | -0.309                                               | 0.0000                                           | 0.0008                                                                      | 0.0002                                                                        |
| Hist1h2be          | histone 1, H2be                                      | NM_178194        | 0.417                                              | -0.439                                               | 0.0006                                           | 0.0240                                                                      | 0.0191                                                                        |
| Hist2h3c2          | histone 2, H3c2                                      | NM_054045        | 1.004                                              | -0.914                                               | 0.0237                                           | 0.0586                                                                      | 0.2557                                                                        |
| Hmgcs1             | 3-hydroxy-3-methylglutaryl-Coenzyme A synthase 1     | NM_145942        | 0.208                                              | -0.240                                               | 0.0000                                           | 0.0000                                                                      | 0.0000                                                                        |
| Hn1                | hematological and neurological expressed sequence 1  | NM_008258        | 0.505                                              | -0.238                                               | 0.0045                                           | 0.1918                                                                      | 0.0156                                                                        |
| Hn11               | NA                                                   | NM_198937        | 0.500                                              | -0.319                                               | 0.0004                                           | 0.0014                                                                      | 0.1691                                                                        |
| Hnmt               | histamine N-methyltransferase                        | AK050129         | 0.495                                              | -0.509                                               | 0.0000                                           | 0.0030                                                                      | 0.0036                                                                        |
| Hnrpab             | heterogeneous nuclear ribonucleoprotein A/B          | BC043069         | 0.340                                              | -0.061                                               | 0.0000                                           | 0.0000                                                                      | 0.4870                                                                        |
| Hnrph3             | heterogeneous nuclear ribonucleoprotein H3           | XM_897051        | 0.262                                              | -0.160                                               | 0.0197                                           | 0.1424                                                                      | 0.0942                                                                        |
| Hook1              | hook homolog 1 (Drosophila)                          | AK028714         | 0.290                                              | -0.236                                               | 0.0000                                           | 0.0001                                                                      | 0.0000                                                                        |
| Hpcal4             | hippocalcin-like 4                                   | NM_174998        | 0.654                                              | -0.442                                               | 0.0000                                           | 0.0000                                                                      | 0.0001                                                                        |
| Hpgd               | hydroxyprostaglandin dehydrogenase 15 (NAD)          | NM_008278        | 0.594                                              | -0.140                                               | 0.0009                                           | 0.0010                                                                      | 0.4015                                                                        |
| Hras1              | Harvey rat sarcoma virus oncogene 1                  | BC011083         | 0.438                                              | -0.155                                               | 0.0077                                           | 0.0625                                                                      | 0.0889                                                                        |
| Hrh3               | histamine receptor H3                                | NM_133849        | 0.433                                              | -0.198                                               | 0.0003                                           | 0.0010                                                                      | 0.1759                                                                        |
| Hrsp12             | heat-responsive protein 12                           | AK005016         | 0.490                                              | -0.218                                               | 0.0001                                           | 0.0042                                                                      | 0.0108                                                                        |
| Hs3st5             | heparan sulfate (glucosamine) 3-O-sulfotransferase 5 | XM_356462        | 0.304                                              | -0.307                                               | 0.0050                                           | 0.1056                                                                      | 0.0346                                                                        |
| Hsd17b10           | NA                                                   | NM_016763        | 0.530                                              | -0.187                                               | 0.0004                                           | 0.0019                                                                      | 0.1401                                                                        |
| Hsf2               | heat shock factor 2                                  | NM_008297        | 0.285                                              | -0.250                                               | 0.0000                                           | 0.0049                                                                      | 0.0000                                                                        |
| Hspa1a             | heat shock protein 1A                                | NM_010479        | 0.874                                              | -0.671                                               | 0.0258                                           | 0.0305                                                                      | 0.4446                                                                        |
| Hspb1              | heat shock protein 1                                 | NM_013560        | 0.717                                              | -0.370                                               | 0.0086                                           | 0.1285                                                                      | 0.0478                                                                        |

**Table S1.** Continued.

| <b>Gene Symbol</b> | <b>Gene Name</b>                                            | <b>Entrez ID</b> | <b>Fold Change<br/><i>MECP2</i>-Tg<br/>over WT</b> | <b>Fold Change<br/><i>Mecp2</i>-null<br/>over WT</b> | <b>FDR-<br/>adjusted<br/>p-value<br/>(Total)</b> | <b>FDR-<br/>adjusted<br/>p-value<br/>(<i>MECP2</i>-<br/>Tg over<br/>WT)</b> | <b>FDR-<br/>adjusted<br/>p-value<br/>(<i>Mecp2</i>-<br/>null over<br/>WT)</b> |
|--------------------|-------------------------------------------------------------|------------------|----------------------------------------------------|------------------------------------------------------|--------------------------------------------------|-----------------------------------------------------------------------------|-------------------------------------------------------------------------------|
| Hspb8              | heat shock 27kDa protein 8                                  | NM_030704        | 0.247                                              | -0.215                                               | 0.0172                                           | 0.1002                                                                      | 0.1188                                                                        |
| Hspc171            | NA                                                          | BC024608         | 0.459                                              | -0.249                                               | 0.0014                                           | 0.0250                                                                      | 0.0446                                                                        |
| Hspd1              | heat shock protein 1 (chaperonin)                           | BC106112         | 0.290                                              | -0.199                                               | 0.0008                                           | 0.1632                                                                      | 0.0031                                                                        |
| Htr1a              | 5-hydroxytryptamine (serotonin) receptor 1A                 | NM_008308        | 0.753                                              | -0.598                                               | 0.0022                                           | 0.0260                                                                      | 0.0643                                                                        |
| Htr2a              | NA                                                          | NM_172812        | 0.326                                              | -0.236                                               | 0.0001                                           | 0.0046                                                                      | 0.0097                                                                        |
| Htr2c              | 5-hydroxytryptamine (serotonin) receptor 2C                 | NM_008312        | 0.329                                              | -0.252                                               | 0.0000                                           | 0.0004                                                                      | 0.0004                                                                        |
| Htr3a              | 5-hydroxytryptamine (serotonin) receptor 3A                 | NM_013561        | 0.404                                              | -0.291                                               | 0.0000                                           | 0.0003                                                                      | 0.0622                                                                        |
| Htr5a              | 5-hydroxytryptamine (serotonin) receptor 5A                 | NM_008314        | 0.418                                              | -0.302                                               | 0.0016                                           | 0.0107                                                                      | 0.1022                                                                        |
| Htra2              | HtrA serine peptidase 2                                     | NM_019752        | 0.414                                              | -0.043                                               | 0.0447                                           | 0.0199                                                                      | 0.8045                                                                        |
| Hyls1              | NA                                                          | BC035953         | 0.511                                              | -0.191                                               | 0.0111                                           | 0.0128                                                                      | 0.4310                                                                        |
| Iars2              | isoleucine-tRNA synthetase 2, mitochondrial                 | AK043729         | 0.201                                              | -0.216                                               | 0.0000                                           | 0.0010                                                                      | 0.0000                                                                        |
| Ict1               | immature colon carcinoma transcript 1                       | BC079614         | 0.258                                              | -0.204                                               | 0.0004                                           | 0.0765                                                                      | 0.0044                                                                        |
| Idh1               | isocitrate dehydrogenase 1 (NADP+), soluble                 | NM_010497        | 0.151                                              | -0.285                                               | 0.0000                                           | 0.2085                                                                      | 0.0000                                                                        |
| Ier3               | immediate early response 3                                  | NM_133662        | 0.372                                              | -0.413                                               | 0.0199                                           | 0.4461                                                                      | 0.0250                                                                        |
| Ier3ip1            | immediate early response 3 interacting protein 1            | NM_025409        | 0.557                                              | -0.326                                               | 0.0001                                           | 0.0003                                                                      | 0.1331                                                                        |
| Ifi30              | interferon gamma inducible protein 30                       | NM_023065        | 0.720                                              | -0.232                                               | 0.0000                                           | 0.0000                                                                      | 0.3064                                                                        |
| Ifit2              | interferon-induced protein with tetratricopeptide repeats 2 | NM_008332        | 0.545                                              | -0.323                                               | 0.0360                                           | 0.0757                                                                      | 0.2934                                                                        |
| Ifitm3             | interferon induced transmembrane protein 3                  | NM_025378        | 0.650                                              | -0.182                                               | 0.0206                                           | 0.0144                                                                      | 0.6076                                                                        |

**Table S1.** Continued.

| <b>Gene Symbol</b> | <b>Gene Name</b>                                   | <b>Entrez ID</b> | <b>Fold Change<br/><i>MECP2</i>-Tg<br/>over WT</b> | <b>Fold Change<br/><i>Mecp2</i>-null<br/>over WT</b> | <b>FDR-<br/>adjusted<br/>p-value<br/>(Total)</b> | <b>FDR-<br/>adjusted<br/>p-value<br/>(<i>MECP2</i>-<br/>Tg over<br/>WT)</b> | <b>FDR-<br/>adjusted<br/>p-value<br/>(<i>Mecp2</i>-<br/>null over<br/>WT)</b> |
|--------------------|----------------------------------------------------|------------------|----------------------------------------------------|------------------------------------------------------|--------------------------------------------------|-----------------------------------------------------------------------------|-------------------------------------------------------------------------------|
| Ift122             | NA                                                 | NM_031177        | 0.229                                              | -0.182                                               | 0.0000                                           | 0.0000                                                                      | 0.0000                                                                        |
| Ift140             | NA                                                 | NM_134126        | 0.229                                              | -0.198                                               | 0.0000                                           | 0.0000                                                                      | 0.0004                                                                        |
| Ift172             | NA                                                 | NM_026298        | 0.309                                              | -0.155                                               | 0.0000                                           | 0.0000                                                                      | 0.0000                                                                        |
| Ift74              | NA                                                 | BC049156         | 0.170                                              | -0.259                                               | 0.0002                                           | 0.0830                                                                      | 0.0019                                                                        |
| Igfbp2             | insulin-like growth<br>factor binding protein<br>2 | NM_008342        | 0.875                                              | -0.370                                               | 0.0000                                           | 0.0000                                                                      | 0.0311                                                                        |
| Igfbp4             | insulin-like growth<br>factor binding protein<br>4 | NM_010517        | 0.719                                              | -0.013                                               | 0.0040                                           | 0.0009                                                                      | 0.9866                                                                        |
| Igfbp5             | insulin-like growth<br>factor binding protein<br>5 | NM_010518        | 0.347                                              | -0.222                                               | 0.0000                                           | 0.0010                                                                      | 0.0046                                                                        |
| Igsf1              | immunoglobulin<br>superfamily, member<br>1         | NM_177591        | 0.611                                              | -0.301                                               | 0.0000                                           | 0.0000                                                                      | 0.0000                                                                        |
| Igsf21             | immunoglobulin<br>superfamily, member<br>21        | NM_198610        | 0.483                                              | -0.198                                               | 0.0000                                           | 0.0000                                                                      | 0.0010                                                                        |
| Igsf4b             | immunoglobulin<br>superfamily, member<br>4B        | NM_053199        | 0.262                                              | -0.154                                               | 0.0001                                           | 0.0019                                                                      | 0.0221                                                                        |
| Igsf9              | immunoglobulin<br>superfamily, member<br>9         | AK053544         | 0.242                                              | -0.220                                               | 0.0000                                           | 0.0004                                                                      | 0.0032                                                                        |
| Ihpk1              | inositol<br>hexaphosphate kinase<br>1              | AK006216         | 0.389                                              | -0.017                                               | 0.0068                                           | 0.0021                                                                      | 0.8699                                                                        |
| Ik                 | IK cytokine                                        | NM_011879        | 0.294                                              | -0.273                                               | 0.0000                                           | 0.0289                                                                      | 0.0004                                                                        |
| Il18               | interleukin 18                                     | NM_008360        | 0.350                                              | -0.163                                               | 0.0387                                           | 0.0737                                                                      | 0.3186                                                                        |
| Ilvbl              | ilvB (bacterial<br>acetolactate<br>synthase)-like  | AK138031         | 0.324                                              | -0.216                                               | 0.0000                                           | 0.0047                                                                      | 0.0000                                                                        |
| Impdh1             | inosine 5'-phosphate<br>dehydrogenase 1            | NM_011829        | 0.343                                              | -0.091                                               | 0.0000                                           | 0.0000                                                                      | 0.1751                                                                        |
| Impdh2             | inosine 5'-phosphate<br>dehydrogenase 2            | AK203194         | 0.501                                              | -0.157                                               | 0.0000                                           | 0.0000                                                                      | 0.0204                                                                        |
| Ing2               | NA                                                 | NM_023503        | 0.647                                              | -0.400                                               | 0.0085                                           | 0.0305                                                                      | 0.1841                                                                        |
| Inpp11             | inositol<br>polyphosphate<br>phosphatase-like 1    | NM_010567        | 0.321                                              | -0.133                                               | 0.0000                                           | 0.0000                                                                      | 0.0051                                                                        |
| Ints3              | NA                                                 | AK040147         | 0.263                                              | -0.138                                               | 0.0000                                           | 0.0000                                                                      | 0.0001                                                                        |

**Table S1.** Continued.

| <b>Gene Symbol</b> | <b>Gene Name</b>                                                    | <b>Entrez ID</b> | <b>Fold Change<br/><i>MECP2</i>-Tg<br/>over WT</b> | <b>Fold Change<br/><i>Mecp2</i>-null<br/>over WT</b> | <b>FDR-<br/>adjusted<br/>p-value<br/>(Total)</b> | <b>FDR-<br/>adjusted<br/>p-value<br/>(<i>MECP2</i>-<br/>Tg over<br/>WT)</b> | <b>FDR-<br/>adjusted<br/>p-value<br/>(<i>Mecp2</i>-<br/>null over<br/>WT)</b> |
|--------------------|---------------------------------------------------------------------|------------------|----------------------------------------------------|------------------------------------------------------|--------------------------------------------------|-----------------------------------------------------------------------------|-------------------------------------------------------------------------------|
| Ipp                | IAP promoted placental gene                                         | AK042290         | 0.226                                              | -0.189                                               | 0.0193                                           | 0.0715                                                                      | 0.1806                                                                        |
| Iqcg               | IQ motif containing G                                               | XM_001001741     | 0.299                                              | -0.295                                               | 0.0020                                           | 0.0661                                                                      | 0.0229                                                                        |
| Irf5               | interferon regulatory factor 5                                      | AK150598         | 0.296                                              | -0.157                                               | 0.0229                                           | 0.0506                                                                      | 0.2814                                                                        |
| Isyna1             | NA                                                                  | NM_023627        | 0.590                                              | -0.213                                               | 0.0000                                           | 0.0000                                                                      | 0.0001                                                                        |
| Itga3              | integrin alpha 3                                                    | BC062205         | 0.319                                              | -0.282                                               | 0.0000                                           | 0.0000                                                                      | 0.0000                                                                        |
| Itga7              | integrin alpha 7                                                    | NM_008398        | 0.479                                              | -0.196                                               | 0.0000                                           | 0.0000                                                                      | 0.0000                                                                        |
| Itih2              | inter-alpha trypsin inhibitor, heavy chain 2                        | AK149533         | 0.302                                              | -0.112                                               | 0.0014                                           | 0.0017                                                                      | 0.3916                                                                        |
| Itm2a              | integral membrane protein 2A                                        | NM_008409        | 0.365                                              | -0.249                                               | 0.0000                                           | 0.0070                                                                      | 0.0003                                                                        |
| Itpa               | inosine triphosphatase (nucleoside triphosphate pyrophosphatase)    | NM_025922        | 0.366                                              | -0.066                                               | 0.0118                                           | 0.0050                                                                      | 0.7646                                                                        |
| Jag2               | jagged 2                                                            | BC009082         | 0.462                                              | -0.156                                               | 0.0000                                           | 0.0000                                                                      | 0.0001                                                                        |
| Jak3               | Janus kinase 3                                                      | NM_010589        | 0.292                                              | -0.200                                               | 0.0000                                           | 0.0000                                                                      | 0.0052                                                                        |
| Jam2               | junction adhesion molecule 2                                        | NM_023844        | 0.333                                              | -0.381                                               | 0.0000                                           | 0.0001                                                                      | 0.0000                                                                        |
| Jmjd3              | jumonji domain containing 3                                         | BC075632         | 0.293                                              | -0.161                                               | 0.0000                                           | 0.0000                                                                      | 0.0007                                                                        |
| Josd2              | NA                                                                  | NM_025368        | 0.295                                              | -0.207                                               | 0.0044                                           | 0.1160                                                                      | 0.0276                                                                        |
| Jtb                | jumping translocation breakpoint                                    | AK146337         | 0.573                                              | -0.046                                               | 0.0067                                           | 0.0023                                                                      | 0.8204                                                                        |
| Jup                | junction plakoglobin                                                | AK086401         | 0.454                                              | -0.285                                               | 0.0000                                           | 0.0000                                                                      | 0.0000                                                                        |
| Katnal2            | NA                                                                  | BC069977         | 0.179                                              | -0.263                                               | 0.0026                                           | 0.1784                                                                      | 0.0098                                                                        |
| Kbtbd3             | kelch repeat and BTB (POZ) domain containing 3                      | NM_026962        | 0.247                                              | -0.480                                               | 0.0135                                           | 0.3453                                                                      | 0.0239                                                                        |
| Kbtbd4             | kelch repeat and BTB (POZ) domain containing 4                      | NM_025991        | 0.489                                              | -0.220                                               | 0.0227                                           | 0.0578                                                                      | 0.2491                                                                        |
| Kcna3              | potassium voltage-gated channel, shaker-related subfamily, member 3 | NM_008418        | 0.375                                              | -0.233                                               | 0.0049                                           | 0.1038                                                                      | 0.0342                                                                        |

**Table S1.** Continued.

| <b>Gene Symbol</b> | <b>Gene Name</b>                                                          | <b>Entrez ID</b> | <b>Fold Change<br/><i>MECP2</i>-Tg<br/>over WT</b> | <b>Fold Change<br/><i>Mecp2</i>-null<br/>over WT</b> | <b>FDR-<br/>adjusted<br/>p-value<br/>(Total)</b> | <b>FDR-<br/>adjusted<br/>p-value<br/>(<i>MECP2</i>-<br/>Tg over<br/>WT)</b> | <b>FDR-<br/>adjusted<br/>p-value<br/>(<i>Mecp2</i>-<br/>null over<br/>WT)</b> |
|--------------------|---------------------------------------------------------------------------|------------------|----------------------------------------------------|------------------------------------------------------|--------------------------------------------------|-----------------------------------------------------------------------------|-------------------------------------------------------------------------------|
| Kcna6              | potassium voltage-gated channel, shaker-related, subfamily, member 6      | AK031890         | 0.275                                              | -0.218                                               | 0.0257                                           | 0.3237                                                                      | 0.0493                                                                        |
| Kcnc4              | potassium voltage-gated channel, Shaw-related subfamily, member 4         | NM_145922        | 0.302                                              | -0.189                                               | 0.0000                                           | 0.0118                                                                      | 0.0022                                                                        |
| Kcnd1              | potassium voltage-gated channel, Shal-related family, member 1            | NM_008423        | 0.289                                              | -0.205                                               | 0.0014                                           | 0.0160                                                                      | 0.0662                                                                        |
| Kcne11             | potassium voltage-gated channel, Isk-related family, member 1-like        | NM_021487        | 0.481                                              | -0.082                                               | 0.0495                                           | 0.0304                                                                      | 0.6882                                                                        |
| Kcnh2              | potassium voltage-gated channel, subfamily H (eag-related), member 2      | XM_981382        | 0.375                                              | -0.180                                               | 0.0000                                           | 0.0000                                                                      | 0.0003                                                                        |
| Kcnk4              | potassium channel, subfamilyK, member4                                    | NM_008431        | 0.260                                              | -0.185                                               | 0.0002                                           | 0.0029                                                                      | 0.0483                                                                        |
| Kcnv1              | potassium channel, subfamilyV, member1                                    | NM_026200        | 0.734                                              | -0.190                                               | 0.0028                                           | 0.0010                                                                      | 0.7969                                                                        |
| Kctd5              | potassium channel tetramerisation domain containing 5                     | NM_027008        | 0.471                                              | -0.109                                               | 0.0210                                           | 0.0133                                                                      | 0.6407                                                                        |
| Kdelc1             | KDEL (Lys-Asp-Glu-Leu) containing1                                        | NM_023645        | 0.190                                              | -0.248                                               | 0.0011                                           | 0.1327                                                                      | 0.0061                                                                        |
| Kdelr1             | KDEL (Lys-Asp-Glu-Leu) endoplasmic reticulum protein retention receptor 1 | NM_133950        | 0.553                                              | -0.168                                               | 0.0002                                           | 0.0002                                                                      | 0.3452                                                                        |
| Kif17              | kinesin family member 17                                                  | AK083171         | 0.334                                              | -0.193                                               | 0.0000                                           | 0.0000                                                                      | 0.0168                                                                        |
| Kir3dl2            | NA                                                                        | AK046171         | 0.484                                              | -0.160                                               | 0.0001                                           | 0.0001                                                                      | 0.3554                                                                        |
| Kirrel1            | kin of IRRE like 1 ( <i>Drosophila</i> )                                  | BC023765         | 0.450                                              | -0.146                                               | 0.0000                                           | 0.0000                                                                      | 0.1355                                                                        |
| Klc4               | NA                                                                        | NM_029091        | 0.371                                              | -0.099                                               | 0.0000                                           | 0.0000                                                                      | 0.1448                                                                        |
| Klf6               | Kruppel-like factor 6                                                     | AY027436         | 0.299                                              | -0.148                                               | 0.0122                                           | 0.0410                                                                      | 0.1945                                                                        |
| Klf8               | NA                                                                        | BC070442         | 0.457                                              | -0.273                                               | 0.0005                                           | 0.0020                                                                      | 0.1658                                                                        |
| Klhdc8a            | NA                                                                        | NM_144810        | 0.266                                              | -0.382                                               | 0.0000                                           | 0.0264                                                                      | 0.0001                                                                        |

**Table S1.** Continued.

| <b>Gene Symbol</b> | <b>Gene Name</b>                                             | <b>Entrez ID</b> | <b>Fold Change<br/><i>MECP2</i>-Tg<br/>over WT</b> | <b>Fold Change<br/><i>Mecp2</i>-null<br/>over WT</b> | <b>FDR-<br/>adjusted<br/>p-value<br/>(Total)</b> | <b>FDR-<br/>adjusted<br/>p-value<br/>(<i>MECP2</i>-<br/>Tg over<br/>WT)</b> | <b>FDR-<br/>adjusted<br/>p-value<br/>(<i>Mecp2</i>-<br/>null over<br/>WT)</b> |
|--------------------|--------------------------------------------------------------|------------------|----------------------------------------------------|------------------------------------------------------|--------------------------------------------------|-----------------------------------------------------------------------------|-------------------------------------------------------------------------------|
| Klhl1              | kelch-like 1<br>(Drosophila)                                 | AK163473         | 0.395                                              | -0.468                                               | 0.0000                                           | 0.0000                                                                      | 0.0000                                                                        |
| Klhl12             | kelch-like 12<br>(Drosophila)                                | NM_153128        | 0.284                                              | -0.225                                               | 0.0000                                           | 0.0069                                                                      | 0.0008                                                                        |
| Klhl13             | kelch-like 13<br>(Drosophila)                                | NM_026167        | 0.256                                              | -0.328                                               | 0.0000                                           | 0.0769                                                                      | 0.0004                                                                        |
| Klhl2              | kelch-like 2, Mayven<br>(Drosophila)                         | AK167903         | 0.390                                              | -0.053                                               | 0.0006                                           | 0.0004                                                                      | 0.5713                                                                        |
| Klhl23             | kelch-like 23<br>(Drosophila)                                | NM_177784        | 0.523                                              | -0.075                                               | 0.0004                                           | 0.0002                                                                      | 0.6311                                                                        |
| Klhl24             | NA                                                           | NM_029436        | 0.369                                              | -0.112                                               | 0.0000                                           | 0.0000                                                                      | 0.0248                                                                        |
| Klhl4              | kelch-like 4<br>(Drosophila)                                 | NM_172781        | 0.246                                              | -0.334                                               | 0.0000                                           | 0.0653                                                                      | 0.0002                                                                        |
| Klk6               | kallikrein 6                                                 | NM_011177        | 0.349                                              | -0.373                                               | 0.0002                                           | 0.0198                                                                      | 0.0070                                                                        |
| Klrg1              | killer cell lectin-like<br>receptor subfamily G,<br>member 1 | NM_016970        | 0.382                                              | -0.260                                               | 0.0258                                           | 0.0652                                                                      | 0.2509                                                                        |
| Krit1              | KRIT1, ankyrin<br>repeat containing                          | AK050470         | 0.178                                              | -0.232                                               | 0.0000                                           | 0.0334                                                                      | 0.0000                                                                        |
| Krtcap2            | keratinocyte<br>associated protein 2                         | NM_025327        | 0.438                                              | -0.226                                               | 0.0004                                           | 0.0065                                                                      | 0.0504                                                                        |
| L1cam              | L1 cell adhesion<br>molecule                                 | NM_008478        | 0.189                                              | -0.317                                               | 0.0000                                           | 0.0000                                                                      | 0.0000                                                                        |
| L3mbtl             | NA                                                           | BC116639         | 0.289                                              | -0.359                                               | 0.0000                                           | 0.0000                                                                      | 0.0000                                                                        |
| L3mbtl2            | l(3)mbt-like 2<br>(Drosophila)                               | AY237002         | 0.271                                              | -0.205                                               | 0.0000                                           | 0.0001                                                                      | 0.0000                                                                        |
| Lair1              | leukocyte-associated<br>Ig-like receptor 1                   | AF491829         | 0.381                                              | -0.116                                               | 0.0026                                           | 0.0017                                                                      | 0.5742                                                                        |
| Lama2              | laminin, alpha 2                                             | NM_008481        | 0.367                                              | -0.186                                               | 0.0000                                           | 0.0000                                                                      | 0.0001                                                                        |
| Larp2              | NA                                                           | BC025528         | 0.372                                              | -0.278                                               | 0.0061                                           | 0.0379                                                                      | 0.1151                                                                        |
| Lasp1              | LIM and SH3 protein<br>1                                     | NM_010688        | 0.248                                              | -0.352                                               | 0.0000                                           | 0.0000                                                                      | 0.0000                                                                        |
| Lass4              | longevity assurance<br>homolog 4 (S.<br>cerevisiae)          | AK036108         | 0.378                                              | -0.339                                               | 0.0000                                           | 0.0000                                                                      | 0.0000                                                                        |
| Lass5              | longevity assurance<br>homolog 5 (S.<br>cerevisiae)          | BC043059         | 0.326                                              | -0.238                                               | 0.0000                                           | 0.0057                                                                      | 0.0001                                                                        |
| Lcat               | lecithin cholesterol<br>acyltransferase                      | NM_008490        | 0.260                                              | -0.242                                               | 0.0001                                           | 0.0465                                                                      | 0.0017                                                                        |
| Lcor1              | NA                                                           | BC066151         | 0.355                                              | -0.411                                               | 0.0070                                           | 0.1068                                                                      | 0.0470                                                                        |
| Lcp2               | lymphocyte cytosolic<br>protein 2                            | AK170491         | 0.310                                              | -0.119                                               | 0.0013                                           | 0.0016                                                                      | 0.3842                                                                        |



**Table S1.** Continued.

| <b>Gene Symbol</b> | <b>Gene Name</b>                                    | <b>Entrez ID</b> | <b>Fold Change<br/><i>MECP2</i>-Tg<br/>over WT</b> | <b>Fold Change<br/><i>Mecp2</i>-null<br/>over WT</b> | <b>FDR-<br/>adjusted<br/>p-value<br/>(Total)</b> | <b>FDR-<br/>adjusted<br/>p-value<br/>(<i>MECP2</i>-<br/>Tg over<br/>WT)</b> | <b>FDR-<br/>adjusted<br/>p-value<br/>(<i>Mecp2</i>-<br/>null over<br/>WT)</b> |
|--------------------|-----------------------------------------------------|------------------|----------------------------------------------------|------------------------------------------------------|--------------------------------------------------|-----------------------------------------------------------------------------|-------------------------------------------------------------------------------|
| Ldb1               | LIM domain binding<br>1                             | NM_010697        | 0.383                                              | -0.083                                               | 0.0000                                           | 0.0000                                                                      | 0.0546                                                                        |
| Ldoc1              | leucine zipper, down-<br>regulated in cancer 1      | NM_001018087     | 1.025                                              | -1.156                                               | 0.0200                                           | 0.2584                                                                      | 0.0501                                                                        |
| Lemd1              | LEM domain<br>containing 1                          | BC048759         | 0.635                                              | -0.674                                               | 0.0001                                           | 0.0056                                                                      | 0.0099                                                                        |
| Leng4              | leukocyte receptor<br>cluster (LRC)<br>member 4     | AK038998         | 0.324                                              | -0.356                                               | 0.0000                                           | 0.0069                                                                      | 0.0000                                                                        |
| Leprel2            | leprecan-like 2                                     | NM_013530        | 0.289                                              | -0.123                                               | 0.0000                                           | 0.0000                                                                      | 0.0745                                                                        |
| Lfng               | lunatic fringe gene<br>homolog<br>(Drosophila)      | BC115680         | 0.699                                              | -0.077                                               | 0.0305                                           | 0.0152                                                                      | 0.7438                                                                        |
| Lig1               | ligase I, DNA, ATP-<br>dependent                    | AK153993         | 0.321                                              | -0.301                                               | 0.0000                                           | 0.0017                                                                      | 0.0022                                                                        |
| Lims1              | LIM and senescent<br>cell antigen-like<br>domains 1 | AK087984         | 0.321                                              | -0.147                                               | 0.0006                                           | 0.0021                                                                      | 0.1718                                                                        |
| Lims2              | LIM and senescent<br>cell antigen like<br>domains 2 | NM_144862        | 0.177                                              | -0.231                                               | 0.0002                                           | 0.1337                                                                      | 0.0013                                                                        |
| Llgl1              | NA                                                  | BC043458         | 0.331                                              | -0.152                                               | 0.0000                                           | 0.0000                                                                      | 0.0002                                                                        |
| Lmbr1              | limb region 1                                       | NM_020295        | 0.234                                              | -0.263                                               | 0.0000                                           | 0.0020                                                                      | 0.0000                                                                        |
| Lmna               | lamin A                                             | AK150501         | 0.294                                              | -0.207                                               | 0.0000                                           | 0.0004                                                                      | 0.0001                                                                        |
| Lmol               | LIM domain only 1                                   | NM_057173        | 0.530                                              | -0.090                                               | 0.0151                                           | 0.0096                                                                      | 0.6264                                                                        |
| LOC194612          | NA                                                  | XM_904918        | 0.498                                              | -0.312                                               | 0.0488                                           | 0.0354                                                                      | 0.6219                                                                        |
| LOC230765          | NA                                                  | NM_008228        | 0.202                                              | -0.239                                               | 0.0364                                           | 0.3412                                                                      | 0.0656                                                                        |
| LOC241715          | NA                                                  | XR_003863        | 0.255                                              | -0.212                                               | 0.0234                                           | 0.1346                                                                      | 0.1178                                                                        |
| LOC242546          | NA                                                  | AK136922         | 0.271                                              | -0.384                                               | 0.0027                                           | 0.2597                                                                      | 0.0065                                                                        |
| LOC380850          | NA                                                  | XM_001004736     | 0.729                                              | -0.472                                               | 0.0116                                           | 0.0285                                                                      | 0.2527                                                                        |
| LOC432459          | NA                                                  | AK082906         | 0.586                                              | -0.525                                               | 0.0069                                           | 0.0400                                                                      | 0.1211                                                                        |
| LOC432466          | NA                                                  | XR_004490        | 0.435                                              | -0.385                                               | 0.0000                                           | 0.0000                                                                      | 0.0000                                                                        |
| LOC432482          | NA                                                  | NM_008705        | 0.416                                              | -0.283                                               | 0.0001                                           | 0.3885                                                                      | 0.0002                                                                        |
| LOC432881          | NA                                                  | AK135962         | 0.312                                              | -0.333                                               | 0.0000                                           | 0.0126                                                                      | 0.0001                                                                        |
| LOC432947          | NA                                                  | NM_029868        | 0.356                                              | -0.237                                               | 0.0045                                           | 0.0617                                                                      | 0.0533                                                                        |
| LOC433299          | NA                                                  | XM_905512        | 0.337                                              | -0.629                                               | 0.0037                                           | 0.3170                                                                      | 0.0068                                                                        |
| LOC433791          | NA                                                  | XM_485487        | 1.026                                              | -0.414                                               | 0.0007                                           | 0.0007                                                                      | 0.4303                                                                        |
| LOC434008          | NA                                                  | NM_001004182     | 0.307                                              | -0.203                                               | 0.0003                                           | 0.0270                                                                      | 0.0092                                                                        |
| LOC497266          | NA                                                  | AK090221         | 0.267                                              | -0.200                                               | 0.0267                                           | 0.1151                                                                      | 0.1547                                                                        |
| LOC544782          | NA                                                  | AK016732         | 0.380                                              | -0.183                                               | 0.0000                                           | 0.0007                                                                      | 0.0124                                                                        |
| LOC545344          | NA                                                  | XR_003455        | 1.080                                              | -0.950                                               | 0.0233                                           | 0.3665                                                                      | 0.0385                                                                        |

**Table S1.** Continued.

| <b>Gene Symbol</b> | <b>Gene Name</b> | <b>Entrez ID</b> | <b>Fold Change<br/><i>MECP2</i>-Tg<br/>over WT</b> | <b>Fold Change<br/><i>Mecp2</i>-null<br/>over WT</b> | <b>FDR-<br/>adjusted<br/>p-value<br/>(Total)</b> | <b>FDR-<br/>adjusted<br/>p-value<br/>(<i>MECP2</i>-<br/>Tg over<br/>WT)</b> | <b>FDR-<br/>adjusted<br/>p-value<br/>(<i>Mecp2</i>-<br/>null over<br/>WT)</b> |
|--------------------|------------------|------------------|----------------------------------------------------|------------------------------------------------------|--------------------------------------------------|-----------------------------------------------------------------------------|-------------------------------------------------------------------------------|
| LOC619632          | NA               | NM_027909        | 0.491                                              | -0.209                                               | 0.0000                                           | 0.0000                                                                      | 0.0520                                                                        |
| LOC620016          | NA               | NM_023140        | 0.472                                              | -0.129                                               | 0.0323                                           | 0.0909                                                                      | 0.2279                                                                        |
| LOC620315          | NA               | AK013829         | 0.907                                              | -0.330                                               | 0.0207                                           | 0.1026                                                                      | 0.1375                                                                        |
| LOC620695          | NA               | XM_885087        | 0.578                                              | -0.334                                               | 0.0231                                           | 0.1998                                                                      | 0.0766                                                                        |
| LOC620963          | NA               | NM_170777        | 0.258                                              | -0.156                                               | 0.0395                                           | 0.0360                                                                      | 0.5367                                                                        |
| LOC622404          | NA               | NM_001037913     | 0.379                                              | -0.280                                               | 0.0001                                           | 0.0029                                                                      | 0.0230                                                                        |
| LOC623031          | NA               | NM_145558        | 0.533                                              | -0.067                                               | 0.0438                                           | 0.0345                                                                      | 0.5901                                                                        |
| LOC623205          | NA               | NM_025444        | 0.720                                              | -0.280                                               | 0.0180                                           | 0.0464                                                                      | 0.2458                                                                        |
| LOC623672          | NA               | XR_003915        | 0.394                                              | -0.210                                               | 0.0227                                           | 0.5693                                                                      | 0.0204                                                                        |
| LOC623706          | NA               | NM_144806        | 0.348                                              | -0.224                                               | 0.0092                                           | 0.0451                                                                      | 0.1414                                                                        |
| LOC623748          | NA               | NM_024442        | 0.458                                              | -0.371                                               | 0.0216                                           | 0.1234                                                                      | 0.1190                                                                        |
| LOC624138          | NA               | BC022965         | 0.403                                              | -0.107                                               | 0.0012                                           | 0.0033                                                                      | 0.2163                                                                        |
| LOC624405          | NA               | XM_993288        | 0.695                                              | -0.187                                               | 0.0068                                           | 0.0054                                                                      | 0.5311                                                                        |
| LOC624512          | NA               | XM_620409        | 0.848                                              | -0.354                                               | 0.0338                                           | 0.0331                                                                      | 0.5094                                                                        |
| LOC625377          | NA               | NM_030702        | 0.440                                              | -0.107                                               | 0.0156                                           | 0.0181                                                                      | 0.4396                                                                        |
| LOC627816          | NA               | XR_004574        | 0.392                                              | -0.308                                               | 0.0430                                           | 0.2192                                                                      | 0.1270                                                                        |
| LOC627905          | NA               | AK169456         | 0.376                                              | -0.294                                               | 0.0127                                           | 0.0617                                                                      | 0.1414                                                                        |
| LOC627995          | NA               | XM_909683        | 0.559                                              | -0.374                                               | 0.0058                                           | 0.0763                                                                      | 0.0555                                                                        |
| LOC628205          | NA               | XM_892939        | 0.783                                              | -0.563                                               | 0.0081                                           | 0.0400                                                                      | 0.1405                                                                        |
| LOC628935          | NA               | NM_183250        | 1.755                                              | -0.629                                               | 0.0434                                           | 0.3868                                                                      | 0.0671                                                                        |
| LOC629315          | NA               | XM_001001842     | 0.941                                              | -0.701                                               | 0.0160                                           | 0.0977                                                                      | 0.1142                                                                        |
| LOC629709          | NA               | NM_175001        | 0.423                                              | -0.095                                               | 0.0426                                           | 0.0293                                                                      | 0.6407                                                                        |
| LOC630141          | NA               | NM_172394        | 0.280                                              | -0.194                                               | 0.0023                                           | 0.0092                                                                      | 0.1609                                                                        |
| LOC630164          | NA               | XM_903265        | 0.242                                              | -0.479                                               | 0.0021                                           | 0.4273                                                                      | 0.0025                                                                        |
| LOC631029          | NA               | XR_003705        | 0.799                                              | -0.309                                               | 0.0303                                           | 0.0395                                                                      | 0.4171                                                                        |
| LOC631337          | NA               | XM_979840        | 0.513                                              | -0.155                                               | 0.0001                                           | 0.0005                                                                      | 0.0810                                                                        |
| LOC631868          | NA               | XR_002899        | 0.572                                              | -0.541                                               | 0.0016                                           | 0.0719                                                                      | 0.0170                                                                        |
| LOC632489          | NA               | XM_977351        | 0.757                                              | -0.274                                               | 0.0215                                           | 0.0764                                                                      | 0.1860                                                                        |
| LOC632781          | NA               | XR_002201        | 0.550                                              | -0.384                                               | 0.0114                                           | 0.0226                                                                      | 0.2974                                                                        |
| LOC633347          | NA               | AK039689         | 0.130                                              | -0.696                                               | 0.0000                                           | 0.7756                                                                      | 0.0000                                                                        |
| LOC633402          | NA               | NM_009491        | 0.171                                              | -0.523                                               | 0.0263                                           | 0.7062                                                                      | 0.0169                                                                        |
| LOC633983          | NA               | NM_011072        | 0.408                                              | -0.131                                               | 0.0025                                           | 0.0043                                                                      | 0.3101                                                                        |
| LOC634142          | NA               | XR_004271        | 0.142                                              | -0.698                                               | 0.0013                                           | 0.8544                                                                      | 0.0005                                                                        |
| LOC635169          | NA               | XM_910141        | 0.205                                              | -0.305                                               | 0.0304                                           | 0.5236                                                                      | 0.0310                                                                        |
| LOC636781          | NA               | NM_001004148     | 0.290                                              | -0.214                                               | 0.0000                                           | 0.0020                                                                      | 0.0165                                                                        |
| LOC637453          | NA               | XM_985839        | 0.392                                              | -1.283                                               | 0.0031                                           | 0.6760                                                                      | 0.0019                                                                        |
| LOC638311          | NA               | NM_178915        | 0.446                                              | -0.114                                               | 0.0030                                           | 0.0018                                                                      | 0.6078                                                                        |
| LOC638791          | NA               | AK008133         | 0.514                                              | -0.197                                               | 0.0095                                           | 0.0330                                                                      | 0.1890                                                                        |

**Table S1.** Continued.

| <b>Gene Symbol</b> | <b>Gene Name</b> | <b>Entrez ID</b> | <b>Fold Change<br/><i>MECP2</i>-Tg<br/>over WT</b> | <b>Fold Change<br/><i>Mecp2</i>-null<br/>over WT</b> | <b>FDR-<br/>adjusted<br/>p-value<br/>(Total)</b> | <b>FDR-<br/>adjusted<br/>p-value<br/>(<i>MECP2</i>-<br/>Tg over<br/>WT)</b> | <b>FDR-<br/>adjusted<br/>p-value<br/>(<i>Mecp2</i>-<br/>null over<br/>WT)</b> |
|--------------------|------------------|------------------|----------------------------------------------------|------------------------------------------------------|--------------------------------------------------|-----------------------------------------------------------------------------|-------------------------------------------------------------------------------|
| LOC639384          | NA               | NM_177325        | 0.292                                              | -0.217                                               | 0.0005                                           | 0.0140                                                                      | 0.0282                                                                        |
| LOC639496          | NA               | XM_915944        | 2.560                                              | -0.348                                               | 0.0010                                           | 0.0004                                                                      | 0.7026                                                                        |
| LOC639942          | NA               | XM_984742        | 0.278                                              | -0.335                                               | 0.0216                                           | 0.2645                                                                      | 0.0524                                                                        |
| LOC640145          | NA               | NM_025586        | 0.635                                              | -0.135                                               | 0.0438                                           | 0.0912                                                                      | 0.2969                                                                        |
| LOC640607          | NA               | XM_917655        | 0.822                                              | -0.481                                               | 0.0193                                           | 0.0666                                                                      | 0.1906                                                                        |
| LOC640972          | NA               | AK032155         | 0.175                                              | -0.316                                               | 0.0344                                           | 0.3444                                                                      | 0.0612                                                                        |
| LOC664857          | NA               | BC116882         | 0.294                                              | -0.230                                               | 0.0201                                           | 0.1737                                                                      | 0.0778                                                                        |
| LOC664985          | NA               | XM_974465        | 0.253                                              | -0.282                                               | 0.0492                                           | 0.1390                                                                      | 0.2256                                                                        |
| LOC666532          | NA               | XM_984410        | 0.720                                              | -0.382                                               | 0.0103                                           | 0.0568                                                                      | 0.1263                                                                        |
| LOC667016          | NA               | XR_001959        | 0.587                                              | -0.394                                               | 0.0016                                           | 0.0330                                                                      | 0.0385                                                                        |
| LOC667301          | NA               | NM_010281        | 0.553                                              | -0.291                                               | 0.0000                                           | 0.0007                                                                      | 0.0041                                                                        |
| LOC667666          | NA               | XM_001002453     | 0.741                                              | -0.324                                               | 0.0003                                           | 0.0005                                                                      | 0.3166                                                                        |
| LOC667832          | NA               | BC089574         | 0.482                                              | -0.344                                               | 0.0102                                           | 0.1760                                                                      | 0.0395                                                                        |
| LOC668166          | NA               | XM_905081        | 0.269                                              | -0.210                                               | 0.0212                                           | 0.0867                                                                      | 0.1643                                                                        |
| LOC668523          | NA               | XR_002193        | 0.212                                              | -0.277                                               | 0.0397                                           | 0.0630                                                                      | 0.3655                                                                        |
| LOC668584          | NA               | XR_002211        | 0.594                                              | -0.349                                               | 0.0102                                           | 0.0163                                                                      | 0.3480                                                                        |
| LOC668600          | NA               | XR_002215        | 0.817                                              | -1.471                                               | 0.0119                                           | 0.1368                                                                      | 0.0606                                                                        |
| LOC668644          | NA               | XM_001002846     | 0.239                                              | -0.450                                               | 0.0201                                           | 0.5824                                                                      | 0.0173                                                                        |
| LOC669267          | NA               | BC042494         | 0.317                                              | -0.241                                               | 0.0413                                           | 0.3850                                                                      | 0.0643                                                                        |
| LOC669344          | NA               | NM_019755        | 0.971                                              | -0.264                                               | 0.0001                                           | 0.0003                                                                      | 0.1706                                                                        |
| LOC669532          | NA               | NM_011368        | 0.461                                              | -0.195                                               | 0.0001                                           | 0.0009                                                                      | 0.0897                                                                        |
| LOC669617          | NA               | NM_010655        | 0.390                                              | -0.235                                               | 0.0043                                           | 0.0212                                                                      | 0.1377                                                                        |
| LOC669789          | NA               | NM_175235        | 0.328                                              | -0.179                                               | 0.0003                                           | 0.0016                                                                      | 0.1258                                                                        |
| LOC669868          | NA               | BC061075         | 0.553                                              | -0.287                                               | 0.0071                                           | 0.0226                                                                      | 0.2012                                                                        |
| LOC669898          | NA               | XM_977845        | 0.710                                              | -0.276                                               | 0.0012                                           | 0.0012                                                                      | 0.4417                                                                        |
| LOC670016          | NA               | NM_145632        | 0.644                                              | -0.423                                               | 0.0337                                           | 0.0575                                                                      | 0.3460                                                                        |
| LOC670122          | NA               | NM_016966        | 0.313                                              | -0.162                                               | 0.0185                                           | 0.2422                                                                      | 0.0498                                                                        |
| LOC670139          | NA               | XR_002822        | 0.383                                              | -0.305                                               | 0.0152                                           | 0.0764                                                                      | 0.1375                                                                        |
| LOC670307          | NA               | AK165191         | 0.416                                              | -0.238                                               | 0.0000                                           | 0.0008                                                                      | 0.0142                                                                        |
| LOC670320          | NA               | NM_008253        | 0.345                                              | -0.376                                               | 0.0413                                           | 0.4043                                                                      | 0.0604                                                                        |
| LOC670948          | NA               | XM_984124        | 0.299                                              | -0.629                                               | 0.0096                                           | 0.2399                                                                      | 0.0261                                                                        |
| LOC670956          | NA               | XM_984124        | 0.313                                              | -0.525                                               | 0.0086                                           | 0.0748                                                                      | 0.0827                                                                        |
| LOC671193          | NA               | XR_001766        | 0.844                                              | -0.276                                               | 0.0216                                           | 0.0143                                                                      | 0.6264                                                                        |
| LOC671202          | NA               | XM_922805        | 0.349                                              | -0.259                                               | 0.0285                                           | 0.0649                                                                      | 0.2742                                                                        |
| LOC671261          | NA               | NM_009342        | 0.446                                              | -0.435                                               | 0.0031                                           | 0.0026                                                                      | 0.4952                                                                        |
| LOC671286          | NA               | AK046045         | 0.402                                              | -0.453                                               | 0.0348                                           | 0.3266                                                                      | 0.0658                                                                        |
| LOC671344          | NA               | XR_003384        | 0.376                                              | -0.193                                               | 0.0431                                           | 0.0521                                                                      | 0.4486                                                                        |
| LOC671359          | NA               | XM_924014        | 0.419                                              | -0.161                                               | 0.0385                                           | 0.0214                                                                      | 0.7128                                                                        |

**Table S1.** Continued.

| <b>Gene Symbol</b> | <b>Gene Name</b> | <b>Entrez ID</b> | <b>Fold Change<br/><i>MECP2</i>-Tg<br/>over WT</b> | <b>Fold Change<br/><i>Mecp2</i>-null<br/>over WT</b> | <b>FDR-<br/>adjusted<br/>p-value<br/>(Total)</b> | <b>FDR-<br/>adjusted<br/>p-value<br/>(<i>MECP2</i>-<br/>Tg over<br/>WT)</b> | <b>FDR-<br/>adjusted<br/>p-value<br/>(<i>Mecp2</i>-<br/>null over<br/>WT)</b> |
|--------------------|------------------|------------------|----------------------------------------------------|------------------------------------------------------|--------------------------------------------------|-----------------------------------------------------------------------------|-------------------------------------------------------------------------------|
| LOC671452          | NA               | AK075970         | 0.425                                              | -0.249                                               | 0.0234                                           | 0.1183                                                                      | 0.1339                                                                        |
| LOC671456          | NA               | NM_198249        | 0.231                                              | -0.211                                               | 0.0362                                           | 0.0484                                                                      | 0.4142                                                                        |
| LOC671551          | NA               | XM_981025        | 0.393                                              | -0.207                                               | 0.0489                                           | 0.1420                                                                      | 0.2195                                                                        |
| LOC671778          | NA               | NM_023231        | 0.440                                              | -0.088                                               | 0.0001                                           | 0.0001                                                                      | 0.4841                                                                        |
| LOC671835          | NA               | XM_899677        | 0.168                                              | -0.415                                               | 0.0000                                           | 0.2886                                                                      | 0.0000                                                                        |
| LOC671972          | NA               | BC110673         | 0.267                                              | -0.301                                               | 0.0325                                           | 0.6367                                                                      | 0.0249                                                                        |
| LOC672170          | NA               | XM_989079        | 0.216                                              | -0.192                                               | 0.0000                                           | 0.0014                                                                      | 0.0137                                                                        |
| LOC672337          | NA               | XM_992735        | 0.714                                              | -0.674                                               | 0.0005                                           | 0.0146                                                                      | 0.0283                                                                        |
| LOC672472          | NA               | NM_146193        | 0.372                                              | -0.185                                               | 0.0040                                           | 0.0240                                                                      | 0.1171                                                                        |
| LOC672587          | NA               | NM_011413        | 0.500                                              | -0.045                                               | 0.0000                                           | 0.0000                                                                      | 0.6831                                                                        |
| LOC672609          | NA               | XM_994751        | 0.502                                              | -0.676                                               | 0.0225                                           | 0.3648                                                                      | 0.0373                                                                        |
| LOC672630          | NA               | NM_019755        | 0.203                                              | -0.377                                               | 0.0069                                           | 0.2000                                                                      | 0.0232                                                                        |
| LOC672697          | NA               | NM_023538        | 0.329                                              | -0.257                                               | 0.0010                                           | 0.0062                                                                      | 0.1096                                                                        |
| LOC672851          | NA               | XM_001001963     | 0.552                                              | -0.705                                               | 0.0055                                           | 0.0902                                                                      | 0.0447                                                                        |
| LOC673071          | NA               | NM_010807        | 0.577                                              | -0.340                                               | 0.0006                                           | 0.0048                                                                      | 0.0945                                                                        |
| LOC673134          | NA               | XM_001004677     | 0.446                                              | -0.613                                               | 0.0374                                           | 0.3938                                                                      | 0.0563                                                                        |
| LOC673188          | NA               | XM_001004903     | 1.066                                              | -0.925                                               | 0.0036                                           | 0.0091                                                                      | 0.2309                                                                        |
| LOC673354          | NA               | XM_001005379     | 0.733                                              | -0.738                                               | 0.0000                                           | 0.0172                                                                      | 0.0008                                                                        |
| LOC673763          | NA               | XM_001006280     | 0.309                                              | -0.544                                               | 0.0121                                           | 0.2828                                                                      | 0.0271                                                                        |
| LOC673890          | NA               | NM_013639        | 0.745                                              | -0.344                                               | 0.0018                                           | 0.0038                                                                      | 0.2616                                                                        |
| LOC673915          | NA               | XM_985651        | 0.199                                              | -0.248                                               | 0.0000                                           | 0.0103                                                                      | 0.0001                                                                        |
| LOC674025          | NA               | AK043477         | 0.439                                              | -0.313                                               | 0.0031                                           | 0.0300                                                                      | 0.0761                                                                        |
| LOC674238          | NA               | XM_973077        | 0.658                                              | -0.291                                               | 0.0278                                           | 0.0352                                                                      | 0.4241                                                                        |
| LOC674321          | NA               | AK003189         | 0.367                                              | -0.236                                               | 0.0089                                           | 0.2428                                                                      | 0.0240                                                                        |
| LOC674483          | NA               | NM_175135        | 0.146                                              | -0.275                                               | 0.0000                                           | 0.1502                                                                      | 0.0001                                                                        |
| LOC674618          | NA               | XM_143339        | 0.604                                              | -0.501                                               | 0.0009                                           | 0.0025                                                                      | 0.2154                                                                        |
| LOC674888          | NA               | AK083331         | 0.265                                              | -0.166                                               | 0.0001                                           | 0.0024                                                                      | 0.0311                                                                        |
| LOC675179          | NA               | BC066844         | 0.686                                              | -0.365                                               | 0.0425                                           | 0.3613                                                                      | 0.0716                                                                        |
| LOC675356          | NA               | XM_976760        | 0.650                                              | -0.658                                               | 0.0000                                           | 0.0000                                                                      | 0.0000                                                                        |
| LOC675521          | NA               | XM_001002732     | 0.340                                              | -0.091                                               | 0.0248                                           | 0.0217                                                                      | 0.5401                                                                        |
| LOC675577          | NA               | XM_983324        | 0.255                                              | -0.218                                               | 0.0185                                           | 0.1327                                                                      | 0.0954                                                                        |
| LOC675608          | NA               | NM_146260        | 0.342                                              | -0.523                                               | 0.0086                                           | 0.0993                                                                      | 0.0622                                                                        |
| LOC675789          | NA               | XM_001001282     | 0.316                                              | -0.531                                               | 0.0439                                           | 0.5976                                                                      | 0.0382                                                                        |
| LOC676620          | NA               | NM_029097        | 0.329                                              | -0.073                                               | 0.0004                                           | 0.0003                                                                      | 0.5126                                                                        |
| LOC676690          | NA               | XM_986626        | 0.404                                              | -0.327                                               | 0.0074                                           | 0.0451                                                                      | 0.1178                                                                        |
| LOC676708          | NA               | NM_010392        | 1.563                                              | -1.780                                               | 0.0031                                           | 0.1055                                                                      | 0.0217                                                                        |
| LOC676779          | NA               | XM_978325        | 0.606                                              | -0.274                                               | 0.0069                                           | 0.0127                                                                      | 0.3084                                                                        |
| LOC677369          | NA               | NM_175628        | 0.346                                              | -0.374                                               | 0.0000                                           | 0.0000                                                                      | 0.0000                                                                        |

**Table S1.** Continued.

| <b>Gene Symbol</b> | <b>Gene Name</b>                                                                     | <b>Entrez ID</b> | <b>Fold Change<br/><i>MECP2</i>-Tg<br/>over WT</b> | <b>Fold Change<br/><i>Mecp2</i>-null<br/>over WT</b> | <b>FDR-<br/>adjusted<br/>p-value<br/>(Total)</b> | <b>FDR-<br/>adjusted<br/>p-value<br/>(<i>MECP2</i>-<br/>Tg over<br/>WT)</b> | <b>FDR-<br/>adjusted<br/>p-value<br/>(<i>Mecp2</i>-<br/>null over<br/>WT)</b> |
|--------------------|--------------------------------------------------------------------------------------|------------------|----------------------------------------------------|------------------------------------------------------|--------------------------------------------------|-----------------------------------------------------------------------------|-------------------------------------------------------------------------------|
| LOC677553          | NA                                                                                   | BC019559         | 0.264                                              | -0.210                                               | 0.0204                                           | 0.0487                                                                      | 0.2638                                                                        |
| LOC677570          | NA                                                                                   | NM_022009        | 0.281                                              | -0.198                                               | 0.0000                                           | 0.0003                                                                      | 0.0020                                                                        |
| Loh11cr2a          | loss of<br>heterozygosity, 11,<br>chromosomal region<br>2, gene A homolog<br>(human) | NM_172767        | 0.744                                              | -0.441                                               | 0.0000                                           | 0.0000                                                                      | 0.0000                                                                        |
| Lpo                | lactoperoxidase                                                                      | NM_080420        | 0.302                                              | -0.178                                               | 0.0004                                           | 0.0021                                                                      | 0.1276                                                                        |
| Lrch2              | leucine-rich repeats<br>and calponin<br>homology (CH)<br>domain containing 2         | XM_978269        | 0.164                                              | -0.246                                               | 0.0000                                           | 0.0186                                                                      | 0.0000                                                                        |
| Lrig1              | leucine-rich repeats<br>and immunoglobulin-<br>like domains 1                        | NM_008377        | 0.283                                              | -0.188                                               | 0.0000                                           | 0.0000                                                                      | 0.0000                                                                        |
| Lrp10              | low-density<br>lipoprotein receptor-<br>related protein 10                           | NM_022993        | 0.489                                              | -0.364                                               | 0.0000                                           | 0.0000                                                                      | 0.0017                                                                        |
| Lrrc18             | NA                                                                                   | NM_026253        | 0.258                                              | -0.225                                               | 0.0454                                           | 0.0821                                                                      | 0.3324                                                                        |
| Lrrc28             | leucine rich repeat<br>containing 28                                                 | AK075909         | 0.347                                              | -0.138                                               | 0.0002                                           | 0.0013                                                                      | 0.1127                                                                        |
| Lrrc41             | leucine rich repeat<br>containing 41                                                 | AK142801         | 0.436                                              | -0.120                                               | 0.0000                                           | 0.0000                                                                      | 0.0368                                                                        |
| Lrrc42             | leucine rich repeat<br>containing 42                                                 | NM_029985        | 0.491                                              | -0.010                                               | 0.0036                                           | 0.0008                                                                      | 0.9757                                                                        |
| Lrrc47             | leucine rich repeat<br>containing 47                                                 | NM_201226        | 0.521                                              | -0.167                                               | 0.0005                                           | 0.0024                                                                      | 0.1410                                                                        |
| Lrrc48             | leucine rich repeat<br>containing 48                                                 | XM_989154        | 0.267                                              | -0.223                                               | 0.0001                                           | 0.0083                                                                      | 0.0058                                                                        |
| Lrrc4b             | leucine rich repeat<br>containing 4B                                                 | NM_198250        | 0.471                                              | -0.133                                               | 0.0120                                           | 0.0087                                                                      | 0.5749                                                                        |
| Lrrc55             | NA                                                                                   | NM_001033346     | 0.216                                              | -0.245                                               | 0.0324                                           | 0.1432                                                                      | 0.1488                                                                        |
| Lrrc56             | NA                                                                                   | AK035366         | 0.171                                              | -0.231                                               | 0.0160                                           | 0.1942                                                                      | 0.0550                                                                        |
| Lrrc6              | leucine rich repeat<br>containing 6 (testis)                                         | NM_019457        | 0.266                                              | -0.286                                               | 0.0105                                           | 0.1650                                                                      | 0.0439                                                                        |
| Lrrcc1             | leucine rich repeat<br>and coiled-coil<br>domain containing 1                        | AK173256         | 0.224                                              | -0.360                                               | 0.0000                                           | 0.0021                                                                      | 0.0000                                                                        |
| Lrrn1              | leucine rich repeat<br>protein 1, neuronal                                           | NM_008516        | 0.352                                              | -0.174                                               | 0.0424                                           | 0.0615                                                                      | 0.3904                                                                        |
| Lrsam1             | leucine rich repeat<br>and sterile alpha<br>motif containing 1                       | NM_199302        | 0.242                                              | -0.172                                               | 0.0000                                           | 0.0000                                                                      | 0.0003                                                                        |

**Table S1.** Continued.

| <b>Gene Symbol</b> | <b>Gene Name</b>                                                                     | <b>Entrez ID</b> | <b>Fold Change<br/><i>MECP2</i>-Tg<br/>over WT</b> | <b>Fold Change<br/><i>Mecp2</i>-null<br/>over WT</b> | <b>FDR-<br/>adjusted<br/>p-value<br/>(Total)</b> | <b>FDR-<br/>adjusted<br/>p-value<br/>(<i>MECP2</i>-<br/>Tg over<br/>WT)</b> | <b>FDR-<br/>adjusted<br/>p-value<br/>(<i>Mecp2</i>-<br/>null over<br/>WT)</b> |
|--------------------|--------------------------------------------------------------------------------------|------------------|----------------------------------------------------|------------------------------------------------------|--------------------------------------------------|-----------------------------------------------------------------------------|-------------------------------------------------------------------------------|
| Lsm11              | U7 snRNP-specific<br>Sm-like protein<br>LSM11                                        | NM_028185        | 0.246                                              | -0.182                                               | 0.0081                                           | 0.1918                                                                      | 0.0286                                                                        |
| Lsm8               | LSM8 homolog, U6<br>small nuclear RNA<br>associated (S.<br>cerevisiae)               | AK154446         | 0.678                                              | -0.189                                               | 0.0161                                           | 0.0173                                                                      | 0.4614                                                                        |
| Ltbr               | lymphotoxin B<br>receptor                                                            | NM_010736        | 0.518                                              | -0.080                                               | 0.0019                                           | 0.0009                                                                      | 0.6634                                                                        |
| Ly6h               | lymphocyte antigen 6<br>complex, locus H                                             | AK034884         | 0.873                                              | -0.336                                               | 0.0001                                           | 0.0494                                                                      | 0.0018                                                                        |
| Ly96               | lymphocyte antigen<br>96                                                             | NM_016923        | 0.487                                              | -0.250                                               | 0.0492                                           | 0.0472                                                                      | 0.5271                                                                        |
| Lyn                | Yamaguchi sarcoma<br>viral (v-yes-1)<br>oncogene homolog                             | BC031547         | 0.443                                              | -0.078                                               | 0.0016                                           | 0.0006                                                                      | 0.7439                                                                        |
| Lypla3             | lysophospholipase 3                                                                  | AK129099         | 0.236                                              | -0.269                                               | 0.0126                                           | 0.3381                                                                      | 0.0229                                                                        |
| Lyzs               | lysozyme                                                                             | NM_017372        | 0.849                                              | -0.429                                               | 0.0002                                           | 0.0017                                                                      | 0.0773                                                                        |
| Lztr1              | leucine-zipper-like<br>transcriptional<br>regulator, 1                               | AK132817         | 0.414                                              | -0.100                                               | 0.0000                                           | 0.0000                                                                      | 0.0021                                                                        |
| M6pr-ps            | NA                                                                                   | AK004656         | 0.337                                              | -0.120                                               | 0.0137                                           | 0.0469                                                                      | 0.1937                                                                        |
| Mad2l2             | MAD2 mitotic arrest<br>deficient-like 2<br>(yeast)                                   | BC071264         | 0.405                                              | -0.103                                               | 0.0046                                           | 0.0058                                                                      | 0.3903                                                                        |
| Mafg               | v-maf<br>musculoaponeurotic<br>fibrosarcoma<br>oncogene family,<br>protein G (avian) | XM_001002362     | 0.432                                              | -0.083                                               | 0.0466                                           | 0.0380                                                                      | 0.5805                                                                        |
| Mafk               | v-maf<br>musculoaponeurotic<br>fibrosarcoma<br>oncogene family,<br>protein K (avian) | NM_010757        | 0.406                                              | -0.235                                               | 0.0471                                           | 0.0717                                                                      | 0.3786                                                                        |
| Maged2             | melanoma antigen,<br>family D, 2                                                     | AK131598         | 0.461                                              | -0.241                                               | 0.0000                                           | 0.0009                                                                      | 0.0190                                                                        |
| Magee2             | NA                                                                                   | NM_053206        | 0.553                                              | -0.391                                               | 0.0371                                           | 0.0566                                                                      | 0.3764                                                                        |
| Magoh              | mago-nashi homolog,<br>proliferation-<br>associated<br>(Drosophila)                  | NM_010760        | 0.957                                              | -0.205                                               | 0.0024                                           | 0.0025                                                                      | 0.4227                                                                        |

**Table S1.** Continued.

| <b>Gene Symbol</b> | <b>Gene Name</b>                                                                    | <b>Entrez ID</b> | <b>Fold Change<br/><i>MECP2</i>-Tg<br/>over WT</b> | <b>Fold Change<br/><i>Mecp2</i>-null<br/>over WT</b> | <b>FDR-<br/>adjusted<br/>p-value<br/>(Total)</b> | <b>FDR-<br/>adjusted<br/>p-value<br/>(<i>MECP2</i>-<br/>Tg over<br/>WT)</b> | <b>FDR-<br/>adjusted<br/>p-value<br/>(<i>Mecp2</i>-<br/>null over<br/>WT)</b> |
|--------------------|-------------------------------------------------------------------------------------|------------------|----------------------------------------------------|------------------------------------------------------|--------------------------------------------------|-----------------------------------------------------------------------------|-------------------------------------------------------------------------------|
| Mak10              | MAK10 homolog,<br>amino-acid N-<br>acetyltransferase<br>subunit, (S.<br>cerevisiae) | NM_030153        | 0.273                                              | -0.171                                               | 0.0000                                           | 0.0002                                                                      | 0.0002                                                                        |
| Mal2               | mal, T-cell<br>differentiation<br>protein 2                                         | NM_178920        | 0.292                                              | -0.258                                               | 0.0186                                           | 0.1772                                                                      | 0.0706                                                                        |
| Man1a              | mannosidase 1, alpha                                                                | NM_008548        | 0.353                                              | -0.208                                               | 0.0000                                           | 0.0000                                                                      | 0.0653                                                                        |
| Man2b1             | mannosidase 2, alpha<br>B1                                                          | AK054315         | 0.283                                              | -0.160                                               | 0.0000                                           | 0.0000                                                                      | 0.0000                                                                        |
| Map1lc3a           | microtubule-<br>associated protein 1<br>light chain 3 alpha                         | NM_025735        | 0.501                                              | -0.302                                               | 0.0000                                           | 0.0034                                                                      | 0.0062                                                                        |
| Map2k2             | mitogen activated<br>protein kinase kinase<br>2                                     | NM_023138        | 0.395                                              | -0.014                                               | 0.0003                                           | 0.0001                                                                      | 0.8915                                                                        |
| Map2k3             | mitogen activated<br>protein kinase kinase<br>3                                     | AK176968         | 0.336                                              | -0.244                                               | 0.0002                                           | 0.0011                                                                      | 0.0996                                                                        |
| Map6d1             | NA                                                                                  | NM_198599        | 0.360                                              | -0.251                                               | 0.0247                                           | 0.0761                                                                      | 0.2111                                                                        |
| Mapk11             | mitogen-activated<br>protein kinase 11                                              | BC057626         | 0.280                                              | -0.270                                               | 0.0000                                           | 0.0000                                                                      | 0.0001                                                                        |
| Mapk3              | mitogen activated<br>protein kinase 3                                               | AK155287         | 0.367                                              | -0.265                                               | 0.0000                                           | 0.0000                                                                      | 0.0000                                                                        |
| Mapk8ip1           | mitogen activated<br>protein kinase 8<br>interacting protein 1                      | NM_011162        | 0.314                                              | -0.106                                               | 0.0000                                           | 0.0000                                                                      | 0.0436                                                                        |
| March9             | membrane-associated<br>ring finger (C3HC4)9                                         | NM_001033262     | 0.577                                              | -0.166                                               | 0.0000                                           | 0.0001                                                                      | 0.2604                                                                        |
| Marcks             | myristoylated alanine<br>rich protein kinase C<br>substrate                         | NM_008538        | 0.279                                              | -0.267                                               | 0.0187                                           | 0.1680                                                                      | 0.0750                                                                        |
| Marcks11           | NA                                                                                  | NM_010807        | 1.083                                              | -0.582                                               | 0.0084                                           | 0.1059                                                                      | 0.0565                                                                        |
| Mars               | methionine-tRNA<br>synthetase                                                       | NM_001003913     | 0.342                                              | -0.068                                               | 0.0000                                           | 0.0000                                                                      | 0.1817                                                                        |
| Mast3              | microtubule<br>associated<br>serine/threonine<br>kinase 3                           | XM_897954        | 0.388                                              | -0.086                                               | 0.0003                                           | 0.0004                                                                      | 0.3481                                                                        |
| Matn2              | matrilin 2                                                                          | NM_016762        | 0.422                                              | -0.053                                               | 0.0000                                           | 0.0000                                                                      | 0.8363                                                                        |
| Matn4              | matrilin 4                                                                          | NM_013592        | 0.444                                              | -0.306                                               | 0.0000                                           | 0.0001                                                                      | 0.0037                                                                        |

**Table S1.** Continued.

| <b>Gene Symbol</b> | <b>Gene Name</b>                                                       | <b>Entrez ID</b> | <b>Fold Change<br/><i>MECP2</i>-Tg<br/>over WT</b> | <b>Fold Change<br/><i>Mecp2</i>-null<br/>over WT</b> | <b>FDR-<br/>adjusted<br/>p-value<br/>(Total)</b> | <b>FDR-<br/>adjusted<br/>p-value<br/>(<i>MECP2</i>-<br/>Tg over<br/>WT)</b> | <b>FDR-<br/>adjusted<br/>p-value<br/>(<i>Mecp2</i>-<br/>null over<br/>WT)</b> |
|--------------------|------------------------------------------------------------------------|------------------|----------------------------------------------------|------------------------------------------------------|--------------------------------------------------|-----------------------------------------------------------------------------|-------------------------------------------------------------------------------|
| Mbc2               | membrane bound C2 domain containing protein                            | NM_011843        | 0.373                                              | -0.342                                               | 0.0000                                           | 0.0000                                                                      | 0.0000                                                                        |
| Mbtd1              | mbt domain containing 1                                                | NM_134012        | 0.361                                              | -0.149                                               | 0.0000                                           | 0.0000                                                                      | 0.0204                                                                        |
| Mcee               | methylmalonyl CoA epimerase                                            | NM_028626        | 0.350                                              | -0.478                                               | 0.0000                                           | 0.1069                                                                      | 0.0003                                                                        |
| Mcm7               | minichromosome maintenance deficient 7 (S. cerevisiae)                 | XR_004013        | 0.361                                              | -0.161                                               | 0.0119                                           | 0.0200                                                                      | 0.3370                                                                        |
| Mcoln1             | mucolipin 1                                                            | BC020377         | 0.412                                              | -0.029                                               | 0.0000                                           | 0.0000                                                                      | 0.7565                                                                        |
| Mcph1              | microcephaly, primary autosomal recessive 1                            | AK148021         | 0.236                                              | -0.270                                               | 0.0001                                           | 0.0296                                                                      | 0.0042                                                                        |
| Mdga1              | MAM domain containing glycosylphosphatidyl inositol anchor 1           | DQ788983         | 0.540                                              | -0.192                                               | 0.0000                                           | 0.0000                                                                      | 0.0002                                                                        |
| Mecp2              | methyl CpG binding protein 2                                           | NM_010788        | 0.429                                              | -2.450                                               | 0.0015                                           | 0.0570                                                                      | 0.0202                                                                        |
| Med6               | mediator of RNA polymerase II transcription, subunit 6 homolog (yeast) | AK037414         | 0.499                                              | -0.161                                               | 0.0000                                           | 0.0002                                                                      | 0.0738                                                                        |
| Men1               | multiple endocrine neoplasia 1                                         | BC006610         | 0.370                                              | -0.179                                               | 0.0000                                           | 0.0000                                                                      | 0.0072                                                                        |
| Metrn              | meteorin, glial cell differentiation regulator                         | DQ133463         | 0.519                                              | -0.129                                               | 0.0399                                           | 0.0473                                                                      | 0.4530                                                                        |
| Mfge8              | milk fat globule-EGF factor 8 protein                                  | NM_008594        | 0.244                                              | -0.203                                               | 0.0001                                           | 0.0157                                                                      | 0.0032                                                                        |
| Mfn1               | mitofusin 1                                                            | NM_024200        | 0.265                                              | -0.140                                               | 0.0000                                           | 0.0000                                                                      | 0.0034                                                                        |
| Mfsd1              | major facilitator superfamily domain containing 1                      | NM_025813        | 0.366                                              | -0.147                                               | 0.0000                                           | 0.0000                                                                      | 0.0022                                                                        |
| Mfsd2              | major facilitator superfamily domain containing 2                      | NM_029662        | 0.291                                              | -0.306                                               | 0.0000                                           | 0.0016                                                                      | 0.0000                                                                        |
| Mgat4b             | mannoside acetylglucosaminyltransferase 4, isoenzyme B                 | NM_145926        | 0.435                                              | -0.034                                               | 0.0000                                           | 0.0000                                                                      | 0.7303                                                                        |
| Mgat4c             | NA                                                                     | AK032009         | 0.164                                              | -0.380                                               | 0.0245                                           | 0.5028                                                                      | 0.0263                                                                        |



**Table S1.** Continued.

| <b>Gene Symbol</b> | <b>Gene Name</b>                                                          | <b>Entrez ID</b> | <b>Fold Change<br/><i>MECP2</i>-Tg<br/>over WT</b> | <b>Fold Change<br/><i>Mecp2</i>-null<br/>over WT</b> | <b>FDR-<br/>adjusted<br/>p-value<br/>(Total)</b> | <b>FDR-<br/>adjusted<br/>p-value<br/>(<i>MECP2</i>-<br/>Tg over<br/>WT)</b> | <b>FDR-<br/>adjusted<br/>p-value<br/>(<i>Mecp2</i>-<br/>null over<br/>WT)</b> |
|--------------------|---------------------------------------------------------------------------|------------------|----------------------------------------------------|------------------------------------------------------|--------------------------------------------------|-----------------------------------------------------------------------------|-------------------------------------------------------------------------------|
| Mgat5b             | NA                                                                        | NM_172948        | 0.317                                              | -0.107                                               | 0.0000                                           | 0.0000                                                                      | 0.0103                                                                        |
| MGC107415          | NA                                                                        | BC096765         | 0.666                                              | -0.918                                               | 0.0017                                           | 0.3345                                                                      | 0.0028                                                                        |
| MGC38507           | NA                                                                        | XM_001004775     | 0.329                                              | -0.302                                               | 0.0345                                           | 0.3884                                                                      | 0.0527                                                                        |
| Mgst1              | microsomal<br>glutathione S-<br>transferase 1                             | NM_019946        | 0.530                                              | -0.188                                               | 0.0474                                           | 0.0653                                                                      | 0.4076                                                                        |
| Mia1               | melanoma inhibitory<br>activity 1                                         | BC009815         | 0.583                                              | -0.225                                               | 0.0004                                           | 0.0019                                                                      | 0.1430                                                                        |
| Midn               | midnolin                                                                  | NM_021565        | 0.463                                              | -0.200                                               | 0.0000                                           | 0.0000                                                                      | 0.0009                                                                        |
| Mif4gd             | NA                                                                        | NM_027162        | 0.379                                              | -0.127                                               | 0.0001                                           | 0.0001                                                                      | 0.2349                                                                        |
| Mina               | myc induced nuclear<br>antigen                                            | AK014426         | 0.259                                              | -0.259                                               | 0.0001                                           | 0.0050                                                                      | 0.0142                                                                        |
| Mis12              | MIS12 homolog<br>(yeast)                                                  | NM_025993        | 0.264                                              | -0.170                                               | 0.0401                                           | 0.1772                                                                      | 0.1478                                                                        |
| Mkks               | McKusick-Kaufman<br>syndrome protein                                      | NM_021527        | 0.427                                              | -0.091                                               | 0.0092                                           | 0.0058                                                                      | 0.6157                                                                        |
| Mknk2              | MAP kinase-<br>interacting<br>serine/threonine<br>kinase 2                | AK154235         | 0.320                                              | -0.157                                               | 0.0000                                           | 0.0000                                                                      | 0.0097                                                                        |
| Mlfl               | myeloid leukemia<br>factor 1                                              | AF009515         | 0.484                                              | -0.315                                               | 0.0007                                           | 0.0052                                                                      | 0.1002                                                                        |
| Mme                | membrane metallo<br>endopeptidase                                         | AK033824         | 0.382                                              | -0.697                                               | 0.0000                                           | 0.0000                                                                      | 0.0000                                                                        |
| Mmp14              | matrix<br>metallopeptidase 14<br>(membrane-inserted)                      | AK040968         | 0.478                                              | -0.217                                               | 0.0000                                           | 0.0001                                                                      | 0.0191                                                                        |
| Mmp15              | matrix<br>metallopeptidase 15                                             | NM_008609        | 0.406                                              | -0.405                                               | 0.0000                                           | 0.0000                                                                      | 0.0000                                                                        |
| Mnt                | max binding protein                                                       | XR_003956        | 0.362                                              | -0.334                                               | 0.0300                                           | 0.2322                                                                      | 0.0839                                                                        |
| Mobk11a            | MOB1, Mps One<br>Binder kinase<br>activator-like 1A<br>(yeast)            | AK003346         | 0.340                                              | -0.112                                               | 0.0492                                           | 0.0487                                                                      | 0.5165                                                                        |
| Morc3              | microrchidia 3                                                            | NM_001045529     | 0.289                                              | -0.218                                               | 0.0000                                           | 0.0002                                                                      | 0.0006                                                                        |
| Mospd1             | motile sperm domain<br>containing 1                                       | NM_027409        | 0.385                                              | -0.280                                               | 0.0007                                           | 0.0095                                                                      | 0.0575                                                                        |
| Mospd2             | motile sperm domain<br>containing 2                                       | NM_029730        | 0.320                                              | -0.235                                               | 0.0011                                           | 0.0235                                                                      | 0.0360                                                                        |
| Mpp2               | membrane protein,<br>palmitoylated 2<br>(MAGUK p55<br>subfamily member 2) | NM_016695        | 0.375                                              | -0.220                                               | 0.0000                                           | 0.0000                                                                      | 0.0000                                                                        |

**Table S1.** Continued.

| <b>Gene Symbol</b> | <b>Gene Name</b>                                        | <b>Entrez ID</b> | <b>Fold Change<br/><i>MECP2</i>-Tg<br/>over WT</b> | <b>Fold Change<br/><i>Mecp2</i>-null<br/>over WT</b> | <b>FDR-<br/>adjusted<br/>p-value<br/>(Total)</b> | <b>FDR-<br/>adjusted<br/>p-value<br/>(<i>MECP2</i>-<br/>Tg over<br/>WT)</b> | <b>FDR-<br/>adjusted<br/>p-value<br/>(<i>Mecp2</i>-<br/>null over<br/>WT)</b> |
|--------------------|---------------------------------------------------------|------------------|----------------------------------------------------|------------------------------------------------------|--------------------------------------------------|-----------------------------------------------------------------------------|-------------------------------------------------------------------------------|
| Mrc1               | mannose receptor, C type 1                              | NM_008625        | 0.388                                              | -0.140                                               | 0.0000                                           | 0.0000                                                                      | 0.1443                                                                        |
| Mrg2               | myeloid ecotropic viral integration site-related gene 2 | XM_983187        | 0.292                                              | -0.282                                               | 0.0007                                           | 0.0749                                                                      | 0.0077                                                                        |
| Mrm1               | NA                                                      | NM_145433        | 0.378                                              | -0.144                                               | 0.0076                                           | 0.0078                                                                      | 0.4559                                                                        |
| Mrpl1              | mitochondrial ribosomal protein L1                      | BC061042         | 0.258                                              | -0.166                                               | 0.0026                                           | 0.0161                                                                      | 0.1126                                                                        |
| Mrpl23             | mitochondrial ribosomal protein L23                     | NM_011288        | 0.198                                              | -0.263                                               | 0.0012                                           | 0.2796                                                                      | 0.0025                                                                        |
| Mrpl24             | mitochondrial ribosomal protein L24                     | BC025506         | 0.303                                              | -0.364                                               | 0.0001                                           | 0.1594                                                                      | 0.0006                                                                        |
| Mrpl43             | mitochondrial ribosomal protein L43                     | NM_053164        | 0.479                                              | -0.120                                               | 0.0381                                           | 0.0528                                                                      | 0.4037                                                                        |
| Mrpl46             | mitochondrial ribosomal protein L46                     | NM_023331        | 0.275                                              | -0.289                                               | 0.0038                                           | 0.2182                                                                      | 0.0112                                                                        |
| Mrpl53             | mitochondrial ribosomal protein L53                     | XM_620337        | 0.446                                              | -0.245                                               | 0.0329                                           | 0.1236                                                                      | 0.1741                                                                        |
| Mrps10             | mitochondrial ribosomal protein S10                     | AK004151         | 0.375                                              | -0.085                                               | 0.0052                                           | 0.0024                                                                      | 0.7113                                                                        |
| Mrps18a            | mitochondrial ribosomal protein S18A                    | NM_026768        | 0.401                                              | -0.154                                               | 0.0005                                           | 0.0028                                                                      | 0.1135                                                                        |
| Mrps18c            | mitochondrial ribosomal protein S18C                    | NM_026826        | 0.491                                              | -0.149                                               | 0.0106                                           | 0.0232                                                                      | 0.2761                                                                        |
| Mrps21             | mitochondrial ribosomal protein S21                     | NM_078479        | 0.892                                              | -0.270                                               | 0.0248                                           | 0.3040                                                                      | 0.0512                                                                        |
| Mrps22             | mitochondrial ribosomal protein S22                     | BC037653         | 0.488                                              | -0.316                                               | 0.0003                                           | 0.0082                                                                      | 0.0311                                                                        |
| Mrps25             | mitochondrial ribosomal protein S25                     | NM_025578        | 0.377                                              | -0.202                                               | 0.0003                                           | 0.0095                                                                      | 0.0227                                                                        |
| Mrps27             | mitochondrial ribosomal protein S27                     | AK172922         | 0.325                                              | -0.250                                               | 0.0000                                           | 0.0023                                                                      | 0.0064                                                                        |

**Table S1.** Continued.

| <b>Gene Symbol</b> | <b>Gene Name</b>                                           | <b>Entrez ID</b> | <b>Fold Change<br/><i>MECP2</i>-Tg<br/>over WT</b> | <b>Fold Change<br/><i>Mecp2</i>-null<br/>over WT</b> | <b>FDR-<br/>adjusted<br/>p-value<br/>(Total)</b> | <b>FDR-<br/>adjusted<br/>p-value<br/>(<i>MECP2</i>-<br/>Tg over<br/>WT)</b> | <b>FDR-<br/>adjusted<br/>p-value<br/>(<i>Mecp2</i>-<br/>null over<br/>WT)</b> |
|--------------------|------------------------------------------------------------|------------------|----------------------------------------------------|------------------------------------------------------|--------------------------------------------------|-----------------------------------------------------------------------------|-------------------------------------------------------------------------------|
| Mrps31             | mitochondrial<br>ribosomal protein<br>S31                  | NM_020560        | 0.441                                              | -0.280                                               | 0.0003                                           | 0.0071                                                                      | 0.0364                                                                        |
| Msr2               | macrophage<br>scavenger receptor 2                         | NM_030707        | 0.225                                              | -0.306                                               | 0.0074                                           | 0.2011                                                                      | 0.0249                                                                        |
| Msto1              | misato homolog 1<br>(Drosophila)                           | NM_144898        | 0.292                                              | -0.129                                               | 0.0000                                           | 0.0042                                                                      | 0.0020                                                                        |
| Mtch1              | mitochondrial carrier<br>homolog 1 (C.<br><i>elegans</i> ) | BC029723         | 0.349                                              | -0.100                                               | 0.0000                                           | 0.0000                                                                      | 0.0204                                                                        |
| Mterfd2            | MTERF domain<br>containing 2                               | NM_178051        | 0.308                                              | -0.095                                               | 0.0023                                           | 0.0009                                                                      | 0.7268                                                                        |
| Mthfr              | 5,10-<br>methylenetetrahydrof<br>olate reductase           | AF404274         | 0.328                                              | -0.165                                               | 0.0000                                           | 0.0001                                                                      | 0.0026                                                                        |
| Mtmr11             | myotubularin related<br>protein 11                         | NM_181409        | 0.616                                              | -0.363                                               | 0.0000                                           | 0.0000                                                                      | 0.0000                                                                        |
| Mttp               | microsomal<br>triglyceride transfer<br>protein             | NM_008642        | 0.229                                              | -0.459                                               | 0.0000                                           | 0.0612                                                                      | 0.0000                                                                        |
| Mtvr2              | mammary tumor<br>virus receptor 2                          | NM_023166        | 0.453                                              | -0.147                                               | 0.0360                                           | 0.1177                                                                      | 0.1974                                                                        |
| Mtx2               | metaxin 2                                                  | NM_016804        | 0.497                                              | -0.099                                               | 0.0018                                           | 0.0023                                                                      | 0.3744                                                                        |
| Mulk               | multiple substrate<br>lipid kinase                         | AK051531         | 0.141                                              | -0.275                                               | 0.0023                                           | 0.3174                                                                      | 0.0042                                                                        |
| Mvd                | mevalonate<br>(diphospho)<br>decarboxylase                 | AK153439         | 0.322                                              | -0.111                                               | 0.0104                                           | 0.0223                                                                      | 0.2792                                                                        |
| Mxd1               | NA                                                         | AK036504         | 0.261                                              | -0.186                                               | 0.0194                                           | 0.0948                                                                      | 0.1391                                                                        |
| Myc                | myelocytomatosis<br>oncogene                               | NM_010849        | 0.367                                              | -0.192                                               | 0.0206                                           | 0.0690                                                                      | 0.1955                                                                        |
| Mycbp              | c-myc binding<br>protein                                   | NM_019660        | 0.580                                              | -0.378                                               | 0.0003                                           | 0.0057                                                                      | 0.0393                                                                        |
| Mycl1              | NA                                                         | NM_008506        | 0.619                                              | -0.222                                               | 0.0003                                           | 0.0033                                                                      | 0.0700                                                                        |
| Myl6b              | NA                                                         | NM_172259        | 0.324                                              | -0.350                                               | 0.0008                                           | 0.1157                                                                      | 0.0050                                                                        |
| Myo1c              | myosin IC                                                  | NM_008659        | 0.322                                              | -0.184                                               | 0.0000                                           | 0.0000                                                                      | 0.0000                                                                        |
| Myo3b              | NA                                                         | NM_177376        | 0.404                                              | -0.081                                               | 0.0000                                           | 0.0000                                                                      | 0.4149                                                                        |
| Myt1               | myelin transcription<br>factor 1                           | NM_008665        | 0.183                                              | -0.242                                               | 0.0000                                           | 0.0049                                                                      | 0.0000                                                                        |
| Nagk               | N-acetylglucosamine<br>kinase                              | AJ242911         | 0.151                                              | -0.297                                               | 0.0002                                           | 0.5096                                                                      | 0.0001                                                                        |

**Table S1.** Continued.

| <b>Gene Symbol</b> | <b>Gene Name</b>                                            | <b>Entrez ID</b> | <b>Fold Change<br/><i>MECP2</i>-Tg<br/>over WT</b> | <b>Fold Change<br/><i>Mecp2</i>-null<br/>over WT</b> | <b>FDR-<br/>adjusted<br/>p-value<br/>(Total)</b> | <b>FDR-<br/>adjusted<br/>p-value<br/>(<i>MECP2</i>-<br/>Tg over<br/>WT)</b> | <b>FDR-<br/>adjusted<br/>p-value<br/>(<i>Mecp2</i>-<br/>null over<br/>WT)</b> |
|--------------------|-------------------------------------------------------------|------------------|----------------------------------------------------|------------------------------------------------------|--------------------------------------------------|-----------------------------------------------------------------------------|-------------------------------------------------------------------------------|
| Naglu              | alpha-N-acetylglucosaminidase (Sanfilippo disease IIIB)     | AK158774         | 0.305                                              | -0.130                                               | 0.0084                                           | 0.0226                                                                      | 0.2323                                                                        |
| Nalp5              | NACHT, leucine rich repeat and PYD containing 5             | NM_011860        | 0.295                                              | -0.397                                               | 0.0261                                           | 0.2285                                                                      | 0.0746                                                                        |
| Nanos1             | nanos homolog 1 (Drosophila)                                | NM_178421        | 0.316                                              | -0.200                                               | 0.0347                                           | 0.0848                                                                      | 0.2580                                                                        |
| Narg11             | NMDA receptor regulated 1-like                              | NM_025832        | 0.334                                              | -0.164                                               | 0.0001                                           | 0.0008                                                                      | 0.0644                                                                        |
| Nasp               | nuclear autoantigenic sperm protein (histone-binding)       | AK008295         | 0.260                                              | -0.183                                               | 0.0000                                           | 0.0013                                                                      | 0.0243                                                                        |
| Nat5               | N-acetyltransferase 5 (ARD1 homolog, <i>S. cerevisiae</i> ) | AK046153         | 0.455                                              | -0.169                                               | 0.0433                                           | 0.2340                                                                      | 0.1195                                                                        |
| Nat6               | N-acetyltransferase 6                                       | NM_008317        | 0.265                                              | -0.225                                               | 0.0043                                           | 0.1107                                                                      | 0.0283                                                                        |
| Nck1               | non-catalytic region of tyrosine kinase adaptor protein 1   | AF043259         | 0.376                                              | -0.144                                               | 0.0492                                           | 0.0422                                                                      | 0.5642                                                                        |
| Nckap11            | NCK associated protein 1 like                               | AK077019         | 0.232                                              | -0.196                                               | 0.0000                                           | 0.0007                                                                      | 0.0011                                                                        |
| Ncln               | nicalin homolog (zebrafish)                                 | NM_134009        | 0.404                                              | -0.134                                               | 0.0000                                           | 0.0000                                                                      | 0.0524                                                                        |
| Ndph               | Norrie disease homolog                                      | NM_010883        | 0.466                                              | -0.108                                               | 0.0049                                           | 0.0113                                                                      | 0.2542                                                                        |
| Ndst3              | N-deacetylase/N-sulfotransferase (heparan glucosaminyl) 3   | AK015768         | 0.143                                              | -0.397                                               | 0.0000                                           | 0.1796                                                                      | 0.0000                                                                        |
| Ndufa3             | NADH dehydrogenase (ubiquinone) 1 alpha subcomplex, 3       | BC061002         | 0.235                                              | -0.202                                               | 0.0166                                           | 0.5090                                                                      | 0.0173                                                                        |
| Ndufa9             | NADH dehydrogenase (ubiquinone) 1 alpha subcomplex, 9       | NM_025358        | 0.278                                              | -0.137                                               | 0.0003                                           | 0.0250                                                                      | 0.0092                                                                        |
| Ndufb10            | NADH dehydrogenase (ubiquinone) 1 beta subcomplex, 10       | AK151404         | 0.303                                              | -0.249                                               | 0.0186                                           | 0.3480                                                                      | 0.0323                                                                        |

**Table S1.** Continued.

| <b>Gene Symbol</b> | <b>Gene Name</b>                                                                                | <b>Entrez ID</b> | <b>Fold Change<br/><i>MECP2</i>-Tg<br/>over WT</b> | <b>Fold Change<br/><i>Mecp2</i>-null<br/>over WT</b> | <b>FDR-<br/>adjusted<br/>p-value<br/>(Total)</b> | <b>FDR-<br/>adjusted<br/>p-value<br/>(<i>MECP2</i>-<br/>Tg over<br/>WT)</b> | <b>FDR-<br/>adjusted<br/>p-value<br/>(<i>Mecp2</i>-<br/>null over<br/>WT)</b> |
|--------------------|-------------------------------------------------------------------------------------------------|------------------|----------------------------------------------------|------------------------------------------------------|--------------------------------------------------|-----------------------------------------------------------------------------|-------------------------------------------------------------------------------|
| Ndufb2             | NADH<br>dehydrogenase<br>(ubiquinone) 1 beta<br>subcomplex, 2                                   | AK028334         | 0.533                                              | -0.264                                               | 0.0151                                           | 0.1235                                                                      | 0.0848                                                                        |
| Ndufb8             | NADH<br>dehydrogenase<br>(ubiquinone) 1 beta<br>subcomplex 8                                    | AK028070         | 0.373                                              | -0.217                                               | 0.0001                                           | 0.0853                                                                      | 0.0009                                                                        |
| Ndufs7             | NADH<br>dehydrogenase<br>(ubiquinone) Fe-S<br>protein 7                                         | NM_029272        | 0.359                                              | -0.045                                               | 0.0372                                           | 0.0191                                                                      | 0.7417                                                                        |
| Ndufv2             | NADH<br>dehydrogenase<br>(ubiquinone)<br>flavoprotein 2                                         | NM_028388        | 0.284                                              | -0.140                                               | 0.0061                                           | 0.0286                                                                      | 0.1475                                                                        |
| Nedd8              | neural precursor cell<br>expressed,<br>developmentally<br>down-regulated gene<br>8              | NM_008683        | 0.511                                              | -0.124                                               | 0.0305                                           | 0.1192                                                                      | 0.1681                                                                        |
| Nek10              | NA                                                                                              | XM_977876        | 0.322                                              | -0.437                                               | 0.0003                                           | 0.0480                                                                      | 0.0049                                                                        |
| Neto2              | neuroligin (NRP) and<br>tolloid (TLL)-like 2                                                    | BC068168         | 0.147                                              | -0.268                                               | 0.0002                                           | 0.2141                                                                      | 0.0006                                                                        |
| Neu4               | NA                                                                                              | NM_173772        | 0.376                                              | -0.356                                               | 0.0000                                           | 0.0192                                                                      | 0.0003                                                                        |
| Nf2                | neurofibromatosis 2                                                                             | BC005442         | 0.303                                              | -0.099                                               | 0.0000                                           | 0.0001                                                                      | 0.0893                                                                        |
| Nfkbil2            | nuclear factor of<br>kappa light<br>polypeptide gene<br>enhancer in B-cells<br>inhibitor-like 2 | AK139173         | 0.424                                              | -0.288                                               | 0.0000                                           | 0.0000                                                                      | 0.0000                                                                        |
| Ngb                | neuroglobin                                                                                     | NM_022414        | 0.233                                              | -0.471                                               | 0.0000                                           | 0.0083                                                                      | 0.0008                                                                        |
| Nhs                | NA                                                                                              | XM_912343        | 0.133                                              | -0.271                                               | 0.0273                                           | 0.3425                                                                      | 0.0491                                                                        |
| Nhs1               | NHS-like 1                                                                                      | NM_173390        | 0.681                                              | -0.225                                               | 0.0333                                           | 0.0421                                                                      | 0.4275                                                                        |
| Nif311             | Ngg1 interacting<br>factor 3-like 1 ( <i>S.</i><br><i>pombe</i> )                               | NM_022988        | 0.320                                              | -0.193                                               | 0.0041                                           | 0.0589                                                                      | 0.0514                                                                        |
| Nipsnap3a          | nipsnap homolog 3A<br>( <i>C. elegans</i> )                                                     | NM_025623        | 0.147                                              | -0.318                                               | 0.0018                                           | 0.4273                                                                      | 0.0022                                                                        |
| Nit1               | NA                                                                                              | NM_012049        | 0.282                                              | -0.132                                               | 0.0077                                           | 0.0356                                                                      | 0.1477                                                                        |
| Nmbr               | neuromedin B<br>receptor                                                                        | NM_008703        | 0.810                                              | -0.382                                               | 0.0000                                           | 0.0005                                                                      | 0.0077                                                                        |

**Table S1.** Continued.

| <b>Gene Symbol</b> | <b>Gene Name</b>                                                      | <b>Entrez ID</b> | <b>Fold Change<br/><i>MECP2</i>-Tg<br/>over WT</b> | <b>Fold Change<br/><i>Mecp2</i>-null<br/>over WT</b> | <b>FDR-<br/>adjusted<br/>p-value<br/>(Total)</b> | <b>FDR-<br/>adjusted<br/>p-value<br/>(<i>MECP2</i>-<br/>Tg over<br/>WT)</b> | <b>FDR-<br/>adjusted<br/>p-value<br/>(<i>Mecp2</i>-<br/>null over<br/>WT)</b> |
|--------------------|-----------------------------------------------------------------------|------------------|----------------------------------------------------|------------------------------------------------------|--------------------------------------------------|-----------------------------------------------------------------------------|-------------------------------------------------------------------------------|
| Nme1               | expressed in non-<br>metastatic cells 1,<br>protein                   | AK034899         | 0.525                                              | -0.224                                               | 0.0002                                           | 0.0076                                                                      | 0.0235                                                                        |
| Nme3               | expressed in non-<br>metastatic cells 3                               | NM_019730        | 0.401                                              | -0.227                                               | 0.0061                                           | 0.0183                                                                      | 0.2095                                                                        |
| Nme5               | expressed in non-<br>metastatic cells 5                               | BC049625         | 0.347                                              | -0.371                                               | 0.0000                                           | 0.0159                                                                      | 0.0013                                                                        |
| Noc4l              | nucleolar complex<br>associated 4 homolog<br>( <i>S. cerevisiae</i> ) | AK184847         | 0.436                                              | -0.160                                               | 0.0000                                           | 0.0000                                                                      | 0.0235                                                                        |
| Nol10              | nucleolar protein 10                                                  | NM_001008421     | 0.328                                              | -0.111                                               | 0.0000                                           | 0.0000                                                                      | 0.2304                                                                        |
| Nol11              | nucleolar protein 11                                                  | AK054118         | 0.261                                              | -0.183                                               | 0.0001                                           | 0.0237                                                                      | 0.0018                                                                        |
| Nov                | nephroblastoma<br>overexpressed gene                                  | NM_010930        | 0.818                                              | -0.036                                               | 0.0000                                           | 0.0000                                                                      | 0.9047                                                                        |
| Nox4               | NADPH oxidase 4                                                       | AK085509         | 0.571                                              | -0.428                                               | 0.0000                                           | 0.0000                                                                      | 0.0001                                                                        |
| Npal2              | NIPA-like domain<br>containing 2                                      | AK038556         | 0.271                                              | -0.160                                               | 0.0035                                           | 0.0079                                                                      | 0.2553                                                                        |
| Npas1              | neuronal PAS<br>domain protein 1                                      | NM_008718        | 0.473                                              | -0.417                                               | 0.0000                                           | 0.0000                                                                      | 0.0001                                                                        |
| Npbwr1             | NA                                                                    | XM_984122        | 0.939                                              | -0.565                                               | 0.0012                                           | 0.0033                                                                      | 0.2137                                                                        |
| Npc2               | Niemann Pick type<br>C2                                               | AK151080         | 0.312                                              | -0.120                                               | 0.0128                                           | 0.0284                                                                      | 0.2753                                                                        |
| Npdc1              | neural proliferation,<br>differentiation and<br>control gene 1        | BC023887         | 0.355                                              | -0.102                                               | 0.0000                                           | 0.0001                                                                      | 0.2802                                                                        |
| Npm3               | nucleoplasmin 3                                                       | NM_008723        | 0.443                                              | -0.467                                               | 0.0228                                           | 0.1245                                                                      | 0.1242                                                                        |
| Npr1               | natriuretic peptide<br>receptor 1                                     | NM_145540        | 0.416                                              | -0.119                                               | 0.0000                                           | 0.0000                                                                      | 0.0618                                                                        |
| Npy                | neuropeptide Y                                                        | NM_023456        | 0.576                                              | -0.184                                               | 0.0009                                           | 0.0038                                                                      | 0.1458                                                                        |
| Nqo1               | NAD(P)H<br>dehydrogenase,<br>quinone 1                                | AK157369         | 0.708                                              | -0.204                                               | 0.0001                                           | 0.0001                                                                      | 0.3990                                                                        |
| Nr1h3              | nuclear receptor<br>subfamily 1, group<br>H, member 3                 | NM_013839        | 0.342                                              | -0.095                                               | 0.0311                                           | 0.0273                                                                      | 0.5431                                                                        |
| Nr2f6              | nuclear receptor<br>subfamily 2, group F,<br>member 6                 | AK144475         | 0.449                                              | -0.062                                               | 0.0013                                           | 0.0005                                                                      | 0.7259                                                                        |
| Nradd              | neurotrophin receptor<br>associated death<br>domain                   | NM_026012        | 0.545                                              | -0.423                                               | 0.0110                                           | 0.0953                                                                      | 0.0816                                                                        |
| Nrarp              | Notch-regulated<br>ankyrin repeat<br>protein                          | NM_025980        | 0.604                                              | -0.598                                               | 0.0066                                           | 0.0809                                                                      | 0.0594                                                                        |

**Table S1.** Continued.

| <b>Gene Symbol</b> | <b>Gene Name</b>                                                          | <b>Entrez ID</b> | <b>Fold Change<br/><i>MECP2</i>-Tg<br/>over WT</b> | <b>Fold Change<br/><i>Mecp2</i>-null<br/>over WT</b> | <b>FDR-<br/>adjusted<br/>p-value<br/>(Total)</b> | <b>FDR-<br/>adjusted<br/>p-value<br/>(<i>MECP2</i>-<br/>Tg over<br/>WT)</b> | <b>FDR-<br/>adjusted<br/>p-value<br/>(<i>Mecp2</i>-<br/>null over<br/>WT)</b> |
|--------------------|---------------------------------------------------------------------------|------------------|----------------------------------------------------|------------------------------------------------------|--------------------------------------------------|-----------------------------------------------------------------------------|-------------------------------------------------------------------------------|
| Nsd1               | nuclear receptor-<br>binding SET-domain<br>protein 1                      | AK179504         | 0.398                                              | -0.123                                               | 0.0001                                           | 0.0006                                                                      | 0.0833                                                                        |
| Nt5c               | 5',3'-nucleotidase,<br>cytosolic                                          | BC024368         | 0.327                                              | -0.279                                               | 0.0005                                           | 0.0763                                                                      | 0.0055                                                                        |
| Nt5c31             | NA                                                                        | NM_026561        | 0.266                                              | -0.138                                               | 0.0072                                           | 0.0239                                                                      | 0.1952                                                                        |
| Nt5dc2             | NA                                                                        | NM_027289        | 0.340                                              | -0.194                                               | 0.0004                                           | 0.0017                                                                      | 0.1338                                                                        |
| Ntf3               | neurotrophin 3                                                            | NM_008742        | 0.608                                              | -0.255                                               | 0.0089                                           | 0.0033                                                                      | 0.8102                                                                        |
| Nts                | neurotensin                                                               | NM_024435        | 0.990                                              | -0.677                                               | 0.0000                                           | 0.0003                                                                      | 0.0140                                                                        |
| Ntsr1              | neurotensin receptor1                                                     | NM_018766        | 0.371                                              | -0.319                                               | 0.0000                                           | 0.0004                                                                      | 0.0102                                                                        |
| Nudt10             | nudix (nucleoside<br>diphosphate linked<br>moiety X)-type motif<br>10     | NM_001031664     | 0.369                                              | -0.181                                               | 0.0009                                           | 0.0065                                                                      | 0.0954                                                                        |
| Nudt12             | nudix (nucleoside<br>diphosphate linked<br>moiety X)-type motif<br>12     | NM_026497        | 0.241                                              | -0.237                                               | 0.0267                                           | 0.1741                                                                      | 0.1031                                                                        |
| Nudt14             | nudix (nucleoside<br>diphosphate linked<br>moiety X)-type motif<br>14     | AK003991         | 0.218                                              | -0.262                                               | 0.0226                                           | 0.3939                                                                      | 0.0340                                                                        |
| Nudt22             | nudix (nucleoside<br>diphosphate linked<br>moiety X)-type motif<br>22     | NM_026675        | 0.370                                              | -0.105                                               | 0.0118                                           | 0.0116                                                                      | 0.4810                                                                        |
| Nudt3              | nudix (nucleotide<br>diphosphate linked<br>moiety X)-type motif<br>3      | XM_992328        | 0.482                                              | -0.047                                               | 0.0027                                           | 0.0011                                                                      | 0.7520                                                                        |
| Nudt5              | nudix (nucleoside<br>diphosphate linked<br>moiety X)-type motif<br>5      | AK018345         | 0.283                                              | -0.165                                               | 0.0012                                           | 0.0080                                                                      | 0.1006                                                                        |
| Nudt7              | nudix (nucleoside<br>diphosphate linked<br>moiety X)-type motif<br>7      | BC033046         | 0.252                                              | -0.307                                               | 0.0062                                           | 0.1167                                                                      | 0.0383                                                                        |
| Nufip1             | nuclear fragile X<br>mental retardation<br>protein interacting<br>protein | NM_013745        | 0.498                                              | -0.129                                               | 0.0001                                           | 0.0001                                                                      | 0.3286                                                                        |
| Nup155             | nucleoporin 155                                                           | NM_133227        | 0.229                                              | -0.198                                               | 0.0000                                           | 0.0000                                                                      | 0.0000                                                                        |
| Nxph3              | neurexophilin 3                                                           | NM_130858        | 0.253                                              | -0.390                                               | 0.0041                                           | 0.1425                                                                      | 0.0204                                                                        |

**Table S1.** Continued.

| <b>Gene Symbol</b> | <b>Gene Name</b>                                                           | <b>Entrez ID</b> | <b>Fold Change<br/><i>MECP2</i>-Tg<br/>over WT</b> | <b>Fold Change<br/><i>Mecp2</i>-null<br/>over WT</b> | <b>FDR-<br/>adjusted<br/>p-value<br/>(Total)</b> | <b>FDR-<br/>adjusted<br/>p-value<br/>(<i>MECP2</i>-<br/>Tg over<br/>WT)</b> | <b>FDR-<br/>adjusted<br/>p-value<br/>(<i>Mecp2</i>-<br/>null over<br/>WT)</b> |
|--------------------|----------------------------------------------------------------------------|------------------|----------------------------------------------------|------------------------------------------------------|--------------------------------------------------|-----------------------------------------------------------------------------|-------------------------------------------------------------------------------|
| Nxph4              | neurexophilin 4                                                            | NM_183297        | 0.790                                              | -1.120                                               | 0.0000                                           | 0.0053                                                                      | 0.0000                                                                        |
| Oat1l              | ornithine<br>aminotransferase-like<br>1                                    | NM_172478        | 0.242                                              | -0.260                                               | 0.0040                                           | 0.1571                                                                      | 0.0176                                                                        |
| Oaz2               | ornithine<br>decarboxylase<br>antizyme 2                                   | NM_010952        | 0.484                                              | -0.327                                               | 0.0086                                           | 0.0240                                                                      | 0.2267                                                                        |
| Odc1               | ornithine<br>decarboxylase,<br>structural 1                                | NM_013614        | 0.312                                              | -0.238                                               | 0.0202                                           | 0.1935                                                                      | 0.0693                                                                        |
| Odf2l              | outer dense fiber of<br>sperm tails 2-like                                 | AK048931         | 0.217                                              | -0.307                                               | 0.0005                                           | 0.0941                                                                      | 0.0042                                                                        |
| Odf4               | outer dense fiber of<br>sperm tails 4                                      | XM_976840        | 0.217                                              | -0.381                                               | 0.0283                                           | 0.4085                                                                      | 0.0406                                                                        |
| Ogfr               | opioid growth factor<br>receptor                                           | NM_031373        | 0.409                                              | -0.130                                               | 0.0084                                           | 0.0561                                                                      | 0.1074                                                                        |
| Olfm2              | olfactomedin 2                                                             | NM_173777        | 0.225                                              | -0.307                                               | 0.0114                                           | 0.2266                                                                      | 0.0331                                                                        |
| Olig1              | oligodendrocyte<br>transcription factor 1                                  | NM_016968        | 0.413                                              | -0.130                                               | 0.0214                                           | 0.0276                                                                      | 0.4167                                                                        |
| Oma1               | OMA1 homolog,<br>zinc metallopeptidase<br>( <i>S. cerevisiae</i> )         | AK136208         | 0.383                                              | -0.135                                               | 0.0001                                           | 0.0004                                                                      | 0.1617                                                                        |
| Oprk1              | opioid receptor,<br>kappa 1                                                | AK039151         | 0.884                                              | -0.903                                               | 0.0000                                           | 0.0000                                                                      | 0.0000                                                                        |
| Orc6l              | origin recognition<br>complex, subunit 6-<br>like ( <i>S. cerevisiae</i> ) | AK078405         | 0.612                                              | -0.037                                               | 0.0002                                           | 0.0000                                                                      | 0.8523                                                                        |
| Ormdl1             | ORM1-like 1 ( <i>S.</i><br><i>cerevisiae</i> )                             | NM_145517        | 0.630                                              | -0.559                                               | 0.0019                                           | 0.1152                                                                      | 0.0122                                                                        |
| Oxgr1              | NA                                                                         | NM_001001490     | 0.784                                              | -0.387                                               | 0.0001                                           | 0.0006                                                                      | 0.0949                                                                        |
| Oxt                | oxytocin                                                                   | NM_011025        | 0.383                                              | -0.436                                               | 0.0244                                           | 0.3719                                                                      | 0.0395                                                                        |
| P140               | NA                                                                         | AK129422         | 0.323                                              | -0.095                                               | 0.0000                                           | 0.0000                                                                      | 0.0722                                                                        |
| P2rx3              | purinergic receptor<br>P2X, ligand-gated<br>ion channel, 3                 | AK140283         | 0.261                                              | -0.222                                               | 0.0154                                           | 0.1203                                                                      | 0.0887                                                                        |
| P2ry1              | purinergic receptor<br>P2Y, G-protein<br>coupled 1                         | AK033660         | 0.354                                              | -0.416                                               | 0.0001                                           | 0.0118                                                                      | 0.0087                                                                        |
| Pabpc1             | poly A binding<br>protein, cytoplasmic1                                    | AK005009         | 0.267                                              | -0.133                                               | 0.0037                                           | 0.0147                                                                      | 0.1635                                                                        |



**Table S1.** Continued.

| <b>Gene Symbol</b> | <b>Gene Name</b>                                                                                             | <b>Entrez ID</b> | <b>Fold Change<br/><i>MECP2</i>-Tg<br/>over WT</b> | <b>Fold Change<br/><i>Mecp2</i>-null<br/>over WT</b> | <b>FDR-<br/>adjusted<br/>p-value<br/>(Total)</b> | <b>FDR-<br/>adjusted<br/>p-value<br/>(<i>MECP2</i>-<br/>Tg over<br/>WT)</b> | <b>FDR-<br/>adjusted<br/>p-value<br/>(<i>Mecp2</i>-<br/>null over<br/>WT)</b> |
|--------------------|--------------------------------------------------------------------------------------------------------------|------------------|----------------------------------------------------|------------------------------------------------------|--------------------------------------------------|-----------------------------------------------------------------------------|-------------------------------------------------------------------------------|
| Pafah1b3           | platelet-activating factor acetylhydrolase, isoform 1b, alpha1 subunit                                       | NM_008776        | 0.555                                              | -0.471                                               | 0.0000                                           | 0.0017                                                                      | 0.0001                                                                        |
| Pak1ip1            | PAK1 interacting protein 1                                                                                   | AK017959         | 0.351                                              | -0.137                                               | 0.0000                                           | 0.0000                                                                      | 0.1443                                                                        |
| Panx1              | pannexin 1                                                                                                   | AK089764         | 0.371                                              | -0.307                                               | 0.0000                                           | 0.0000                                                                      | 0.0026                                                                        |
| Panx2              | pannexin 2                                                                                                   | NM_001002005     | 0.257                                              | -0.269                                               | 0.0200                                           | 0.1214                                                                      | 0.1131                                                                        |
| Papd4              | PAP associated domain containing 4                                                                           | XR_004961        | 0.123                                              | -0.532                                               | 0.0463                                           | 0.8145                                                                      | 0.0243                                                                        |
| Papd5              | NA                                                                                                           | XM_134422        | 0.370                                              | -0.454                                               | 0.0004                                           | 0.0414                                                                      | 0.0070                                                                        |
| Pappa              | pregnancy-associated plasma protein A                                                                        | NM_021362        | 0.215                                              | -0.398                                               | 0.0000                                           | 0.0129                                                                      | 0.0000                                                                        |
| Pappa2             | pappalysin 2                                                                                                 | XM_355248        | 0.425                                              | -0.137                                               | 0.0000                                           | 0.0000                                                                      | 0.2516                                                                        |
| Paqr4              | progesterin and adipoQ receptor family member IV                                                             | NM_023824        | 0.506                                              | -0.134                                               | 0.0000                                           | 0.0000                                                                      | 0.1422                                                                        |
| Paqr6              | progesterin and adipoQ receptor family member VI                                                             | XM_987704        | 0.528                                              | -0.258                                               | 0.0000                                           | 0.0000                                                                      | 0.0128                                                                        |
| Parg               | poly (ADP-ribose) glycohydrolase                                                                             | AK160742         | 0.223                                              | -0.185                                               | 0.0000                                           | 0.0011                                                                      | 0.0111                                                                        |
| Pbx2               | pre B-cell leukemia transcription factor 2                                                                   | AK141763         | 0.488                                              | -0.173                                               | 0.0000                                           | 0.0000                                                                      | 0.0287                                                                        |
| Pbxip1             | pre-B-cell leukemia transcription factor interacting protein 1                                               | NM_146131        | 0.336                                              | -0.130                                               | 0.0000                                           | 0.0000                                                                      | 0.1058                                                                        |
| Pcbd1              | pterin 4 alpha carbinolamine dehydratase/dimerization cofactor of hepatocyte nuclear factor 1 alpha (TCF1) 1 | M83741           | 0.589                                              | -0.195                                               | 0.0236                                           | 0.0619                                                                      | 0.2414                                                                        |
| Pcbp1              | poly(rC) binding protein 1                                                                                   | NM_011865        | 0.480                                              | -0.067                                               | 0.0474                                           | 0.0180                                                                      | 0.8685                                                                        |
| Pcbp4              | poly(rC) binding protein 4                                                                                   | NM_021567        | 0.319                                              | -0.150                                               | 0.0000                                           | 0.0000                                                                      | 0.0007                                                                        |
| Pcdh11x            | protocadherin 11 X-linked                                                                                    | AY861426         | 0.277                                              | -0.639                                               | 0.0000                                           | 0.0328                                                                      | 0.0000                                                                        |
| Pcdh18             | protocadherin 18                                                                                             | AK014140         | 0.438                                              | -0.487                                               | 0.0000                                           | 0.0005                                                                      | 0.0002                                                                        |
| Pcdh19             | protocadherin 19                                                                                             | XM_205287        | 0.178                                              | -0.323                                               | 0.0103                                           | 0.6249                                                                      | 0.0076                                                                        |

**Table S1.** Continued.

| <b>Gene Symbol</b> | <b>Gene Name</b>                                                   | <b>Entrez ID</b> | <b>Fold Change<br/><i>MECP2</i>-Tg<br/>over WT</b> | <b>Fold Change<br/><i>Mecp2</i>-null<br/>over WT</b> | <b>FDR-<br/>adjusted<br/>p-value<br/>(Total)</b> | <b>FDR-<br/>adjusted<br/>p-value<br/>(<i>MECP2</i>-<br/>Tg over<br/>WT)</b> | <b>FDR-<br/>adjusted<br/>p-value<br/>(<i>Mecp2</i>-<br/>null over<br/>WT)</b> |
|--------------------|--------------------------------------------------------------------|------------------|----------------------------------------------------|------------------------------------------------------|--------------------------------------------------|-----------------------------------------------------------------------------|-------------------------------------------------------------------------------|
| Pcdh21             | protocadherin 21                                                   | NM_130878        | 0.313                                              | -0.383                                               | 0.0000                                           | 0.0016                                                                      | 0.0004                                                                        |
| Pcdh8              | protocadherin 8                                                    | AK006960         | 0.453                                              | -0.086                                               | 0.0268                                           | 0.0170                                                                      | 0.6515                                                                        |
| Pcdhb11            | protocadherin beta 11                                              | NM_053136        | 0.451                                              | -0.206                                               | 0.0427                                           | 0.0422                                                                      | 0.5114                                                                        |
| Pcdhb16            | protocadherin beta 16                                              | NM_053141        | 0.466                                              | -0.290                                               | 0.0274                                           | 0.0525                                                                      | 0.3171                                                                        |
| Pcdhb19            | protocadherin beta 19                                              | NM_053144        | 0.199                                              | -0.327                                               | 0.0056                                           | 0.5066                                                                      | 0.0056                                                                        |
| Pcdhb3             | protocadherin beta 3                                               | NM_053128        | 0.575                                              | -0.154                                               | 0.0138                                           | 0.0091                                                                      | 0.6116                                                                        |
| Pcdhb7             | protocadherin beta 7                                               | NM_053132        | 0.410                                              | -0.187                                               | 0.0322                                           | 0.0363                                                                      | 0.4616                                                                        |
| Pcdhb9             | protocadherin beta 9                                               | NM_053134        | 0.749                                              | -0.506                                               | 0.0034                                           | 0.0212                                                                      | 0.1134                                                                        |
| Pcgf1              | polycomb group ring<br>finger 1                                    | AK008048         | 0.266                                              | -0.168                                               | 0.0018                                           | 0.0361                                                                      | 0.0388                                                                        |
| Pcgf2              | polycomb group ring<br>finger 2                                    | NM_009545        | 0.432                                              | -0.292                                               | 0.0000                                           | 0.0003                                                                      | 0.0000                                                                        |
| Pcgf6              | polycomb group ring<br>finger 6                                    | AK132448         | 0.362                                              | -0.246                                               | 0.0000                                           | 0.0017                                                                      | 0.0000                                                                        |
| Pck2               | phosphoenolpyruvate<br>carboxykinase 2<br>(mitochondrial)          | NM_028994        | 0.293                                              | -0.167                                               | 0.0000                                           | 0.0010                                                                      | 0.0115                                                                        |
| Pcmdt2             | NA                                                                 | NM_153594        | 0.380                                              | -0.291                                               | 0.0000                                           | 0.0000                                                                      | 0.0000                                                                        |
| Pcna               | proliferating cell<br>nuclear antigen                              | NM_011045        | 0.448                                              | -0.265                                               | 0.0024                                           | 0.0705                                                                      | 0.0257                                                                        |
| Pcp411             | Purkinje cell protein<br>4-like 1                                  | XM_917594        | 0.245                                              | -0.324                                               | 0.0096                                           | 0.2491                                                                      | 0.0249                                                                        |
| Pcsk1              | proprotein convertase<br>subtilisin/kexin type1                    | NM_013628        | 0.482                                              | -0.601                                               | 0.0000                                           | 0.0000                                                                      | 0.0000                                                                        |
| Pctk3              | PCTAIRE-motif<br>protein kinase 3                                  | AK004998         | 0.354                                              | -0.288                                               | 0.0000                                           | 0.0000                                                                      | 0.0000                                                                        |
| Pcyox11            | NA                                                                 | NM_172832        | 0.326                                              | -0.092                                               | 0.0004                                           | 0.0002                                                                      | 0.5367                                                                        |
| Pdcl3              | phosducin-like 3                                                   | NM_026850        | 0.245                                              | -0.165                                               | 0.0280                                           | 0.5247                                                                      | 0.0286                                                                        |
| Pde1b              | phosphodiesterase<br>1B, Ca <sup>2+</sup> -calmodulin<br>dependent | NM_008800        | 0.385                                              | -0.209                                               | 0.0000                                           | 0.0000                                                                      | 0.0000                                                                        |
| Pde6d              | phosphodiesterase<br>6D, cGMP-specific,<br>rod, delta              | XM_974388        | 0.350                                              | -0.162                                               | 0.0006                                           | 0.0017                                                                      | 0.2005                                                                        |
| Pdgfa              | platelet derived<br>growth factor, alpha                           | AK017169         | 0.392                                              | -0.127                                               | 0.0000                                           | 0.0000                                                                      | 0.0977                                                                        |
| Pdgfb              | platelet derived<br>growth factor, B<br>polypeptide                | NM_011057        | 0.470                                              | -0.161                                               | 0.0000                                           | 0.0000                                                                      | 0.0930                                                                        |
| Pdgfc              | platelet-derived<br>growth factor, C<br>polypeptide                | BC006027         | 0.391                                              | -0.084                                               | 0.0042                                           | 0.0026                                                                      | 0.5999                                                                        |

**Table S1.** Continued.

| <b>Gene Symbol</b> | <b>Gene Name</b>                                           | <b>Entrez ID</b> | <b>Fold Change<br/><i>MECP2</i>-Tg<br/>over WT</b> | <b>Fold Change<br/><i>Mecp2</i>-null<br/>over WT</b> | <b>FDR-<br/>adjusted<br/>p-value<br/>(Total)</b> | <b>FDR-<br/>adjusted<br/>p-value<br/>(<i>MECP2</i>-<br/>Tg over<br/>WT)</b> | <b>FDR-<br/>adjusted<br/>p-value<br/>(<i>Mecp2</i>-<br/>null over<br/>WT)</b> |
|--------------------|------------------------------------------------------------|------------------|----------------------------------------------------|------------------------------------------------------|--------------------------------------------------|-----------------------------------------------------------------------------|-------------------------------------------------------------------------------|
| Pdgfra             | platelet derived growth factor receptor, alpha polypeptide | AK145097         | 0.269                                              | -0.368                                               | 0.0000                                           | 0.0001                                                                      | 0.0000                                                                        |
| Pdia4              | protein disulfide isomerase associated 4                   | NM_009787        | 0.355                                              | -0.140                                               | 0.0000                                           | 0.0000                                                                      | 0.0392                                                                        |
| Pdia6              | protein disulfide isomerase associated 6                   | XM_907880        | 0.324                                              | -0.109                                               | 0.0000                                           | 0.0001                                                                      | 0.0194                                                                        |
| Pdzd4              | NA                                                         | AK084004         | 0.453                                              | -0.185                                               | 0.0000                                           | 0.0000                                                                      | 0.0064                                                                        |
| Pdzd7              | NA                                                         | NM_177605        | 0.401                                              | -0.117                                               | 0.0149                                           | 0.0132                                                                      | 0.5192                                                                        |
| Pemt               | phosphatidylethanolamine N-methyltransferase               | NM_008819        | 0.555                                              | -0.140                                               | 0.0000                                           | 0.0000                                                                      | 0.4894                                                                        |
| Penk1              | preproenkephalin 1                                         | NM_001002927     | 0.404                                              | -0.577                                               | 0.0002                                           | 0.0314                                                                      | 0.0065                                                                        |
| Pex13              | peroxisomal biogenesis factor 13                           | NM_023651        | 0.345                                              | -0.102                                               | 0.0018                                           | 0.0029                                                                      | 0.3190                                                                        |
| Pex16              | peroxisome biogenesis factor 16                            | NM_145122        | 0.295                                              | -0.129                                               | 0.0049                                           | 0.0143                                                                      | 0.2132                                                                        |
| Pex5               | peroxisome biogenesis factor 5                             | NM_008995        | 0.262                                              | -0.139                                               | 0.0000                                           | 0.0001                                                                      | 0.0115                                                                        |
| Pex6               | peroxisomal biogenesis factor 6                            | NM_145488        | 0.539                                              | -0.092                                               | 0.0000                                           | 0.0000                                                                      | 0.0440                                                                        |
| Pfkfb1             | 6-phosphofructo-2-kinase/fructose-2,6-biphosphatase 1      | NM_008824        | 0.183                                              | -0.295                                               | 0.0038                                           | 0.2617                                                                      | 0.0090                                                                        |
| Pgam2              | phosphoglycerate mutase 2                                  | NM_018870        | 0.320                                              | -0.331                                               | 0.0137                                           | 0.0937                                                                      | 0.1028                                                                        |
| Pgam5              | NA                                                         | NM_028273        | 0.457                                              | -0.060                                               | 0.0014                                           | 0.0008                                                                      | 0.6116                                                                        |
| Pgcp               | NA                                                         | NM_018755        | 0.258                                              | -0.169                                               | 0.0001                                           | 0.0005                                                                      | 0.1118                                                                        |
| Pggt1b             | protein geranylgeranyltransferase type I, beta subunit     | BC048404         | 0.294                                              | -0.112                                               | 0.0324                                           | 0.0391                                                                      | 0.4418                                                                        |
| Pgpep1             | pyroglutamyl-peptidase I                                   | AK003373         | 0.542                                              | -0.204                                               | 0.0001                                           | 0.0005                                                                      | 0.1334                                                                        |
| Pgr                | progesterone receptor                                      | AK036862         | 0.138                                              | -0.307                                               | 0.0000                                           | 0.1821                                                                      | 0.0001                                                                        |
| Pgr15l             | NA                                                         | NM_001033361     | 0.815                                              | -0.638                                               | 0.0000                                           | 0.0000                                                                      | 0.0260                                                                        |
| Pgrmcl             | progesterone receptor membrane component 1                 | NM_016783        | 0.411                                              | -0.143                                               | 0.0045                                           | 0.0155                                                                      | 0.1867                                                                        |

**Table S1.** Continued.

| <b>Gene Symbol</b> | <b>Gene Name</b>                                                        | <b>Entrez ID</b> | <b>Fold Change<br/><i>MECP2</i>-Tg<br/>over WT</b> | <b>Fold Change<br/><i>Mecp2</i>-null<br/>over WT</b> | <b>FDR-<br/>adjusted<br/>p-value<br/>(Total)</b> | <b>FDR-<br/>adjusted<br/>p-value<br/>(<i>MECP2</i>-<br/>Tg over<br/>WT)</b> | <b>FDR-<br/>adjusted<br/>p-value<br/>(<i>Mecp2</i>-<br/>null over<br/>WT)</b> |
|--------------------|-------------------------------------------------------------------------|------------------|----------------------------------------------------|------------------------------------------------------|--------------------------------------------------|-----------------------------------------------------------------------------|-------------------------------------------------------------------------------|
| Phca               | phytoceramidase,<br>alkaline                                            | NM_025408        | 0.340                                              | -0.298                                               | 0.0011                                           | 0.0422                                                                      | 0.0214                                                                        |
| Phf16              | PHD finger protein<br>16                                                | AK077755         | 0.259                                              | -0.270                                               | 0.0017                                           | 0.0551                                                                      | 0.0235                                                                        |
| Phf23              | PHD finger protein<br>23                                                | NM_030064        | 0.545                                              | -0.202                                               | 0.0000                                           | 0.0000                                                                      | 0.0297                                                                        |
| Phka1              | phosphorylase kinase<br>alpha 1                                         | X73876           | 0.328                                              | -0.146                                               | 0.0000                                           | 0.0000                                                                      | 0.0000                                                                        |
| Pigs               | phosphatidylinositol<br>glycan, class S                                 | AK158128         | 0.322                                              | -0.162                                               | 0.0000                                           | 0.0003                                                                      | 0.0342                                                                        |
| Pigt               | phosphatidylinositol<br>glycan, class T                                 | NM_133779        | 0.341                                              | -0.062                                               | 0.0000                                           | 0.0000                                                                      | 0.4019                                                                        |
| Pik4cb             | phosphatidylinositol<br>4-kinase, catalytic,<br>beta polypeptide        | BC059895         | 0.262                                              | -0.208                                               | 0.0000                                           | 0.0014                                                                      | 0.0000                                                                        |
| Pim2               | proviral integration<br>site 2                                          | NM_145737        | 0.316                                              | -0.225                                               | 0.0000                                           | 0.0026                                                                      | 0.0014                                                                        |
| Pip5k1l            | phosphatidylinositol-<br>4-phosphate 5-<br>kinase-like 1                | AK133244         | 0.423                                              | -0.506                                               | 0.0000                                           | 0.0002                                                                      | 0.0000                                                                        |
| Pitpnm1            | phosphatidylinositol<br>membrane-associated<br>1                        | AK155377         | 0.373                                              | -0.087                                               | 0.0000                                           | 0.0000                                                                      | 0.0166                                                                        |
| Pkib               | protein kinase<br>inhibitor beta, cAMP<br>dependent, testis<br>specific | NM_001039051     | 0.253                                              | -0.299                                               | 0.0439                                           | 0.3646                                                                      | 0.0733                                                                        |
| Pla2g3             | NA                                                                      | BC079556         | 0.273                                              | -0.179                                               | 0.0070                                           | 0.0187                                                                      | 0.2330                                                                        |
| Pla2g4e            | NA                                                                      | AK049063         | 0.137                                              | -0.531                                               | 0.0005                                           | 0.0267                                                                      | 0.0160                                                                        |
| Plag1              | pleiomorphic<br>adenoma gene 1                                          | NM_019969        | 0.173                                              | -0.328                                               | 0.0500                                           | 0.5376                                                                      | 0.0505                                                                        |
| Plat               | plasminogen<br>activator, tissue                                        | NM_008872        | 0.289                                              | -0.142                                               | 0.0000                                           | 0.0023                                                                      | 0.0008                                                                        |
| Plcd4              | phospholipase C,<br>delta 4                                             | AK039149         | 0.240                                              | -0.238                                               | 0.0000                                           | 0.0001                                                                      | 0.0000                                                                        |
| Plcx2              | NA                                                                      | XM_001000738     | 0.270                                              | -0.338                                               | 0.0195                                           | 0.1163                                                                      | 0.1151                                                                        |
| Plcz1              | phospholipase C, zeta<br>1                                              | AK005949         | 0.516                                              | -0.266                                               | 0.0001                                           | 0.0004                                                                      | 0.1789                                                                        |
| Pld2               | phospholipase D2                                                        | NM_176893        | 0.601                                              | -0.345                                               | 0.0000                                           | 0.0000                                                                      | 0.0000                                                                        |
| Pld4               | phospholipase D<br>family, member 4                                     | BC058565         | 0.354                                              | -0.234                                               | 0.0007                                           | 0.0121                                                                      | 0.0438                                                                        |
| Pldn               | pallidin                                                                | NM_019788        | 0.318                                              | -0.199                                               | 0.0074                                           | 0.0548                                                                      | 0.0978                                                                        |
| Plek               | pleckstrin                                                              | NM_019549        | 0.217                                              | -0.201                                               | 0.0051                                           | 0.1140                                                                      | 0.0324                                                                        |

**Table S1.** Continued.

| <b>Gene Symbol</b> | <b>Gene Name</b>                                            | <b>Entrez ID</b> | <b>Fold Change<br/><i>MECP2</i>-Tg<br/>over WT</b> | <b>Fold Change<br/><i>Mecp2</i>-null<br/>over WT</b> | <b>FDR-<br/>adjusted<br/>p-value<br/>(Total)</b> | <b>FDR-<br/>adjusted<br/>p-value<br/>(<i>MECP2</i>-<br/>Tg over<br/>WT)</b> | <b>FDR-<br/>adjusted<br/>p-value<br/>(<i>Mecp2</i>-<br/>null over<br/>WT)</b> |
|--------------------|-------------------------------------------------------------|------------------|----------------------------------------------------|------------------------------------------------------|--------------------------------------------------|-----------------------------------------------------------------------------|-------------------------------------------------------------------------------|
| Plekhh3            | NA                                                          | NM_146030        | 0.366                                              | -0.060                                               | 0.0000                                           | 0.0000                                                                      | 0.6792                                                                        |
| Plk3               | polo-like kinase 3<br>(Drosophila)                          | NM_013807        | 0.161                                              | -0.315                                               | 0.0000                                           | 0.0893                                                                      | 0.0000                                                                        |
| Plk4               | polo-like kinase 4<br>(Drosophila)                          | AK045082         | 0.588                                              | -0.441                                               | 0.0000                                           | 0.0000                                                                      | 0.0000                                                                        |
| Plod1              | procollagen-lysine, 2-oxoglutarate 5-<br>dioxygenase 1      | NM_011122        | 0.500                                              | -0.222                                               | 0.0000                                           | 0.0000                                                                      | 0.0001                                                                        |
| Plod3              | procollagen-lysine, 2-oxoglutarate 5-<br>dioxygenase 3      | NM_011962        | 0.399                                              | -0.179                                               | 0.0000                                           | 0.0000                                                                      | 0.0005                                                                        |
| Plxna2             | plexin A2                                                   | NM_008882        | 0.390                                              | -0.137                                               | 0.0000                                           | 0.0000                                                                      | 0.0000                                                                        |
| Plxna3             | plexin A3                                                   | NM_008883        | 0.605                                              | -0.491                                               | 0.0000                                           | 0.0000                                                                      | 0.0000                                                                        |
| Plxnb2             | plexin B2                                                   | XM_001003816     | 0.356                                              | -0.149                                               | 0.0053                                           | 0.0405                                                                      | 0.0939                                                                        |
| Plxnb3             | plexin B3                                                   | AK048728         | 0.452                                              | -0.269                                               | 0.0000                                           | 0.0000                                                                      | 0.0000                                                                        |
| Plxnc1             | plexin C1                                                   | NM_018797        | 0.190                                              | -0.287                                               | 0.0000                                           | 0.0005                                                                      | 0.0000                                                                        |
| Pmpcb              | peptidase<br>(mitochondrial<br>processing) beta             | NM_028431        | 0.326                                              | -0.137                                               | 0.0027                                           | 0.0145                                                                      | 0.1284                                                                        |
| Pnma3              | paraneoplastic<br>antigen MA3                               | NM_153169        | 0.632                                              | -0.225                                               | 0.0140                                           | 0.0211                                                                      | 0.3669                                                                        |
| Pno1               | NA                                                          | NM_025443        | 0.423                                              | -0.115                                               | 0.0404                                           | 0.0493                                                                      | 0.4437                                                                        |
| Pnp                | purine-nucleoside<br>phosphorylase                          | XM_972632        | 0.276                                              | -0.211                                               | 0.0050                                           | 0.0311                                                                      | 0.1139                                                                        |
| Pnpla3             | NA                                                          | NM_054088        | 0.200                                              | -0.207                                               | 0.0054                                           | 0.1128                                                                      | 0.0344                                                                        |
| Pnpla6             | NA                                                          | AK089095         | 0.259                                              | -0.193                                               | 0.0000                                           | 0.0000                                                                      | 0.0000                                                                        |
| Pola2              | polymerase (DNA<br>directed), alpha 2                       | NM_008893        | 0.288                                              | -0.175                                               | 0.0008                                           | 0.0087                                                                      | 0.0635                                                                        |
| Pold4              | polymerase (DNA-<br>directed), delta 4                      | NM_027196        | 0.430                                              | -0.350                                               | 0.0004                                           | 0.0117                                                                      | 0.0291                                                                        |
| Pole4              | polymerase (DNA-<br>directed), epsilon 4<br>(p12 subunit)   | AK145365         | 0.366                                              | -0.195                                               | 0.0204                                           | 0.0959                                                                      | 0.1435                                                                        |
| Polg2              | polymerase (DNA<br>directed), gamma 2,<br>accessory subunit | AF006072         | 0.185                                              | -0.216                                               | 0.0389                                           | 0.2761                                                                      | 0.0896                                                                        |
| Polh               | polymerase (DNA<br>directed), eta (RAD<br>30 related)       | NM_030715        | 0.375                                              | -0.106                                               | 0.0043                                           | 0.0040                                                                      | 0.4727                                                                        |
| Polm               | polymerase (DNA<br>directed), mu                            | AK137747         | 0.349                                              | -0.315                                               | 0.0000                                           | 0.0002                                                                      | 0.0017                                                                        |

**Table S1.** Continued.

| <b>Gene Symbol</b> | <b>Gene Name</b>                                                                                  | <b>Entrez ID</b> | <b>Fold Change<br/><i>MECP2</i>-Tg<br/>over WT</b> | <b>Fold Change<br/><i>Mecp2</i>-null<br/>over WT</b> | <b>FDR-<br/>adjusted<br/>p-value<br/>(Total)</b> | <b>FDR-<br/>adjusted<br/>p-value<br/>(<i>MECP2</i>-<br/>Tg over<br/>WT)</b> | <b>FDR-<br/>adjusted<br/>p-value<br/>(<i>Mecp2</i>-<br/>null over<br/>WT)</b> |
|--------------------|---------------------------------------------------------------------------------------------------|------------------|----------------------------------------------------|------------------------------------------------------|--------------------------------------------------|-----------------------------------------------------------------------------|-------------------------------------------------------------------------------|
| Polr2f             | polymerase (RNA) II<br>(DNA directed)<br>polypeptide F                                            | NM_027231        | 0.363                                              | -0.177                                               | 0.0100                                           | 0.1299                                                                      | 0.0543                                                                        |
| Polr2g             | polymerase (RNA) II<br>(DNA directed)<br>polypeptide G                                            | BC055278         | 0.474                                              | -0.224                                               | 0.0003                                           | 0.0319                                                                      | 0.0084                                                                        |
| Polr2h             | polymerase (RNA) II<br>(DNA directed)<br>polypeptide H                                            | NM_145632        | 0.697                                              | -0.018                                               | 0.0354                                           | 0.0098                                                                      | 0.9719                                                                        |
| Polr3f             | polymerase (RNA)<br>III (DNA directed)<br>polypeptide F                                           | AK013084         | 0.276                                              | -0.184                                               | 0.0003                                           | 0.0012                                                                      | 0.1441                                                                        |
| Polr3h             | polymerase (RNA)<br>III (DNA directed)<br>polypeptide H                                           | NM_030229        | 0.468                                              | -0.024                                               | 0.0021                                           | 0.0005                                                                      | 0.9226                                                                        |
| Pomp               | NA                                                                                                | AK044283         | 0.638                                              | -0.065                                               | 0.0003                                           | 0.0002                                                                      | 0.5878                                                                        |
| Pomt1              | protein-O-<br>mannosyltransferase1                                                                | NM_172661        | 0.324                                              | -0.154                                               | 0.0000                                           | 0.0000                                                                      | 0.0036                                                                        |
| Pomt2              | protein-O-<br>mannosyltransferase2                                                                | AK085703         | 0.348                                              | -0.221                                               | 0.0000                                           | 0.0000                                                                      | 0.0000                                                                        |
| Pop4               | processing of<br>precursor 4,<br>ribonuclease P/MRP<br>family, ( <i>S.</i><br><i>cerevisiae</i> ) | NM_025390        | 0.441                                              | -0.131                                               | 0.0063                                           | 0.0079                                                                      | 0.3985                                                                        |
| Postn              | periostin, osteoblast<br>specific factor                                                          | NM_015784        | 0.375                                              | -0.555                                               | 0.0000                                           | 0.0009                                                                      | 0.0000                                                                        |
| Pot1a              | NA                                                                                                | NM_133931        | 0.376                                              | -0.205                                               | 0.0000                                           | 0.0000                                                                      | 0.0005                                                                        |
| Pot1b              | NA                                                                                                | AK013364         | 0.348                                              | -0.142                                               | 0.0002                                           | 0.0003                                                                      | 0.3548                                                                        |
| Pp11r              | placental protein 11<br>related                                                                   | AK169457         | 0.317                                              | -0.191                                               | 0.0071                                           | 0.0156                                                                      | 0.2711                                                                        |
| Ppa1               | NA                                                                                                | AK033434         | 0.326                                              | -0.127                                               | 0.0000                                           | 0.0000                                                                      | 0.0668                                                                        |
| Ppap2c             | phosphatidic acid<br>phosphatase type 2c                                                          | NM_015817        | 0.556                                              | -0.406                                               | 0.0000                                           | 0.0000                                                                      | 0.0023                                                                        |
| Ppcs               | phosphopantothenoyl<br>cysteine synthetase                                                        | NM_026494        | 0.556                                              | -0.371                                               | 0.0011                                           | 0.0357                                                                      | 0.0251                                                                        |
| Ppef1              | NA                                                                                                | XM_987222        | 0.557                                              | -0.385                                               | 0.0000                                           | 0.0001                                                                      | 0.0197                                                                        |
| Ppic               | peptidylprolyl<br>isomerase C                                                                     | NM_008908        | 0.429                                              | -0.062                                               | 0.0412                                           | 0.0176                                                                      | 0.8148                                                                        |
| Ppil3              | peptidylprolyl<br>isomerase<br>(cyclophilin)-like 3                                               | NM_027351        | 0.393                                              | -0.211                                               | 0.0010                                           | 0.0369                                                                      | 0.0208                                                                        |

**Table S1.** Continued.

| <b>Gene Symbol</b> | <b>Gene Name</b>                                                          | <b>Entrez ID</b> | <b>Fold Change<br/><i>MECP2</i>-Tg<br/>over WT</b> | <b>Fold Change<br/><i>Mecp2</i>-null<br/>over WT</b> | <b>FDR-<br/>adjusted<br/>p-value<br/>(Total)</b> | <b>FDR-<br/>adjusted<br/>p-value<br/>(<i>MECP2</i>-<br/>Tg over<br/>WT)</b> | <b>FDR-<br/>adjusted<br/>p-value<br/>(<i>Mecp2</i>-<br/>null over<br/>WT)</b> |
|--------------------|---------------------------------------------------------------------------|------------------|----------------------------------------------------|------------------------------------------------------|--------------------------------------------------|-----------------------------------------------------------------------------|-------------------------------------------------------------------------------|
| Ppm1g              | protein phosphatase 1G (formerly 2C), magnesium-dependent, gamma isoform  | NM_008014        | 0.385                                              | -0.052                                               | 0.0117                                           | 0.0170                                                                      | 0.3714                                                                        |
| Ppp1ca             | protein phosphatase 1, catalytic subunit, alpha isoform                   | AK158681         | 0.282                                              | -0.144                                               | 0.0002                                           | 0.0181                                                                      | 0.0076                                                                        |
| Ppp1r11            | protein phosphatase 1, regulatory (inhibitor) subunit 11                  | NM_029632        | 0.269                                              | -0.266                                               | 0.0212                                           | 0.0633                                                                      | 0.2173                                                                        |
| Ppp1r16a           | protein phosphatase 1, regulatory (inhibitor) subunit 16A                 | BC044775         | 0.318                                              | -0.082                                               | 0.0047                                           | 0.0045                                                                      | 0.4684                                                                        |
| Ppp1r1a            | protein phosphatase 1, regulatory (inhibitor) subunit1A                   | NM_021391        | 0.662                                              | -0.286                                               | 0.0000                                           | 0.0000                                                                      | 0.0336                                                                        |
| Ppp1r3a            | protein phosphatase 1, regulatory (inhibitor) subunit3A                   | NM_080464        | 0.575                                              | -0.279                                               | 0.0054                                           | 0.0045                                                                      | 0.5150                                                                        |
| Ppp4c              | protein phosphatase 4, catalytic subunit                                  | NM_019674        | 0.286                                              | -0.154                                               | 0.0052                                           | 0.0774                                                                      | 0.0494                                                                        |
| Pprc1              | peroxisome proliferative activated receptor, gamma, coactivator-related 1 | XM_917944        | 0.379                                              | -0.176                                               | 0.0000                                           | 0.0005                                                                      | 0.0289                                                                        |
| Prcp               | prolylcarboxypeptidase (angiotensinase C)                                 | BC089575         | 0.229                                              | -0.336                                               | 0.0000                                           | 0.0120                                                                      | 0.0002                                                                        |
| Prdx1              | peroxiredoxin 1                                                           | NM_011034        | 0.189                                              | -0.437                                               | 0.0067                                           | 0.8190                                                                      | 0.0030                                                                        |
| Prdx4              | peroxiredoxin 4                                                           | NM_016764        | 0.503                                              | -0.221                                               | 0.0002                                           | 0.0011                                                                      | 0.1045                                                                        |
| Prim1              | DNA primase, p49 subunit                                                  | AK160831         | 0.443                                              | -0.319                                               | 0.0000                                           | 0.0000                                                                      | 0.0060                                                                        |
| Prkesh             | protein kinase C substrate 80K-H                                          | NM_008925        | 0.280                                              | -0.144                                               | 0.0000                                           | 0.0000                                                                      | 0.0317                                                                        |
| Prkd2              | protein kinase D2                                                         | BC096444         | 0.334                                              | -0.134                                               | 0.0096                                           | 0.0119                                                                      | 0.4080                                                                        |
| Prkdc              | protein kinase, DNA activated, catalytic polypeptide                      | NM_011159        | 0.215                                              | -0.226                                               | 0.0000                                           | 0.0000                                                                      | 0.0000                                                                        |
| Prkrip1            | Prkr interacting protein 1 (IL11 inducible)                               | BC027503         | 0.399                                              | -0.255                                               | 0.0185                                           | 0.0594                                                                      | 0.2027                                                                        |
| Prlhr              | NA                                                                        | NM_201615        | 0.775                                              | -0.311                                               | 0.0492                                           | 0.0339                                                                      | 0.6439                                                                        |

**Table S1.** Continued.

| <b>Gene Symbol</b> | <b>Gene Name</b>                                                                       | <b>Entrez ID</b> | <b>Fold Change<br/><i>MECP2</i>-Tg<br/>over WT</b> | <b>Fold Change<br/><i>Mecp2</i>-null<br/>over WT</b> | <b>FDR-<br/>adjusted<br/>p-value<br/>(Total)</b> | <b>FDR-<br/>adjusted<br/>p-value<br/>(<i>MECP2</i>-<br/>Tg over<br/>WT)</b> | <b>FDR-<br/>adjusted<br/>p-value<br/>(<i>Mecp2</i>-<br/>null over<br/>WT)</b> |
|--------------------|----------------------------------------------------------------------------------------|------------------|----------------------------------------------------|------------------------------------------------------|--------------------------------------------------|-----------------------------------------------------------------------------|-------------------------------------------------------------------------------|
| Prmt1              | NA                                                                                     | AK146927         | 0.409                                              | -0.169                                               | 0.0000                                           | 0.0000                                                                      | 0.0223                                                                        |
| Prmt2              | NA                                                                                     | NM_133182        | 0.310                                              | -0.287                                               | 0.0000                                           | 0.1279                                                                      | 0.0000                                                                        |
| Prph1              | peripherin 1                                                                           | NM_013639        | 0.847                                              | -0.278                                               | 0.0000                                           | 0.0000                                                                      | 0.0584                                                                        |
| Prss12             | protease, serine, 12<br>neurotrypsin<br>(motopsin)                                     | NM_008939        | 0.154                                              | -0.280                                               | 0.0222                                           | 0.3088                                                                      | 0.0449                                                                        |
| Prtn3              | proteinase 3                                                                           | NM_011178        | 0.319                                              | -0.334                                               | 0.0031                                           | 0.1061                                                                      | 0.0212                                                                        |
| Psat1              | phosphoserine<br>aminotransferase 1                                                    | NM_177420        | 0.283                                              | -0.168                                               | 0.0012                                           | 0.0123                                                                      | 0.0688                                                                        |
| Psd                | pleckstrin and Sec7<br>domain containing                                               | AK158685         | 0.587                                              | -0.166                                               | 0.0000                                           | 0.0000                                                                      | 0.0036                                                                        |
| Psd2               | pleckstrin and Sec7<br>domain containing 2                                             | NM_028707        | 0.345                                              | -0.224                                               | 0.0000                                           | 0.0000                                                                      | 0.0000                                                                        |
| Psmc3ip            | proteasome<br>(prosome,<br>macropain) 26S<br>subunit, ATPase 3,<br>interacting protein | NM_008949        | 0.387                                              | -0.385                                               | 0.0000                                           | 0.0064                                                                      | 0.0059                                                                        |
| Psmc6              | proteasome<br>(prosome,<br>macropain) 26S<br>subunit, ATPase, 6                        | NM_025959        | 0.211                                              | -0.210                                               | 0.0000                                           | 0.1793                                                                      | 0.0002                                                                        |
| Psmc6              | proteasome<br>(prosome,<br>macropain) 26S<br>subunit, non-ATPase,<br>6                 | NM_025550        | 0.226                                              | -0.185                                               | 0.0001                                           | 0.0378                                                                      | 0.0019                                                                        |
| Psmc1              | proteasome<br>(prosome,<br>macropain) 28<br>subunit, alpha                             | NM_026808        | 0.298                                              | -0.211                                               | 0.0001                                           | 0.0013                                                                      | 0.0330                                                                        |
| Psmc2              | proteasome<br>(prosome,<br>macropain) 28<br>subunit, beta                              | NM_011190        | 0.184                                              | -0.308                                               | 0.0172                                           | 0.4879                                                                      | 0.0191                                                                        |
| Pspc1              | paraspeckle protein 1                                                                  | AK160722         | 0.311                                              | -0.148                                               | 0.0000                                           | 0.0005                                                                      | 0.0516                                                                        |
| Ptcd2              | pentatricopeptide<br>repeat domain 2                                                   | NM_026873        | 0.444                                              | -0.127                                               | 0.0002                                           | 0.0019                                                                      | 0.0862                                                                        |
| Ptchd1             | NA                                                                                     | XM_911319        | 0.456                                              | -0.323                                               | 0.0000                                           | 0.0003                                                                      | 0.0030                                                                        |
| Ptdss1             | phosphatidylserine<br>synthase 1                                                       | NM_008959        | 0.395                                              | -0.069                                               | 0.0000                                           | 0.0000                                                                      | 0.2907                                                                        |
| Ptdss2             | phosphatidylserine<br>synthase 2                                                       | NM_013782        | 0.317                                              | -0.143                                               | 0.0000                                           | 0.0000                                                                      | 0.0016                                                                        |



**Table S1.** Continued.

| <b>Gene Symbol</b> | <b>Gene Name</b>                                  | <b>Entrez ID</b> | <b>Fold Change<br/><i>MECP2</i>-Tg<br/>over WT</b> | <b>Fold Change<br/><i>Mecp2</i>-null<br/>over WT</b> | <b>FDR-<br/>adjusted<br/>p-value<br/>(Total)</b> | <b>FDR-<br/>adjusted<br/>p-value<br/>(<i>MECP2</i>-<br/>Tg over<br/>WT)</b> | <b>FDR-<br/>adjusted<br/>p-value<br/>(<i>Mecp2</i>-<br/>null over<br/>WT)</b> |
|--------------------|---------------------------------------------------|------------------|----------------------------------------------------|------------------------------------------------------|--------------------------------------------------|-----------------------------------------------------------------------------|-------------------------------------------------------------------------------|
| Pter               | phosphotriesterase related                        | NM_008961        | 0.337                                              | -0.287                                               | 0.0127                                           | 0.0929                                                                      | 0.0963                                                                        |
| Ptgs1              | prostaglandin-endoperoxide synthase 1             | AY547265         | 0.406                                              | -0.190                                               | 0.0004                                           | 0.0032                                                                      | 0.0808                                                                        |
| Pthr2              | parathyroid hormone receptor 2                    | NM_139270        | 0.620                                              | -0.432                                               | 0.0000                                           | 0.0000                                                                      | 0.0004                                                                        |
| Ptn                | pleiotrophin                                      | AK133835         | 0.238                                              | -0.235                                               | 0.0052                                           | 0.3830                                                                      | 0.0076                                                                        |
| Ptplad1            | NA                                                | NM_021345        | 0.248                                              | -0.198                                               | 0.0000                                           | 0.0002                                                                      | 0.0029                                                                        |
| Ptplad2            | NA                                                | NM_025760        | 0.249                                              | -0.366                                               | 0.0219                                           | 0.2695                                                                      | 0.0521                                                                        |
| Ptpn5              | protein tyrosine phosphatase, non-receptor type 5 | NM_013643        | 0.318                                              | -0.232                                               | 0.0000                                           | 0.0000                                                                      | 0.0000                                                                        |
| Ptpnf              | protein tyrosine phosphatase, receptor type, F    | NM_011213        | 0.337                                              | -0.211                                               | 0.0000                                           | 0.0000                                                                      | 0.0000                                                                        |
| Ptpns              | protein tyrosine phosphatase, receptor type, S    | S59186           | 0.344                                              | -0.151                                               | 0.0000                                           | 0.0000                                                                      | 0.0000                                                                        |
| Pts                | 6-pyruvoyl-tetrahydropterin synthase              | AK160842         | 0.398                                              | -0.270                                               | 0.0043                                           | 0.0529                                                                      | 0.0601                                                                        |
| Pus3               | pseudouridine synthase 3                          | AK017552         | 0.293                                              | -0.166                                               | 0.0047                                           | 0.0304                                                                      | 0.1111                                                                        |
| Pus7               | NA                                                | XM_980945        | 0.096                                              | -0.326                                               | 0.0001                                           | 0.5056                                                                      | 0.0001                                                                        |
| Pwp1               | PWP1 homolog (S. cerevisiae)                      | NM_133993        | 0.352                                              | -0.100                                               | 0.0000                                           | 0.0001                                                                      | 0.2203                                                                        |
| Pxdn               | NA                                                | AK122223         | 0.300                                              | -0.153                                               | 0.0000                                           | 0.0000                                                                      | 0.0014                                                                        |
| Pxmp3              | peroxisomal membrane protein 3                    | NM_008994        | 0.324                                              | -0.393                                               | 0.0131                                           | 0.2028                                                                      | 0.0434                                                                        |
| Pycl               | pyrroline-5-carboxylate reductase-like            | NM_025412        | 0.342                                              | -0.193                                               | 0.0004                                           | 0.0278                                                                      | 0.0125                                                                        |
| Qpctl              | glutaminy-peptide cyclotransferase-like           | NM_175530        | 0.222                                              | -0.184                                               | 0.0042                                           | 0.0511                                                                      | 0.0609                                                                        |
| R74862             | expressed sequence R74862                         | AK034864         | 0.284                                              | -0.337                                               | 0.0464                                           | 0.1429                                                                      | 0.2077                                                                        |
| Rab13              | RAB13, member RAS oncogene family                 | AK080805         | 0.372                                              | -0.285                                               | 0.0003                                           | 0.0384                                                                      | 0.0073                                                                        |
| Rab15              | RAB15, member RAS oncogene family                 | NM_134050        | 0.267                                              | -0.237                                               | 0.0000                                           | 0.0037                                                                      | 0.0017                                                                        |

**Table S1.** Continued.

| <b>Gene Symbol</b> | <b>Gene Name</b>                                   | <b>Entrez ID</b> | <b>Fold Change<br/><i>MECP2</i>-Tg<br/>over WT</b> | <b>Fold Change<br/><i>Mecp2</i>-null<br/>over WT</b> | <b>FDR-<br/>adjusted<br/>p-value<br/>(Total)</b> | <b>FDR-<br/>adjusted<br/>p-value<br/>(<i>MECP2</i>-<br/>Tg over<br/>WT)</b> | <b>FDR-<br/>adjusted<br/>p-value<br/>(<i>Mecp2</i>-<br/>null over<br/>WT)</b> |
|--------------------|----------------------------------------------------|------------------|----------------------------------------------------|------------------------------------------------------|--------------------------------------------------|-----------------------------------------------------------------------------|-------------------------------------------------------------------------------|
| Rab34              | RAB34, member of RAS oncogene family               | XM_984679        | 0.576                                              | -0.211                                               | 0.0001                                           | 0.0143                                                                      | 0.0054                                                                        |
| Rab3b              | RAB3B, member of RAS oncogene family               | NM_023537        | 0.494                                              | -0.382                                               | 0.0000                                           | 0.0003                                                                      | 0.0009                                                                        |
| Rab40c             | Rab40c, member of RAS oncogene family              | NM_139154        | 0.415                                              | -0.118                                               | 0.0073                                           | 0.0191                                                                      | 0.2377                                                                        |
| Rab4b              | RAB4B, member of RAS oncogene family               | NM_019394        | 0.352                                              | -0.207                                               | 0.0048                                           | 0.0260                                                                      | 0.1284                                                                        |
| Rab71l1            | RAB7, member of RAS oncogene family-like 1         | AK137928         | 0.366                                              | -0.068                                               | 0.0402                                           | 0.0222                                                                      | 0.7162                                                                        |
| Rabep1             | rabaptin, RAB GTPase binding effector protein 1    | BC009814         | 0.288                                              | -0.180                                               | 0.0000                                           | 0.0004                                                                      | 0.0004                                                                        |
| Rabepk             | Rab9 effector protein with kelch motifs            | AK153022         | 0.222                                              | -0.186                                               | 0.0001                                           | 0.0177                                                                      | 0.0069                                                                        |
| Rabggta            | Rab geranylgeranyl transferase, a subunit          | NM_019519        | 0.301                                              | -0.201                                               | 0.0000                                           | 0.0000                                                                      | 0.0000                                                                        |
| Rabl2a             | RAB, member of RAS oncogene family-like 2A         | AK051232         | 0.267                                              | -0.142                                               | 0.0066                                           | 0.0574                                                                      | 0.0841                                                                        |
| Rabl4              | RAB, member of RAS oncogene family-like 4          | NM_025931        | 0.432                                              | -0.285                                               | 0.0002                                           | 0.0543                                                                      | 0.0027                                                                        |
| Rac3               | RAS-related C3 botulinum substrate 3               | NM_133223        | 0.927                                              | -0.566                                               | 0.0000                                           | 0.0002                                                                      | 0.0003                                                                        |
| Rad1               | RAD1 homolog (S. pombe)                            | AK168588         | 0.475                                              | -0.216                                               | 0.0122                                           | 0.0299                                                                      | 0.2553                                                                        |
| Rad51c             | Rad51 homolog c (S. cerevisiae)                    | AK136204         | 0.201                                              | -0.202                                               | 0.0028                                           | 0.0067                                                                      | 0.2405                                                                        |
| Rai1               | retinoic acid induced 1                            | NM_001037764     | 0.441                                              | -0.081                                               | 0.0000                                           | 0.0000                                                                      | 0.4340                                                                        |
| Rai12              | retinoic acid induced 12                           | BC115853         | 0.350                                              | -0.111                                               | 0.0007                                           | 0.0038                                                                      | 0.1253                                                                        |
| Ralgds             | ral guanine nucleotide dissociation stimulator     | NM_009058        | 0.488                                              | -0.202                                               | 0.0000                                           | 0.0000                                                                      | 0.0000                                                                        |
| Ramp2              | receptor (calcitonin) activity modifying protein 2 | NM_019444        | 0.589                                              | -0.114                                               | 0.0276                                           | 0.0275                                                                      | 0.4991                                                                        |

**Table S1.** Continued.

| <b>Gene Symbol</b> | <b>Gene Name</b>                                                                      | <b>Entrez ID</b> | <b>Fold Change<br/><i>MECP2</i>-Tg<br/>over WT</b> | <b>Fold Change<br/><i>Mecp2</i>-null<br/>over WT</b> | <b>FDR-<br/>adjusted<br/>p-value<br/>(Total)</b> | <b>FDR-<br/>adjusted<br/>p-value<br/>(<i>MECP2</i>-<br/>Tg over<br/>WT)</b> | <b>FDR-<br/>adjusted<br/>p-value<br/>(<i>Mecp2</i>-<br/>null over<br/>WT)</b> |
|--------------------|---------------------------------------------------------------------------------------|------------------|----------------------------------------------------|------------------------------------------------------|--------------------------------------------------|-----------------------------------------------------------------------------|-------------------------------------------------------------------------------|
| Ranbp1             | RAN binding protein 1                                                                 | NM_011239        | 0.443                                              | -0.305                                               | 0.0000                                           | 0.0023                                                                      | 0.0072                                                                        |
| Rangap1            | RAN GTPase activating protein 1                                                       | NM_011241        | 0.301                                              | -0.117                                               | 0.0000                                           | 0.0000                                                                      | 0.0003                                                                        |
| Rap2a              | RAS related protein 2a                                                                | AK018024         | 0.308                                              | -0.149                                               | 0.0141                                           | 0.0219                                                                      | 0.3602                                                                        |
| Rap2c              | RAP2C, member of RAS oncogene family                                                  | NM_172413        | 0.544                                              | -0.145                                               | 0.0009                                           | 0.0008                                                                      | 0.4344                                                                        |
| Rap2ip             | Rap2 interacting protein                                                              | BC046319         | 0.449                                              | -0.057                                               | 0.0000                                           | 0.0000                                                                      | 0.2411                                                                        |
| Rara               | retinoic acid receptor, alpha                                                         | BC038266         | 0.332                                              | -0.078                                               | 0.0053                                           | 0.0028                                                                      | 0.6528                                                                        |
| Rasa4              | RAS p21 protein activator 4                                                           | AK133565         | 0.445                                              | -0.118                                               | 0.0000                                           | 0.0000                                                                      | 0.2223                                                                        |
| Rasal1             | RAS protein activator like 1 (GAP1 like)                                              | NM_013832        | 0.267                                              | -0.244                                               | 0.0000                                           | 0.0001                                                                      | 0.0000                                                                        |
| Rasgrp2            | RAS, guanyl releasing protein 2                                                       | BC051474         | 0.540                                              | -0.430                                               | 0.0000                                           | 0.0000                                                                      | 0.0000                                                                        |
| Raver1             | NA                                                                                    | AK052443         | 0.318                                              | -0.130                                               | 0.0012                                           | 0.0125                                                                      | 0.0708                                                                        |
| Rbm13              | RNA binding motif protein 13                                                          | NM_026453        | 0.246                                              | -0.252                                               | 0.0001                                           | 0.0307                                                                      | 0.0033                                                                        |
| Rcbtb2             | regulator of chromosome condensation (RCC1) and BTB (POZ) domain containing protein 2 | NM_134083        | 0.419                                              | -0.041                                               | 0.0000                                           | 0.0000                                                                      | 0.7240                                                                        |
| Rcn1               | reticulocalbin 1                                                                      | NM_009037        | 0.556                                              | -0.440                                               | 0.0000                                           | 0.0003                                                                      | 0.0000                                                                        |
| Rcor2              | REST corepressor 2                                                                    | NM_054048        | 0.917                                              | -0.375                                               | 0.0000                                           | 0.0000                                                                      | 0.0040                                                                        |
| Rdbp               | RD RNA-binding protein                                                                | NM_001045863     | 0.252                                              | -0.208                                               | 0.0009                                           | 0.0314                                                                      | 0.0225                                                                        |
| Rdh11              | retinol dehydrogenase 11                                                              | NM_021557        | 0.219                                              | -0.228                                               | 0.0014                                           | 0.1309                                                                      | 0.0075                                                                        |
| Rdh12              | retinol dehydrogenase 12                                                              | AK164157         | 0.330                                              | -0.369                                               | 0.0012                                           | 0.0641                                                                      | 0.0144                                                                        |
| Rdh14              | retinol dehydrogenase 14 (all-trans and 9-cis)                                        | AK039931         | 0.616                                              | -0.500                                               | 0.0092                                           | 0.0927                                                                      | 0.0709                                                                        |
| Rdh5               | retinol dehydrogenase 5                                                               | NM_134006        | 0.183                                              | -0.306                                               | 0.0365                                           | 0.4631                                                                      | 0.0447                                                                        |
| Rfc3               | replication factor C (activator 1) 3                                                  | AK165891         | 0.509                                              | -0.255                                               | 0.0000                                           | 0.0026                                                                      | 0.0125                                                                        |

**Table S1.** Continued.

| <b>Gene Symbol</b> | <b>Gene Name</b>                                                                    | <b>Entrez ID</b> | <b>Fold Change<br/><i>MECP2</i>-Tg<br/>over WT</b> | <b>Fold Change<br/><i>Mecp2</i>-null<br/>over WT</b> | <b>FDR-<br/>adjusted<br/>p-value<br/>(Total)</b> | <b>FDR-<br/>adjusted<br/>p-value<br/>(<i>MECP2</i>-<br/>Tg over<br/>WT)</b> | <b>FDR-<br/>adjusted<br/>p-value<br/>(<i>Mecp2</i>-<br/>null over<br/>WT)</b> |
|--------------------|-------------------------------------------------------------------------------------|------------------|----------------------------------------------------|------------------------------------------------------|--------------------------------------------------|-----------------------------------------------------------------------------|-------------------------------------------------------------------------------|
| Rfx5               | NA                                                                                  | NM_017395        | 0.236                                              | -0.372                                               | 0.0000                                           | 0.0764                                                                      | 0.0001                                                                        |
| Rgag1              | NA                                                                                  | AK220382         | 0.662                                              | -0.872                                               | 0.0157                                           | 0.0781                                                                      | 0.1377                                                                        |
| Rgl2               | ral guanine<br>nucleotide<br>dissociation<br>stimulator-like 2                      | NM_009059        | 0.253                                              | -0.166                                               | 0.0000                                           | 0.0000                                                                      | 0.0100                                                                        |
| Rgs11              | regulator of G-<br>protein signaling 11                                             | XM_990503        | 0.617                                              | -0.398                                               | 0.0000                                           | 0.0000                                                                      | 0.0000                                                                        |
| Rgs19              | regulator of G-<br>protein signaling 19                                             | XM_990290        | 0.219                                              | -0.268                                               | 0.0298                                           | 0.3044                                                                      | 0.0610                                                                        |
| Rgs20              | regulator of G-<br>protein signaling 20                                             | NM_021374        | 0.556                                              | -0.439                                               | 0.0000                                           | 0.0056                                                                      | 0.0036                                                                        |
| Rhbdf1             | rhomboid family 1<br>( <i>Drosophila</i> )                                          | NM_010117        | 0.465                                              | -0.285                                               | 0.0000                                           | 0.0000                                                                      | 0.0000                                                                        |
| Rhbdl3             | NA                                                                                  | AJ313479         | 0.564                                              | -0.388                                               | 0.0000                                           | 0.0000                                                                      | 0.0001                                                                        |
| Rhoc               | ras homolog gene<br>family, member C                                                | NM_007484        | 0.631                                              | -0.334                                               | 0.0000                                           | 0.0002                                                                      | 0.0206                                                                        |
| Rhof               | ras homolog gene<br>family, member f                                                | NM_175092        | 0.394                                              | -0.256                                               | 0.0000                                           | 0.0002                                                                      | 0.0091                                                                        |
| Rhov               | ras homolog gene<br>family, member V                                                | NM_145530        | 0.604                                              | -0.212                                               | 0.0074                                           | 0.0055                                                                      | 0.5575                                                                        |
| Rhpn1              | rhophilin, Rho<br>GTPase binding<br>protein 1                                       | AK085338         | 0.279                                              | -0.189                                               | 0.0000                                           | 0.0019                                                                      | 0.0032                                                                        |
| Rhpn2              | rhophilin, Rho<br>GTPase binding<br>protein 2                                       | NM_027897        | 0.200                                              | -0.203                                               | 0.0009                                           | 0.0591                                                                      | 0.0113                                                                        |
| Ric8               | resistance to<br>inhibitors of<br>cholinesterase 8<br>homolog ( <i>C. elegans</i> ) | AK171093         | 0.317                                              | -0.093                                               | 0.0000                                           | 0.0000                                                                      | 0.2147                                                                        |
| Riok2              | RIO kinase 2 (yeast)                                                                | NM_025934        | 0.252                                              | -0.194                                               | 0.0000                                           | 0.0053                                                                      | 0.0005                                                                        |
| Rit1               | Ras-like without<br>CAAX 1                                                          | NM_009069        | 0.465                                              | -0.091                                               | 0.0011                                           | 0.0004                                                                      | 0.7400                                                                        |
| Rkhd1              | ring finger (C3HC4<br>type) and KH domain<br>containing 1                           | AK149801         | 0.343                                              | -0.272                                               | 0.0020                                           | 0.0796                                                                      | 0.0194                                                                        |
| Rnd1               | Rho family GTPase 1                                                                 | NM_172612        | 0.347                                              | -0.562                                               | 0.0000                                           | 0.0117                                                                      | 0.0001                                                                        |
| Rnd2               | Rho family GTPase 2                                                                 | AK075970         | 0.580                                              | -0.269                                               | 0.0000                                           | 0.0000                                                                      | 0.0001                                                                        |
| Rnf122             | ring finger protein<br>122                                                          | AK162034         | 0.258                                              | -0.234                                               | 0.0005                                           | 0.1042                                                                      | 0.0039                                                                        |
| Rnf13              | ring finger protein 13                                                              | AK082296         | 0.340                                              | -0.097                                               | 0.0005                                           | 0.0028                                                                      | 0.1187                                                                        |
| Rnf14              | ring finger protein 14                                                              | AK011316         | 0.329                                              | -0.078                                               | 0.0004                                           | 0.0009                                                                      | 0.2674                                                                        |

**Table S1.** Continued.

| <b>Gene Symbol</b> | <b>Gene Name</b>                                           | <b>Entrez ID</b> | <b>Fold Change<br/><i>MECP2</i>-Tg<br/>over WT</b> | <b>Fold Change<br/><i>Mecp2</i>-null<br/>over WT</b> | <b>FDR-<br/>adjusted<br/>p-value<br/>(Total)</b> | <b>FDR-<br/>adjusted<br/>p-value<br/>(<i>MECP2</i>-<br/>Tg over<br/>WT)</b> | <b>FDR-<br/>adjusted<br/>p-value<br/>(<i>Mecp2</i>-<br/>null over<br/>WT)</b> |
|--------------------|------------------------------------------------------------|------------------|----------------------------------------------------|------------------------------------------------------|--------------------------------------------------|-----------------------------------------------------------------------------|-------------------------------------------------------------------------------|
| Rnf2               | ring finger protein 2                                      | Y12880           | 0.387                                              | -0.131                                               | 0.0026                                           | 0.0114                                                                      | 0.1511                                                                        |
| Rnh1               | ribonuclease/angiogenin inhibitor 1                        | NM_145135        | 0.451                                              | -0.212                                               | 0.0003                                           | 0.0357                                                                      | 0.0074                                                                        |
| Rnpc3              | RNA-binding region (RNP1, RRM) containing 3                | NM_007446        | 0.353                                              | -0.221                                               | 0.0000                                           | 0.0049                                                                      | 0.0011                                                                        |
| Rnpep              | arginyl aminopeptidase (aminopeptidase B)                  | NM_145417        | 0.353                                              | -0.359                                               | 0.0000                                           | 0.0001                                                                      | 0.0000                                                                        |
| Rnu3b4             | NA                                                         | NR_002843        | 0.411                                              | -0.486                                               | 0.0309                                           | 0.6509                                                                      | 0.0229                                                                        |
| Robo3              | roundabout homolog 3 (Drosophila)                          | AK031746         | 0.372                                              | -0.050                                               | 0.0360                                           | 0.0138                                                                      | 0.8484                                                                        |
| Rp2h               | retinitis pigmentosa 2 homolog (human)                     | NM_133669        | 0.579                                              | -0.193                                               | 0.0002                                           | 0.0006                                                                      | 0.1742                                                                        |
| Rpa2               | replication proteinA2                                      | NM_011284        | 0.449                                              | -0.122                                               | 0.0004                                           | 0.0007                                                                      | 0.3024                                                                        |
| Rpl13              | ribosomal proteinL13                                       | XR_001880        | 0.783                                              | -0.100                                               | 0.0104                                           | 0.0114                                                                      | 0.4459                                                                        |
| Rpl14              | ribosomal proteinL14                                       | BC092249         | 0.426                                              | -0.136                                               | 0.0056                                           | 0.0172                                                                      | 0.2080                                                                        |
| Rpl35              | ribosomal proteinL35                                       | BC085091         | 0.405                                              | -0.174                                               | 0.0205                                           | 0.0146                                                                      | 0.5984                                                                        |
| Rpp14              | ribonuclease P 14 subunit (human)                          | NM_025938        | 0.428                                              | -0.160                                               | 0.0263                                           | 0.0462                                                                      | 0.3377                                                                        |
| Rpp40              | ribonuclease P 40 subunit (human)                          | NM_145938        | 0.206                                              | -0.344                                               | 0.0262                                           | 0.4311                                                                      | 0.0350                                                                        |
| Rprm               | reprimin, TP53 dependent G2 arrest mediator candidate      | NM_023396        | 0.322                                              | -0.199                                               | 0.0427                                           | 0.0558                                                                      | 0.4227                                                                        |
| Rps19bp1           | NA                                                         | NM_175109        | 0.339                                              | -0.100                                               | 0.0109                                           | 0.0093                                                                      | 0.5165                                                                        |
| Rps6ka4            | ribosomal protein S6 kinase, polypeptide 4                 | NM_019924        | 0.288                                              | -0.144                                               | 0.0000                                           | 0.0000                                                                      | 0.0022                                                                        |
| Rps6ka6            | ribosomal protein S6 kinase polypeptide 6                  | NM_025949        | 0.237                                              | -0.288                                               | 0.0000                                           | 0.0476                                                                      | 0.0002                                                                        |
| Rps6kl1            | ribosomal protein S6 kinase-like 1                         | NM_146244        | 0.270                                              | -0.131                                               | 0.0000                                           | 0.0010                                                                      | 0.0115                                                                        |
| Rragd              | Ras-related GTP binding D                                  | AF490406         | 0.414                                              | -0.138                                               | 0.0000                                           | 0.0003                                                                      | 0.0814                                                                        |
| Rras               | Harvey rat sarcoma oncogene, subgroupR                     | NM_009101        | 0.272                                              | -0.220                                               | 0.0035                                           | 0.1045                                                                      | 0.0242                                                                        |
| Rras2              | related RAS viral (ras) oncogene homolog 2                 | XM_978422        | 0.917                                              | -0.101                                               | 0.0235                                           | 0.0145                                                                      | 0.6558                                                                        |
| Rrn3               | RRN3 RNA polymerase I transcription factor homolog (yeast) | NM_001039521     | 0.312                                              | -0.129                                               | 0.0000                                           | 0.0000                                                                      | 0.0191                                                                        |

**Table S1.** Continued.

| <b>Gene Symbol</b> | <b>Gene Name</b>                                                             | <b>Entrez ID</b> | <b>Fold Change<br/><i>MECP2</i>-Tg<br/>over WT</b> | <b>Fold Change<br/><i>Mecp2</i>-null<br/>over WT</b> | <b>FDR-<br/>adjusted<br/>p-value<br/>(Total)</b> | <b>FDR-<br/>adjusted<br/>p-value<br/>(<i>MECP2</i>-<br/>Tg over<br/>WT)</b> | <b>FDR-<br/>adjusted<br/>p-value<br/>(<i>Mecp2</i>-<br/>null over<br/>WT)</b> |
|--------------------|------------------------------------------------------------------------------|------------------|----------------------------------------------------|------------------------------------------------------|--------------------------------------------------|-----------------------------------------------------------------------------|-------------------------------------------------------------------------------|
| Rshl3              | radial spokehead-like<br>3                                                   | XM_993152        | 0.561                                              | -0.241                                               | 0.0115                                           | 0.0199                                                                      | 0.3284                                                                        |
| Rspo3              | NA                                                                           | NM_028351        | 0.423                                              | -0.143                                               | 0.0036                                           | 0.0037                                                                      | 0.4419                                                                        |
| Rtbdn              | NA                                                                           | NM_144929        | 0.363                                              | -0.353                                               | 0.0001                                           | 0.0043                                                                      | 0.0111                                                                        |
| Rttm               | rotatin                                                                      | AK052059         | 0.218                                              | -0.218                                               | 0.0000                                           | 0.0000                                                                      | 0.0000                                                                        |
| Rusc1              | RUN and SH3<br>domain containing 1                                           | AK170012         | 0.403                                              | -0.115                                               | 0.0000                                           | 0.0000                                                                      | 0.0103                                                                        |
| Rusc2              | RUN and SH3<br>domain containing 2                                           | NM_199057        | 0.317                                              | -0.090                                               | 0.0001                                           | 0.0002                                                                      | 0.1324                                                                        |
| Rutbc2             | RUN and TBC1<br>domain containing 2                                          | NM_172718        | 0.294                                              | -0.265                                               | 0.0000                                           | 0.0000                                                                      | 0.0000                                                                        |
| S100a10            | S100 calcium<br>binding protein A10<br>(calpactin)                           | AK051143         | 1.007                                              | -0.639                                               | 0.0000                                           | 0.0007                                                                      | 0.0020                                                                        |
| Sacm11             | SAC1 (supressor of<br>actin mutations 1,<br>homolog)-like (S.<br>cerevisiae) | NM_030692        | 0.297                                              | -0.178                                               | 0.0000                                           | 0.0000                                                                      | 0.0000                                                                        |
| Samd10             | sterile alpha motif<br>domain containing 10                                  | NM_172676        | 0.232                                              | -0.198                                               | 0.0056                                           | 0.0613                                                                      | 0.0667                                                                        |
| Samd14             | NA                                                                           | NM_178049        | 0.685                                              | -0.377                                               | 0.0000                                           | 0.0000                                                                      | 0.0000                                                                        |
| Sar1a              | NA                                                                           | NM_009120        | 0.583                                              | -0.128                                               | 0.0001                                           | 0.0004                                                                      | 0.1554                                                                        |
| Sar1b              | NA                                                                           | NM_025535        | 0.459                                              | -0.069                                               | 0.0021                                           | 0.0010                                                                      | 0.6666                                                                        |
| Sardh              | sarcosine<br>dehydrogenase                                                   | NM_138665        | 0.341                                              | -0.217                                               | 0.0000                                           | 0.0000                                                                      | 0.0000                                                                        |
| Sart2              | squamous cell<br>carcinoma antigen<br>recognized by T cells<br>2             | NM_172508        | 0.448                                              | -0.173                                               | 0.0008                                           | 0.0025                                                                      | 0.1931                                                                        |
| Sat2               | spermidine/spermine<br>N1-acetyl transferase<br>2                            | BC061227         | 0.666                                              | -0.294                                               | 0.0000                                           | 0.0000                                                                      | 0.0274                                                                        |
| Sbk1               | SH3-binding kinase 1                                                         | XM_992744        | 0.578                                              | -0.217                                               | 0.0000                                           | 0.0002                                                                      | 0.0145                                                                        |
| Sccpdh             | saccharopine<br>dehydrogenase<br>(putative)                                  | AK081021         | 0.246                                              | -0.187                                               | 0.0000                                           | 0.0019                                                                      | 0.0140                                                                        |
| Scml2              | sex comb on midleg-<br>like 2 ( <i>Drosophila</i> )                          | XM_981005        | 0.131                                              | -0.535                                               | 0.0000                                           | 0.4102                                                                      | 0.0000                                                                        |
| Scn3b              | sodium channel,<br>voltage-gated, type<br>III, beta                          | NM_153522        | 0.330                                              | -0.375                                               | 0.0000                                           | 0.0001                                                                      | 0.0001                                                                        |

**Table S1.** Continued.

| <b>Gene Symbol</b> | <b>Gene Name</b>                                                                        | <b>Entrez ID</b> | <b>Fold Change<br/><i>MECP2</i>-Tg<br/>over WT</b> | <b>Fold Change<br/><i>Mecp2</i>-null<br/>over WT</b> | <b>FDR-<br/>adjusted<br/>p-value<br/>(Total)</b> | <b>FDR-<br/>adjusted<br/>p-value<br/>(<i>MECP2</i>-<br/>Tg over<br/>WT)</b> | <b>FDR-<br/>adjusted<br/>p-value<br/>(<i>Mecp2</i>-<br/>null over<br/>WT)</b> |
|--------------------|-----------------------------------------------------------------------------------------|------------------|----------------------------------------------------|------------------------------------------------------|--------------------------------------------------|-----------------------------------------------------------------------------|-------------------------------------------------------------------------------|
| Scn7a              | sodium channel, voltage-gated, type VII, alpha                                          | NM_009135        | 0.456                                              | -0.582                                               | 0.0000                                           | 0.0000                                                                      | 0.0000                                                                        |
| Scn9a              | sodium channel, voltage-gated, type IX, alpha                                           | XM_920936        | 0.146                                              | -0.469                                               | 0.0000                                           | 0.2501                                                                      | 0.0000                                                                        |
| Scp2               | sterol carrier protein 2, liver                                                         | NM_011327        | 0.226                                              | -0.214                                               | 0.0005                                           | 0.0284                                                                      | 0.0137                                                                        |
| Scrg1              | scrapie responsive gene 1                                                               | AJ223206         | 0.353                                              | -0.453                                               | 0.0011                                           | 0.0221                                                                      | 0.0384                                                                        |
| Scube3             | signal peptide, CUB domain, EGF-like 3                                                  | NM_001004366     | 0.341                                              | -0.231                                               | 0.0000                                           | 0.0000                                                                      | 0.0000                                                                        |
| Scye1              | small inducible cytokine subfamily E, member 1                                          | NM_007926        | 0.264                                              | -0.184                                               | 0.0063                                           | 0.1355                                                                      | 0.0331                                                                        |
| Sdc2               | syndecan 2                                                                              | NM_008304        | 0.224                                              | -0.271                                               | 0.0226                                           | 0.2686                                                                      | 0.0540                                                                        |
| Sdc3               | syndecan 3                                                                              | AK179937         | 0.311                                              | -0.218                                               | 0.0000                                           | 0.0001                                                                      | 0.0020                                                                        |
| Sec22c             | NA                                                                                      | NM_178677        | 0.591                                              | -0.138                                               | 0.0000                                           | 0.0000                                                                      | 0.3625                                                                        |
| Sec24c             | SEC24 related gene family, member C ( <i>S. cerevisiae</i> )                            | NM_172596        | 0.284                                              | -0.148                                               | 0.0000                                           | 0.0000                                                                      | 0.0000                                                                        |
| Sec61g             | NA                                                                                      | NM_011343        | 0.528                                              | -0.660                                               | 0.0177                                           | 0.0734                                                                      | 0.1618                                                                        |
| Selk               | NA                                                                                      | XM_910190        | 0.609                                              | -0.182                                               | 0.0003                                           | 0.0057                                                                      | 0.0362                                                                        |
| Sema3c             | sema domain, immunoglobulin domain (Ig), short basic domain, secreted, (semaphorin) 3C  | AK077231         | 0.437                                              | -0.032                                               | 0.0000                                           | 0.0000                                                                      | 0.8173                                                                        |
| Sema3d             | sema domain, immunoglobulin domain (Ig), short basic domain, secreted, (semaphorin) 3D  | AK163828         | 0.324                                              | -0.186                                               | 0.0000                                           | 0.0009                                                                      | 0.0295                                                                        |
| Sema3f             | sema domain, immunoglobulin domain (Ig), short basic domain, secreted, (semaphorin) 3 F | AK172610         | 0.391                                              | -0.330                                               | 0.0000                                           | 0.0000                                                                      | 0.0000                                                                        |

**Table S1.** Continued.

| <b>Gene Symbol</b> | <b>Gene Name</b>                                                                                                 | <b>Entrez ID</b> | <b>Fold Change<br/><i>MECP2</i>-Tg<br/>over WT</b> | <b>Fold Change<br/><i>Mecp2</i>-null<br/>over WT</b> | <b>FDR-<br/>adjusted<br/>p-value<br/>(Total)</b> | <b>FDR-<br/>adjusted<br/>p-value<br/>(<i>MECP2</i>-<br/>Tg over<br/>WT)</b> | <b>FDR-<br/>adjusted<br/>p-value<br/>(<i>Mecp2</i>-<br/>null over<br/>WT)</b> |
|--------------------|------------------------------------------------------------------------------------------------------------------|------------------|----------------------------------------------------|------------------------------------------------------|--------------------------------------------------|-----------------------------------------------------------------------------|-------------------------------------------------------------------------------|
| Sema4a             | sema domain, immunoglobulin domain (Ig), transmembrane domain (TM) and short cytoplasmic domain, (semaphorin) 4A | NM_013658        | 0.451                                              | -0.478                                               | 0.0000                                           | 0.0000                                                                      | 0.0000                                                                        |
| Sema4f             | sema domain, immunoglobulin domain (Ig), TM domain, and short cytoplasmic domain                                 | NM_011350        | 0.403                                              | -0.285                                               | 0.0000                                           | 0.0000                                                                      | 0.0000                                                                        |
| Sema6b             | sema domain, transmembrane domain (TM), and cytoplasmic domain, (semaphorin) 6B                                  | NM_013662        | 0.463                                              | -0.118                                               | 0.0029                                           | 0.0030                                                                      | 0.4346                                                                        |
| Sema6c             | sema domain, transmembrane domain (TM), and cytoplasmic domain, (semaphorin) 6C                                  | NM_011351        | 0.431                                              | -0.220                                               | 0.0000                                           | 0.0000                                                                      | 0.0000                                                                        |
| Senp3              | SUMO/sentrin specific peptidase 3                                                                                | XR_003084        | 0.526                                              | -0.238                                               | 0.0002                                           | 0.0139                                                                      | 0.0092                                                                        |
| Senp5              | SUMO/sentrin specific peptidase 5                                                                                | NM_177103        | 0.330                                              | -0.087                                               | 0.0000                                           | 0.0000                                                                      | 0.3273                                                                        |
| Sep15              | selenoprotein                                                                                                    | NM_053102        | 0.417                                              | -0.200                                               | 0.0002                                           | 0.0005                                                                      | 0.2176                                                                        |
| Sept3              | septin 3                                                                                                         | NM_011889        | 0.348                                              | -0.203                                               | 0.0000                                           | 0.0000                                                                      | 0.0000                                                                        |
| Sept6              | septin 6                                                                                                         | NM_019942        | 0.367                                              | -0.117                                               | 0.0005                                           | 0.0044                                                                      | 0.0802                                                                        |
| Sepx1              | selenoprotein X 1                                                                                                | AK003112         | 0.365                                              | -0.090                                               | 0.0075                                           | 0.0043                                                                      | 0.6445                                                                        |
| Serf2              | small EDRK-rich factor 2                                                                                         | BC092136         | 0.275                                              | -0.203                                               | 0.0134                                           | 0.4097                                                                      | 0.0188                                                                        |
| Serpinb1a          | serine (or cysteine) peptidase inhibitor, clade B, member 1a                                                     | NM_025429        | 0.166                                              | -0.440                                               | 0.0394                                           | 0.6279                                                                      | 0.0311                                                                        |
| Serpinb1b          | serine (or cysteine) peptidase inhibitor, clade B, member 1b                                                     | NM_173052        | 0.820                                              | -0.604                                               | 0.0000                                           | 0.0004                                                                      | 0.0007                                                                        |
| Serpinb6a          | serine (or cysteine) peptidase inhibitor, clade B, member 6a                                                     | XR_004911        | 0.337                                              | -0.220                                               | 0.0001                                           | 0.0050                                                                      | 0.0185                                                                        |



**Table S1.** Continued.

| <b>Gene Symbol</b> | <b>Gene Name</b>                                                   | <b>Entrez ID</b> | <b>Fold Change<br/><i>MECP2</i>-Tg<br/>over WT</b> | <b>Fold Change<br/><i>Mecp2</i>-null<br/>over WT</b> | <b>FDR-<br/>adjusted<br/>p-value<br/>(Total)</b> | <b>FDR-<br/>adjusted<br/>p-value<br/>(<i>MECP2</i>-<br/>Tg over<br/>WT)</b> | <b>FDR-<br/>adjusted<br/>p-value<br/>(<i>Mecp2</i>-<br/>null over<br/>WT)</b> |
|--------------------|--------------------------------------------------------------------|------------------|----------------------------------------------------|------------------------------------------------------|--------------------------------------------------|-----------------------------------------------------------------------------|-------------------------------------------------------------------------------|
| Serpinb6b          | serine (or cysteine)<br>peptidase inhibitor,<br>clade B, member 6b | NM_011454        | 0.318                                              | -0.443                                               | 0.0452                                           | 0.2731                                                                      | 0.1056                                                                        |
| Serpinb9           | serine (or cysteine)<br>peptidase inhibitor,<br>clade B, member 9  | NM_009256        | 0.389                                              | -0.501                                               | 0.0008                                           | 0.0529                                                                      | 0.0122                                                                        |
| Serpine1           | serine (or cysteine)<br>peptidase inhibitor,<br>clade E, member 1  | NM_008871        | 0.465                                              | -0.175                                               | 0.0000                                           | 0.0000                                                                      | 0.1154                                                                        |
| Serpinf1           | serine (or cysteine)<br>peptidase inhibitor,<br>clade F, member 1  | NM_011340        | 0.243                                              | -0.330                                               | 0.0012                                           | 0.0977                                                                      | 0.0095                                                                        |
| Serping1           | serine (or cysteine)<br>peptidase inhibitor,<br>clade G, member 1  | NM_009776        | 0.426                                              | -0.136                                               | 0.0030                                           | 0.0064                                                                      | 0.2620                                                                        |
| Serpini1           | serine (or cysteine)<br>peptidase inhibitor,<br>clade I, member 1  | NM_009250        | 0.166                                              | -0.256                                               | 0.0001                                           | 0.1867                                                                      | 0.0004                                                                        |
| Sez6               | seizure related gene 6                                             | AK032277         | 0.361                                              | -0.178                                               | 0.0000                                           | 0.0000                                                                      | 0.0000                                                                        |
| Sfrp5              | secreted frizzled-<br>related sequence<br>protein 5                | NM_018780        | 0.454                                              | -0.365                                               | 0.0000                                           | 0.0001                                                                      | 0.0021                                                                        |
| Sgpl1              | sphingosine<br>phosphate lyase 1                                   | NM_009163        | 0.317                                              | -0.189                                               | 0.0000                                           | 0.0003                                                                      | 0.0000                                                                        |
| Sh2d5              | SH2 domain<br>containing 5                                         | XM_914492        | 0.300                                              | -0.230                                               | 0.0000                                           | 0.0001                                                                      | 0.0003                                                                        |
| Sh3bgr1            | SH3-binding domain<br>glutamic acid-rich<br>protein like           | NM_019989        | 0.288                                              | -0.226                                               | 0.0045                                           | 0.0558                                                                      | 0.0600                                                                        |
| Sh3bp2             | SH3-domain binding<br>protein 2                                    | NM_011893        | 0.222                                              | -0.276                                               | 0.0029                                           | 0.0879                                                                      | 0.0249                                                                        |
| Sh3bp5l            | SH3 binding domain<br>protein 5 like                               | NM_024480        | 0.342                                              | -0.077                                               | 0.0067                                           | 0.0072                                                                      | 0.4437                                                                        |
| Sh3glb2            | SH3-domain GRB2-<br>like endophilin B2                             | NM_139302        | 0.385                                              | -0.127                                               | 0.0000                                           | 0.0000                                                                      | 0.0272                                                                        |
| Sh3yl1             | Sh3 domain YSC-<br>like 1                                          | BC061488         | 0.374                                              | -0.356                                               | 0.0002                                           | 0.0047                                                                      | 0.0403                                                                        |
| Shc1               | src homology 2<br>domain-containing<br>transforming protein<br>C1  | AK036980         | 0.567                                              | -0.313                                               | 0.0000                                           | 0.0000                                                                      | 0.0000                                                                        |
| Shc4               | NA                                                                 | AK036946         | 0.306                                              | -0.198                                               | 0.0000                                           | 0.0005                                                                      | 0.0551                                                                        |

**Table S1.** Continued.

| <b>Gene Symbol</b> | <b>Gene Name</b>                                                                       | <b>Entrez ID</b> | <b>Fold Change<br/><i>MECP2</i>-Tg<br/>over WT</b> | <b>Fold Change<br/><i>Mecp2</i>-null<br/>over WT</b> | <b>FDR-<br/>adjusted<br/>p-value<br/>(Total)</b> | <b>FDR-<br/>adjusted<br/>p-value<br/>(<i>MECP2</i>-<br/>Tg over<br/>WT)</b> | <b>FDR-<br/>adjusted<br/>p-value<br/>(<i>Mecp2</i>-<br/>null over<br/>WT)</b> |
|--------------------|----------------------------------------------------------------------------------------|------------------|----------------------------------------------------|------------------------------------------------------|--------------------------------------------------|-----------------------------------------------------------------------------|-------------------------------------------------------------------------------|
| Shd                | src homology 2<br>domain-containing<br>transforming protein<br>D                       | NM_009168        | 0.345                                              | -0.275                                               | 0.0002                                           | 0.0357                                                                      | 0.0041                                                                        |
| Shf                | NA                                                                                     | NM_001013829     | 0.238                                              | -0.234                                               | 0.0000                                           | 0.0744                                                                      | 0.0004                                                                        |
| Shfm1              | split hand/foot<br>malformation<br>(ectrodactyly) type 1                               | NM_009169        | 0.526                                              | -0.121                                               | 0.0018                                           | 0.0038                                                                      | 0.2584                                                                        |
| Shmt2              | serine hydroxymethyl<br>transferase 2<br>(mitochondrial)                               | NM_028230        | 0.191                                              | -0.223                                               | 0.0005                                           | 0.0311                                                                      | 0.0130                                                                        |
| Siae               | NA                                                                                     | AF156856         | 0.203                                              | -0.229                                               | 0.0000                                           | 0.0003                                                                      | 0.0000                                                                        |
| Sidt1              | SID1 transmembrane<br>family, member 1                                                 | AK046836         | 0.417                                              | -0.295                                               | 0.0000                                           | 0.0000                                                                      | 0.0000                                                                        |
| Sim1               | single-minded<br>homolog 1<br>(Drosophila)                                             | NM_011376        | 0.189                                              | -0.235                                               | 0.0077                                           | 0.1505                                                                      | 0.0362                                                                        |
| Six5               | sine oculis-related<br>homeobox 5<br>homolog<br>(Drosophila)                           | NM_011383        | 0.252                                              | -0.347                                               | 0.0037                                           | 0.1792                                                                      | 0.0140                                                                        |
| Six6os1            | Six6 opposite strand<br>transcript 1                                                   | AK044729         | 0.367                                              | -0.436                                               | 0.0000                                           | 0.0013                                                                      | 0.0000                                                                        |
| Skap1              | NA                                                                                     | AK040068         | 0.174                                              | -0.229                                               | 0.0335                                           | 0.2010                                                                      | 0.1100                                                                        |
| Skap2              | NA                                                                                     | NM_018773        | 0.257                                              | -0.144                                               | 0.0123                                           | 0.0273                                                                      | 0.2753                                                                        |
| Slbp               | stem-loop binding<br>protein                                                           | AK131729         | 0.394                                              | -0.254                                               | 0.0096                                           | 0.1678                                                                      | 0.0397                                                                        |
| Slc10a4            | NA                                                                                     | NM_173403        | 0.247                                              | -0.378                                               | 0.0264                                           | 0.1702                                                                      | 0.1045                                                                        |
| Slc12a5            | solute carrier family<br>12, member 5                                                  | NM_020333        | 0.307                                              | -0.125                                               | 0.0000                                           | 0.0000                                                                      | 0.0000                                                                        |
| Slc13a4            | solute carrier family<br>13 (sodium/sulfate<br>symporters), member<br>4                | NM_172892        | 0.637                                              | -0.122                                               | 0.0000                                           | 0.0000                                                                      | 0.4532                                                                        |
| Slc13a5            | solute carrier family<br>13 (sodium-<br>dependent citrate<br>transporter), member<br>5 | NM_001004148     | 0.321                                              | -0.316                                               | 0.0046                                           | 0.0774                                                                      | 0.0438                                                                        |
| Slc16a11           | solute carrier family<br>16 (monocarboxylic<br>acid transporters),<br>member 11        | NM_153081        | 0.450                                              | -0.513                                               | 0.0000                                           | 0.0286                                                                      | 0.0000                                                                        |

**Table S1.** Continued.

| <b>Gene Symbol</b> | <b>Gene Name</b>                                                                  | <b>Entrez ID</b> | <b>Fold Change<br/><i>MECP2</i>-Tg<br/>over WT</b> | <b>Fold Change<br/><i>Mecp2</i>-null<br/>over WT</b> | <b>FDR-<br/>adjusted<br/>p-value<br/>(Total)</b> | <b>FDR-<br/>adjusted<br/>p-value<br/>(<i>MECP2</i>-<br/>Tg over<br/>WT)</b> | <b>FDR-<br/>adjusted<br/>p-value<br/>(<i>Mecp2</i>-<br/>null over<br/>WT)</b> |
|--------------------|-----------------------------------------------------------------------------------|------------------|----------------------------------------------------|------------------------------------------------------|--------------------------------------------------|-----------------------------------------------------------------------------|-------------------------------------------------------------------------------|
| Slc16a4            | solute carrier family 16 (monocarboxylic acid transporters), member 4             | BC025441         | 0.148                                              | -0.267                                               | 0.0049                                           | 0.3376                                                                      | 0.0085                                                                        |
| Slc16a9            | solute carrier family 16 (monocarboxylic acid transporters), member 9             | NM_025807        | 0.320                                              | -0.153                                               | 0.0054                                           | 0.0120                                                                      | 0.2640                                                                        |
| Slc18a2            | solute carrier family 18 (vesicular monoamine), member 2                          | AK034368         | 0.029                                              | -0.465                                               | 0.0000                                           | 0.8220                                                                      | 0.0000                                                                        |
| Slc1a4             | solute carrier family 1 (glutamate/neutral amino acid transporter), member 4      | NM_018861        | 0.282                                              | -0.208                                               | 0.0000                                           | 0.0116                                                                      | 0.0012                                                                        |
| Slc1a5             | solute carrier family 1 (neutral amino acid transporter), member 5                | NM_009201        | 0.396                                              | -0.183                                               | 0.0044                                           | 0.0122                                                                      | 0.2215                                                                        |
| Slc1a6             | solute carrier family 1 (high affinity aspartate/glutamate transporter), member 6 | NM_009200        | 0.244                                              | -0.252                                               | 0.0003                                           | 0.0492                                                                      | 0.0049                                                                        |
| Slc22a17           | solute carrier family 22 (organic cation transporter), member 17                  | NM_010112        | 0.330                                              | -0.081                                               | 0.0000                                           | 0.0000                                                                      | 0.0995                                                                        |
| Slc22a21           | solute carrier family 22 (organic cation transporter), member 21                  | AK080177         | 0.292                                              | -0.259                                               | 0.0048                                           | 0.1472                                                                      | 0.0230                                                                        |
| Slc22a5            | solute carrier family 22 (organic cation transporter), member 5                   | NM_011396        | 0.290                                              | -0.231                                               | 0.0000                                           | 0.0009                                                                      | 0.0006                                                                        |
| Slc25a1            | solute carrier family 25 (mitochondrial carrier, citrate transporter), member 1   | NM_153150        | 0.302                                              | -0.262                                               | 0.0000                                           | 0.0000                                                                      | 0.0000                                                                        |

**Table S1.** Continued.

| <b>Gene Symbol</b> | <b>Gene Name</b>                                                                        | <b>Entrez ID</b> | <b>Fold Change<br/><i>MECP2</i>-Tg<br/>over WT</b> | <b>Fold Change<br/><i>Mecp2</i>-null<br/>over WT</b> | <b>FDR-<br/>adjusted<br/>p-value<br/>(Total)</b> | <b>FDR-<br/>adjusted<br/>p-value<br/>(<i>MECP2</i>-<br/>Tg over<br/>WT)</b> | <b>FDR-<br/>adjusted<br/>p-value<br/>(<i>Mecp2</i>-<br/>null over<br/>WT)</b> |
|--------------------|-----------------------------------------------------------------------------------------|------------------|----------------------------------------------------|------------------------------------------------------|--------------------------------------------------|-----------------------------------------------------------------------------|-------------------------------------------------------------------------------|
| Slc25a14           | solute carrier family 25 (mitochondrial carrier, brain), member 14                      | AK148277         | 0.202                                              | -0.252                                               | 0.0000                                           | 0.1257                                                                      | 0.0000                                                                        |
| Slc25a20           | solute carrier family 25 (mitochondrial carnitine/acylcarnitine translocase), member 20 | NM_020520        | 0.379                                              | -0.147                                               | 0.0000                                           | 0.0001                                                                      | 0.0721                                                                        |
| Slc25a22           | solute carrier family 25 (mitochondrial carrier, glutamate), member 22                  | BC050887         | 0.338                                              | -0.129                                               | 0.0000                                           | 0.0000                                                                      | 0.0994                                                                        |
| Slc25a24           | solute carrier family 25 (mitochondrial carrier, phosphate carrier), member 24          | NM_172685        | 0.328                                              | -0.239                                               | 0.0007                                           | 0.0043                                                                      | 0.1094                                                                        |
| Slc25a33           | NA                                                                                      | NM_027460        | 0.449                                              | -0.127                                               | 0.0000                                           | 0.0000                                                                      | 0.1928                                                                        |
| Slc25a39           | NA                                                                                      | NM_026542        | 0.306                                              | -0.114                                               | 0.0013                                           | 0.0034                                                                      | 0.2158                                                                        |
| Slc26a6            | solute carrier family 26, member 6                                                      | AK053088         | 0.426                                              | -0.161                                               | 0.0000                                           | 0.0001                                                                      | 0.0661                                                                        |
| Slc27a3            | solute carrier family 27 (fatty acid transporter),member3                               | NM_011988        | 0.658                                              | -0.345                                               | 0.0000                                           | 0.0000                                                                      | 0.0012                                                                        |
| Slc27a4            | solute carrier family 27 (fatty acid transporter),member4                               | NM_011989        | 0.374                                              | -0.201                                               | 0.0000                                           | 0.0000                                                                      | 0.0000                                                                        |
| Slc29a1            | solute carrier family 29 (nucleoside transporters), member 1                            | NM_008302        | 0.344                                              | -0.269                                               | 0.0000                                           | 0.0000                                                                      | 0.0000                                                                        |
| Slc29a4            | solute carrier family 29 (nucleoside transporters), member 4                            | NM_146257        | 0.243                                              | -0.324                                               | 0.0000                                           | 0.0104                                                                      | 0.0040                                                                        |
| Slc2a5             | solute carrier family 2 (facilitated glucose transporter),member5                       | NM_019741        | 0.142                                              | -0.286                                               | 0.0022                                           | 0.2856                                                                      | 0.0046                                                                        |
| Slc30a10           | solute carrier family 30, member 10                                                     | NM_001033286     | 0.356                                              | -0.175                                               | 0.0072                                           | 0.0575                                                                      | 0.0914                                                                        |
| Slc30a7            | solute carrier family 30 (zinc transporter), member 7                                   | NM_023214        | 0.434                                              | -0.218                                               | 0.0000                                           | 0.0000                                                                      | 0.0040                                                                        |

**Table S1.** Continued.

| <b>Gene Symbol</b> | <b>Gene Name</b>                                                    | <b>Entrez ID</b> | <b>Fold Change<br/><i>MECP2</i>-Tg<br/>over WT</b> | <b>Fold Change<br/><i>Mecp2</i>-null<br/>over WT</b> | <b>FDR-<br/>adjusted<br/>p-value<br/>(Total)</b> | <b>FDR-<br/>adjusted<br/>p-value<br/>(<i>MECP2</i>-<br/>Tg over<br/>WT)</b> | <b>FDR-<br/>adjusted<br/>p-value<br/>(<i>Mecp2</i>-<br/>null over<br/>WT)</b> |
|--------------------|---------------------------------------------------------------------|------------------|----------------------------------------------------|------------------------------------------------------|--------------------------------------------------|-----------------------------------------------------------------------------|-------------------------------------------------------------------------------|
| Slc31a1            | solute carrier family 31, member 1                                  | NM_175090        | 0.475                                              | -0.203                                               | 0.0022                                           | 0.0059                                                                      | 0.2204                                                                        |
| Slc32a1            | solute carrier family 32 (GABA vesicular transporter),member1       | XM_979351        | 0.341                                              | -0.086                                               | 0.0420                                           | 0.0240                                                                      | 0.7052                                                                        |
| Slc35a1            | solute carrier family 35 (CMP-sialic acid transporter),member1      | AK005650         | 0.278                                              | -0.189                                               | 0.0089                                           | 0.0512                                                                      | 0.1233                                                                        |
| Slc35a2            | solute carrier family 35 (UDP-galactose transporter),member2        | NM_078484        | 0.347                                              | -0.151                                               | 0.0087                                           | 0.0491                                                                      | 0.1253                                                                        |
| Slc35b1            | solute carrier family 35, member B1                                 | NM_016752        | 0.415                                              | -0.101                                               | 0.0114                                           | 0.0321                                                                      | 0.2261                                                                        |
| Slc35b3            | solute carrier family 35, member B3                                 | AK141280         | 0.332                                              | -0.238                                               | 0.0000                                           | 0.0006                                                                      | 0.0121                                                                        |
| Slc35c1            | solute carrier family 35, member C1                                 | NM_145832        | 0.417                                              | -0.229                                               | 0.0028                                           | 0.0086                                                                      | 0.1951                                                                        |
| Slc35e4            | solute carrier family 35, member E4                                 | NM_153142        | 0.411                                              | -0.125                                               | 0.0043                                           | 0.0180                                                                      | 0.1593                                                                        |
| Slc35f1            | solute carrier family 35, member F1                                 | NM_178675        | 0.277                                              | -0.239                                               | 0.0000                                           | 0.0016                                                                      | 0.0115                                                                        |
| Slc35f5            | solute carrier family 35, member F5                                 | NM_028787        | 0.305                                              | -0.111                                               | 0.0000                                           | 0.0000                                                                      | 0.1283                                                                        |
| Slc37a1            | solute carrier family 37 (glycerol-3-phosphate transporter),member1 | AK163990         | 0.293                                              | -0.145                                               | 0.0001                                           | 0.0003                                                                      | 0.1163                                                                        |
| Slc37a4            | solute carrier family 37 (glycerol-6-phosphate transporter),member4 | NM_008063        | 0.410                                              | -0.001                                               | 0.0009                                           | 0.0002                                                                      | 0.9973                                                                        |
| Slc38a3            | solute carrier family 38, member 3                                  | NM_023805        | 0.404                                              | -0.159                                               | 0.0000                                           | 0.0000                                                                      | 0.0001                                                                        |
| Slc38a5            | solute carrier family 38, member 5                                  | NM_172479        | 0.371                                              | -0.196                                               | 0.0000                                           | 0.0022                                                                      | 0.0156                                                                        |
| Slc39a12           | solute carrier family 39 (zinc transporter), member 12              | NM_001012305     | 0.274                                              | -0.205                                               | 0.0000                                           | 0.2028                                                                      | 0.0000                                                                        |
| Slc39a6            | solute carrier family 39 (metal ion transporter),member6            | NM_139143        | 0.336                                              | -0.140                                               | 0.0000                                           | 0.0002                                                                      | 0.0417                                                                        |
| Slc44a2            | solute carrier family 44, member 2                                  | AK043924         | 0.247                                              | -0.155                                               | 0.0000                                           | 0.0003                                                                      | 0.0038                                                                        |
| Slc45a1            | NA                                                                  | NM_173774        | 0.310                                              | -0.106                                               | 0.0007                                           | 0.0073                                                                      | 0.0707                                                                        |

**Table S1.** Continued.

| <b>Gene Symbol</b> | <b>Gene Name</b>                                                                | <b>Entrez ID</b> | <b>Fold Change<br/><i>MECP2</i>-Tg<br/>over WT</b> | <b>Fold Change<br/><i>Mecp2</i>-null<br/>over WT</b> | <b>FDR-<br/>adjusted<br/>p-value<br/>(Total)</b> | <b>FDR-<br/>adjusted<br/>p-value<br/>(<i>MECP2</i>-<br/>Tg over<br/>WT)</b> | <b>FDR-<br/>adjusted<br/>p-value<br/>(<i>Mecp2</i>-<br/>null over<br/>WT)</b> |
|--------------------|---------------------------------------------------------------------------------|------------------|----------------------------------------------------|------------------------------------------------------|--------------------------------------------------|-----------------------------------------------------------------------------|-------------------------------------------------------------------------------|
| Slc4a2             | solute carrier family 4 (anion exchanger), member 2                             | NM_009207        | 0.320                                              | -0.259                                               | 0.0000                                           | 0.0000                                                                      | 0.0000                                                                        |
| Slc4a7             | solute carrier family 4, sodium bicarbonate cotransporter, member 7             | NM_001033270     | 0.333                                              | -0.158                                               | 0.0000                                           | 0.0000                                                                      | 0.0064                                                                        |
| Slc5a5             | solute carrier family 5 (sodium iodide symporter), member 5                     | NM_053248        | 0.418                                              | -0.168                                               | 0.0000                                           | 0.0000                                                                      | 0.1087                                                                        |
| Slc5a7             | solute carrier family 5 (choline transporter), member 7                         | AK164116         | 0.340                                              | -0.320                                               | 0.0008                                           | 0.0350                                                                      | 0.0192                                                                        |
| Slc6a13            | solute carrier family 6 (neurotransmitter transporter, GABA), member 13         | NM_144512        | 0.702                                              | -0.130                                               | 0.0000                                           | 0.0000                                                                      | 0.1834                                                                        |
| Slc6a15            | solute carrier family 6 (neurotransmitter transporter), member 15               | NM_175328        | 0.487                                              | -0.316                                               | 0.0000                                           | 0.0000                                                                      | 0.0000                                                                        |
| Slc6a3             | solute carrier family 6 (neurotransmitter transporter, dopamine), member 3      | NM_010020        | 0.133                                              | -0.444                                               | 0.0023                                           | 0.3145                                                                      | 0.0043                                                                        |
| Slc6a7             | solute carrier family 6 (neurotransmitter transporter, L-proline), member 7     | NM_201353        | 0.370                                              | -0.237                                               | 0.0000                                           | 0.0000                                                                      | 0.0000                                                                        |
| Slc6a8             | solute carrier family 6 (neurotransmitter transporter, creatine), member 8      | NM_133987        | 0.211                                              | -0.248                                               | 0.0000                                           | 0.0525                                                                      | 0.0000                                                                        |
| Slc6a9             | solute carrier family 6 (neurotransmitter transporter, glycine), member 9       | NM_008135        | 0.260                                              | -0.187                                               | 0.0000                                           | 0.0000                                                                      | 0.0000                                                                        |
| Slc7a10            | solute carrier family 7 (cationic amino acid transporter, y+ system), member 10 | BC027516         | 0.492                                              | -0.207                                               | 0.0000                                           | 0.0000                                                                      | 0.0000                                                                        |

**Table S1.** Continued.

| <b>Gene Symbol</b> | <b>Gene Name</b>                                                                                  | <b>Entrez ID</b> | <b>Fold Change<br/><i>MECP2</i>-Tg<br/>over WT</b> | <b>Fold Change<br/><i>Mecp2</i>-null<br/>over WT</b> | <b>FDR-<br/>adjusted<br/>p-value<br/>(Total)</b> | <b>FDR-<br/>adjusted<br/>p-value<br/>(<i>MECP2</i>-<br/>Tg over<br/>WT)</b> | <b>FDR-<br/>adjusted<br/>p-value<br/>(<i>Mecp2</i>-<br/>null over<br/>WT)</b> |
|--------------------|---------------------------------------------------------------------------------------------------|------------------|----------------------------------------------------|------------------------------------------------------|--------------------------------------------------|-----------------------------------------------------------------------------|-------------------------------------------------------------------------------|
| Slc7a3             | solute carrier family 7 (cationic amino acid transporter, y+ system), member 3                    | AK141558         | 0.513                                              | -0.474                                               | 0.0000                                           | 0.0017                                                                      | 0.0000                                                                        |
| Slc7a4             | solute carrier family 7 (cationic amino acid transporter, y+ system), member 4                    | NM_144852        | 0.417                                              | -0.278                                               | 0.0000                                           | 0.0082                                                                      | 0.0022                                                                        |
| Slc8a2             | solute carrier family 8 (sodium/calcium exchanger), member 2                                      | NM_148946        | 0.397                                              | -0.117                                               | 0.0003                                           | 0.0001                                                                      | 0.6448                                                                        |
| Slc9a5             | NA                                                                                                | XM_915379        | 0.346                                              | -0.337                                               | 0.0000                                           | 0.0000                                                                      | 0.0000                                                                        |
| Slco1c1            | solute carrier organic anion transporter family, member 1c1                                       | NM_021471        | 0.271                                              | -0.202                                               | 0.0000                                           | 0.0006                                                                      | 0.0020                                                                        |
| Slco2a1            | solute carrier organic anion transporter family, member 2a1                                       | NM_033314        | 0.525                                              | -0.223                                               | 0.0000                                           | 0.0000                                                                      | 0.0433                                                                        |
| Slitrk4            | SLIT and NTRK-like family, member 4                                                               | NM_178740        | 0.517                                              | -0.470                                               | 0.0000                                           | 0.0005                                                                      | 0.0082                                                                        |
| Smarca1            | SWI/SNF related, matrix associated, actin dependent regulator of chromatin, subfamily a, member 1 | NM_053123        | 0.215                                              | -0.355                                               | 0.0000                                           | 0.0000                                                                      | 0.0000                                                                        |
| Smarca5            | SWI/SNF related, matrix associated, actin dependent regulator of chromatin, subfamily a, member 5 | XM_620137        | 0.191                                              | -0.295                                               | 0.0018                                           | 0.3007                                                                      | 0.0034                                                                        |
| Smc2               | NA                                                                                                | BC021847         | 0.434                                              | -0.361                                               | 0.0000                                           | 0.0000                                                                      | 0.0000                                                                        |
| Smcr7              | Smith-Magenis syndrome chromosome region, candidate 7 homolog (human)                             | NM_001009927     | 0.442                                              | -0.011                                               | 0.0221                                           | 0.0058                                                                      | 0.9759                                                                        |
| Smpd3              | sphingomyelin phosphodiesterase 3, neutral                                                        | NM_021491        | 0.297                                              | -0.122                                               | 0.0264                                           | 0.0541                                                                      | 0.2991                                                                        |
| Smpd3a             | sphingomyelin phosphodiesterase, acid-like 3A                                                     | NM_020561        | 0.260                                              | -0.255                                               | 0.0010                                           | 0.2310                                                                      | 0.0027                                                                        |

**Table S1.** Continued.

| <b>Gene Symbol</b> | <b>Gene Name</b>                                                               | <b>Entrez ID</b> | <b>Fold Change<br/><i>MECP2</i>-Tg<br/>over WT</b> | <b>Fold Change<br/><i>Mecp2</i>-null<br/>over WT</b> | <b>FDR-<br/>adjusted<br/>p-value<br/>(Total)</b> | <b>FDR-<br/>adjusted<br/>p-value<br/>(<i>MECP2</i>-<br/>Tg over<br/>WT)</b> | <b>FDR-<br/>adjusted<br/>p-value<br/>(<i>Mecp2</i>-<br/>null over<br/>WT)</b> |
|--------------------|--------------------------------------------------------------------------------|------------------|----------------------------------------------------|------------------------------------------------------|--------------------------------------------------|-----------------------------------------------------------------------------|-------------------------------------------------------------------------------|
| Smtn               | smoothelin                                                                     | NM_013870        | 0.448                                              | -0.301                                               | 0.0000                                           | 0.0000                                                                      | 0.0000                                                                        |
| Snapc1             | small nuclear RNA<br>activating complex,<br>polypeptide 1                      | NM_178392        | 0.246                                              | -0.228                                               | 0.0002                                           | 0.0525                                                                      | 0.0034                                                                        |
| Snf8               | SNF8, ESCRT-II<br>complex subunit,<br>homolog (S.<br><i>cerevisiae</i> )       | AK180940         | 0.698                                              | -0.106                                               | 0.0009                                           | 0.0021                                                                      | 0.2426                                                                        |
| Snrpa1             | small nuclear<br>ribonucleoprotein<br>polypeptide A'                           | AK152546         | 0.487                                              | -0.217                                               | 0.0006                                           | 0.0020                                                                      | 0.1680                                                                        |
| Snrpb              | small nuclear<br>ribonucleoprotein B                                           | NM_009225        | 0.415                                              | -0.037                                               | 0.0008                                           | 0.0002                                                                      | 0.8436                                                                        |
| Snupn              | NA                                                                             | BC023317         | 0.116                                              | -0.289                                               | 0.0111                                           | 0.4920                                                                      | 0.0118                                                                        |
| Snx26              | sorting nexin 26                                                               | NM_178252        | 0.547                                              | -0.376                                               | 0.0000                                           | 0.0000                                                                      | 0.0000                                                                        |
| Snx7               | sorting nexin 7                                                                | XM_001005105     | 0.133                                              | -0.344                                               | 0.0003                                           | 0.4820                                                                      | 0.0003                                                                        |
| Snx8               | sorting nexin 8                                                                | BC019142         | 0.381                                              | -0.073                                               | 0.0001                                           | 0.0001                                                                      | 0.4844                                                                        |
| Sord               | NA                                                                             | NM_146126        | 0.117                                              | -0.289                                               | 0.0000                                           | 0.0351                                                                      | 0.0003                                                                        |
| Spag6              | sperm associated<br>antigen 6                                                  | AK054199         | 0.681                                              | -0.542                                               | 0.0000                                           | 0.0000                                                                      | 0.0000                                                                        |
| Spast              | NA                                                                             | AK044900         | 0.207                                              | -0.195                                               | 0.0000                                           | 0.0018                                                                      | 0.0010                                                                        |
| Spata6             | spermatogenesis<br>associated 6                                                | NM_026470        | 0.362                                              | -0.261                                               | 0.0000                                           | 0.0023                                                                      | 0.0041                                                                        |
| Spcs1              | signal peptidase<br>complex subunit 1<br>homolog (S.<br><i>cerevisiae</i> )    | BC020050         | 0.544                                              | -0.208                                               | 0.0008                                           | 0.0127                                                                      | 0.0482                                                                        |
| Speer8-ps1         | spermatogenesis<br>associated glutamate<br>(E)-rich protein 8,<br>pseudogene 1 | NR_001584        | 0.284                                              | -0.541                                               | 0.0366                                           | 0.0759                                                                      | 0.2969                                                                        |
| Spfh1              | SPFH domain family,<br>member 1                                                | BC021793         | 0.228                                              | -0.214                                               | 0.0001                                           | 0.0244                                                                      | 0.0018                                                                        |
| Spin2              | NA                                                                             | NM_001005370     | 0.447                                              | -0.447                                               | 0.0118                                           | 0.1983                                                                      | 0.0399                                                                        |
| Spink10            | NA                                                                             | BC049733         | 0.829                                              | -0.523                                               | 0.0000                                           | 0.0001                                                                      | 0.0240                                                                        |
| Spint2             | serine protease<br>inhibitor, Kunitz type<br>2                                 | AF099020         | 0.438                                              | -0.307                                               | 0.0000                                           | 0.0055                                                                      | 0.0007                                                                        |
| Spock3             | sparc/osteonectin,<br>cwcw and kazal-like<br>domains<br>proteoglycan 3         | AJ278998         | 0.310                                              | -0.113                                               | 0.0000                                           | 0.0003                                                                      | 0.0419                                                                        |



**Table S1.** Continued.

| <b>Gene Symbol</b> | <b>Gene Name</b>                                                       | <b>Entrez ID</b> | <b>Fold Change<br/><i>MECP2</i>-Tg<br/>over WT</b> | <b>Fold Change<br/><i>Mecp2</i>-null<br/>over WT</b> | <b>FDR-<br/>adjusted<br/>p-value<br/>(Total)</b> | <b>FDR-<br/>adjusted<br/>p-value<br/>(<i>MECP2</i>-<br/>Tg over<br/>WT)</b> | <b>FDR-<br/>adjusted<br/>p-value<br/>(<i>Mecp2</i>-<br/>null over<br/>WT)</b> |
|--------------------|------------------------------------------------------------------------|------------------|----------------------------------------------------|------------------------------------------------------|--------------------------------------------------|-----------------------------------------------------------------------------|-------------------------------------------------------------------------------|
| Spred3             | sprouty-related,<br>EVH1 domain<br>containing 3                        | NM_182927        | 0.242                                              | -0.201                                               | 0.0372                                           | 0.0600                                                                      | 0.3598                                                                        |
| Sptlc1             | serine<br>palmitoyltransferase,<br>long chain base<br>subunit 1        | NM_009269        | 0.293                                              | -0.138                                               | 0.0000                                           | 0.0000                                                                      | 0.0455                                                                        |
| Sra1               | steroid receptor RNA<br>activator 1                                    | NM_025291        | 0.533                                              | -0.180                                               | 0.0007                                           | 0.0024                                                                      | 0.1860                                                                        |
| Srd5a2l            | steroid 5 alpha-<br>reductase 2-like                                   | NM_020611        | 0.421                                              | -0.232                                               | 0.0002                                           | 0.0030                                                                      | 0.0485                                                                        |
| Srp14              | signal recognition<br>particle 14                                      | NM_009273        | 0.685                                              | -0.167                                               | 0.0069                                           | 0.0076                                                                      | 0.4325                                                                        |
| Srpk3              | NA                                                                     | NM_019684        | 0.242                                              | -0.288                                               | 0.0001                                           | 0.0217                                                                      | 0.0023                                                                        |
| Srpx2              | sushi-repeat-<br>containing protein,<br>X-linked 2                     | NM_026838        | 0.192                                              | -0.334                                               | 0.0002                                           | 0.1614                                                                      | 0.0009                                                                        |
| Ssbp1              | single-stranded DNA<br>binding protein 1                               | AK090272         | 0.435                                              | -0.224                                               | 0.0026                                           | 0.0211                                                                      | 0.0889                                                                        |
| Ssbp4              | single stranded DNA<br>binding protein 4                               | NM_133772        | 0.398                                              | -0.073                                               | 0.0000                                           | 0.0000                                                                      | 0.3438                                                                        |
| Ssh3               | slingshot homolog 3<br>( <i>Drosophila</i> )                           | AK038981         | 0.446                                              | -0.235                                               | 0.0000                                           | 0.0000                                                                      | 0.0000                                                                        |
| Ssr2               | signal sequence<br>receptor, beta                                      | NM_025448        | 0.256                                              | -0.179                                               | 0.0063                                           | 0.1920                                                                      | 0.0226                                                                        |
| Ssr4               | signal sequence<br>receptor, delta                                     | AK142600         | 0.392                                              | -0.160                                               | 0.0035                                           | 0.0533                                                                      | 0.0491                                                                        |
| Sssca1             | Sjogren's<br>syndrome/scleroderm<br>a autoantigen 1<br>homolog (human) | NM_020491        | 0.425                                              | -0.199                                               | 0.0113                                           | 0.0167                                                                      | 0.3674                                                                        |
| Sst                | somatostatin                                                           | NM_009215        | 0.668                                              | -0.501                                               | 0.0045                                           | 0.1518                                                                      | 0.0206                                                                        |
| Sstr1              | somatostatin receptor<br>1                                             | NM_009216        | 0.160                                              | -0.308                                               | 0.0093                                           | 0.4208                                                                      | 0.0123                                                                        |
| Ssu72              | Ssu72 RNA<br>polymerase II CTD<br>phosphatase homolog<br>(yeast)       | NM_026899        | 0.566                                              | -0.004                                               | 0.0265                                           | 0.0068                                                                      | 0.9889                                                                        |
| Ssx9               | NA                                                                     | NM_199063        | 4.517                                              | -0.016                                               | 0.0059                                           | 0.0013                                                                      | 0.9855                                                                        |

**Table S1.** Continued.

| <b>Gene Symbol</b> | <b>Gene Name</b>                                                                                                                  | <b>Entrez ID</b> | <b>Fold Change<br/><i>MECP2</i>-Tg<br/>over WT</b> | <b>Fold Change<br/><i>Mecp2</i>-null<br/>over WT</b> | <b>FDR-<br/>adjusted<br/>p-value<br/>(Total)</b> | <b>FDR-<br/>adjusted<br/>p-value<br/>(<i>MECP2</i>-<br/>Tg over<br/>WT)</b> | <b>FDR-<br/>adjusted<br/>p-value<br/>(<i>Mecp2</i>-<br/>null over<br/>WT)</b> |
|--------------------|-----------------------------------------------------------------------------------------------------------------------------------|------------------|----------------------------------------------------|------------------------------------------------------|--------------------------------------------------|-----------------------------------------------------------------------------|-------------------------------------------------------------------------------|
| St6galnac6         | ST6 (alpha-N-acetyl-<br>neuraminyl-2,3-beta-<br>galactosyl-1,3)-N-<br>acetylgalactosaminid<br>e alpha-2,6-<br>sialyltransferase 6 | AK030648         | 0.553                                              | -0.237                                               | 0.0000                                           | 0.0000                                                                      | 0.0072                                                                        |
| St8sia4            | ST8 alpha-N-acetyl-<br>neuraminidase alpha-<br>2,8-sialyltransferase4                                                             | NM_009183        | 0.296                                              | -0.149                                               | 0.0044                                           | 0.0085                                                                      | 0.2910                                                                        |
| Stard3             | START domain<br>containing 3                                                                                                      | AK160480         | 0.382                                              | -0.268                                               | 0.0000                                           | 0.0000                                                                      | 0.0001                                                                        |
| Stard3nl           | STARD3 N-terminal<br>like                                                                                                         | AK018331         | 0.487                                              | -0.113                                               | 0.0170                                           | 0.0284                                                                      | 0.3449                                                                        |
| Stard4             | StAR-related lipid<br>transfer (START)<br>domain containing 4                                                                     | NM_133774        | 0.425                                              | -0.174                                               | 0.0004                                           | 0.0109                                                                      | 0.0289                                                                        |
| Stat6              | signal transducer and<br>activator of<br>transcription 6                                                                          | AK149563         | 0.319                                              | -0.169                                               | 0.0000                                           | 0.0000                                                                      | 0.0098                                                                        |
| Stc1               | stanniocalcin 1                                                                                                                   | NM_009285        | 0.514                                              | -0.630                                               | 0.0000                                           | 0.0010                                                                      | 0.0005                                                                        |
| Stch               | stress 70 protein<br>chaperone,<br>microsome-<br>associated, human<br>homolog                                                     | M33214           | 0.312                                              | -0.171                                               | 0.0008                                           | 0.0201                                                                      | 0.0311                                                                        |
| Stk36              | serine/threonine<br>kinase 36 (fused<br>homolog,<br><i>Drosophila</i> )                                                           | AK029842         | 0.257                                              | -0.160                                               | 0.0000                                           | 0.0000                                                                      | 0.0032                                                                        |
| Stk38              | serine/threonine<br>kinase 38                                                                                                     | AK020024         | 0.302                                              | -0.127                                               | 0.0000                                           | 0.0001                                                                      | 0.0673                                                                        |
| Stmn1              | stathmin 1                                                                                                                        | AB064953         | 0.471                                              | -0.238                                               | 0.0000                                           | 0.0030                                                                      | 0.0007                                                                        |
| Stoml1             | stomatin-like 1                                                                                                                   | AK148324         | 0.330                                              | -0.101                                               | 0.0120                                           | 0.0201                                                                      | 0.3370                                                                        |
| Stra13             | stimulated by retinoic<br>acid 13                                                                                                 | NM_016665        | 0.346                                              | -0.289                                               | 0.0001                                           | 0.0030                                                                      | 0.0142                                                                        |
| Stra6              | stimulated by retinoic<br>acid gene 6                                                                                             | AK083120         | 0.362                                              | -0.157                                               | 0.0008                                           | 0.0011                                                                      | 0.3715                                                                        |
| Stx1a              | syntaxin 1A (brain)                                                                                                               | AK144399         | 0.250                                              | -0.348                                               | 0.0000                                           | 0.0219                                                                      | 0.0000                                                                        |
| Stx3               | syntaxin 3                                                                                                                        | NM_001025307     | 0.279                                              | -0.382                                               | 0.0000                                           | 0.0060                                                                      | 0.0000                                                                        |
| Stx5a              | syntaxin 5A                                                                                                                       | AK002722         | 0.321                                              | -0.112                                               | 0.0000                                           | 0.0008                                                                      | 0.0417                                                                        |
| Stxbp2             | syntaxin binding<br>protein 2                                                                                                     | NM_011503        | 0.273                                              | -0.213                                               | 0.0000                                           | 0.0000                                                                      | 0.0001                                                                        |
| Styk1              | serine/threonine/tyros<br>ine kinase 1                                                                                            | NM_172891        | 0.610                                              | -0.273                                               | 0.0000                                           | 0.0002                                                                      | 0.1178                                                                        |

**Table S1.** Continued.

| <b>Gene Symbol</b> | <b>Gene Name</b>                                                         | <b>Entrez ID</b> | <b>Fold Change<br/><i>MECP2</i>-Tg<br/>over WT</b> | <b>Fold Change<br/><i>Mecp2</i>-null<br/>over WT</b> | <b>FDR-<br/>adjusted<br/>p-value<br/>(Total)</b> | <b>FDR-<br/>adjusted<br/>p-value<br/>(<i>MECP2</i>-<br/>Tg over<br/>WT)</b> | <b>FDR-<br/>adjusted<br/>p-value<br/>(<i>Mecp2</i>-<br/>null over<br/>WT)</b> |
|--------------------|--------------------------------------------------------------------------|------------------|----------------------------------------------------|------------------------------------------------------|--------------------------------------------------|-----------------------------------------------------------------------------|-------------------------------------------------------------------------------|
| Styx               | phosphoserine/threonine/tyrosine interaction protein                     | BC085089         | 0.467                                              | -0.100                                               | 0.0002                                           | 0.0001                                                                      | 0.6011                                                                        |
| Suclg1             | succinate-CoA ligase, GDP-forming, alpha subunit                         | NM_019879        | 0.581                                              | -0.052                                               | 0.0184                                           | 0.0217                                                                      | 0.4359                                                                        |
| Suclg2             | succinate-Coenzyme A ligase, GDP-forming, beta subunit                   | AK167339         | 0.292                                              | -0.109                                               | 0.0177                                           | 0.0220                                                                      | 0.4204                                                                        |
| Sumf1              | sulfatase modifying factor 1                                             | NM_145937        | 0.327                                              | -0.154                                               | 0.0000                                           | 0.0002                                                                      | 0.0166                                                                        |
| Surf2              | surfeit gene 2                                                           | NM_013678        | 0.497                                              | -0.089                                               | 0.0063                                           | 0.0050                                                                      | 0.5320                                                                        |
| Surf4              | surfeit gene 4                                                           | NM_011512        | 0.378                                              | -0.209                                               | 0.0000                                           | 0.0006                                                                      | 0.0267                                                                        |
| Sv2a               | synaptic vesicle glycoprotein 2 a                                        | NM_022030        | 0.271                                              | -0.163                                               | 0.0000                                           | 0.0000                                                                      | 0.0001                                                                        |
| Syap1              | synapse associated protein 1                                             | NM_025932        | 0.423                                              | -0.161                                               | 0.0014                                           | 0.0043                                                                      | 0.1952                                                                        |
| Sycp3              | synaptonemal complex protein 3                                           | NM_011517        | 0.264                                              | -0.482                                               | 0.0026                                           | 0.3482                                                                      | 0.0043                                                                        |
| Syncrip            | synaptotagmin binding, cytoplasmic RNA interacting protein               | NM_019666        | 0.347                                              | -0.212                                               | 0.0000                                           | 0.0001                                                                      | 0.0000                                                                        |
| Syngr3             | synaptogyrin 3                                                           | NM_011522        | 0.219                                              | -0.190                                               | 0.0004                                           | 0.0512                                                                      | 0.0071                                                                        |
| Syt10              | synaptotagmin X                                                          | NM_018803        | 0.064                                              | -0.345                                               | 0.0001                                           | 0.6283                                                                      | 0.0001                                                                        |
| Syt3               | synaptotagmin III                                                        | NM_016663        | 0.348                                              | -0.148                                               | 0.0000                                           | 0.0000                                                                      | 0.0059                                                                        |
| Syt5               | synaptotagmin V                                                          | NM_016908        | 0.335                                              | -0.366                                               | 0.0000                                           | 0.0023                                                                      | 0.0000                                                                        |
| Syt15              | NA                                                                       | NM_177704        | 0.241                                              | -0.317                                               | 0.0001                                           | 0.0361                                                                      | 0.0018                                                                        |
| Tac1               | tachykinin 1                                                             | NM_009311        | 0.895                                              | -0.872                                               | 0.0000                                           | 0.0000                                                                      | 0.0000                                                                        |
| Tacc3              | transforming, acidic coiled-coil containing protein 3                    | AK076282         | 0.316                                              | -0.209                                               | 0.0000                                           | 0.0006                                                                      | 0.0537                                                                        |
| Tacr3              | tachykinin receptor 3                                                    | NM_021382        | 0.380                                              | -0.609                                               | 0.0000                                           | 0.0174                                                                      | 0.0000                                                                        |
| Tacstd2            | tumor-associated calcium signal transducer 2                             | NM_020047        | 0.641                                              | -0.356                                               | 0.0210                                           | 0.0195                                                                      | 0.5154                                                                        |
| Taf5               | TAF5 RNA polymerase II, TATA box binding protein (TBP)-associated factor | NM_177342        | 0.168                                              | -0.239                                               | 0.0066                                           | 0.2698                                                                      | 0.0156                                                                        |

**Table S1.** Continued.

| <b>Gene Symbol</b> | <b>Gene Name</b>                                                                 | <b>Entrez ID</b> | <b>Fold Change<br/><i>MECP2</i>-Tg<br/>over WT</b> | <b>Fold Change<br/><i>Mecp2</i>-null<br/>over WT</b> | <b>FDR-<br/>adjusted<br/>p-value<br/>(Total)</b> | <b>FDR-<br/>adjusted<br/>p-value<br/>(<i>MECP2</i>-<br/>Tg over<br/>WT)</b> | <b>FDR-<br/>adjusted<br/>p-value<br/>(<i>Mecp2</i>-<br/>null over<br/>WT)</b> |
|--------------------|----------------------------------------------------------------------------------|------------------|----------------------------------------------------|------------------------------------------------------|--------------------------------------------------|-----------------------------------------------------------------------------|-------------------------------------------------------------------------------|
| Taf6l              | TAF6-like RNA polymerase II, p300/CBP-associated factor (PCAF)-associated factor | AK077149         | 0.572                                              | -0.235                                               | 0.0000                                           | 0.0000                                                                      | 0.0059                                                                        |
| Tagln3             | transgelin 3                                                                     | AK012333         | 0.429                                              | -0.112                                               | 0.0006                                           | 0.0017                                                                      | 0.2166                                                                        |
| Taldo1             | transaldolase 1                                                                  | NM_011528        | 0.299                                              | -0.350                                               | 0.0003                                           | 0.1749                                                                      | 0.0010                                                                        |
| Tasp1              | NA                                                                               | AK050603         | 0.303                                              | -0.178                                               | 0.0001                                           | 0.0020                                                                      | 0.0214                                                                        |
| Tbc1d10a           | TBC1 domain family, member 10a                                                   | BC037230         | 0.323                                              | -0.184                                               | 0.0004                                           | 0.0015                                                                      | 0.1532                                                                        |
| Tbc1d10b           | TBC1 domain family, member 10b                                                   | NM_144522        | 0.366                                              | -0.095                                               | 0.0000                                           | 0.0000                                                                      | 0.1095                                                                        |
| Tbc1d12            | TBC1D12: TBC1 domain family, member 12                                           | NM_145952        | 0.338                                              | -0.129                                               | 0.0000                                           | 0.0001                                                                      | 0.0616                                                                        |
| Tbc1d20            | TBC1 domain family, member 20                                                    | BC086617         | 0.336                                              | -0.126                                               | 0.0061                                           | 0.0134                                                                      | 0.2687                                                                        |
| Tbccd1             | NA                                                                               | BC082558         | 0.465                                              | -0.095                                               | 0.0006                                           | 0.0005                                                                      | 0.4668                                                                        |
| Tbl3               | transducin (beta)-like 3                                                         | AK081572         | 0.396                                              | -0.092                                               | 0.0000                                           | 0.0000                                                                      | 0.1547                                                                        |
| Tbrg1              | transforming growth factor beta regulated gene 1                                 | NM_025289        | 0.420                                              | -0.135                                               | 0.0000                                           | 0.0006                                                                      | 0.0562                                                                        |
| Tbx18              | T-box18                                                                          | AK012980         | 0.309                                              | -0.113                                               | 0.0374                                           | 0.0334                                                                      | 0.5420                                                                        |
| Tceal5             | NA                                                                               | NM_177919        | 0.454                                              | -0.276                                               | 0.0323                                           | 0.1308                                                                      | 0.1624                                                                        |
| Tcf19              | transcription factor 19                                                          | NM_025674        | 0.333                                              | -0.320                                               | 0.0430                                           | 0.0833                                                                      | 0.3150                                                                        |
| Tcirg1             | T-cell, immune regulator 1                                                       | NM_016921        | 0.284                                              | -0.196                                               | 0.0000                                           | 0.0000                                                                      | 0.0001                                                                        |
| Tegt               | testis enhanced gene transcript                                                  | NM_026669        | 0.317                                              | -0.106                                               | 0.0001                                           | 0.0001                                                                      | 0.2802                                                                        |
| Tekt2              | tektin 2                                                                         | NM_011902        | 0.245                                              | -0.358                                               | 0.0052                                           | 0.0681                                                                      | 0.0557                                                                        |
| Telo2              | NA                                                                               | NM_027880        | 0.341                                              | -0.106                                               | 0.0000                                           | 0.0000                                                                      | 0.0638                                                                        |
| Tep1               | telomerase associated protein 1                                                  | NM_009351        | 0.233                                              | -0.216                                               | 0.0017                                           | 0.0309                                                                      | 0.0421                                                                        |
| Tex261             | testis expressed gene 261                                                        | AK170049         | 0.535                                              | -0.129                                               | 0.0000                                           | 0.0000                                                                      | 0.2916                                                                        |
| Tex264             | testis expressed gene 264                                                        | AK159046         | 0.311                                              | -0.175                                               | 0.0009                                           | 0.0125                                                                      | 0.0530                                                                        |
| Tfpi               | tissue factor pathway inhibitor                                                  | AF004833         | 0.315                                              | -0.389                                               | 0.0018                                           | 0.1383                                                                      | 0.0092                                                                        |
| Tgfb1              | transforming growth factor, beta 1                                               | NM_011577        | 0.261                                              | -0.177                                               | 0.0235                                           | 0.0759                                                                      | 0.2027                                                                        |

**Table S1.** Continued.

| <b>Gene Symbol</b> | <b>Gene Name</b>                                                         | <b>Entrez ID</b> | <b>Fold Change<br/><i>MECP2</i>-Tg<br/>over WT</b> | <b>Fold Change<br/><i>Mecp2</i>-null<br/>over WT</b> | <b>FDR-<br/>adjusted<br/>p-value<br/>(Total)</b> | <b>FDR-<br/>adjusted<br/>p-value<br/>(<i>MECP2</i>-<br/>Tg over<br/>WT)</b> | <b>FDR-<br/>adjusted<br/>p-value<br/>(<i>Mecp2</i>-<br/>null over<br/>WT)</b> |
|--------------------|--------------------------------------------------------------------------|------------------|----------------------------------------------------|------------------------------------------------------|--------------------------------------------------|-----------------------------------------------------------------------------|-------------------------------------------------------------------------------|
| Tgfbli1            | transforming growth factor beta 1 induced transcript 1                   | DQ143891         | 0.175                                              | -0.269                                               | 0.0008                                           | 0.1046                                                                      | 0.0054                                                                        |
| Th                 | tyrosine hydroxylase                                                     | AK139568         | 0.177                                              | -0.444                                               | 0.0000                                           | 0.0414                                                                      | 0.0000                                                                        |
| Thbs3              | thrombospondin 3                                                         | NM_013691        | 0.544                                              | -0.309                                               | 0.0000                                           | 0.0000                                                                      | 0.0000                                                                        |
| Them4              | thioesterase superfamily member 4                                        | AK139993         | 0.943                                              | -0.353                                               | 0.0002                                           | 0.0008                                                                      | 0.1350                                                                        |
| Thoc6              | NA                                                                       | BC089551         | 0.305                                              | -0.137                                               | 0.0001                                           | 0.0010                                                                      | 0.0749                                                                        |
| Thop1              | thimet oligopeptidase 1                                                  | BC031722         | 0.351                                              | -0.120                                               | 0.0000                                           | 0.0001                                                                      | 0.0515                                                                        |
| Thpo               | thrombopoietin                                                           | BC003803         | 0.450                                              | -0.283                                               | 0.0025                                           | 0.0037                                                                      | 0.3465                                                                        |
| Thra               | thyroid hormone receptor alpha                                           | BC046795         | 0.375                                              | -0.070                                               | 0.0000                                           | 0.0000                                                                      | 0.1875                                                                        |
| Thrap4             | thyroid hormone receptor associated protein 4                            | NM_011869        | 0.261                                              | -0.142                                               | 0.0000                                           | 0.0000                                                                      | 0.0000                                                                        |
| Thrap5             | thyroid hormone receptor associated protein 5                            | NM_198107        | 0.328                                              | -0.116                                               | 0.0000                                           | 0.0000                                                                      | 0.0579                                                                        |
| Thrap6             | thyroid hormone receptor associated protein 6                            | NM_027212        | 0.580                                              | -0.207                                               | 0.0361                                           | 0.0551                                                                      | 0.3757                                                                        |
| Thumpd3            | THUMP domain containing 3                                                | NM_008188        | 0.303                                              | -0.198                                               | 0.0139                                           | 0.0657                                                                      | 0.1454                                                                        |
| Timm17b            | translocator of inner mitochondrial membrane 17b                         | NM_011591        | 0.320                                              | -0.121                                               | 0.0001                                           | 0.0000                                                                      | 0.6076                                                                        |
| Timm50             | translocase of inner mitochondrial membrane 50 homolog (yeast)           | NM_025616        | 0.407                                              | -0.162                                               | 0.0000                                           | 0.0000                                                                      | 0.0127                                                                        |
| Timm8a1            | NA                                                                       | NM_013898        | 0.581                                              | -0.288                                               | 0.0018                                           | 0.0089                                                                      | 0.1305                                                                        |
| Tipr1              | TIP41, TOR signalling pathway regulator-like ( <i>S. cerevisiae</i> )    | NM_145513        | 0.298                                              | -0.151                                               | 0.0035                                           | 0.0088                                                                      | 0.2320                                                                        |
| Tlcd1              | NA                                                                       | AK002703         | 0.292                                              | -0.246                                               | 0.0000                                           | 0.0009                                                                      | 0.0161                                                                        |
| Tle1               | transducin-like enhancer of split 1, homolog of <i>Drosophila</i> E(spl) | NM_011599        | 0.420                                              | -0.087                                               | 0.0000                                           | 0.0000                                                                      | 0.2748                                                                        |

**Table S1.** Continued.

| <b>Gene Symbol</b> | <b>Gene Name</b>                                                           | <b>Entrez ID</b> | <b>Fold Change<br/><i>MECP2</i>-Tg<br/>over WT</b> | <b>Fold Change<br/><i>Mecp2</i>-null<br/>over WT</b> | <b>FDR-<br/>adjusted<br/>p-value<br/>(Total)</b> | <b>FDR-<br/>adjusted<br/>p-value<br/>(<i>MECP2</i>-<br/>Tg over<br/>WT)</b> | <b>FDR-<br/>adjusted<br/>p-value<br/>(<i>Mecp2</i>-<br/>null over<br/>WT)</b> |
|--------------------|----------------------------------------------------------------------------|------------------|----------------------------------------------------|------------------------------------------------------|--------------------------------------------------|-----------------------------------------------------------------------------|-------------------------------------------------------------------------------|
| Tle2               | transducin-like<br>enhancer of split 2,<br>homolog of<br>Drosophila E(spl) | NM_019725        | 0.490                                              | -0.340                                               | 0.0000                                           | 0.0000                                                                      | 0.0000                                                                        |
| Tll1               | tolloid-like                                                               | NM_009390        | 0.348                                              | -0.363                                               | 0.0000                                           | 0.0000                                                                      | 0.0000                                                                        |
| Tm6sf2             | transmembrane 6<br>superfamily member<br>2                                 | NM_181540        | 0.341                                              | -0.065                                               | 0.0479                                           | 0.0233                                                                      | 0.7737                                                                        |
| Tm7sf2             | transmembrane 7<br>superfamily member<br>2                                 | AK003717         | 0.483                                              | -0.262                                               | 0.0000                                           | 0.0000                                                                      | 0.0033                                                                        |
| Tm9sf2             | transmembrane 9<br>superfamily member<br>2                                 | NM_080556        | 0.216                                              | -0.335                                               | 0.0000                                           | 0.0121                                                                      | 0.0000                                                                        |
| Tmbim4             | transmembrane BAX<br>inhibitor motif<br>containing 4                       | NM_026617        | 0.405                                              | -0.147                                               | 0.0002                                           | 0.0009                                                                      | 0.1201                                                                        |
| Tmc4               | transmembrane<br>channel-like gene<br>family 4                             | NM_027203        | 0.414                                              | -0.157                                               | 0.0000                                           | 0.0001                                                                      | 0.1872                                                                        |
| Tmco3              | transmembrane and<br>coiled-coil domains 3                                 | AK083321         | 0.339                                              | -0.123                                               | 0.0000                                           | 0.0000                                                                      | 0.0073                                                                        |
| Tmco5              | NA                                                                         | NM_026104        | 0.298                                              | -0.415                                               | 0.0346                                           | 0.3903                                                                      | 0.0524                                                                        |
| Tmem126a           | NA                                                                         | AK210038         | 0.342                                              | -0.726                                               | 0.0033                                           | 0.2684                                                                      | 0.0077                                                                        |
| Tmem128            | NA                                                                         | AK076679         | 0.391                                              | -0.215                                               | 0.0001                                           | 0.0035                                                                      | 0.0131                                                                        |
| Tmem132a           | NA                                                                         | NM_133804        | 0.561                                              | -0.279                                               | 0.0000                                           | 0.0000                                                                      | 0.0000                                                                        |
| Tmem132e           | NA                                                                         | AK134540         | 0.373                                              | -0.397                                               | 0.0000                                           | 0.0000                                                                      | 0.0000                                                                        |
| Tmem141            | NA                                                                         | NM_001040130     | 0.424                                              | -0.342                                               | 0.0000                                           | 0.0011                                                                      | 0.0045                                                                        |
| Tmem147            | NA                                                                         | BC035323         | 0.428                                              | -0.130                                               | 0.0004                                           | 0.0048                                                                      | 0.0683                                                                        |
| Tmem150            | NA                                                                         | NM_144916        | 0.510                                              | -0.321                                               | 0.0000                                           | 0.0000                                                                      | 0.0005                                                                        |
| Tmem158            | NA                                                                         | NM_001002267     | 0.509                                              | -0.299                                               | 0.0009                                           | 0.0021                                                                      | 0.2483                                                                        |
| Tmem160            | NA                                                                         | NM_026938        | 0.342                                              | -0.251                                               | 0.0092                                           | 0.0557                                                                      | 0.1168                                                                        |
| Tmem17             | transmembrane<br>protein 17                                                | NM_153596        | 0.423                                              | -0.130                                               | 0.0297                                           | 0.0250                                                                      | 0.5548                                                                        |
| Tmem176a           | NA                                                                         | AK165660         | 0.295                                              | -0.229                                               | 0.0477                                           | 0.1443                                                                      | 0.2108                                                                        |
| Tmem176b           | NA                                                                         | AK156042         | 0.325                                              | -0.140                                               | 0.0004                                           | 0.0029                                                                      | 0.1082                                                                        |
| Tmem180            | NA                                                                         | NM_029186        | 0.303                                              | -0.110                                               | 0.0003                                           | 0.0008                                                                      | 0.2093                                                                        |
| Tmem181            | NA                                                                         | AK137412         | 0.223                                              | -0.357                                               | 0.0163                                           | 0.1676                                                                      | 0.0662                                                                        |
| Tmem24             | transmembrane<br>protein 24                                                | NM_027909        | 0.454                                              | -0.163                                               | 0.0000                                           | 0.0000                                                                      | 0.0002                                                                        |
| Tmem38a            | transmembrane<br>protein 38a                                               | NM_144534        | 0.638                                              | -0.208                                               | 0.0000                                           | 0.0000                                                                      | 0.0018                                                                        |

**Table S1.** Continued.

| <b>Gene Symbol</b> | <b>Gene Name</b>                                              | <b>Entrez ID</b> | <b>Fold Change<br/><i>MECP2</i>-Tg<br/>over WT</b> | <b>Fold Change<br/><i>Mecp2</i>-null<br/>over WT</b> | <b>FDR-<br/>adjusted<br/>p-value<br/>(Total)</b> | <b>FDR-<br/>adjusted<br/>p-value<br/>(<i>MECP2</i>-<br/>Tg over<br/>WT)</b> | <b>FDR-<br/>adjusted<br/>p-value<br/>(<i>Mecp2</i>-<br/>null over<br/>WT)</b> |
|--------------------|---------------------------------------------------------------|------------------|----------------------------------------------------|------------------------------------------------------|--------------------------------------------------|-----------------------------------------------------------------------------|-------------------------------------------------------------------------------|
| Tmem38b            | transmembrane protein 38B                                     | NM_028053        | 0.355                                              | -0.179                                               | 0.0029                                           | 0.0054                                                                      | 0.2977                                                                        |
| Tmem41b            | transmembrane protein 41B                                     | NM_153525        | 0.269                                              | -0.185                                               | 0.0004                                           | 0.0042                                                                      | 0.0645                                                                        |
| Tmem43             | transmembrane protein 43                                      | NM_028766        | 0.469                                              | -0.202                                               | 0.0000                                           | 0.0000                                                                      | 0.0000                                                                        |
| Tmem45a            | transmembrane protein 45a                                     | NM_019631        | 0.532                                              | -0.205                                               | 0.0049                                           | 0.0061                                                                      | 0.3951                                                                        |
| Tmem48             | transmembrane protein 48                                      | NM_028355        | 0.218                                              | -0.202                                               | 0.0000                                           | 0.0046                                                                      | 0.0007                                                                        |
| Tmem55b            | transmembrane protein 55b                                     | AK169026         | 0.499                                              | -0.121                                               | 0.0001                                           | 0.0013                                                                      | 0.0580                                                                        |
| Tmem58             | transmembrane protein 58                                      | AK134719         | 0.232                                              | -0.185                                               | 0.0040                                           | 0.0586                                                                      | 0.0512                                                                        |
| Tmem62             | transmembrane protein 62                                      | NM_010761        | 0.439                                              | -0.310                                               | 0.0000                                           | 0.0000                                                                      | 0.0000                                                                        |
| Tmem67             | transmembrane protein 67                                      | AK077246         | 0.255                                              | -0.229                                               | 0.0000                                           | 0.0000                                                                      | 0.0000                                                                        |
| Tmem74             | NA                                                            | AK045145         | 0.396                                              | -0.418                                               | 0.0315                                           | 0.0720                                                                      | 0.2730                                                                        |
| Tmem80             | NA                                                            | AK049405         | 0.286                                              | -0.211                                               | 0.0108                                           | 0.0751                                                                      | 0.1021                                                                        |
| Tmem85             | NA                                                            | NM_026519        | 0.295                                              | -0.132                                               | 0.0141                                           | 0.0351                                                                      | 0.2531                                                                        |
| Tmem87b            | NA                                                            | AK044356         | 0.283                                              | -0.157                                               | 0.0001                                           | 0.0005                                                                      | 0.1037                                                                        |
| Tmod3              | tropomodulin 3                                                | NM_016963        | 0.308                                              | -0.142                                               | 0.0000                                           | 0.0000                                                                      | 0.0201                                                                        |
| Tmpo               | thymopoietin                                                  | U39073           | 0.307                                              | -0.109                                               | 0.0206                                           | 0.0189                                                                      | 0.5173                                                                        |
| Tmtc4              | NA                                                            | AK036741         | 0.278                                              | -0.342                                               | 0.0000                                           | 0.0002                                                                      | 0.0000                                                                        |
| Tnc                | tenascin C                                                    | NM_011607        | 0.203                                              | -0.209                                               | 0.0000                                           | 0.0039                                                                      | 0.0028                                                                        |
| Tnfrsf1a           | tumor necrosis factor receptor superfamily, member 1a         | AK206708         | 0.277                                              | -0.153                                               | 0.0003                                           | 0.0010                                                                      | 0.1827                                                                        |
| Tnfrsf23           | tumor necrosis factor receptor superfamily, member 23         | NM_024290        | 0.493                                              | -0.331                                               | 0.0011                                           | 0.0028                                                                      | 0.2173                                                                        |
| Tnfrsf8            | tumor necrosis factor receptor superfamily, member 8          | NM_009401        | 0.241                                              | -0.165                                               | 0.0055                                           | 0.0220                                                                      | 0.1663                                                                        |
| Tnfsf5ip1          | tumor necrosis factor superfamily, member 5-induced protein 1 | XM_914945        | 0.363                                              | -0.129                                               | 0.0122                                           | 0.0085                                                                      | 0.5885                                                                        |
| Tnks1bp1           | tankyrase 1 binding protein 1                                 | AK081682         | 0.380                                              | -0.172                                               | 0.0000                                           | 0.0000                                                                      | 0.0013                                                                        |
| Tnnt1              | troponin T1, skeletal, slow                                   | NM_011618        | 0.393                                              | -0.571                                               | 0.0000                                           | 0.1012                                                                      | 0.0002                                                                        |

**Table S1.** Continued.

| <b>Gene Symbol</b> | <b>Gene Name</b>                                      | <b>Entrez ID</b> | <b>Fold Change<br/><i>MECP2</i>-Tg<br/>over WT</b> | <b>Fold Change<br/><i>Mecp2</i>-null<br/>over WT</b> | <b>FDR-<br/>adjusted<br/>p-value<br/>(Total)</b> | <b>FDR-<br/>adjusted<br/>p-value<br/>(<i>MECP2</i>-<br/>Tg over<br/>WT)</b> | <b>FDR-<br/>adjusted<br/>p-value<br/>(<i>Mecp2</i>-<br/>null over<br/>WT)</b> |
|--------------------|-------------------------------------------------------|------------------|----------------------------------------------------|------------------------------------------------------|--------------------------------------------------|-----------------------------------------------------------------------------|-------------------------------------------------------------------------------|
| Tnpo2              | transportin 2<br>(importin 3,<br>karyopherin beta 2b) | AK043707         | 0.317                                              | -0.163                                               | 0.0000                                           | 0.0000                                                                      | 0.0000                                                                        |
| Tnrc5              | trinucleotide repeat<br>containing 5                  | NM_028065        | 0.294                                              | -0.135                                               | 0.0001                                           | 0.0004                                                                      | 0.1048                                                                        |
| Tomm40l            | NA                                                    | NM_001037170     | 0.302                                              | -0.144                                               | 0.0001                                           | 0.0047                                                                      | 0.0215                                                                        |
| Topbp1             | topoisomerase<br>(DNA) II beta<br>binding protein     | AK031389         | 0.317                                              | -0.208                                               | 0.0000                                           | 0.0000                                                                      | 0.0000                                                                        |
| Tor1b              | torsin family 1,<br>member B                          | AK169692         | 0.310                                              | -0.176                                               | 0.0006                                           | 0.0071                                                                      | 0.0619                                                                        |
| Tor2a              | torsin family 2,<br>member A                          | NM_152800        | 0.338                                              | -0.106                                               | 0.0005                                           | 0.0003                                                                      | 0.5654                                                                        |
| Tpd52l2            | tumor protein D52-<br>like 2                          | AK013085         | 0.422                                              | -0.102                                               | 0.0283                                           | 0.0330                                                                      | 0.4486                                                                        |
| Tpm2               | tropomyosin 2, beta                                   | BC014809         | 0.430                                              | -0.536                                               | 0.0000                                           | 0.0009                                                                      | 0.0001                                                                        |
| Tra2a              | NA                                                    | BC058764         | 0.301                                              | -0.194                                               | 0.0007                                           | 0.1100                                                                      | 0.0047                                                                        |
| Tradd              | TNFRSF1A-<br>associated via death<br>domain           | BC028542         | 0.444                                              | -0.438                                               | 0.0000                                           | 0.0010                                                                      | 0.0038                                                                        |
| Traf4              | Tnf receptor<br>associated factor 4                   | AK046015         | 0.344                                              | -0.285                                               | 0.0001                                           | 0.0181                                                                      | 0.0031                                                                        |
| Trappc1            | NA                                                    | BC115818         | 0.417                                              | -0.251                                               | 0.0059                                           | 0.2754                                                                      | 0.0133                                                                        |
| Trhr               | thyrotropin releasing<br>hormone receptor             | NM_013696        | 0.294                                              | -0.651                                               | 0.0035                                           | 0.4188                                                                      | 0.0044                                                                        |
| Trim13             | tripartite motif<br>protein 13                        | NM_023233        | 0.428                                              | -0.272                                               | 0.0202                                           | 0.1406                                                                      | 0.0979                                                                        |
| Trim24             | tripartite motif<br>protein 24                        | NM_145076        | 0.285                                              | -0.333                                               | 0.0000                                           | 0.0003                                                                      | 0.0000                                                                        |
| Trim36             | tripartite motif-<br>containing 36                    | NM_178872        | 0.229                                              | -0.199                                               | 0.0182                                           | 0.1112                                                                      | 0.1132                                                                        |
| Trim39             | tripartite motif<br>protein 39                        | AK166148         | 0.339                                              | -0.163                                               | 0.0430                                           | 0.1316                                                                      | 0.2095                                                                        |
| Trim46             | tripartite motif<br>protein 46                        | NM_183037        | 0.326                                              | -0.188                                               | 0.0000                                           | 0.0000                                                                      | 0.0001                                                                        |
| Trim8              | tripartite motif<br>protein 8                         | NM_053100        | 0.393                                              | -0.210                                               | 0.0000                                           | 0.0000                                                                      | 0.0104                                                                        |
| Trip10             | thyroid hormone<br>receptor interactor 10             | AY081142         | 0.197                                              | -0.218                                               | 0.0025                                           | 0.0460                                                                      | 0.0409                                                                        |
| Trit1              | tRNA<br>isopentenyltransferas<br>e 1                  | NM_025873        | 0.220                                              | -0.184                                               | 0.0211                                           | 0.1144                                                                      | 0.1257                                                                        |
| Trmt1l             | NA                                                    | NM_028604        | 0.298                                              | -0.178                                               | 0.0002                                           | 0.0014                                                                      | 0.0874                                                                        |



**Table S1.** Continued.

| <b>Gene Symbol</b> | <b>Gene Name</b>                                                            | <b>Entrez ID</b> | <b>Fold Change<br/><i>MECP2</i>-Tg<br/>over WT</b> | <b>Fold Change<br/><i>Mecp2</i>-null<br/>over WT</b> | <b>FDR-<br/>adjusted<br/>p-value<br/>(Total)</b> | <b>FDR-<br/>adjusted<br/>p-value<br/>(<i>MECP2</i>-<br/>Tg over<br/>WT)</b> | <b>FDR-<br/>adjusted<br/>p-value<br/>(<i>Mecp2</i>-<br/>null over<br/>WT)</b> |
|--------------------|-----------------------------------------------------------------------------|------------------|----------------------------------------------------|------------------------------------------------------|--------------------------------------------------|-----------------------------------------------------------------------------|-------------------------------------------------------------------------------|
| Trmt12             | tRNA<br>methyltransferase 12<br>homolog (S.<br>cerevisiae)                  | NM_026642        | 0.247                                              | -0.404                                               | 0.0349                                           | 0.5116                                                                      | 0.0373                                                                        |
| Trnt1              | tRNA nucleotidyl<br>transferase, CCA-<br>adding, 1                          | NM_027296        | 0.323                                              | -0.210                                               | 0.0066                                           | 0.0752                                                                      | 0.0641                                                                        |
| Trp53bp1           | transformation<br>related protein 53<br>binding protein 1                   | AK148123         | 0.213                                              | -0.195                                               | 0.0000                                           | 0.0000                                                                      | 0.0000                                                                        |
| Trpc3              | transient receptor<br>potential cation<br>channel, subfamily<br>C, member 3 | NM_019510        | 0.439                                              | -0.203                                               | 0.0000                                           | 0.0000                                                                      | 0.0011                                                                        |
| Trpc6              | transient receptor<br>potential cation<br>channel, subfamily<br>C, member 6 | NM_013838        | 0.313                                              | -0.100                                               | 0.0058                                           | 0.0030                                                                      | 0.6712                                                                        |
| Trpc7              | transient receptor<br>potential cation<br>channel, subfamily<br>C, member 7 | NM_012035        | 0.274                                              | -0.371                                               | 0.0000                                           | 0.0102                                                                      | 0.0017                                                                        |
| Trpv2              | transient receptor<br>potential cation<br>channel, subfamily<br>V, member 2 | NM_011706        | 0.429                                              | -0.360                                               | 0.0000                                           | 0.0000                                                                      | 0.0000                                                                        |
| Tsc22d4            | TSC22 domain<br>family 4                                                    | AK006262         | 0.449                                              | -0.197                                               | 0.0000                                           | 0.0001                                                                      | 0.1246                                                                        |
| Tsga14             | testis specific gene<br>A14                                                 | AK160804         | 0.323                                              | -0.273                                               | 0.0001                                           | 0.0251                                                                      | 0.0036                                                                        |
| Tsga2              | testis specific gene<br>A2                                                  | NM_025290        | 0.426                                              | -0.321                                               | 0.0171                                           | 0.2227                                                                      | 0.0506                                                                        |
| Tspan17            | tetraspanin 17                                                              | NM_028841        | 0.581                                              | -0.385                                               | 0.0000                                           | 0.0001                                                                      | 0.0001                                                                        |
| Tspan4             | tetraspanin 4                                                               | AK051376         | 0.290                                              | -0.298                                               | 0.0000                                           | 0.1128                                                                      | 0.0003                                                                        |
| Tspan6             | tetraspanin 6                                                               | NM_019656        | 0.557                                              | -0.389                                               | 0.0000                                           | 0.0000                                                                      | 0.0000                                                                        |
| Tspyl5             | testis-specific<br>protein, Y-encoded-<br>like 5                            | XM_139378        | 0.450                                              | -0.175                                               | 0.0131                                           | 0.0130                                                                      | 0.4820                                                                        |
| Tssc4              | tumor-suppressing<br>subchromosomal<br>transferable fragment<br>4           | NM_138631        | 0.521                                              | -0.209                                               | 0.0139                                           | 0.0824                                                                      | 0.1181                                                                        |

**Table S1.** Continued.

| <b>Gene Symbol</b> | <b>Gene Name</b>                                                                        | <b>Entrez ID</b> | <b>Fold Change<br/><i>MECP2</i>-Tg<br/>over WT</b> | <b>Fold Change<br/><i>Mecp2</i>-null<br/>over WT</b> | <b>FDR-<br/>adjusted<br/>p-value<br/>(Total)</b> | <b>FDR-<br/>adjusted<br/>p-value<br/>(<i>MECP2</i>-<br/>Tg over<br/>WT)</b> | <b>FDR-<br/>adjusted<br/>p-value<br/>(<i>Mecp2</i>-<br/>null over<br/>WT)</b> |
|--------------------|-----------------------------------------------------------------------------------------|------------------|----------------------------------------------------|------------------------------------------------------|--------------------------------------------------|-----------------------------------------------------------------------------|-------------------------------------------------------------------------------|
| Tst                | thiosulfate<br>sulfurtransferase,<br>mitochondrial                                      | NM_009437        | 0.665                                              | -0.332                                               | 0.0068                                           | 0.0901                                                                      | 0.0549                                                                        |
| Ttc26              | NA                                                                                      | AK035185         | 0.247                                              | -0.376                                               | 0.0000                                           | 0.0133                                                                      | 0.0000                                                                        |
| Ttc27              | NA                                                                                      | AK084905         | 0.323                                              | -0.093                                               | 0.0000                                           | 0.0002                                                                      | 0.1640                                                                        |
| Ttc8               | tetratricopeptide<br>repeat domain 8                                                    | NM_029553        | 0.334                                              | -0.214                                               | 0.0000                                           | 0.0000                                                                      | 0.0016                                                                        |
| Ttll12             | NA                                                                                      | NM_183017        | 0.261                                              | -0.165                                               | 0.0000                                           | 0.0001                                                                      | 0.0103                                                                        |
| Ttpa               | tocopherol (alpha)<br>transfer protein                                                  | BC043705         | 0.375                                              | -0.387                                               | 0.0046                                           | 0.0212                                                                      | 0.1475                                                                        |
| Ttrap              | Traf and Tnf receptor<br>associated protein                                             | AK167707         | 0.260                                              | -0.220                                               | 0.0233                                           | 0.1342                                                                      | 0.1177                                                                        |
| Tubb2b             | NA                                                                                      | NM_023716        | 0.277                                              | -0.217                                               | 0.0084                                           | 0.1632                                                                      | 0.0357                                                                        |
| Tubb2c             | NA                                                                                      | NM_146116        | 0.335                                              | -0.242                                               | 0.0000                                           | 0.0025                                                                      | 0.0062                                                                        |
| Tubb5              | tubulin, beta 5                                                                         | NM_011655        | 0.254                                              | -0.194                                               | 0.0018                                           | 0.1286                                                                      | 0.0102                                                                        |
| Tubd1              | tubulin, delta 1                                                                        | NM_019756        | 0.335                                              | -0.101                                               | 0.0109                                           | 0.0082                                                                      | 0.5637                                                                        |
| Tusc3              | tumor suppressor<br>candidate 3                                                         | NM_030254        | 0.433                                              | -0.061                                               | 0.0305                                           | 0.0264                                                                      | 0.5465                                                                        |
| Txlna              | taxilin alpha                                                                           | NM_001005506     | 0.249                                              | -0.173                                               | 0.0001                                           | 0.0064                                                                      | 0.0136                                                                        |
| Txn1               | thioredoxin 1                                                                           | NM_011660        | 0.647                                              | -0.048                                               | 0.0137                                           | 0.0051                                                                      | 0.8181                                                                        |
| Txndc1             | thioredoxin domain<br>containing 1                                                      | AK137059         | 0.433                                              | -0.199                                               | 0.0000                                           | 0.0000                                                                      | 0.0023                                                                        |
| Txn11              | thioredoxin-like 1                                                                      | NM_016792        | 0.527                                              | -0.155                                               | 0.0000                                           | 0.0002                                                                      | 0.0342                                                                        |
| Txn15              | thioredoxin-like 5                                                                      | BC030344         | 0.506                                              | -0.277                                               | 0.0135                                           | 0.0305                                                                      | 0.2735                                                                        |
| Tyro3              | TYRO3 protein<br>tyrosine kinase 3                                                      | NM_019392        | 0.406                                              | -0.307                                               | 0.0000                                           | 0.0000                                                                      | 0.0000                                                                        |
| Tyrobp             | TYRO protein<br>tyrosine kinase<br>binding protein                                      | NM_011662        | 0.322                                              | -0.387                                               | 0.0028                                           | 0.1518                                                                      | 0.0129                                                                        |
| Tyrp1              | tyrosinase-related<br>protein 1                                                         | NM_031202        | 0.248                                              | -0.354                                               | 0.0158                                           | 0.0768                                                                      | 0.1413                                                                        |
| U2af2              | U2 small nuclear<br>ribonucleoprotein<br>auxiliary factor<br>(U2AF) 2                   | XR_003610        | 0.526                                              | -0.135                                               | 0.0341                                           | 0.0416                                                                      | 0.4396                                                                        |
| Uap111             | UDP-N-<br>actetylglucosamine<br>pyrophosphorylase 1-<br>like 1                          | NM_001033293     | 0.266                                              | -0.139                                               | 0.0000                                           | 0.0009                                                                      | 0.0144                                                                        |
| Ube2a              | ubiquitin-conjugating<br>enzyme E2A, RAD6<br>homolog ( <i>S.</i><br><i>cerevisiae</i> ) | AK163966         | 0.919                                              | -0.263                                               | 0.0000                                           | 0.0010                                                                      | 0.0298                                                                        |

**Table S1.** Continued.

| <b>Gene Symbol</b> | <b>Gene Name</b>                                                  | <b>Entrez ID</b> | <b>Fold Change<br/><i>MECP2</i>-Tg<br/>over WT</b> | <b>Fold Change<br/><i>Mecp2</i>-null<br/>over WT</b> | <b>FDR-<br/>adjusted<br/>p-value<br/>(Total)</b> | <b>FDR-<br/>adjusted<br/>p-value<br/>(<i>MECP2</i>-<br/>Tg over<br/>WT)</b> | <b>FDR-<br/>adjusted<br/>p-value<br/>(<i>Mecp2</i>-<br/>null over<br/>WT)</b> |
|--------------------|-------------------------------------------------------------------|------------------|----------------------------------------------------|------------------------------------------------------|--------------------------------------------------|-----------------------------------------------------------------------------|-------------------------------------------------------------------------------|
| Ube2b              | ubiquitin-conjugating enzyme E2B, RAD6 homology (S. cerevisiae)   | NM_009458        | 0.518                                              | -0.220                                               | 0.0052                                           | 0.0391                                                                      | 0.0950                                                                        |
| Ube2h              | ubiquitin-conjugating enzyme E2H                                  | NM_009459        | 0.181                                              | -0.226                                               | 0.0195                                           | 0.3852                                                                      | 0.0299                                                                        |
| Ubiad1             | UbiA prenyltransferase domain containing 1                        | NM_027873        | 0.379                                              | -0.104                                               | 0.0188                                           | 0.0079                                                                      | 0.7849                                                                        |
| Ubx1               | UBX domain containing 1                                           | NM_024432        | 0.398                                              | -0.053                                               | 0.0092                                           | 0.0057                                                                      | 0.6195                                                                        |
| Ubx4               | UBX domain containing 4                                           | BC004632         | 0.297                                              | -0.280                                               | 0.0295                                           | 0.1729                                                                      | 0.1139                                                                        |
| Ubx5               | UBX domain containing 5                                           | NM_026257        | 0.274                                              | -0.296                                               | 0.0000                                           | 0.0040                                                                      | 0.0004                                                                        |
| Ubx6               | UBX domain containing 6                                           | BC024492         | 0.229                                              | -0.173                                               | 0.0099                                           | 0.1008                                                                      | 0.0701                                                                        |
| Uchl3              | ubiquitin carboxyl-terminal esterase L3 (ubiquitin thiolesterase) | AB033370         | 0.478                                              | -0.159                                               | 0.0302                                           | 0.0811                                                                      | 0.2368                                                                        |
| Uck1               | uridine-cytidine kinase 1-like 1                                  | XM_990895        | 0.261                                              | -0.145                                               | 0.0000                                           | 0.0030                                                                      | 0.0129                                                                        |
| Uevld              | UEV and lactate/malate dehydrogenase domains                      | AK086750         | 0.414                                              | -0.130                                               | 0.0000                                           | 0.0001                                                                      | 0.1081                                                                        |
| Ufc1               | ubiquitin-fold modifier conjugating enzyme 1                      | BC055109         | 0.601                                              | -0.075                                               | 0.0176                                           | 0.0105                                                                      | 0.6537                                                                        |
| Ugp2               | UDP-glucose pyrophosphorylase 2                                   | NM_139297        | 0.366                                              | -0.178                                               | 0.0000                                           | 0.0014                                                                      | 0.0231                                                                        |
| Ulk2               | Unc-51 like kinase 2 (C. elegans)                                 | NM_013881        | 0.271                                              | -0.155                                               | 0.0000                                           | 0.0000                                                                      | 0.0000                                                                        |
| Unc119             | unc-119 homolog (C. elegans)                                      | AF030169         | 0.219                                              | -0.188                                               | 0.0029                                           | 0.1533                                                                      | 0.0131                                                                        |
| Unc13a             | unc-13 homolog A (C. elegans)                                     | AY753536         | 0.322                                              | -0.168                                               | 0.0000                                           | 0.0000                                                                      | 0.0000                                                                        |
| Unc13b             | unc-13 homolog B (C. elegans)                                     | XM_973550        | 0.491                                              | -0.450                                               | 0.0000                                           | 0.0000                                                                      | 0.0000                                                                        |
| Uqcrb              | ubiquinol-cytochrome c reductase binding protein                  | XM_484346        | 0.649                                              | -0.332                                               | 0.0496                                           | 0.1431                                                                      | 0.2207                                                                        |

**Table S1.** Continued.

| <b>Gene Symbol</b> | <b>Gene Name</b>                                                                | <b>Entrez ID</b> | <b>Fold Change<br/><i>MECP2</i>-Tg<br/>over WT</b> | <b>Fold Change<br/><i>Mecp2</i>-null<br/>over WT</b> | <b>FDR-<br/>adjusted<br/>p-value<br/>(Total)</b> | <b>FDR-<br/>adjusted<br/>p-value<br/>(<i>MECP2</i>-<br/>Tg over<br/>WT)</b> | <b>FDR-<br/>adjusted<br/>p-value<br/>(<i>Mecp2</i>-<br/>null over<br/>WT)</b> |
|--------------------|---------------------------------------------------------------------------------|------------------|----------------------------------------------------|------------------------------------------------------|--------------------------------------------------|-----------------------------------------------------------------------------|-------------------------------------------------------------------------------|
| Urm1               | ubiquitin related<br>modifier 1 homolog<br>( <i>S. cerevisiae</i> )             | AK165008         | 0.489                                              | -0.158                                               | 0.0010                                           | 0.0031                                                                      | 0.1854                                                                        |
| Uros               | uroporphyrinogen III<br>synthase                                                | AK135314         | 0.306                                              | -0.184                                               | 0.0001                                           | 0.0046                                                                      | 0.0232                                                                        |
| Uspf1              | upstream<br>transcription factor 1                                              | BC049784         | 0.434                                              | -0.203                                               | 0.0005                                           | 0.0271                                                                      | 0.0154                                                                        |
| Usp16              | ubiquitin specific<br>peptidase 16                                              | NM_024258        | 0.278                                              | -0.226                                               | 0.0000                                           | 0.0035                                                                      | 0.0025                                                                        |
| Usp38              | ubiquitin specific<br>peptidase 38                                              | NM_027554        | 0.332                                              | -0.212                                               | 0.0000                                           | 0.0012                                                                      | 0.0020                                                                        |
| Utp18              | UTP18, small subunit<br>(SSU) processome<br>component, homolog<br>(yeast)       | AK032265         | 0.308                                              | -0.112                                               | 0.0075                                           | 0.0293                                                                      | 0.1715                                                                        |
| Utx                | ubiquitously<br>transcribed<br>tetra-tryptophan<br>repeat gene, X<br>chromosome | AK084039         | 0.277                                              | -0.224                                               | 0.0000                                           | 0.0000                                                                      | 0.0000                                                                        |
| Uxt                | ubiquitously<br>expressed transcript                                            | AK038495         | 0.383                                              | -0.135                                               | 0.0031                                           | 0.0030                                                                      | 0.4533                                                                        |
| V2r5               | vomeroneural 2,<br>receptor 32                                                  | XM_975880        | 0.692                                              | -0.336                                               | 0.0382                                           | 0.0362                                                                      | 0.5210                                                                        |
| Vash2              | vasohibin 2                                                                     | AK078596         | 0.283                                              | -0.264                                               | 0.0008                                           | 0.0719                                                                      | 0.0086                                                                        |
| Vat1               | vesicle amine<br>transport protein 1<br>homolog ( <i>T.<br/>californica</i> )   | BC099678         | 0.271                                              | -0.221                                               | 0.0004                                           | 0.0018                                                                      | 0.1325                                                                        |
| Vbp1               | von Hippel-Lindau<br>binding protein 1                                          | AK167742         | 0.344                                              | -0.297                                               | 0.0006                                           | 0.0354                                                                      | 0.0134                                                                        |
| Vcam1              | vascular cell<br>adhesion molecule 1                                            | AK085320         | 0.337                                              | -0.329                                               | 0.0000                                           | 0.0001                                                                      | 0.0002                                                                        |
| Vdac2              | voltage-dependent<br>anion channel 2                                            | AK159561         | 0.339                                              | -0.095                                               | 0.0001                                           | 0.0001                                                                      | 0.3568                                                                        |
| Vdac3              | voltage-dependent<br>anion channel 3                                            | NM_011696        | 0.478                                              | -0.117                                               | 0.0000                                           | 0.0000                                                                      | 0.0458                                                                        |
| Vgf                | VGF nerve growth<br>factor inducible                                            | NM_001039385     | 0.504                                              | -0.547                                               | 0.0003                                           | 0.0323                                                                      | 0.0076                                                                        |
| Vil1               | villin 1                                                                        | XM_992366        | 0.324                                              | -0.258                                               | 0.0000                                           | 0.0008                                                                      | 0.0383                                                                        |
| Vps54              | vacuolar protein<br>sorting 54 (yeast)                                          | AK032728         | 0.297                                              | -0.178                                               | 0.0000                                           | 0.0002                                                                      | 0.0024                                                                        |

**Table S1.** Continued.

| <b>Gene Symbol</b> | <b>Gene Name</b>                                                        | <b>Entrez ID</b> | <b>Fold Change<br/><i>MECP2</i>-Tg<br/>over WT</b> | <b>Fold Change<br/><i>Mecp2</i>-null<br/>over WT</b> | <b>FDR-<br/>adjusted<br/>p-value<br/>(Total)</b> | <b>FDR-<br/>adjusted<br/>p-value<br/>(<i>MECP2</i>-<br/>Tg over<br/>WT)</b> | <b>FDR-<br/>adjusted<br/>p-value<br/>(<i>Mecp2</i>-<br/>null over<br/>WT)</b> |
|--------------------|-------------------------------------------------------------------------|------------------|----------------------------------------------------|------------------------------------------------------|--------------------------------------------------|-----------------------------------------------------------------------------|-------------------------------------------------------------------------------|
| Vstm2              | V-set and<br>transmembrane<br>domain containing2A                       | AK134954         | 0.051                                              | -0.505                                               | 0.0000                                           | 0.7359                                                                      | 0.0000                                                                        |
| Vti1b              | vesicle transport<br>through interaction<br>with t-SNAREs 1B<br>homolog | NM_016800        | 0.381                                              | -0.150                                               | 0.0001                                           | 0.0011                                                                      | 0.0776                                                                        |
| Vwa1               | von Willebrand<br>factor A domain<br>containing 1                       | NM_147776        | 0.363                                              | -0.204                                               | 0.0010                                           | 0.0302                                                                      | 0.0254                                                                        |
| Wbp1               | WW domain binding<br>protein 1                                          | AK184383         | 0.313                                              | -0.205                                               | 0.0000                                           | 0.0006                                                                      | 0.0035                                                                        |
| Wbp5               | WW domain binding<br>protein 5                                          | U92454           | 0.651                                              | -0.316                                               | 0.0267                                           | 0.1636                                                                      | 0.1098                                                                        |
| Wbscr27            | Williams Beuren<br>syndrome<br>chromosome region<br>27 (human)          | NM_024479        | 0.416                                              | -0.467                                               | 0.0000                                           | 0.0003                                                                      | 0.0000                                                                        |
| Wdr1               | WD repeat domain 1                                                      | NM_011715        | 0.297                                              | -0.153                                               | 0.0000                                           | 0.0000                                                                      | 0.0000                                                                        |
| Wdr12              | WD repeat domain12                                                      | XM_981875        | 0.330                                              | -0.122                                               | 0.0000                                           | 0.0000                                                                      | 0.2069                                                                        |
| Wdr17              | WD repeat domain17                                                      | AK044241         | 0.179                                              | -0.382                                               | 0.0000                                           | 0.0037                                                                      | 0.0000                                                                        |
| Wdr24              | WD repeat domain24                                                      | NM_173741        | 0.532                                              | -0.104                                               | 0.0092                                           | 0.0084                                                                      | 0.4938                                                                        |
| Wdr26              | WD repeat domain26                                                      | XM_977731        | 0.337                                              | -0.112                                               | 0.0000                                           | 0.0000                                                                      | 0.0066                                                                        |
| Wdr32              | WD repeat domain32                                                      | AK165246         | 0.349                                              | -0.088                                               | 0.0002                                           | 0.0002                                                                      | 0.3983                                                                        |
| Wdr44              | WD repeat domain44                                                      | AK043684         | 0.159                                              | -0.279                                               | 0.0002                                           | 0.1687                                                                      | 0.0008                                                                        |
| Wdr5               | WD repeat domain 5                                                      | NM_080848        | 0.615                                              | -0.132                                               | 0.0000                                           | 0.0000                                                                      | 0.1460                                                                        |
| Wdr53              | WD repeat domain53                                                      | NM_026898        | 0.320                                              | -0.365                                               | 0.0037                                           | 0.0714                                                                      | 0.0391                                                                        |
| Wdr54              | WD repeat domain54                                                      | BC083332         | 0.329                                              | -0.144                                               | 0.0000                                           | 0.0000                                                                      | 0.0304                                                                        |
| Wdr61              | WD repeat domain61                                                      | NM_023191        | 0.298                                              | -0.159                                               | 0.0200                                           | 0.0917                                                                      | 0.1475                                                                        |
| Wdr77              | WD repeat domain77                                                      | AK078856         | 0.294                                              | -0.123                                               | 0.0000                                           | 0.0001                                                                      | 0.1195                                                                        |
| Wdr78              | WD repeat domain 8                                                      | AK030997         | 0.319                                              | -0.435                                               | 0.0000                                           | 0.0003                                                                      | 0.0000                                                                        |
| Whsc1              | Wolf-Hirschhorn<br>syndrome candidate 1<br>(human)                      | XM_898331        | 0.213                                              | -0.200                                               | 0.0000                                           | 0.0012                                                                      | 0.0000                                                                        |
| Wnt5a              | wingless-related<br>MMTV integration<br>site 5A                         | AK032977         | 0.349                                              | -0.236                                               | 0.0087                                           | 0.1383                                                                      | 0.0445                                                                        |
| Wnt7b              | wingless-related<br>MMTV integration<br>site 7B                         | NM_009528        | 0.316                                              | -0.089                                               | 0.0106                                           | 0.0072                                                                      | 0.5941                                                                        |
| Xpo1               | exportin 1, CRM1<br>homolog (yeast)                                     | NM_001035226     | 0.524                                              | -0.222                                               | 0.0000                                           | 0.0000                                                                      | 0.0005                                                                        |

**Table S1.** Continued.

| <b>Gene Symbol</b> | <b>Gene Name</b>                                                   | <b>Entrez ID</b> | <b>Fold Change<br/><i>MECP2</i>-Tg<br/>over WT</b> | <b>Fold Change<br/><i>Mecp2</i>-null<br/>over WT</b> | <b>FDR-<br/>adjusted<br/>p-value<br/>(Total)</b> | <b>FDR-<br/>adjusted<br/>p-value<br/>(<i>MECP2</i>-<br/>Tg over<br/>WT)</b> | <b>FDR-<br/>adjusted<br/>p-value<br/>(<i>Mecp2</i>-<br/>null over<br/>WT)</b> |
|--------------------|--------------------------------------------------------------------|------------------|----------------------------------------------------|------------------------------------------------------|--------------------------------------------------|-----------------------------------------------------------------------------|-------------------------------------------------------------------------------|
| Xtrp3s1            | solute carrier family 6 (neurotransmitter transporter), member 20A | NM_139142        | 0.441                                              | -0.032                                               | 0.0000                                           | 0.0000                                                                      | 0.7519                                                                        |
| Yars2              | tyrosyl-tRNA synthetase 2 (mitochondrial)                          | AK083653         | 0.254                                              | -0.370                                               | 0.0018                                           | 0.1146                                                                      | 0.0113                                                                        |
| Yeats4             | YEATS domain containing 4                                          | NM_026570        | 0.318                                              | -0.282                                               | 0.0000                                           | 0.0003                                                                      | 0.0025                                                                        |
| Yes1               | Yamaguchi sarcoma viral (v-yes) oncogene homolog 1                 | AK051466         | 0.177                                              | -0.304                                               | 0.0000                                           | 0.0844                                                                      | 0.0001                                                                        |
| Yif1a              | Yip1 interacting factor homolog A ( <i>S. cerevisiae</i> )         | NM_026553        | 0.559                                              | -0.221                                               | 0.0001                                           | 0.0006                                                                      | 0.0842                                                                        |
| Yipf2              | Yip1 domain family, member 2                                       | NM_138303        | 0.311                                              | -0.133                                               | 0.0003                                           | 0.0009                                                                      | 0.2297                                                                        |
| Yipf3              | Yip1 domain family, member 3                                       | AK042644         | 0.407                                              | -0.059                                               | 0.0001                                           | 0.0001                                                                      | 0.4387                                                                        |
| Ykt6               | YKT6 homolog ( <i>S. Cerevisiae</i> )                              | NM_019661        | 0.266                                              | -0.166                                               | 0.0006                                           | 0.0315                                                                      | 0.0168                                                                        |
| Ypel3              | yippee-like 3 ( <i>Drosophila</i> )                                | NM_026875        | 0.513                                              | -0.100                                               | 0.0000                                           | 0.0000                                                                      | 0.5778                                                                        |
| Ypel4              | yippee-like 4 ( <i>Drosophila</i> )                                | AK043577         | 0.220                                              | -0.213                                               | 0.0000                                           | 0.0212                                                                      | 0.0013                                                                        |
| Zbtb26             | zinc finger and BTB domain containing 26                           | NM_199025        | 0.458                                              | -0.357                                               | 0.0111                                           | 0.0300                                                                      | 0.2334                                                                        |
| Zbtb7b             | zinc finger and BTB domain containing 7B                           | XM_989013        | 0.373                                              | -0.192                                               | 0.0001                                           | 0.0042                                                                      | 0.0253                                                                        |
| Zc3h8              | zinc finger CCCH type containing 8                                 | AK132679         | 0.425                                              | -0.207                                               | 0.0177                                           | 0.0391                                                                      | 0.2772                                                                        |
| Zcchc12            | zinc finger, CCHC domain containing 12                             | NM_028325        | 0.385                                              | -0.174                                               | 0.0071                                           | 0.0102                                                                      | 0.3657                                                                        |
| Zcchc9             | zinc finger, CCHC domain containing 9                              | NM_145453        | 0.365                                              | -0.228                                               | 0.0012                                           | 0.0338                                                                      | 0.0277                                                                        |
| Zcwpw1             | zinc finger, CW type with PWWP domain 1                            | NM_001005426     | 0.488                                              | -0.260                                               | 0.0000                                           | 0.0000                                                                      | 0.0017                                                                        |
| Zdhhc12            | zinc finger, DHHC domain containing 12                             | NM_001037762     | 0.217                                              | -0.215                                               | 0.0245                                           | 0.1295                                                                      | 0.1277                                                                        |
| Zdhhc13            | zinc finger, DHHC domain containing 13                             | NM_028031        | 0.344                                              | -0.075                                               | 0.0000                                           | 0.0000                                                                      | 0.2905                                                                        |
| Zdhhc15            | zinc finger, DHHC domain containing 15                             | NM_175358        | 0.509                                              | -0.475                                               | 0.0000                                           | 0.0000                                                                      | 0.0000                                                                        |

**Table S1.** Continued.

| <b>Gene Symbol</b> | <b>Gene Name</b>                       | <b>Entrez ID</b> | <b>Fold Change<br/><i>MECP2</i>-Tg<br/>over WT</b> | <b>Fold Change<br/><i>Mecp2</i>-null<br/>over WT</b> | <b>FDR-<br/>adjusted<br/>p-value<br/>(Total)</b> | <b>FDR-<br/>adjusted<br/>p-value<br/>(<i>MECP2</i>-<br/>Tg over<br/>WT)</b> | <b>FDR-<br/>adjusted<br/>p-value<br/>(<i>Mecp2</i>-<br/>null over<br/>WT)</b> |
|--------------------|----------------------------------------|------------------|----------------------------------------------------|------------------------------------------------------|--------------------------------------------------|-----------------------------------------------------------------------------|-------------------------------------------------------------------------------|
| Zdhhc2             | zinc finger, DHHC domain containing 2  | AK044652         | 0.437                                              | -0.250                                               | 0.0000                                           | 0.0000                                                                      | 0.0010                                                                        |
| Zdhhc20            | zinc finger, DHHC domain containing 20 | NM_029492        | 0.266                                              | -0.255                                               | 0.0000                                           | 0.0000                                                                      | 0.0000                                                                        |
| Zdhhc22            | zinc finger, DHHC-type containing 22   | AK080584         | 0.238                                              | -0.323                                               | 0.0012                                           | 0.2777                                                                      | 0.0026                                                                        |
| Zdhhc3             | zinc finger, DHHC domain containing 3  | NM_026917        | 0.308                                              | -0.106                                               | 0.0000                                           | 0.0000                                                                      | 0.3068                                                                        |
| Zdhhc6             | zinc finger, DHHC domain containing 6  | AK168497         | 0.342                                              | -0.169                                               | 0.0006                                           | 0.0068                                                                      | 0.0694                                                                        |
| Zdhhc7             | zinc finger, DHHC domain containing 7  | AK089681         | 0.470                                              | -0.111                                               | 0.0001                                           | 0.0001                                                                      | 0.5891                                                                        |
| Zfp110             | zinc finger protein 110                | NM_022981        | 0.274                                              | -0.169                                               | 0.0140                                           | 0.0226                                                                      | 0.3497                                                                        |
| Zfp120             | zinc finger protein 120                | NM_181266        | 0.534                                              | -0.261                                               | 0.0013                                           | 0.0172                                                                      | 0.0579                                                                        |
| Zfp125             | zinc finger protein 125                | AJ005350         | 0.553                                              | -0.378                                               | 0.0086                                           | 0.1408                                                                      | 0.0433                                                                        |
| Zfp191             | zinc finger protein 191                | XM_975695        | 0.324                                              | -0.154                                               | 0.0235                                           | 0.0828                                                                      | 0.1879                                                                        |
| Zfp219             | zinc finger protein 219                | BC052050         | 0.439                                              | -0.187                                               | 0.0000                                           | 0.0001                                                                      | 0.0995                                                                        |
| Zfp259             | zinc finger protein 259                | AK168061         | 0.385                                              | -0.033                                               | 0.0002                                           | 0.0000                                                                      | 0.7824                                                                        |
| Zfp263             | zinc finger protein 263                | AK182706         | 0.515                                              | -0.220                                               | 0.0001                                           | 0.0020                                                                      | 0.0442                                                                        |
| Zfp313             | zinc finger protein 313                | NM_030743        | 0.350                                              | -0.138                                               | 0.0000                                           | 0.0002                                                                      | 0.0311                                                                        |
| Zfp322a            | zinc finger protein 322a               | NM_172586        | 0.273                                              | -0.409                                               | 0.0035                                           | 0.2359                                                                      | 0.0093                                                                        |
| Zfp330             | zinc finger protein 330                | AK037748         | 0.302                                              | -0.118                                               | 0.0050                                           | 0.0124                                                                      | 0.2405                                                                        |
| Zfp369             | zinc finger protein 369                | NM_178364        | 0.242                                              | -0.213                                               | 0.0012                                           | 0.0931                                                                      | 0.0099                                                                        |
| Zfp37              | zinc finger protein 37                 | AK043700         | 0.498                                              | -0.328                                               | 0.0235                                           | 0.1821                                                                      | 0.0869                                                                        |
| Zfp397             | zinc finger protein 397                | NM_027007        | 0.224                                              | -0.252                                               | 0.0118                                           | 0.1664                                                                      | 0.0486                                                                        |
| Zfp40              | zinc finger protein 40                 | NM_009555        | 0.291                                              | -0.430                                               | 0.0000                                           | 0.0778                                                                      | 0.0000                                                                        |
| Zfp444             | zinc finger protein 444                | AK012846         | 0.332                                              | -0.106                                               | 0.0085                                           | 0.0078                                                                      | 0.4921                                                                        |
| Zfp446             | zinc finger protein 446                | AK044666         | 0.232                                              | -0.172                                               | 0.0130                                           | 0.1107                                                                      | 0.0827                                                                        |
| Zfp518             | zinc finger protein 518                | XM_976746        | 0.205                                              | -0.225                                               | 0.0393                                           | 0.2181                                                                      | 0.1172                                                                        |

**Table S1.** Continued.

| <b>Gene Symbol</b> | <b>Gene Name</b>                                                              | <b>Entrez ID</b> | <b>Fold Change<br/><i>MECP2</i>-Tg<br/>over WT</b> | <b>Fold Change<br/><i>Mecp2</i>-null<br/>over WT</b> | <b>FDR-<br/>adjusted<br/>p-value<br/>(Total)</b> | <b>FDR-<br/>adjusted<br/>p-value<br/>(<i>MECP2</i>-<br/>Tg over<br/>WT)</b> | <b>FDR-<br/>adjusted<br/>p-value<br/>(<i>Mecp2</i>-<br/>null over<br/>WT)</b> |
|--------------------|-------------------------------------------------------------------------------|------------------|----------------------------------------------------|------------------------------------------------------|--------------------------------------------------|-----------------------------------------------------------------------------|-------------------------------------------------------------------------------|
| Zfp52              | zinc finger protein 52                                                        | NM_144515        | 0.598                                              | -0.582                                               | 0.0000                                           | 0.0075                                                                      | 0.0001                                                                        |
| Zfp54              | zinc finger protein 54                                                        | NM_011760        | 0.370                                              | -0.494                                               | 0.0001                                           | 0.0201                                                                      | 0.0042                                                                        |
| Zfp57              | zinc finger protein 57                                                        | NM_009559        | 0.698                                              | -0.769                                               | 0.0000                                           | 0.0000                                                                      | 0.0001                                                                        |
| Zfp598             | zinc finger protein<br>598                                                    | AK138860         | 0.296                                              | -0.156                                               | 0.0000                                           | 0.0010                                                                      | 0.0086                                                                        |
| Zfp617             | zinc finger protein<br>617                                                    | AK143880         | 0.084                                              | -0.453                                               | 0.0264                                           | 0.8119                                                                      | 0.0132                                                                        |
| Zfp711             | zinc finger protein<br>711                                                    | XM_898101        | 0.216                                              | -0.352                                               | 0.0244                                           | 0.2579                                                                      | 0.0612                                                                        |
| Zfp715             | zinc finger protein<br>715                                                    | AK011730         | 0.240                                              | -0.208                                               | 0.0024                                           | 0.0185                                                                      | 0.0933                                                                        |
| Zfp748             | zinc finger protein<br>748                                                    | NM_001035231     | 0.252                                              | -0.469                                               | 0.0484                                           | 0.5713                                                                      | 0.0448                                                                        |
| Zfp758             | zinc finger protein<br>758                                                    | NM_145484        | 0.428                                              | -0.252                                               | 0.0000                                           | 0.0004                                                                      | 0.0079                                                                        |
| Zfp760             | zinc finger protein<br>760                                                    | NM_001008501     | 0.327                                              | -0.197                                               | 0.0076                                           | 0.0204                                                                      | 0.2334                                                                        |
| Zfp82              | zinc finger protein 82                                                        | XM_001002250     | 0.272                                              | -0.198                                               | 0.0462                                           | 0.0647                                                                      | 0.4026                                                                        |
| Zfp92              | zinc finger protein 92                                                        | NM_009566        | 0.310                                              | -0.290                                               | 0.0222                                           | 0.0522                                                                      | 0.2678                                                                        |
| Zfyve1             | zinc finger, FYVE<br>domain containing 1                                      | NM_183154        | 0.371                                              | -0.079                                               | 0.0000                                           | 0.0000                                                                      | 0.2064                                                                        |
| Zfyve16            | zinc finger, FYVE<br>domain containing 16                                     | AK080779         | 0.113                                              | -0.299                                               | 0.0001                                           | 0.2882                                                                      | 0.0001                                                                        |
| Zik1               | zinc finger protein<br>interacting with K<br>protein 1                        | NM_009577        | 0.566                                              | -0.374                                               | 0.0001                                           | 0.0011                                                                      | 0.0424                                                                        |
| Zmat2              | zinc finger, matrin<br>type 2                                                 | NM_025594        | 0.338                                              | -0.105                                               | 0.0306                                           | 0.0655                                                                      | 0.2888                                                                        |
| Zmpste24           | zinc<br>metallopeptidase,<br>STE24 homolog ( <i>S.</i><br><i>cerevisiae</i> ) | NM_172700        | 0.285                                              | -0.225                                               | 0.0000                                           | 0.0214                                                                      | 0.0016                                                                        |
| Zmym1              | zinc finger, MYM<br>domain containing 1                                       | AK132399         | 0.375                                              | -0.185                                               | 0.0003                                           | 0.0010                                                                      | 0.1846                                                                        |
| Zmym3              | zinc finger, MYM-<br>type 3                                                   | AK082075         | 0.292                                              | -0.193                                               | 0.0000                                           | 0.0000                                                                      | 0.0000                                                                        |
| Zmynd19            | zinc finger, MYND<br>domain containing 19                                     | XM_987306        | 0.340                                              | -0.160                                               | 0.0120                                           | 0.0673                                                                      | 0.1243                                                                        |
| Znrf4              | zinc and ring finger 4                                                        | AK007069         | 0.652                                              | -0.507                                               | 0.0496                                           | 0.0465                                                                      | 0.5356                                                                        |
| Zpbp               | zona pellucida<br>binding protein                                             | NM_015785        | 0.343                                              | -0.126                                               | 0.0169                                           | 0.0194                                                                      | 0.4418                                                                        |
| Zscan21            | zinc finger SCAN<br>domain containing 21                                      | NM_001044704     | 0.317                                              | -0.114                                               | 0.0451                                           | 0.0403                                                                      | 0.5462                                                                        |



**Table S2.** The list of genes that are repressed by MeCP2 (FDR-adjusted p-value < 0.05).

| <b>Gene Symbol</b> | <b>Gene Name</b>              | <b>Entrez ID</b> | <b>Fold Change<br/><i>MECP2</i>-<br/>Tg over<br/>WT</b> | <b>Fold Change<br/><i>Mecp2</i>-<br/>null over<br/>WT</b> | <b>FDR-<br/>adjusted<br/>p-value<br/>(Total)</b> | <b>FDR-<br/>adjusted<br/>p-value<br/>(<i>MECP2</i>-<br/>Tg over<br/>WT)</b> | <b>FDR-<br/>adjusted<br/>p-value<br/>(<i>Mecp2</i>-<br/>null over<br/>WT)</b> |
|--------------------|-------------------------------|------------------|---------------------------------------------------------|-----------------------------------------------------------|--------------------------------------------------|-----------------------------------------------------------------------------|-------------------------------------------------------------------------------|
| 1200009I06Rik      | RIKEN cDNA<br>1200009I06 gene | NM_028807        | -0.390                                                  | 0.063                                                     | 0.0004                                           | 0.0002                                                                      | 0.6948                                                                        |
| 1600021P15Rik      | NA                            | NM_177718        | -0.331                                                  | 0.190                                                     | 0.0195                                           | 0.0695                                                                      | 0.1856                                                                        |
| 1700006F04Rik      | RIKEN cDNA<br>1700006F04 gene | AK005671         | -0.696                                                  | 0.526                                                     | 0.0067                                           | 0.1291                                                                      | 0.0373                                                                        |
| 1700018C11Rik      | RIKEN cDNA<br>1700018C11 gene | NM_029324        | -0.603                                                  | 0.127                                                     | 0.0033                                           | 0.0015                                                                      | 0.7070                                                                        |
| 1700030F04Rik      | NA                            | AK006540         | -0.755                                                  | 0.334                                                     | 0.0028                                           | 0.0065                                                                      | 0.2434                                                                        |
| 1810015C04Rik      | RIKEN cDNA<br>1810015C04 gene | AK007506         | -0.303                                                  | 0.105                                                     | 0.0058                                           | 0.0064                                                                      | 0.4320                                                                        |
| 2010300C02Rik      | RIKEN cDNA<br>2010300C02 gene | XM_916039        | -0.398                                                  | 0.490                                                     | 0.0103                                           | 0.0046                                                                      | 0.7474                                                                        |
| 2210019I11Rik      | RIKEN cDNA<br>2210019I11 gene | AK133519         | -0.339                                                  | 0.233                                                     | 0.0177                                           | 0.0094                                                                      | 0.6921                                                                        |
| 2310005E17Rik      | RIKEN cDNA<br>2310005E17 gene | AK009168         | -0.513                                                  | 0.100                                                     | 0.0464                                           | 0.0168                                                                      | 0.8876                                                                        |
| 2410066E13Rik      | RIKEN cDNA<br>2410066E13 gene | NM_026629        | -0.360                                                  | 0.180                                                     | 0.0247                                           | 0.0585                                                                      | 0.2647                                                                        |
| 2700071J12Rik      | NA                            | AK012511         | -0.593                                                  | 0.856                                                     | 0.0219                                           | 0.2643                                                                      | 0.0533                                                                        |
| 2810473G09Rik      | NA                            | AK170452         | -0.475                                                  | 0.100                                                     | 0.0022                                           | 0.0014                                                                      | 0.5715                                                                        |
| 2900056L01Rik      | RIKEN cDNA<br>2900056L01 gene | AK013704         | -0.604                                                  | 0.065                                                     | 0.0305                                           | 0.0103                                                                      | 0.8868                                                                        |
| 4930403O15Rik      | RIKEN cDNA<br>4930403O15 gene | AK015069         | -0.334                                                  | 0.361                                                     | 0.0039                                           | 0.3441                                                                      | 0.0065                                                                        |
| 4930404K13Rik      | NA                            | AK015085         | -0.833                                                  | 0.588                                                     | 0.0027                                           | 0.0423                                                                      | 0.0482                                                                        |
| 4930443B20Rik      | RIKEN cDNA<br>4930443B20 gene | AK015368         | -0.408                                                  | 0.342                                                     | 0.0346                                           | 0.0275                                                                      | 0.5799                                                                        |
| 4930487H11Rik      | NA                            | AK015638         | -0.152                                                  | 0.701                                                     | 0.0261                                           | 0.7382                                                                      | 0.0155                                                                        |
| 4930519N16Rik      | RIKEN cDNA<br>4930519N16 gene | BC016199         | -0.284                                                  | 0.325                                                     | 0.0396                                           | 0.1806                                                                      | 0.1435                                                                        |
| 4930563M20Rik      | NA                            | AK019781         | -0.762                                                  | 1.063                                                     | 0.0443                                           | 0.1405                                                                      | 0.2027                                                                        |
| 4933432G23Rik      | NA                            | AK017021         | -0.352                                                  | 0.331                                                     | 0.0065                                           | 0.2655                                                                      | 0.0156                                                                        |
| 5033415L01Rik      | NA                            | AK017175         | -1.213                                                  | 0.117                                                     | 0.0434                                           | 0.0149                                                                      | 0.9043                                                                        |
| 5830408B19Rik      | RIKEN cDNA<br>5830408B19 gene | AK017909         | -0.257                                                  | 0.196                                                     | 0.0207                                           | 0.1367                                                                      | 0.1036                                                                        |
| 5830408C22Rik      | RIKEN cDNA<br>5830408C22 gene | AK037533         | -0.275                                                  | 0.284                                                     | 0.0038                                           | 0.0321                                                                      | 0.0860                                                                        |

**Table S2.** Continued.

| <b>Gene Symbol</b> | <b>Gene Name</b>                                                    | <b>Entrez ID</b> | <b>Fold Change<br/><i>MECP2</i>-<br/>Tg over<br/>WT</b> | <b>Fold Change<br/><i>Mecp2</i>-<br/>null over<br/>WT</b> | <b>FDR-<br/>adjusted<br/>p-value<br/>(Total)</b> | <b>FDR-<br/>adjusted<br/>p-value<br/>(<i>MECP2</i>-<br/>Tg over<br/>WT)</b> | <b>FDR-<br/>adjusted<br/>p-value<br/>(<i>Mecp2</i>-<br/>null over<br/>WT)</b> |
|--------------------|---------------------------------------------------------------------|------------------|---------------------------------------------------------|-----------------------------------------------------------|--------------------------------------------------|-----------------------------------------------------------------------------|-------------------------------------------------------------------------------|
| 9430013L17Rik      | RIKEN cDNA<br>9430013L17 gene                                       | AK020414         | -0.084                                                  | 0.351                                                     | 0.0122                                           | 0.8621                                                                      | 0.0052                                                                        |
| A2bp1              | NA                                                                  | AK158194         | -0.225                                                  | 0.289                                                     | 0.0000                                           | 0.0000                                                                      | 0.0000                                                                        |
| A430090L17Rik      | RIKEN cDNA<br>A430090L17 gene                                       | XM_977267        | -0.330                                                  | 0.271                                                     | 0.0112                                           | 0.0728                                                                      | 0.1094                                                                        |
| A530065N20         | NA                                                                  | AK080130         | -0.376                                                  | 0.333                                                     | 0.0494                                           | 0.1165                                                                      | 0.2665                                                                        |
| A730017D01Rik      | RIKEN cDNA<br>A730017D01 gene                                       | AK031243         | -0.557                                                  | 0.392                                                     | 0.0439                                           | 0.1016                                                                      | 0.2715                                                                        |
| A730054J21Rik      | RIKEN cDNA<br>A730054J21 gene                                       | BC023483         | -0.369                                                  | 0.242                                                     | 0.0069                                           | 0.1836                                                                      | 0.0257                                                                        |
| AB112350           | cDNA sequence<br>AB112350                                           | NM_178728        | -0.448                                                  | 0.072                                                     | 0.0017                                           | 0.0019                                                                      | 0.4105                                                                        |
| Acbd7              | NA                                                                  | XM_990697        | -0.066                                                  | 0.418                                                     | 0.0311                                           | 0.7978                                                                      | 0.0164                                                                        |
| Accn1              | amiloride-sensitive<br>cation channel 1,<br>neuronal<br>(degenerin) | NM_007384        | -0.213                                                  | 0.308                                                     | 0.0000                                           | 0.0042                                                                      | 0.0000                                                                        |
| Adam2              | a disintegrin and<br>metallopeptidase<br>domain 2                   | AK161261         | -0.258                                                  | 0.219                                                     | 0.0071                                           | 0.0252                                                                      | 0.1846                                                                        |
| Adamts11           | ADAMTS-like 1                                                       | AK045085         | -0.327                                                  | 0.166                                                     | 0.0000                                           | 0.0000                                                                      | 0.0249                                                                        |
| Adarb1             | adenosine<br>deaminase, RNA-<br>specific, B1                        | NM_001024<br>838 | -0.256                                                  | 0.150                                                     | 0.0000                                           | 0.0000                                                                      | 0.0013                                                                        |
| Adarb2             | adenosine<br>deaminase, RNA-<br>specific, B2                        | AK051460         | -0.420                                                  | 0.103                                                     | 0.0000                                           | 0.0000                                                                      | 0.1775                                                                        |
| Aff1               | AF4/FMR2 family,<br>member 1                                        | AK082878         | -0.140                                                  | 0.359                                                     | 0.0000                                           | 0.1616                                                                      | 0.0000                                                                        |
| Aff3               | AF4/FMR2 family,<br>member 3                                        | AK014322         | -0.283                                                  | 0.133                                                     | 0.0077                                           | 0.0464                                                                      | 0.1187                                                                        |
| Agc1               | aggrecan 1                                                          | NM_007424        | -0.319                                                  | 0.103                                                     | 0.0044                                           | 0.0030                                                                      | 0.5778                                                                        |
| Agxt211            | alanine-glyoxylate<br>aminotransferase 2-<br>like 1                 | NM_027907        | -0.552                                                  | 0.055                                                     | 0.0000                                           | 0.0000                                                                      | 0.5312                                                                        |
| AI851790           | expressed sequence<br>AI851790                                      | NM_182807        | -0.169                                                  | 0.301                                                     | 0.0000                                           | 0.1037                                                                      | 0.0000                                                                        |
| AI875142           | NA                                                                  | AK079091         | -0.331                                                  | 0.528                                                     | 0.0187                                           | 0.0371                                                                      | 0.3033                                                                        |
| Akap13             | A kinase (PRKA)<br>anchor protein 13                                | XM_979405        | -0.228                                                  | 0.219                                                     | 0.0124                                           | 0.2824                                                                      | 0.0280                                                                        |
| Akr1c6             | aldo-keto reductase<br>family 1,member C6                           | NM_054080        | -0.415                                                  | 0.312                                                     | 0.0126                                           | 0.0246                                                                      | 0.3037                                                                        |

**Table S2.** Continued.

| <b>Gene Symbol</b> | <b>Gene Name</b>                                                                   | <b>Entrez ID</b> | <b>Fold Change<br/><i>MECP2</i>-<br/>Tg over<br/>WT</b> | <b>Fold Change<br/><i>Mecp2</i>-<br/>null over<br/>WT</b> | <b>FDR-<br/>adjusted<br/>p-value<br/>(Total)</b> | <b>FDR-<br/>adjusted<br/>p-value<br/>(<i>MECP2</i>-<br/>Tg over<br/>WT)</b> | <b>FDR-<br/>adjusted<br/>p-value<br/>(<i>Mecp2</i>-<br/>null over<br/>WT)</b> |
|--------------------|------------------------------------------------------------------------------------|------------------|---------------------------------------------------------|-----------------------------------------------------------|--------------------------------------------------|-----------------------------------------------------------------------------|-------------------------------------------------------------------------------|
| Aqp7               | aquaporin 7                                                                        | NM_007473        | -0.286                                                  | 0.122                                                     | 0.0344                                           | 0.0365                                                                      | 0.4813                                                                        |
| Arhgap10           | Rho GTPase<br>activating protein 10                                                | AF297030         | -0.183                                                  | 0.336                                                     | 0.0000                                           | 0.0776                                                                      | 0.0000                                                                        |
| Arhgap26           | Rho GTPase<br>activating protein 26                                                | NM_175164        | -0.284                                                  | 0.172                                                     | 0.0000                                           | 0.0000                                                                      | 0.0000                                                                        |
| Arhgef3            | Rho guanine<br>nucleotide exchange<br>factor (GEF) 3                               | NM_027871        | -0.257                                                  | 0.146                                                     | 0.0028                                           | 0.0293                                                                      | 0.0715                                                                        |
| Asah2              | N-acylsphingosine<br>amidohydrolase 2                                              | AK046540         | -0.362                                                  | 0.044                                                     | 0.0000                                           | 0.0000                                                                      | 0.6104                                                                        |
| Atp1b4             | ATPase, (Na <sup>+</sup> )/K <sup>+</sup><br>transporting, beta 4<br>polypeptide   | NM_133690        | -0.380                                                  | 0.165                                                     | 0.0212                                           | 0.0184                                                                      | 0.5372                                                                        |
| Atp8a2             | ATPase,<br>aminophospholipid<br>transporter-like,<br>class I, type 8A,<br>member 2 | NM_015803        | -0.277                                                  | 0.140                                                     | 0.0000                                           | 0.0000                                                                      | 0.0000                                                                        |
| Atxn7l4            | ataxin 7-like 4                                                                    | NM_028139        | -0.471                                                  | 0.205                                                     | 0.0010                                           | 0.0150                                                                      | 0.0500                                                                        |
| Auts2              | autism susceptibility<br>candidate 2                                               | AK038536         | -0.211                                                  | 0.381                                                     | 0.0000                                           | 0.0013                                                                      | 0.0000                                                                        |
| AY702103           | cDNA sequence<br>AY702103                                                          | AK133160         | -0.245                                                  | 0.192                                                     | 0.0486                                           | 0.2728                                                                      | 0.1139                                                                        |
| B230120H23Rik      | RIKEN cDNA<br>B230120H23 gene                                                      | AK162819         | -0.330                                                  | 0.220                                                     | 0.0000                                           | 0.0014                                                                      | 0.0235                                                                        |
| B230209C24Rik      | RIKEN cDNA<br>B230209C24 gene                                                      | AK045534         | -0.408                                                  | 0.111                                                     | 0.0001                                           | 0.0007                                                                      | 0.1397                                                                        |
| B3galt1            | UDP-<br>Gal:betaGlcNAc<br>beta 1,3-<br>galactosyltransferase,<br>polypeptide 1     | NM_020283        | -0.406                                                  | 0.286                                                     | 0.0055                                           | 0.0721                                                                      | 0.0557                                                                        |
| Bach2              | BTB and CNC<br>homology 2                                                          | BC099420         | -0.342                                                  | 0.214                                                     | 0.0004                                           | 0.0063                                                                      | 0.0438                                                                        |
| Bard1              | BRCA1 associated<br>RING domain 1                                                  | NM_007525        | -0.253                                                  | 0.293                                                     | 0.0078                                           | 0.1188                                                                      | 0.0466                                                                        |
| Bbx                | bobby sox homolog<br>(Drosophila)                                                  | AK167724         | -0.458                                                  | 0.078                                                     | 0.0000                                           | 0.0000                                                                      | 0.4241                                                                        |
| BC016495           | cDNA sequence<br>BC016495                                                          | AK050579         | -0.444                                                  | 0.172                                                     | 0.0098                                           | 0.0273                                                                      | 0.2282                                                                        |
| BC018465           | cDNA sequence<br>BC018465                                                          | NM_144890        | -0.239                                                  | 0.167                                                     | 0.0257                                           | 0.0566                                                                      | 0.2814                                                                        |
| BC056349           | NA                                                                                 | NM_177757        | -0.276                                                  | 0.319                                                     | 0.0004                                           | 0.0180                                                                      | 0.0166                                                                        |

**Table S2.** Continued.

| <b>Gene Symbol</b> | <b>Gene Name</b>                                           | <b>Entrez ID</b> | <b>Fold Change<br/><i>MECP2</i>-<br/>Tg over<br/>WT</b> | <b>Fold Change<br/><i>Mecp2</i>-<br/>null over<br/>WT</b> | <b>FDR-<br/>adjusted<br/>p-value<br/>(Total)</b> | <b>FDR-<br/>adjusted<br/>p-value<br/>(<i>MECP2</i>-<br/>Tg over<br/>WT)</b> | <b>FDR-<br/>adjusted<br/>p-value<br/>(<i>Mecp2</i>-<br/>null over<br/>WT)</b> |
|--------------------|------------------------------------------------------------|------------------|---------------------------------------------------------|-----------------------------------------------------------|--------------------------------------------------|-----------------------------------------------------------------------------|-------------------------------------------------------------------------------|
| BC057079           | cDNA sequence<br>BC057079                                  | XM_989294        | -0.204                                                  | 0.254                                                     | 0.0000                                           | 0.0000                                                                      | 0.0000                                                                        |
| Bcl11a             | B-cell<br>CLL/lymphoma<br>11A (zinc finger<br>protein)     | AK140949         | -0.177                                                  | 0.405                                                     | 0.0025                                           | 0.1590                                                                      | 0.0110                                                                        |
| Bcl6               | B-cell leukemia<br>/lymphoma 6                             | AK036975         | -0.185                                                  | 0.341                                                     | 0.0001                                           | 0.1213                                                                      | 0.0004                                                                        |
| Best3              | NA                                                         | NM_001007<br>583 | -0.284                                                  | 0.214                                                     | 0.0130                                           | 0.0321                                                                      | 0.2544                                                                        |
| Bmper              | BMP-binding<br>endothelial regulator                       | NM_028472        | -0.178                                                  | 0.228                                                     | 0.0000                                           | 0.0504                                                                      | 0.0000                                                                        |
| C030044C12Rik      | RIKEN cDNA<br>C030044C12 gene                              | AK030860         | -0.298                                                  | 0.345                                                     | 0.0342                                           | 0.1930                                                                      | 0.1164                                                                        |
| C130030J05         | NA                                                         | AK048019         | -0.288                                                  | 0.244                                                     | 0.0218                                           | 0.0550                                                                      | 0.2518                                                                        |
| C130089L09Rik      | RIKEN cDNA<br>C130089L09 gene                              | AK081955         | -0.223                                                  | 0.207                                                     | 0.0068                                           | 0.1234                                                                      | 0.0395                                                                        |
| C230071H17Rik      | NA                                                         | AK048805         | -0.730                                                  | 0.352                                                     | 0.0047                                           | 0.0033                                                                      | 0.5592                                                                        |
| C230079O03         | NA                                                         | AK048899         | -0.690                                                  | 0.027                                                     | 0.0297                                           | 0.0081                                                                      | 0.9724                                                                        |
| C230081A13Rik      | RIKEN cDNA<br>C230081A13 gene                              | AK173328         | -0.381                                                  | 0.235                                                     | 0.0002                                           | 0.0040                                                                      | 0.0302                                                                        |
| C330020E22Rik      | NA                                                         | AK079836         | -0.464                                                  | 0.512                                                     | 0.0185                                           | 0.2032                                                                      | 0.0604                                                                        |
| C530014P21Rik      | NA                                                         | AK085434         | -0.327                                                  | 0.476                                                     | 0.0169                                           | 0.0595                                                                      | 0.1868                                                                        |
| C630007B19Rik      | RIKEN cDNA<br>C630007B19 gene                              | NM_182808        | -0.473                                                  | 0.564                                                     | 0.0000                                           | 0.0003                                                                      | 0.0000                                                                        |
| C630035N08Rik      | RIKEN cDNA<br>C630035N08 gene                              | NM_175427        | -0.542                                                  | 0.364                                                     | 0.0029                                           | 0.0075                                                                      | 0.2274                                                                        |
| C920021L13Rik      | NA                                                         | AK044447         | -0.549                                                  | 0.209                                                     | 0.0102                                           | 0.0125                                                                      | 0.4114                                                                        |
| Cabp7              | calcium binding<br>protein 7                               | NM_138948        | -0.066                                                  | 0.498                                                     | 0.0326                                           | 0.8158                                                                      | 0.0165                                                                        |
| Caln1              | calneuron 1                                                | AF282251         | -0.236                                                  | 0.182                                                     | 0.0028                                           | 0.0455                                                                      | 0.0463                                                                        |
| Camk1d             | calcium/calmodulin-<br>dependent protein<br>kinase ID      | NM_177343        | -0.429                                                  | 0.379                                                     | 0.0000                                           | 0.0000                                                                      | 0.0000                                                                        |
| Camk4              | calcium/calmodulin-<br>dependent protein<br>kinase IV      | AK043457         | -0.343                                                  | 0.112                                                     | 0.0000                                           | 0.0000                                                                      | 0.0707                                                                        |
| Cap2               | CAP, adenylate<br>cyclase-associated<br>protein, 2 (yeast) | AK035556         | -0.253                                                  | 0.205                                                     | 0.0000                                           | 0.0000                                                                      | 0.0000                                                                        |
| Car8               | carbonic anhydrase8                                        | NM_007592        | -0.329                                                  | 0.092                                                     | 0.0002                                           | 0.0001                                                                      | 0.5029                                                                        |

**Table S2.** Continued.

| <b>Gene Symbol</b> | <b>Gene Name</b>                                                      | <b>Entrez ID</b> | <b>Fold Change<br/><i>MECP2</i>-<br/>Tg over<br/>WT</b> | <b>Fold Change<br/><i>Mecp2</i>-<br/>null over<br/>WT</b> | <b>FDR-<br/>adjusted<br/>p-value<br/>(Total)</b> | <b>FDR-<br/>adjusted<br/>p-value<br/>(<i>MECP2</i>-<br/>Tg over<br/>WT)</b> | <b>FDR-<br/>adjusted<br/>p-value<br/>(<i>Mecp2</i>-<br/>null over<br/>WT)</b> |
|--------------------|-----------------------------------------------------------------------|------------------|---------------------------------------------------------|-----------------------------------------------------------|--------------------------------------------------|-----------------------------------------------------------------------------|-------------------------------------------------------------------------------|
| Casq2              | calsequestrin 2                                                       | NM_009814        | -0.336                                                  | 0.085                                                     | 0.0271                                           | 0.0151                                                                      | 0.6966                                                                        |
| Ccbe1              | collagen and<br>calcium binding<br>EGF domains 1                      | AK028377         | -0.198                                                  | 0.209                                                     | 0.0327                                           | 0.1542                                                                      | 0.1405                                                                        |
| Ccdc11             | coiled-coil domain<br>containing 11                                   | NM_028948        | -0.470                                                  | 0.367                                                     | 0.0273                                           | 0.1270                                                                      | 0.1435                                                                        |
| Ccdc27             | NA                                                                    | NM_001033<br>455 | -0.251                                                  | 0.246                                                     | 0.0108                                           | 0.0517                                                                      | 0.1445                                                                        |
| Ccl1               | chemokine (C-C<br>motif) ligand 1                                     | BC042744         | -0.353                                                  | 0.202                                                     | 0.0145                                           | 0.0181                                                                      | 0.4159                                                                        |
| Cdh12              | NA                                                                    | NM_001008<br>420 | -0.551                                                  | 0.211                                                     | 0.0000                                           | 0.0000                                                                      | 0.0020                                                                        |
| Cdh13              | cadherin 13                                                           | AK029195         | -0.312                                                  | 0.205                                                     | 0.0000                                           | 0.0000                                                                      | 0.0031                                                                        |
| Cdh6               | cadherin 6                                                            | NM_007666        | -0.550                                                  | 0.269                                                     | 0.0000                                           | 0.0000                                                                      | 0.0013                                                                        |
| Cdk6               | cyclin-dependent<br>kinase 6                                          | NM_009873        | -0.265                                                  | 0.250                                                     | 0.0428                                           | 0.2127                                                                      | 0.1305                                                                        |
| Ceacam16           | CEA-related cell<br>adhesion molecule<br>16                           | NM_001033<br>419 | -0.391                                                  | 0.102                                                     | 0.0319                                           | 0.0161                                                                      | 0.7424                                                                        |
| Ceacam18           | CEA-related cell<br>adhesion molecule 1                               | NM_028236        | -0.255                                                  | 0.170                                                     | 0.0443                                           | 0.0549                                                                      | 0.4399                                                                        |
| Chrnd              | cholinergic receptor,<br>nicotinic, delta<br>polypeptide              | AK081344         | -0.157                                                  | 0.278                                                     | 0.0192                                           | 0.2312                                                                      | 0.0543                                                                        |
| Chrne              | cholinergic receptor,<br>nicotinic, epsilon<br>polypeptide            | NM_009603        | -0.275                                                  | 0.307                                                     | 0.0021                                           | 0.0525                                                                      | 0.0305                                                                        |
| Chst8              | carbohydrate (N-<br>acetylgalactosamine<br>4-O) sulfotransferase<br>8 | AK051290         | -0.290                                                  | 0.220                                                     | 0.0004                                           | 0.0137                                                                      | 0.0212                                                                        |
| Clstn2             | calsyntenin 2                                                         | NM_022319        | -0.339                                                  | 0.428                                                     | 0.0000                                           | 0.0000                                                                      | 0.0000                                                                        |
| Clybl              | citrate lyase beta<br>like                                            | NM_029556        | -0.325                                                  | 0.102                                                     | 0.0071                                           | 0.0221                                                                      | 0.2045                                                                        |
| Cnksr3             | Cnksr family<br>member 3                                              | BC031194         | -0.296                                                  | 0.163                                                     | 0.0001                                           | 0.0075                                                                      | 0.0088                                                                        |
| Col4a2             | procollagen, type<br>IV, alpha 2                                      | NM_009932        | -0.251                                                  | 0.249                                                     | 0.0000                                           | 0.0000                                                                      | 0.0000                                                                        |
| Colec11            | collectin sub-family<br>member 11                                     | NM_027866        | -0.290                                                  | 0.223                                                     | 0.0165                                           | 0.0799                                                                      | 0.1413                                                                        |
| Coro6              | coronin, actin<br>binding protein 6                                   | NM_139128        | -0.412                                                  | 0.229                                                     | 0.0000                                           | 0.0000                                                                      | 0.0000                                                                        |

**Table S2.** Continued.

| <b>Gene Symbol</b> | <b>Gene Name</b>                                                    | <b>Entrez ID</b> | <b>Fold Change<br/><i>MECP2</i>-<br/>Tg over<br/>WT</b> | <b>Fold Change<br/><i>Mecp2</i>-<br/>null over<br/>WT</b> | <b>FDR-<br/>adjusted<br/>p-value<br/>(Total)</b> | <b>FDR-<br/>adjusted<br/>p-value<br/>(<i>MECP2</i>-<br/>Tg over<br/>WT)</b> | <b>FDR-<br/>adjusted<br/>p-value<br/>(<i>Mecp2</i>-<br/>null over<br/>WT)</b> |
|--------------------|---------------------------------------------------------------------|------------------|---------------------------------------------------------|-----------------------------------------------------------|--------------------------------------------------|-----------------------------------------------------------------------------|-------------------------------------------------------------------------------|
| Crim1              | cysteine rich<br>transmembrane<br>BMP regulator 1<br>(chordin like) | AK053197         | -0.225                                                  | 0.272                                                     | 0.0000                                           | 0.0000                                                                      | 0.0000                                                                        |
| Ctrb1              | chymotrypsinogen<br>B1                                              | NM_025583        | -0.406                                                  | 0.039                                                     | 0.0313                                           | 0.0099                                                                      | 0.9152                                                                        |
| Cxcl12             | chemokine (C-X-C<br>motif) ligand 12                                | NM_021704        | -0.258                                                  | 0.151                                                     | 0.0195                                           | 0.1418                                                                      | 0.0939                                                                        |
| Cyp11b1            | cytochrome P450,<br>family 11,<br>subfamily b,<br>polypeptide 1     | XM_001006<br>812 | -0.216                                                  | 0.328                                                     | 0.0097                                           | 0.3222                                                                      | 0.0183                                                                        |
| Cyp2u1             | cytochrome P450,<br>family 2, subfamily<br>u, polypeptide 1         | NM_027816        | -0.229                                                  | 0.187                                                     | 0.0140                                           | 0.2105                                                                      | 0.0447                                                                        |
| D230039L06Rik      | NA                                                                  | NM_177724        | -0.217                                                  | 0.297                                                     | 0.0033                                           | 0.0778                                                                      | 0.0312                                                                        |
| D930030D11Rik      | NA                                                                  | AK164171         | -0.295                                                  | 0.335                                                     | 0.0024                                           | 0.1876                                                                      | 0.0086                                                                        |
| D930044I17Rik      | NA                                                                  | AK086664         | -0.669                                                  | 0.532                                                     | 0.0035                                           | 0.0358                                                                      | 0.0713                                                                        |
| Dab1               | disabled homolog 1<br>(Drosophila)                                  | BC051993         | -0.243                                                  | 0.404                                                     | 0.0000                                           | 0.0347                                                                      | 0.0000                                                                        |
| Dcc                | deleted in colorectal<br>carcinoma                                  | NM_007831        | -0.317                                                  | 0.200                                                     | 0.0000                                           | 0.0000                                                                      | 0.0000                                                                        |
| Dgkg               | diacylglycerol<br>kinase, gamma                                     | AK037612         | -0.349                                                  | 0.325                                                     | 0.0000                                           | 0.0000                                                                      | 0.0000                                                                        |
| Dgkh               | diacylglycerol<br>kinase, eta                                       | XM_895030        | -0.292                                                  | 0.325                                                     | 0.0000                                           | 0.0000                                                                      | 0.0000                                                                        |
| Dlgap2             | discs, large<br>(Drosophila)<br>homolog-associated<br>protein 2     | NM_172910        | -0.306                                                  | 0.362                                                     | 0.0000                                           | 0.0002                                                                      | 0.0008                                                                        |
| Dpy19l3            | dpy-19-like 3 (C.<br>elegans)                                       | NM_178704        | -0.327                                                  | 0.079                                                     | 0.0000                                           | 0.0000                                                                      | 0.1557                                                                        |
| Drd3               | dopamine receptor 3                                                 | NM_007877        | -0.419                                                  | 0.191                                                     | 0.0003                                           | 0.0011                                                                      | 0.1681                                                                        |
| E2f8               | E2F transcription<br>factor 8                                       | AY957576         | -0.221                                                  | 0.197                                                     | 0.0236                                           | 0.1319                                                                      | 0.1214                                                                        |
| E430014B02Rik      | NA                                                                  | AK088368         | -0.156                                                  | 0.405                                                     | 0.0406                                           | 0.7822                                                                      | 0.0227                                                                        |
| EG224276           | NA                                                                  | NM_019643        | -0.155                                                  | 0.514                                                     | 0.0304                                           | 0.6946                                                                      | 0.0203                                                                        |
| EG239502           | NA                                                                  | NM_153093        | -0.670                                                  | 0.233                                                     | 0.0017                                           | 0.0119                                                                      | 0.1014                                                                        |
| EG243423           | NA                                                                  | AF086602         | -0.423                                                  | 0.329                                                     | 0.0367                                           | 0.0511                                                                      | 0.4029                                                                        |
| EG434181           | NA                                                                  | BC100510         | -0.263                                                  | 0.284                                                     | 0.0204                                           | 0.0216                                                                      | 0.4727                                                                        |
| EG436081           | NA                                                                  | XM_983082        | -0.467                                                  | 0.971                                                     | 0.0018                                           | 0.0058                                                                      | 0.1920                                                                        |

**Table S2.** Continued.

| <b>Gene Symbol</b> | <b>Gene Name</b>                                                                            | <b>Entrez ID</b> | <b>Fold Change<br/><i>MECP2</i>-<br/>Tg over<br/>WT</b> | <b>Fold Change<br/><i>Mecp2</i>-<br/>null over<br/>WT</b> | <b>FDR-<br/>adjusted<br/>p-value<br/>(Total)</b> | <b>FDR-<br/>adjusted<br/>p-value<br/>(<i>MECP2</i>-<br/>Tg over<br/>WT)</b> | <b>FDR-<br/>adjusted<br/>p-value<br/>(<i>Mecp2</i>-<br/>null over<br/>WT)</b> |
|--------------------|---------------------------------------------------------------------------------------------|------------------|---------------------------------------------------------|-----------------------------------------------------------|--------------------------------------------------|-----------------------------------------------------------------------------|-------------------------------------------------------------------------------|
| EG666606           | NA                                                                                          | XM_986444        | -0.371                                                  | 0.302                                                     | 0.0364                                           | 0.0405                                                                      | 0.4693                                                                        |
| EG668311           | NA                                                                                          | XM_923724        | -0.416                                                  | 0.367                                                     | 0.0444                                           | 0.0770                                                                      | 0.3431                                                                        |
| Egln3              | EGL nine homolog<br>3 ( <i>C. elegans</i> )                                                 | BC044926         | -0.325                                                  | 0.297                                                     | 0.0018                                           | 0.0417                                                                      | 0.0342                                                                        |
| Elm1               | engulfment and cell<br>motility 1, <i>ced-12</i><br>homolog ( <i>C.</i><br><i>elegans</i> ) | AK028389         | -0.298                                                  | 0.107                                                     | 0.0000                                           | 0.0000                                                                      | 0.0049                                                                        |
| Elmod1             | ELMO domain<br>containing 1                                                                 | AK029207         | -0.336                                                  | 0.148                                                     | 0.0000                                           | 0.0000                                                                      | 0.0187                                                                        |
| Elov13             | elongation of very<br>long chain fatty<br>acids (FEN1/Elo2,<br>SUR4/Elo3, yeast)-<br>like 3 | NM_007703        | -0.548                                                  | 0.002                                                     | 0.0294                                           | 0.0074                                                                      | 0.9971                                                                        |
| Epb4.1             | erythrocyte protein<br>band 4.1                                                             | AK148569         | -0.306                                                  | 0.098                                                     | 0.0000                                           | 0.0000                                                                      | 0.1534                                                                        |
| Epha4              | Eph receptor A4                                                                             | AK132203         | -0.192                                                  | 0.227                                                     | 0.0000                                           | 0.0011                                                                      | 0.0000                                                                        |
| Epha6              | Eph receptor A6                                                                             | NM_007938        | -0.267                                                  | 0.199                                                     | 0.0000                                           | 0.0000                                                                      | 0.0005                                                                        |
| Ero1lb             | ERO1-like beta ( <i>S.</i><br><i>cerevisiae</i> )                                           | AK006886         | -0.259                                                  | 0.249                                                     | 0.0000                                           | 0.0013                                                                      | 0.0004                                                                        |
| Etv6               | ets variant gene 6<br>(TEL oncogene)                                                        | NM_007961        | -0.296                                                  | 0.170                                                     | 0.0018                                           | 0.0063                                                                      | 0.1804                                                                        |
| F730043M19Rik      | NA                                                                                          | AK089514         | -0.529                                                  | 0.382                                                     | 0.0018                                           | 0.0457                                                                      | 0.0310                                                                        |
| Fbxw7              | F-box and WD-40<br>domain protein 7,<br>archipelago<br>homolog<br>( <i>Drosophila</i> )     | BC060620         | -0.290                                                  | 0.185                                                     | 0.0000                                           | 0.0000                                                                      | 0.0001                                                                        |
| Fkbp5              | FK506 binding<br>protein 5                                                                  | AK159389         | -0.072                                                  | 0.349                                                     | 0.0000                                           | 0.6916                                                                      | 0.0000                                                                        |
| Flnb               | filamin, beta                                                                               | XM_977444        | -0.250                                                  | 0.156                                                     | 0.0000                                           | 0.0000                                                                      | 0.0000                                                                        |
| Flrt3              | fibronectin leucine<br>rich transmembrane<br>protein 3                                      | AK045146         | -0.558                                                  | 0.772                                                     | 0.0000                                           | 0.0047                                                                      | 0.0000                                                                        |
| Flt3               | FMS-like tyrosine<br>kinase 3                                                               | NM_010229        | -0.340                                                  | 0.142                                                     | 0.0000                                           | 0.0000                                                                      | 0.0017                                                                        |
| Fndc1              | fibronectin type III<br>domain containing 1                                                 | XM_974498        | -0.335                                                  | 0.202                                                     | 0.0000                                           | 0.0000                                                                      | 0.0092                                                                        |
| Foxp1              | forkhead box P1                                                                             | AK040800         | -0.214                                                  | 0.189                                                     | 0.0000                                           | 0.0005                                                                      | 0.0000                                                                        |
| Fras1              | Fraser syndrome 1<br>homolog (human)                                                        | NM_175473        | -0.384                                                  | 0.136                                                     | 0.0000                                           | 0.0000                                                                      | 0.0000                                                                        |

**Table S2.** Continued.

| <b>Gene Symbol</b> | <b>Gene Name</b>                                                                                                 | <b>Entrez ID</b> | <b>Fold Change<br/><i>MECP2</i>-<br/>Tg over<br/>WT</b> | <b>Fold Change<br/><i>Mecp2</i>-<br/>null over<br/>WT</b> | <b>FDR-<br/>adjusted<br/>p-value<br/>(Total)</b> | <b>FDR-<br/>adjusted<br/>p-value<br/>(<i>MECP2</i>-<br/>Tg over<br/>WT)</b> | <b>FDR-<br/>adjusted<br/>p-value<br/>(<i>Mecp2</i>-<br/>null over<br/>WT)</b> |
|--------------------|------------------------------------------------------------------------------------------------------------------|------------------|---------------------------------------------------------|-----------------------------------------------------------|--------------------------------------------------|-----------------------------------------------------------------------------|-------------------------------------------------------------------------------|
| Fryl               | NA                                                                                                               | AK164590         | -0.365                                                  | 0.124                                                     | 0.0000                                           | 0.0000                                                                      | 0.0000                                                                        |
| Fscn3              | fascin homolog 3,<br>actin-bundling<br>protein, testicular<br>( <i>Strongylocentrotus</i><br><i>purpuratus</i> ) | AF176024         | -0.271                                                  | 0.270                                                     | 0.0077                                           | 0.1403                                                                      | 0.0387                                                                        |
| Fstl4              | follistatin-like 4                                                                                               | NM_177059        | -0.463                                                  | 0.459                                                     | 0.0000                                           | 0.0000                                                                      | 0.0000                                                                        |
| Gfra1              | glial cell line<br>derived<br>neurotrophic factor<br>family receptor<br>alpha 1                                  | NM_010279        | -0.111                                                  | 0.331                                                     | 0.0000                                           | 0.1420                                                                      | 0.0000                                                                        |
| Gimap4             | GTPase, IMAP<br>family member 4                                                                                  | NM_174990        | -0.474                                                  | 0.239                                                     | 0.0276                                           | 0.0423                                                                      | 0.3707                                                                        |
| Glp1r              | glucagon-like<br>peptide 1 receptor                                                                              | XM_001000<br>702 | -0.208                                                  | 0.404                                                     | 0.0000                                           | 0.0795                                                                      | 0.0000                                                                        |
| Gm944              | gene model 944,<br>(NCBI)                                                                                        | AK220564         | -0.239                                                  | 0.235                                                     | 0.0042                                           | 0.2312                                                                      | 0.0117                                                                        |
| Gpc6               | glypican 6                                                                                                       | AK141752         | -0.350                                                  | 0.297                                                     | 0.0000                                           | 0.0007                                                                      | 0.0001                                                                        |
| Gpr133             | G protein-coupled<br>receptor 133                                                                                | XM_924876        | -0.258                                                  | 0.462                                                     | 0.0000                                           | 0.0298                                                                      | 0.0000                                                                        |
| Greb1              | NA                                                                                                               | NM_015764        | -0.368                                                  | 0.224                                                     | 0.0000                                           | 0.0000                                                                      | 0.0015                                                                        |
| Grin2a             | glutamate receptor,<br>ionotropic,NMDA2<br>A(epsilon1)                                                           | XM_988553        | -0.469                                                  | 0.581                                                     | 0.0000                                           | 0.0000                                                                      | 0.0000                                                                        |
| Grip1              | glutamate receptor<br>interacting protein 1                                                                      | NM_133442        | -0.405                                                  | 0.077                                                     | 0.0000                                           | 0.0000                                                                      | 0.2297                                                                        |
| Grm1               | glutamate receptor,<br>metabotropic 1                                                                            | NM_016976        | -0.230                                                  | 0.230                                                     | 0.0000                                           | 0.0000                                                                      | 0.0000                                                                        |
| Gsdmdc2            | NA                                                                                                               | XM_979344        | -0.492                                                  | 0.108                                                     | 0.0367                                           | 0.0146                                                                      | 0.8351                                                                        |
| Guca2a             | guanylate cyclase<br>activator 2a<br>(guanylin)                                                                  | NM_008190        | -0.242                                                  | 0.536                                                     | 0.0062                                           | 0.3650                                                                      | 0.0098                                                                        |
| Gucy1b2            | NA                                                                                                               | XM_981583        | -0.316                                                  | 0.184                                                     | 0.0029                                           | 0.0170                                                                      | 0.1177                                                                        |
| Hcn1               | hyperpolarization-<br>activated, cyclic<br>nucleotide-gated K <sup>+</sup><br>1                                  | NM_010408        | -0.330                                                  | 0.265                                                     | 0.0000                                           | 0.0535                                                                      | 0.0001                                                                        |
| Hdac9              | histone deacetylase9                                                                                             | AK133334         | -0.288                                                  | 0.296                                                     | 0.0000                                           | 0.0000                                                                      | 0.0000                                                                        |
| Hrc                | histidine rich<br>calcium binding<br>protein                                                                     | NM_010473        | -0.241                                                  | 0.225                                                     | 0.0216                                           | 0.1107                                                                      | 0.1330                                                                        |



**Table S2.** Continued.

| <b>Gene Symbol</b> | <b>Gene Name</b>                                                                      | <b>Entrez ID</b> | <b>Fold Change<br/><i>MECP2</i>-<br/>Tg over<br/>WT</b> | <b>Fold Change<br/><i>Mecp2</i>-<br/>null over<br/>WT</b> | <b>FDR-<br/>adjusted<br/>p-value<br/>(Total)</b> | <b>FDR-<br/>adjusted<br/>p-value<br/>(<i>MECP2</i>-<br/>Tg over<br/>WT)</b> | <b>FDR-<br/>adjusted<br/>p-value<br/>(<i>Mecp2</i>-<br/>null over<br/>WT)</b> |
|--------------------|---------------------------------------------------------------------------------------|------------------|---------------------------------------------------------|-----------------------------------------------------------|--------------------------------------------------|-----------------------------------------------------------------------------|-------------------------------------------------------------------------------|
| Hs2st1             | heparan sulfate 2-O-<br>sulfotransferase 1                                            | NM_011828        | -0.249                                                  | 0.173                                                     | 0.0112                                           | 0.2868                                                                      | 0.0245                                                                        |
| Hs6st3             | heparan sulfate 6-O-<br>sulfotransferase 3                                            | NM_015820        | -0.417                                                  | 0.629                                                     | 0.0000                                           | 0.0316                                                                      | 0.0000                                                                        |
| Hsd17b2            | hydroxysteroid (17-<br>beta) dehydrogenase<br>2                                       | NM_008290        | -0.467                                                  | 0.305                                                     | 0.0212                                           | 0.0357                                                                      | 0.3437                                                                        |
| Ifna6              | interferon alpha<br>family, gene 6                                                    | NM_008334        | -0.734                                                  | 0.959                                                     | 0.0037                                           | 0.0956                                                                      | 0.0282                                                                        |
| Igflr              | NA                                                                                    | NM_010513        | -0.359                                                  | 0.181                                                     | 0.0000                                           | 0.0000                                                                      | 0.0000                                                                        |
| Igl-V1             | immunoglobulin<br>lambda chain,<br>variable 1                                         | AK008094         | -0.268                                                  | 0.243                                                     | 0.0489                                           | 0.0371                                                                      | 0.6077                                                                        |
| Il1rap             | interleukin 1<br>receptor accessory<br>protein                                        | NM_008364        | -0.464                                                  | 0.221                                                     | 0.0000                                           | 0.0000                                                                      | 0.0360                                                                        |
| Il1rn              | interleukin 1<br>receptor antagonist<br>701                                           | NM_001039        | -0.422                                                  | 0.005                                                     | 0.0210                                           | 0.0052                                                                      | 0.9910                                                                        |
| Iqgap2             | IQ motif containing<br>GTPase activating<br>protein 2                                 | AK147360         | -0.181                                                  | 0.433                                                     | 0.0000                                           | 0.0185                                                                      | 0.0015                                                                        |
| Itpr1              | inositol 1,4,5-<br>triphosphate<br>receptor 1                                         | NM_010585        | -0.600                                                  | 0.429                                                     | 0.0000                                           | 0.0000                                                                      | 0.0000                                                                        |
| Iyd                | NA                                                                                    | NM_027391        | -0.632                                                  | 0.128                                                     | 0.0193                                           | 0.0117                                                                      | 0.6528                                                                        |
| Kcnab2             | potassium voltage-<br>gated channel,<br>shaker-related<br>subfamily, beta<br>member 2 | NM_010598        | -0.383                                                  | 0.172                                                     | 0.0000                                           | 0.0000                                                                      | 0.0000                                                                        |
| Kcnh1              | potassium voltage-<br>gated channel,<br>subfamily H (eag-<br>related), member 1       | NM_010600        | -0.381                                                  | 0.344                                                     | 0.0000                                           | 0.0055                                                                      | 0.0000                                                                        |
| Kcnh5              | potassium voltage-<br>gated channel,<br>subfamily H (eag-<br>related), member 5       | NM_172805        | -0.362                                                  | 0.314                                                     | 0.0000                                           | 0.0001                                                                      | 0.0000                                                                        |
| Kcnh7              | potassium voltage-<br>gated channel,<br>subfamily H (eag-<br>related), member 7       | NM_133207        | -0.389                                                  | 0.159                                                     | 0.0000                                           | 0.0000                                                                      | 0.0018                                                                        |

**Table S2.** Continued.

| <b>Gene Symbol</b> | <b>Gene Name</b>                                       | <b>Entrez ID</b> | <b>Fold Change<br/><i>MECP2</i>-<br/>Tg over<br/>WT</b> | <b>Fold Change<br/><i>Mecp2</i>-<br/>null over<br/>WT</b> | <b>FDR-<br/>adjusted<br/>p-value<br/>(Total)</b> | <b>FDR-<br/>adjusted<br/>p-value<br/>(<i>MECP2</i>-<br/>Tg over<br/>WT)</b> | <b>FDR-<br/>adjusted<br/>p-value<br/>(<i>Mecp2</i>-<br/>null over<br/>WT)</b> |
|--------------------|--------------------------------------------------------|------------------|---------------------------------------------------------|-----------------------------------------------------------|--------------------------------------------------|-----------------------------------------------------------------------------|-------------------------------------------------------------------------------|
| Kcnip4             | Kv channel interacting protein 4                       | NM_030265        | -0.309                                                  | 0.118                                                     | 0.0000                                           | 0.0000                                                                      | 0.0313                                                                        |
| Kctd16             | potassium channel tetramerisation domain containing 16 | XM_993798        | -0.257                                                  | 0.468                                                     | 0.0065                                           | 0.4205                                                                      | 0.0085                                                                        |
| Klf17              | NA                                                     | NM_029416        | -0.087                                                  | 0.362                                                     | 0.0258                                           | 0.6246                                                                      | 0.0202                                                                        |
| Klk1               | kallikrein 1                                           | NM_010639        | -0.429                                                  | 0.393                                                     | 0.0001                                           | 0.0072                                                                      | 0.0078                                                                        |
| Kmo                | kynurenine 3-monooxygenase (kynurenine 3-hydroxylase)  | AK129011         | -0.533                                                  | 0.126                                                     | 0.0001                                           | 0.0000                                                                      | 0.4765                                                                        |
| Krt33a             | NA                                                     | NM_027983        | -0.316                                                  | 0.326                                                     | 0.0163                                           | 0.1662                                                                      | 0.0666                                                                        |
| Krt82              | NA                                                     | NM_053249        | -0.258                                                  | 0.298                                                     | 0.0112                                           | 0.0558                                                                      | 0.1385                                                                        |
| Lamb1-1            | laminin B1 subunit1                                    | AK051131         | -0.405                                                  | 0.174                                                     | 0.0000                                           | 0.0000                                                                      | 0.0006                                                                        |
| Lame2              | laminin, gamma 2                                       | AF106279         | -0.313                                                  | 0.146                                                     | 0.0000                                           | 0.0000                                                                      | 0.1220                                                                        |
| Lass6              | longevity assurance homolog 6 ( <i>S. cerevisiae</i> ) | AK136463         | -0.246                                                  | 0.221                                                     | 0.0001                                           | 0.0103                                                                      | 0.0107                                                                        |
| Lcn12              | lipocalin 12                                           | AK020307         | -0.230                                                  | 0.197                                                     | 0.0411                                           | 0.1040                                                                      | 0.2504                                                                        |
| Lct                | lactase                                                | XM_129479        | -0.107                                                  | 0.649                                                     | 0.0310                                           | 0.3949                                                                      | 0.0463                                                                        |
| Lmo3               | LIM domain only 3                                      | BC057086         | -0.212                                                  | 0.218                                                     | 0.0359                                           | 0.0832                                                                      | 0.2697                                                                        |
| Lmo7               | LIM domain only 7                                      | AK143133         | -0.530                                                  | 0.115                                                     | 0.0000                                           | 0.0000                                                                      | 0.0995                                                                        |
| LOC331000          | NA                                                     | XM_990270        | -0.232                                                  | 0.226                                                     | 0.0455                                           | 0.1186                                                                      | 0.2423                                                                        |
| LOC385333          | NA                                                     | XR_002718        | -0.354                                                  | 0.415                                                     | 0.0459                                           | 0.1141                                                                      | 0.2541                                                                        |
| LOC385448          | NA                                                     | XR_002972        | -0.563                                                  | 0.486                                                     | 0.0488                                           | 0.1146                                                                      | 0.2670                                                                        |
| LOC436147          | NA                                                     | NM_009485        | -0.298                                                  | 0.164                                                     | 0.0428                                           | 0.0406                                                                      | 0.5262                                                                        |
| LOC630557          | NA                                                     | NM_016678        | -0.245                                                  | 0.197                                                     | 0.0001                                           | 0.0528                                                                      | 0.0017                                                                        |
| LOC632536          | NA                                                     | XR_002466        | -0.049                                                  | 0.477                                                     | 0.0318                                           | 0.9182                                                                      | 0.0127                                                                        |
| LOC635671          | NA                                                     | XM_975990        | -0.440                                                  | 0.437                                                     | 0.0152                                           | 0.1395                                                                      | 0.0751                                                                        |
| LOC636534          | NA                                                     | AK054457         | -0.318                                                  | 0.153                                                     | 0.0150                                           | 0.0411                                                                      | 0.2327                                                                        |
| LOC638024          | NA                                                     | NM_010678        | -0.311                                                  | 0.392                                                     | 0.0098                                           | 0.3797                                                                      | 0.0149                                                                        |
| LOC638275          | NA                                                     | XM_001003348     | -0.293                                                  | 0.180                                                     | 0.0186                                           | 0.0759                                                                      | 0.1638                                                                        |
| LOC638935          | NA                                                     | AK168685         | -0.445                                                  | 0.064                                                     | 0.0264                                           | 0.0094                                                                      | 0.8609                                                                        |
| LOC639376          | NA                                                     | NM_175367        | -0.268                                                  | 0.302                                                     | 0.0337                                           | 0.1851                                                                      | 0.1199                                                                        |
| LOC640277          | NA                                                     | XM_888068        | -0.572                                                  | 0.566                                                     | 0.0037                                           | 0.0305                                                                      | 0.0887                                                                        |
| LOC665446          | NA                                                     | X00696           | -0.313                                                  | 0.666                                                     | 0.0441                                           | 0.6205                                                                      | 0.0361                                                                        |
| LOC666218          | NA                                                     | XM_985665        | -0.294                                                  | 0.354                                                     | 0.0172                                           | 0.2896                                                                      | 0.0374                                                                        |

**Table S2.** Continued.

| <b>Gene Symbol</b> | <b>Gene Name</b>                                                         | <b>Entrez ID</b> | <b>Fold Change<br/><i>MECP2</i>-<br/>Tg over<br/>WT</b> | <b>Fold Change<br/><i>Mecp2</i>-<br/>null over<br/>WT</b> | <b>FDR-<br/>adjusted<br/>p-value<br/>(Total)</b> | <b>FDR-<br/>adjusted<br/>p-value<br/>(<i>MECP2</i>-<br/>Tg over<br/>WT)</b> | <b>FDR-<br/>adjusted<br/>p-value<br/>(<i>Mecp2</i>-<br/>null over<br/>WT)</b> |
|--------------------|--------------------------------------------------------------------------|------------------|---------------------------------------------------------|-----------------------------------------------------------|--------------------------------------------------|-----------------------------------------------------------------------------|-------------------------------------------------------------------------------|
| LOC667574          | NA                                                                       | XM_991287        | -0.688                                                  | 0.292                                                     | 0.0321                                           | 0.0160                                                                      | 0.7465                                                                        |
| LOC668978          | NA                                                                       | XR_002277        | -0.586                                                  | 0.565                                                     | 0.0222                                           | 0.1125                                                                      | 0.1341                                                                        |
| LOC669001          | NA                                                                       | NM_010100        | -0.208                                                  | 0.273                                                     | 0.0159                                           | 0.2557                                                                      | 0.0404                                                                        |
| LOC669205          | NA                                                                       | XM_895977        | -0.437                                                  | 0.537                                                     | 0.0000                                           | 0.0008                                                                      | 0.0000                                                                        |
| LOC669222          | NA                                                                       | XM_975713        | -0.559                                                  | 0.831                                                     | 0.0423                                           | 0.0712                                                                      | 0.3513                                                                        |
| LOC669253          | NA                                                                       | XM_974035        | -0.995                                                  | 0.845                                                     | 0.0030                                           | 0.0113                                                                      | 0.1692                                                                        |
| LOC669755          | NA                                                                       | XM_977157        | -0.550                                                  | 0.283                                                     | 0.0210                                           | 0.2141                                                                      | 0.0648                                                                        |
| LOC669896          | NA                                                                       | XR_002712        | -0.290                                                  | 0.352                                                     | 0.0442                                           | 0.0717                                                                      | 0.3617                                                                        |
| LOC670350          | NA                                                                       | XM_485079        | -0.355                                                  | 0.327                                                     | 0.0293                                           | 0.3280                                                                      | 0.0550                                                                        |
| LOC671893          | NA                                                                       | XM_989719        | -0.352                                                  | 0.328                                                     | 0.0394                                           | 0.0765                                                                      | 0.3136                                                                        |
| LOC672708          | NA                                                                       | XM_909592        | -0.424                                                  | 0.863                                                     | 0.0175                                           | 0.5428                                                                      | 0.0165                                                                        |
| LOC673364          | NA                                                                       | XM_903363        | -0.146                                                  | 0.746                                                     | 0.0500                                           | 0.8526                                                                      | 0.0243                                                                        |
| LOC673990          | NA                                                                       | XM_001004<br>045 | -0.203                                                  | 0.424                                                     | 0.0446                                           | 0.2322                                                                      | 0.1241                                                                        |
| LOC674047          | NA                                                                       | M16122           | -0.447                                                  | 0.123                                                     | 0.0496                                           | 0.0304                                                                      | 0.6895                                                                        |
| LOC674102          | NA                                                                       | XR_002296        | -0.111                                                  | 0.551                                                     | 0.0488                                           | 0.7915                                                                      | 0.0271                                                                        |
| LOC674213          | NA                                                                       | XR_001648        | -0.372                                                  | 0.232                                                     | 0.0492                                           | 0.1480                                                                      | 0.2123                                                                        |
| LOC674611          | NA                                                                       | XM_980076        | -0.266                                                  | 0.172                                                     | 0.0001                                           | 0.0181                                                                      | 0.0056                                                                        |
| LOC675875          | NA                                                                       | XM_985738        | -0.471                                                  | 0.227                                                     | 0.0180                                           | 0.0178                                                                      | 0.4886                                                                        |
| LOC676038          | NA                                                                       | NM_001004<br>173 | -0.285                                                  | 0.160                                                     | 0.0083                                           | 0.0183                                                                      | 0.2730                                                                        |
| LOC676216          | NA                                                                       | XR_004894        | -0.159                                                  | 0.411                                                     | 0.0409                                           | 0.7250                                                                      | 0.0259                                                                        |
| LOC676553          | NA                                                                       | XM_484184        | -0.367                                                  | 0.602                                                     | 0.0431                                           | 0.2134                                                                      | 0.1310                                                                        |
| LOC676870          | NA                                                                       | XM_001003<br>209 | -0.321                                                  | 0.152                                                     | 0.0001                                           | 0.0010                                                                      | 0.0487                                                                        |
| Lonrf1             | NA                                                                       | XM_146279        | -0.350                                                  | 0.314                                                     | 0.0030                                           | 0.0270                                                                      | 0.0816                                                                        |
| Lphn2              | latrophilin 2                                                            | AK084598         | -0.722                                                  | 0.412                                                     | 0.0000                                           | 0.0000                                                                      | 0.0000                                                                        |
| Lpp                | LIM domain<br>containing preferred<br>translocation partner<br>in lipoma | AK029335         | -0.238                                                  | 0.200                                                     | 0.0000                                           | 0.0048                                                                      | 0.0073                                                                        |
| Lrp1b              | low density<br>lipoprotein-related<br>protein 1B (deleted<br>in tumors)  | NM_053011        | -0.258                                                  | 0.186                                                     | 0.0000                                           | 0.0000                                                                      | 0.0000                                                                        |
| Lrrc20             | leucine rich repeat<br>containing 20                                     | NM_153542        | -0.173                                                  | 0.277                                                     | 0.0001                                           | 0.1990                                                                      | 0.0003                                                                        |

**Table S2.** Continued.

| <b>Gene Symbol</b> | <b>Gene Name</b>                                                                 | <b>Entrez ID</b> | <b>Fold Change<br/><i>MECP2</i>-<br/>Tg over<br/>WT</b> | <b>Fold Change<br/><i>Mecp2</i>-<br/>null over<br/>WT</b> | <b>FDR-<br/>adjusted<br/>p-value<br/>(Total)</b> | <b>FDR-<br/>adjusted<br/>p-value<br/>(<i>MECP2</i>-<br/>Tg over<br/>WT)</b> | <b>FDR-<br/>adjusted<br/>p-value<br/>(<i>Mecp2</i>-<br/>null over<br/>WT)</b> |
|--------------------|----------------------------------------------------------------------------------|------------------|---------------------------------------------------------|-----------------------------------------------------------|--------------------------------------------------|-----------------------------------------------------------------------------|-------------------------------------------------------------------------------|
| Lrrtm1             | leucine rich repeat<br>transmembrane<br>neuronal 1                               | BC027803         | -0.215                                                  | 0.212                                                     | 0.0458                                           | 0.2493                                                                      | 0.1178                                                                        |
| Lrrtm2             | leucine rich repeat<br>transmembrane<br>neuronal 2                               | NM_178005        | -0.432                                                  | 0.106                                                     | 0.0018                                           | 0.0072                                                                      | 0.1590                                                                        |
| Lrrtm4             | leucine rich repeat<br>transmembrane<br>neuronal 4                               | AK033053         | -0.340                                                  | 0.315                                                     | 0.0007                                           | 0.0132                                                                      | 0.0392                                                                        |
| Ly75               | lymphocyte antigen<br>75                                                         | NM_013825        | -0.366                                                  | 0.137                                                     | 0.0000                                           | 0.0000                                                                      | 0.0795                                                                        |
| Magi2              | membrane<br>associated guanylate<br>kinase, WW and<br>PDZ domain<br>containing 2 | XM_001000<br>904 | -0.328                                                  | 0.185                                                     | 0.0000                                           | 0.0000                                                                      | 0.0000                                                                        |
| Map3k1             | mitogen activated<br>protein kinase<br>kinase kinase 1                           | XM_981580        | -0.296                                                  | 0.144                                                     | 0.0000                                           | 0.0001                                                                      | 0.0112                                                                        |
| Map3k5             | mitogen activated<br>protein kinase<br>kinase kinase 5                           | XM_981337        | -0.664                                                  | 0.281                                                     | 0.0000                                           | 0.0000                                                                      | 0.0004                                                                        |
| Mctp2              | NA                                                                               | XM_978331        | -0.515                                                  | 0.116                                                     | 0.0000                                           | 0.0000                                                                      | 0.3979                                                                        |
| Mef2c              | myocyte enhancer<br>factor 2C                                                    | BC026841         | -0.543                                                  | 0.433                                                     | 0.0000                                           | 0.0000                                                                      | 0.0000                                                                        |
| Mep1b              | meprin 1 beta                                                                    | NM_008586        | -0.288                                                  | 0.173                                                     | 0.0450                                           | 0.0879                                                                      | 0.3132                                                                        |
| Mfsd4              | NA                                                                               | NM_172510        | -0.305                                                  | 0.231                                                     | 0.0001                                           | 0.0016                                                                      | 0.0248                                                                        |
| Mkl2               | MKL/myocardin-<br>like 2                                                         | NM_153588        | -0.291                                                  | 0.205                                                     | 0.0000                                           | 0.0000                                                                      | 0.0000                                                                        |
| Mpdz               | multiple PDZ<br>domain protein                                                   | BC043464         | -0.347                                                  | 0.139                                                     | 0.0000                                           | 0.0000                                                                      | 0.0001                                                                        |
| Mpped1             | NA                                                                               | AK159045         | -0.187                                                  | 0.400                                                     | 0.0000                                           | 0.0521                                                                      | 0.0001                                                                        |
| Mreg               | NA                                                                               | AY628210         | -0.249                                                  | 0.371                                                     | 0.0160                                           | 0.1910                                                                      | 0.0562                                                                        |
| Mrvi1              | MRV integration<br>site 1                                                        | NM_010826        | -0.360                                                  | 0.193                                                     | 0.0000                                           | 0.0002                                                                      | 0.0017                                                                        |
| Mtus1              | mitochondrial tumor<br>suppressor 1                                              | NM_001005<br>864 | -0.434                                                  | 0.095                                                     | 0.0000                                           | 0.0000                                                                      | 0.2346                                                                        |
| Mup4               | major urinary<br>protein 4                                                       | NM_008648        | -0.377                                                  | 0.395                                                     | 0.0500                                           | 0.3905                                                                      | 0.0768                                                                        |
| Myo1b              | myosin IB                                                                        | NM_010863        | -0.407                                                  | 0.299                                                     | 0.0000                                           | 0.0000                                                                      | 0.0000                                                                        |
| Nanog              | Nanog homeobox                                                                   | NM_028016        | -0.436                                                  | 0.151                                                     | 0.0310                                           | 0.0505                                                                      | 0.3570                                                                        |

**Table S2.** Continued.

| <b>Gene Symbol</b> | <b>Gene Name</b>                                                            | <b>Entrez ID</b> | <b>Fold Change<br/><i>MECP2</i>-<br/>Tg over<br/>WT</b> | <b>Fold Change<br/><i>Mecp2</i>-<br/>null over<br/>WT</b> | <b>FDR-<br/>adjusted<br/>p-value<br/>(Total)</b> | <b>FDR-<br/>adjusted<br/>p-value<br/>(<i>MECP2</i>-<br/>Tg over<br/>WT)</b> | <b>FDR-<br/>adjusted<br/>p-value<br/>(<i>Mecp2</i>-<br/>null over<br/>WT)</b> |
|--------------------|-----------------------------------------------------------------------------|------------------|---------------------------------------------------------|-----------------------------------------------------------|--------------------------------------------------|-----------------------------------------------------------------------------|-------------------------------------------------------------------------------|
| Nedd4l             | neural precursor cell expressed, developmentally down-regulated gene 4-like | NM_031881        | -0.348                                                  | 0.146                                                     | 0.0000                                           | 0.0000                                                                      | 0.0000                                                                        |
| Negr1              | neuronal growth regulator 1                                                 | NM_001039094     | -0.234                                                  | 0.185                                                     | 0.0000                                           | 0.0000                                                                      | 0.0001                                                                        |
| Neil3              | nei like 3 (E. coli)                                                        | AK042059         | -0.070                                                  | 0.397                                                     | 0.0285                                           | 0.7687                                                                      | 0.0159                                                                        |
| Nexn               | nexilin                                                                     | AK162232         | -0.582                                                  | 0.128                                                     | 0.0020                                           | 0.0010                                                                      | 0.6522                                                                        |
| Ngfb               | nerve growth factor, beta                                                   | NM_013609        | -0.795                                                  | 0.385                                                     | 0.0038                                           | 0.0116                                                                      | 0.2034                                                                        |
| Nos1               | nitric oxide synthase 1, neuronal                                           | NM_008712        | -0.296                                                  | 0.191                                                     | 0.0000                                           | 0.0000                                                                      | 0.0000                                                                        |
| Nos1ap             | nitric oxide synthase 1 (neuronal) adaptor protein                          | AK122290         | -0.248                                                  | 0.235                                                     | 0.0001                                           | 0.0981                                                                      | 0.0004                                                                        |
| Nphs2              | nephrosis 2 homolog, podocin (human)                                        | NM_130456        | -0.120                                                  | 0.436                                                     | 0.0404                                           | 0.5519                                                                      | 0.0390                                                                        |
| Npnt               | nephronectin                                                                | AF397008         | -0.277                                                  | 0.368                                                     | 0.0000                                           | 0.0144                                                                      | 0.0000                                                                        |
| Odz3               | odd Oz/ten-m homolog 3 (Drosophila)                                         | NM_011857        | -0.599                                                  | 0.372                                                     | 0.0000                                           | 0.0000                                                                      | 0.0000                                                                        |
| Olfm3              | olfactomedin 3                                                              | NM_153157        | -0.451                                                  | 0.137                                                     | 0.0009                                           | 0.0030                                                                      | 0.1896                                                                        |
| Olf1038            | NA                                                                          | NM_147013        | -0.577                                                  | 0.153                                                     | 0.0391                                           | 0.0157                                                                      | 0.8363                                                                        |
| Olf161             | NA                                                                          | NM_146860        | -0.367                                                  | 0.400                                                     | 0.0139                                           | 0.0669                                                                      | 0.1430                                                                        |
| Olf225             | NA                                                                          | NM_001011740     | -0.591                                                  | 0.792                                                     | 0.0465                                           | 0.4640                                                                      | 0.0570                                                                        |
| Olr1               | oxidized low density lipoprotein (lectin-like) receptor 1                   | NM_138648        | -0.202                                                  | 0.460                                                     | 0.0089                                           | 0.3832                                                                      | 0.0133                                                                        |
| Osbp13             | oxysterol binding protein-like 3                                            | NM_027881        | -0.492                                                  | 0.409                                                     | 0.0000                                           | 0.0000                                                                      | 0.0000                                                                        |
| Padi2              | peptidyl arginine deiminase, type II                                        | XM_001004735     | -0.232                                                  | 0.194                                                     | 0.0028                                           | 0.0087                                                                      | 0.1965                                                                        |
| Pax1               | paired box gene 1                                                           | AB080657         | -0.350                                                  | 0.153                                                     | 0.0074                                           | 0.0136                                                                      | 0.3133                                                                        |
| Pcdh9              | protocadherin 9                                                             | XM_001003348     | -0.301                                                  | 0.131                                                     | 0.0191                                           | 0.0585                                                                      | 0.2115                                                                        |
| Pcolce2            | procollagen C-endopeptidase enhancer 2                                      | NM_029620        | -0.406                                                  | 0.075                                                     | 0.0004                                           | 0.0002                                                                      | 0.6682                                                                        |

**Table S2.** Continued.

| <b>Gene Symbol</b> | <b>Gene Name</b>                                                              | <b>Entrez ID</b> | <b>Fold Change<br/><i>MECP2</i>-<br/>Tg over<br/>WT</b> | <b>Fold Change<br/><i>Mecp2</i>-<br/>null over<br/>WT</b> | <b>FDR-<br/>adjusted<br/>p-value<br/>(Total)</b> | <b>FDR-<br/>adjusted<br/>p-value<br/>(<i>MECP2</i>-<br/>Tg over<br/>WT)</b> | <b>FDR-<br/>adjusted<br/>p-value<br/>(<i>Mecp2</i>-<br/>null over<br/>WT)</b> |
|--------------------|-------------------------------------------------------------------------------|------------------|---------------------------------------------------------|-----------------------------------------------------------|--------------------------------------------------|-----------------------------------------------------------------------------|-------------------------------------------------------------------------------|
| Pde3a              | phosphodiesterase 3A, cGMP inhibited                                          | AK042725         | -0.246                                                  | 0.355                                                     | 0.0000                                           | 0.0435                                                                      | 0.0001                                                                        |
| Pde7b              | phosphodiesterase 7B                                                          | NM_013875        | -0.358                                                  | 0.292                                                     | 0.0000                                           | 0.0000                                                                      | 0.0000                                                                        |
| Pdlim5             | PDZ and LIM domain 5                                                          | XM_976375        | -0.262                                                  | 0.141                                                     | 0.0000                                           | 0.0006                                                                      | 0.0267                                                                        |
| Phactr1            | phosphatase and actin regulator 1                                             | BC025873         | -0.321                                                  | 0.203                                                     | 0.0000                                           | 0.0000                                                                      | 0.0064                                                                        |
| Pip5k1a            | phosphatidylinositol -4-phosphate 5-kinase, type 1 alpha                      | NM_008846        | -0.227                                                  | 0.319                                                     | 0.0000                                           | 0.0034                                                                      | 0.0000                                                                        |
| Pkd2l1             | polycystic kidney disease 2-like 1                                            | NM_181422        | -0.357                                                  | 0.146                                                     | 0.0036                                           | 0.0077                                                                      | 0.2645                                                                        |
| Pla2g4f            | NA                                                                            | NM_001024145     | -0.143                                                  | 0.262                                                     | 0.0144                                           | 0.3618                                                                      | 0.0239                                                                        |
| Plagl1             | pleiomorphic adenoma gene-like 1                                              | BC065150         | -0.353                                                  | 0.311                                                     | 0.0001                                           | 0.0190                                                                      | 0.0032                                                                        |
| Plcb1              | phospholipase C, beta 1                                                       | AK129166         | -0.349                                                  | 0.327                                                     | 0.0000                                           | 0.0000                                                                      | 0.0000                                                                        |
| Plcb4              | phospholipase C, beta 4                                                       | AK080865         | -0.499                                                  | 0.124                                                     | 0.0000                                           | 0.0000                                                                      | 0.0042                                                                        |
| Plcl4              | NA                                                                            | NM_175556        | -0.133                                                  | 0.354                                                     | 0.0000                                           | 0.0056                                                                      | 0.0000                                                                        |
| Pld5               | NA                                                                            | BC100428         | -0.212                                                  | 0.224                                                     | 0.0004                                           | 0.0418                                                                      | 0.0070                                                                        |
| Plekhg1            | pleckstrin homology domain containing, family G (with RhoGef domain) member 1 | AK034403         | -0.633                                                  | 0.202                                                     | 0.0000                                           | 0.0000                                                                      | 0.0000                                                                        |
| Pou6f2             | POU domain, class 6, transcription factor 2                                   | BC094915         | -0.375                                                  | 0.337                                                     | 0.0000                                           | 0.0068                                                                      | 0.0027                                                                        |
| Ppargc1a           | peroxisome proliferative activated receptor, gamma, coactivator 1 alpha       | NM_008904        | -0.401                                                  | 0.163                                                     | 0.0000                                           | 0.0001                                                                      | 0.0086                                                                        |
| Ppm1l              | protein phosphatase 1 (formerly 2C)-like                                      | NM_178726        | -0.291                                                  | 0.231                                                     | 0.0000                                           | 0.0521                                                                      | 0.0000                                                                        |
| Prkca              | protein kinase C, alpha                                                       | NM_011101        | -0.334                                                  | 0.440                                                     | 0.0000                                           | 0.0000                                                                      | 0.0000                                                                        |
| Prkcd              | protein kinase C, delta                                                       | AB201454         | -0.285                                                  | 0.236                                                     | 0.0000                                           | 0.0000                                                                      | 0.0000                                                                        |

**Table S2.** Continued.

| <b>Gene Symbol</b> | <b>Gene Name</b>                                       | <b>Entrez ID</b> | <b>Fold Change<br/><i>MECP2</i>-<br/>Tg over<br/>WT</b> | <b>Fold Change<br/><i>Mecp2</i>-<br/>null over<br/>WT</b> | <b>FDR-<br/>adjusted<br/>p-value<br/>(Total)</b> | <b>FDR-<br/>adjusted<br/>p-value<br/>(<i>MECP2</i>-<br/>Tg over<br/>WT)</b> | <b>FDR-<br/>adjusted<br/>p-value<br/>(<i>Mecp2</i>-<br/>null over<br/>WT)</b> |
|--------------------|--------------------------------------------------------|------------------|---------------------------------------------------------|-----------------------------------------------------------|--------------------------------------------------|-----------------------------------------------------------------------------|-------------------------------------------------------------------------------|
| Prkce              | protein kinase C, epsilon                              | NM_011104        | -0.425                                                  | 0.262                                                     | 0.0000                                           | 0.0000                                                                      | 0.0000                                                                        |
| Prkg1              | protein kinase, cGMP-dependent, type I                 | NM_001013833     | -0.246                                                  | 0.207                                                     | 0.0001                                           | 0.0034                                                                      | 0.0123                                                                        |
| Prox1              | prospero-related homeobox 1                            | NM_008937        | -0.280                                                  | 0.142                                                     | 0.0278                                           | 0.0933                                                                      | 0.1943                                                                        |
| Ptprg              | protein tyrosine phosphatase, receptor type, G         | XM_976892        | -0.314                                                  | 0.181                                                     | 0.0000                                           | 0.0000                                                                      | 0.0000                                                                        |
| Ptprk              | protein tyrosine phosphatase, receptor type, K         | NM_008983        | -0.209                                                  | 0.221                                                     | 0.0000                                           | 0.0000                                                                      | 0.0000                                                                        |
| Ptpm               | protein tyrosine phosphatase, receptor type, M         | NM_008984        | -0.449                                                  | 0.299                                                     | 0.0000                                           | 0.0000                                                                      | 0.0000                                                                        |
| Pvalb              | parvalbumin                                            | NM_013645        | -0.980                                                  | 0.273                                                     | 0.0000                                           | 0.0012                                                                      | 0.0260                                                                        |
| Pvt1               | plasmacytoma variant translocation 1                   | AK144873         | -0.421                                                  | 0.140                                                     | 0.0017                                           | 0.0082                                                                      | 0.1345                                                                        |
| Pygm               | muscle glycogen phosphorylase                          | NM_011224        | -0.458                                                  | 0.131                                                     | 0.0000                                           | 0.0000                                                                      | 0.0000                                                                        |
| Rab37              | RAB37, member of RAS oncogene family                   | NM_021411        | -0.420                                                  | 0.120                                                     | 0.0000                                           | 0.0000                                                                      | 0.3100                                                                        |
| Rasgef1b           | RasGEF domain family, member 1B                        | NM_181318        | -0.367                                                  | 0.338                                                     | 0.0000                                           | 0.0000                                                                      | 0.0000                                                                        |
| Rasgrp1            | RAS guanyl releasing protein 1                         | AK013548         | -0.407                                                  | 0.209                                                     | 0.0000                                           | 0.0000                                                                      | 0.0000                                                                        |
| Rassf3             | Ras association (RalGDS/AF-6) domain family 3          | NM_138956        | -0.401                                                  | 0.306                                                     | 0.0005                                           | 0.0125                                                                      | 0.0300                                                                        |
| Rbms3              | RNA binding motif, single stranded interacting protein | AK041098         | -0.786                                                  | 0.314                                                     | 0.0000                                           | 0.0000                                                                      | 0.0000                                                                        |
| Reln               | reelin                                                 | NM_011261        | -0.260                                                  | 0.162                                                     | 0.0000                                           | 0.0000                                                                      | 0.0000                                                                        |
| Rerg               | RAS-like, estrogen-regulated, growth-inhibitor         | AK133734         | -0.339                                                  | 0.252                                                     | 0.0018                                           | 0.0339                                                                      | 0.0406                                                                        |
| Rfpl4              | ret finger protein-like 4                              | AK136022         | -0.338                                                  | 0.121                                                     | 0.0359                                           | 0.0221                                                                      | 0.6712                                                                        |
| Rgs5               | regulator of G-protein signaling 5                     | U67188           | -0.525                                                  | 0.028                                                     | 0.0000                                           | 0.0000                                                                      | 0.9064                                                                        |

**Table S2.** Continued.

| <b>Gene Symbol</b> | <b>Gene Name</b>                                                                                                                            | <b>Entrez ID</b> | <b>Fold Change<br/><i>MECP2</i>-<br/>Tg over<br/>WT</b> | <b>Fold Change<br/><i>Mecp2</i>-<br/>null over<br/>WT</b> | <b>FDR-<br/>adjusted<br/>p-value<br/>(Total)</b> | <b>FDR-<br/>adjusted<br/>p-value<br/>(<i>MECP2</i>-<br/>Tg over<br/>WT)</b> | <b>FDR-<br/>adjusted<br/>p-value<br/>(<i>Mecp2</i>-<br/>null over<br/>WT)</b> |
|--------------------|---------------------------------------------------------------------------------------------------------------------------------------------|------------------|---------------------------------------------------------|-----------------------------------------------------------|--------------------------------------------------|-----------------------------------------------------------------------------|-------------------------------------------------------------------------------|
| Rnd3               | Rho family GTPase 3                                                                                                                         | AK048635         | -0.254                                                  | 0.241                                                     | 0.0415                                           | 0.0740                                                                      | 0.3361                                                                        |
| Rnf182             | ring finger protein 182                                                                                                                     | NM_183204        | -0.295                                                  | 0.451                                                     | 0.0478                                           | 0.1283                                                                      | 0.2358                                                                        |
| Robo2              | roundabout homolog 2 (Drosophila)                                                                                                           | NM_175549        | -0.337                                                  | 0.115                                                     | 0.0000                                           | 0.0000                                                                      | 0.0078                                                                        |
| Ror1               | receptor tyrosine kinase-like orphan receptor 1                                                                                             | NM_013845        | -0.205                                                  | 0.350                                                     | 0.0033                                           | 0.2677                                                                      | 0.0077                                                                        |
| Rora               | RAR-related orphan receptor alpha                                                                                                           | XM_903197        | -0.375                                                  | 0.295                                                     | 0.0000                                           | 0.0000                                                                      | 0.0000                                                                        |
| Rps6ka5            | ribosomal protein S6 kinase, polypeptide 5                                                                                                  | AK030051         | -0.333                                                  | 0.170                                                     | 0.0000                                           | 0.0002                                                                      | 0.0005                                                                        |
| Rreb1              | NA                                                                                                                                          | NM_001013392     | -0.666                                                  | 0.685                                                     | 0.0000                                           | 0.0000                                                                      | 0.0000                                                                        |
| Runx2              | runt related transcription factor2                                                                                                          | AF005936         | -0.231                                                  | 0.323                                                     | 0.0047                                           | 0.2891                                                                      | 0.0100                                                                        |
| Runx3              | runt related transcription factor3                                                                                                          | NM_019732        | -0.276                                                  | 0.164                                                     | 0.0222                                           | 0.0460                                                                      | 0.2969                                                                        |
| Ryr2               | ryanodine receptor 2, cardiac                                                                                                               | NM_023868        | -0.296                                                  | 0.280                                                     | 0.0000                                           | 0.0000                                                                      | 0.0000                                                                        |
| Satb1              | special AT-rich sequence binding protein 1                                                                                                  | AK040502         | -0.375                                                  | 0.270                                                     | 0.0000                                           | 0.0001                                                                      | 0.0000                                                                        |
| Sdk1               | sidekick homolog 1 (chicken)                                                                                                                | AK030635         | -0.355                                                  | 0.554                                                     | 0.0000                                           | 0.0000                                                                      | 0.0000                                                                        |
| Sema3e             | sema domain, immunoglobulin domain (Ig), short basic domain, secreted, (semaphorin) 3E                                                      | NM_011348        | -0.305                                                  | 0.115                                                     | 0.0079                                           | 0.0106                                                                      | 0.3849                                                                        |
| Sema5a             | sema domain, seven thrombospondin repeats (type 1 and type 1-like), transmembrane domain (TM) and short cytoplasmic domain, (semaphorin) 5A | AK043386         | -0.401                                                  | 0.468                                                     | 0.0000                                           | 0.0000                                                                      | 0.0000                                                                        |



**Table S2.** Continued.

| <b>Gene Symbol</b> | <b>Gene Name</b>                                                                             | <b>Entrez ID</b> | <b>Fold Change<br/><i>MECP2</i>-<br/>Tg over<br/>WT</b> | <b>Fold Change<br/><i>Mecp2</i>-<br/>null over<br/>WT</b> | <b>FDR-<br/>adjusted<br/>p-value<br/>(Total)</b> | <b>FDR-<br/>adjusted<br/>p-value<br/>(<i>MECP2</i>-<br/>Tg over<br/>WT)</b> | <b>FDR-<br/>adjusted<br/>p-value<br/>(<i>Mecp2</i>-<br/>null over<br/>WT)</b> |
|--------------------|----------------------------------------------------------------------------------------------|------------------|---------------------------------------------------------|-----------------------------------------------------------|--------------------------------------------------|-----------------------------------------------------------------------------|-------------------------------------------------------------------------------|
| Sftpa1             | surfactant associated protein A1                                                             | NM_023134        | -0.429                                                  | 0.312                                                     | 0.0054                                           | 0.0360                                                                      | 0.1072                                                                        |
| Shbg               | sex hormone binding globulin                                                                 | NM_011367        | -0.275                                                  | 0.399                                                     | 0.0152                                           | 0.1214                                                                      | 0.0870                                                                        |
| Shc3               | src homology 2 domain-containing transforming protein C3                                     | NM_009167        | -0.327                                                  | 0.117                                                     | 0.0000                                           | 0.0000                                                                      | 0.0010                                                                        |
| Sipa111            | signal-induced proliferation-associated 1 like 1                                             | AK051853         | -0.182                                                  | 0.308                                                     | 0.0000                                           | 0.0011                                                                      | 0.0000                                                                        |
| Slc24a2            | solute carrier family 24 (sodium/potassium/calcium exchanger), member 2                      | AK038800         | -0.389                                                  | 0.121                                                     | 0.0000                                           | 0.0000                                                                      | 0.0646                                                                        |
| Slc25a13           | solute carrier family 25 (mitochondrial carrier, adenine nucleotide translocator), member 13 | NM_015829        | -0.402                                                  | 0.101                                                     | 0.0000                                           | 0.0000                                                                      | 0.2666                                                                        |
| Slc25a37           | solute carrier family 25, member 37                                                          | AK021203         | -0.449                                                  | 0.146                                                     | 0.0391                                           | 0.0286                                                                      | 0.6142                                                                        |
| Slc26a3            | solute carrier family 26, member 3                                                           | XM_988690        | -0.290                                                  | 0.190                                                     | 0.0092                                           | 0.0328                                                                      | 0.1862                                                                        |
| Slc2a13            | NA                                                                                           | NM_001033633     | -0.363                                                  | 0.294                                                     | 0.0000                                           | 0.0000                                                                      | 0.0000                                                                        |
| Slc4a1             | solute carrier family 4 (anion exchanger), member 1                                          | NM_011403        | -0.229                                                  | 0.242                                                     | 0.0030                                           | 0.1514                                                                      | 0.0136                                                                        |
| Slit3              | slit homolog 3 ( <i>Drosophila</i> )                                                         | NM_011412        | -0.538                                                  | 0.611                                                     | 0.0000                                           | 0.0000                                                                      | 0.0000                                                                        |
| Smoc2              | SPARC related modular calcium binding 2                                                      | AK040109         | -0.205                                                  | 0.314                                                     | 0.0030                                           | 0.0534                                                                      | 0.0432                                                                        |
| Sorbs2             | NA                                                                                           | XM_919733        | -0.394                                                  | 0.124                                                     | 0.0000                                           | 0.0000                                                                      | 0.0045                                                                        |
| Sorl1              | sortilin-related receptor, LDLR class A repeats-containing                                   | AK029071         | -0.246                                                  | 0.189                                                     | 0.0000                                           | 0.0000                                                                      | 0.0000                                                                        |
| Sox5               | SRY-box containing gene 5                                                                    | AK087772         | -0.374                                                  | 0.177                                                     | 0.0000                                           | 0.0001                                                                      | 0.0246                                                                        |

**Table S2.** Continued.

| <b>Gene Symbol</b> | <b>Gene Name</b>                                                                                             | <b>Entrez ID</b> | <b>Fold Change<br/><i>MECP2</i>-<br/>Tg over<br/>WT</b> | <b>Fold Change<br/><i>Mecp2</i>-<br/>null over<br/>WT</b> | <b>FDR-<br/>adjusted<br/>p-value<br/>(Total)</b> | <b>FDR-<br/>adjusted<br/>p-value<br/>(<i>MECP2</i>-<br/>Tg over<br/>WT)</b> | <b>FDR-<br/>adjusted<br/>p-value<br/>(<i>Mecp2</i>-<br/>null over<br/>WT)</b> |
|--------------------|--------------------------------------------------------------------------------------------------------------|------------------|---------------------------------------------------------|-----------------------------------------------------------|--------------------------------------------------|-----------------------------------------------------------------------------|-------------------------------------------------------------------------------|
| Spag4l             | sperm associated antigen 4-like                                                                              | XM_975479        | -0.350                                                  | 0.535                                                     | 0.0003                                           | 0.1755                                                                      | 0.0013                                                                        |
| Spdyb              | NA                                                                                                           | AK015441         | -0.132                                                  | 0.318                                                     | 0.0178                                           | 0.2953                                                                      | 0.0378                                                                        |
| Spnb1              | spectrin beta 1                                                                                              | NM_013675        | -0.260                                                  | 0.250                                                     | 0.0000                                           | 0.0000                                                                      | 0.0000                                                                        |
| Spock1             | sparc/osteonectin, cwcv and kazal-like domains proteoglycan 1                                                | NM_009262        | -0.321                                                  | 0.201                                                     | 0.0000                                           | 0.0001                                                                      | 0.0000                                                                        |
| Ssbp2              | single-stranded DNA binding protein 2                                                                        | AK005150         | -0.248                                                  | 0.180                                                     | 0.0000                                           | 0.0000                                                                      | 0.0000                                                                        |
| St6galnac5         | ST6 (alpha-N-acetylneuraminyl-2,3-beta-galactosyl-1,3)-N-acetylgalactosaminide alpha-2,6-sialyltransferase 5 | NM_012028        | -0.360                                                  | 0.354                                                     | 0.0000                                           | 0.0011                                                                      | 0.0076                                                                        |
| Steap2             | six transmembrane epithelial antigen of prostate 2                                                           | BC043459         | -0.455                                                  | 0.148                                                     | 0.0000                                           | 0.0001                                                                      | 0.1506                                                                        |
| Syngr4             | synaptogyrin 4                                                                                               | XM_001003608     | -0.506                                                  | 0.265                                                     | 0.0029                                           | 0.0075                                                                      | 0.2238                                                                        |
| Synj2              | synaptojanin 2                                                                                               | AF026123         | -0.405                                                  | 0.107                                                     | 0.0000                                           | 0.0000                                                                      | 0.0049                                                                        |
| Syt2               | synaptotagmin II                                                                                             | NM_009307        | -0.329                                                  | 0.127                                                     | 0.0003                                           | 0.0006                                                                      | 0.2435                                                                        |
| Tanc1              | NA                                                                                                           | AK030022         | -0.224                                                  | 0.252                                                     | 0.0000                                           | 0.0000                                                                      | 0.0000                                                                        |
| Tcf4               | transcription factor4                                                                                        | AK014343         | -0.239                                                  | 0.328                                                     | 0.0000                                           | 0.0001                                                                      | 0.0000                                                                        |
| Tcfcp211           | transcription factor CP2-like 1                                                                              | NM_023755        | -0.256                                                  | 0.213                                                     | 0.0044                                           | 0.0419                                                                      | 0.0776                                                                        |
| Tera               | NA                                                                                                           | NM_019643        | -0.565                                                  | 0.444                                                     | 0.0000                                           | 0.0011                                                                      | 0.0014                                                                        |
| Tgfbr3             | transforming growth factor, beta receptor III                                                                | AK133234         | -0.291                                                  | 0.172                                                     | 0.0000                                           | 0.0002                                                                      | 0.0109                                                                        |
| Tiam1              | T-cell lymphoma invasion and metastasis 1                                                                    | AK136856         | -0.425                                                  | 0.288                                                     | 0.0000                                           | 0.0000                                                                      | 0.0000                                                                        |
| Tmem16b            | NA                                                                                                           | AK044763         | -0.179                                                  | 0.233                                                     | 0.0062                                           | 0.1302                                                                      | 0.0342                                                                        |
| Tmprss4            | transmembrane protease, serine 4                                                                             | NM_145403        | -0.354                                                  | 0.134                                                     | 0.0019                                           | 0.0019                                                                      | 0.4328                                                                        |

**Table S2.** Continued.

| <b>Gene Symbol</b> | <b>Gene Name</b>                                       | <b>Entrez ID</b> | <b>Fold Change<br/><i>MECP2</i>-<br/>Tg over<br/>WT</b> | <b>Fold Change<br/><i>Mecp2</i>-<br/>null over<br/>WT</b> | <b>FDR-<br/>adjusted<br/>p-value<br/>(Total)</b> | <b>FDR-<br/>adjusted<br/>p-value<br/>(<i>MECP2</i>-<br/>Tg over<br/>WT)</b> | <b>FDR-<br/>adjusted<br/>p-value<br/>(<i>Mecp2</i>-<br/>null over<br/>WT)</b> |
|--------------------|--------------------------------------------------------|------------------|---------------------------------------------------------|-----------------------------------------------------------|--------------------------------------------------|-----------------------------------------------------------------------------|-------------------------------------------------------------------------------|
| Tnfrsf11a          | tumor necrosis factor receptor superfamily, member 11a | NM_009399        | -0.334                                                  | 0.137                                                     | 0.0002                                           | 0.0002                                                                      | 0.3897                                                                        |
| Trps1              | trichorhinophalangeal syndrome I (human)               | XM_987804        | -0.270                                                  | 0.144                                                     | 0.0089                                           | 0.0669                                                                      | 0.0951                                                                        |
| Tshz1              | NA                                                     | XM_917016        | -0.204                                                  | 0.283                                                     | 0.0020                                           | 0.1013                                                                      | 0.0147                                                                        |
| Tshz2              | NA                                                     | AK220569         | -0.586                                                  | 0.256                                                     | 0.0001                                           | 0.0006                                                                      | 0.1167                                                                        |
| Tshz3              | NA                                                     | NM_172298        | -0.305                                                  | 0.314                                                     | 0.0037                                           | 0.0419                                                                      | 0.0659                                                                        |
| Tspan5             | tetraspanin 5                                          | XM_987462        | -0.309                                                  | 0.295                                                     | 0.0000                                           | 0.0001                                                                      | 0.0000                                                                        |
| Unc5d              | unc-5 homolog D (C. elegans)                           | NM_153135        | -0.206                                                  | 0.358                                                     | 0.0000                                           | 0.0007                                                                      | 0.0000                                                                        |
| Vamp1              | vesicle-associated membrane protein 1                  | BC057587         | -0.440                                                  | 0.159                                                     | 0.0000                                           | 0.0001                                                                      | 0.0373                                                                        |
| Wwc2               | NA                                                     | NM_133791        | -0.395                                                  | 0.214                                                     | 0.0000                                           | 0.0000                                                                      | 0.0000                                                                        |
| Zfp516             | zinc finger protein 516                                | NM_183033        | -0.237                                                  | 0.221                                                     | 0.0005                                           | 0.0539                                                                      | 0.0081                                                                        |
| Zfp521             | zinc finger protein 521                                | NM_145492        | -0.306                                                  | 0.213                                                     | 0.0003                                           | 0.0092                                                                      | 0.0295                                                                        |
| Zfp533             | zinc finger protein 533                                | AK033075         | -0.543                                                  | 0.320                                                     | 0.0000                                           | 0.0000                                                                      | 0.0000                                                                        |
| Zfp804a            | NA                                                     | BC035535         | -0.418                                                  | 0.080                                                     | 0.0023                                           | 0.0013                                                                      | 0.6289                                                                        |
| Zfpm2              | zinc finger protein, multitype 2                       | NM_011766        | -0.073                                                  | 0.364                                                     | 0.0032                                           | 0.7437                                                                      | 0.0016                                                                        |

**Table S3.** The list of genes that are upregulated in both *MECP2*-Tg and *Mecp2*-null mouse hypothalami (FDR-adjusted p-value < 0.05).

| Gene Symbol   | Gene Name                                                                                     | Entrez ID | Fold Change <i>MECP2</i> -Tg over WT | Fold Change <i>Mecp2</i> -null over WT | FDR-adjusted p-value (Total) | FDR-adjusted p-value ( <i>MECP2</i> -Tg over WT) | FDR-adjusted p-value ( <i>Mecp2</i> -null over WT) |
|---------------|-----------------------------------------------------------------------------------------------|-----------|--------------------------------------|----------------------------------------|------------------------------|--------------------------------------------------|----------------------------------------------------|
| 9030625A04Rik | RIKEN cDNA 9030625A04 gene                                                                    | AK053693  | 0.430                                | 0.324                                  | 0.0066                       | 0.0424                                           | 0.1125                                             |
| Atp5a1        | ATP synthase, H <sup>+</sup> transporting, mitochondrial F1 complex, alpha subunit, isoform 1 | NM_007505 | 0.274                                | 0.050                                  | 0.0000                       | 0.0001                                           | 0.1375                                             |
| Bai1          | brain-specific angiogenesis inhibitor 1                                                       | AK046831  | 0.228                                | 0.073                                  | 0.0000                       | 0.0000                                           | 0.0022                                             |
| Calcr         | calcitonin receptor                                                                           | NM_007588 | 0.213                                | 0.238                                  | 0.0004                       | 0.0576                                           | 0.0057                                             |
| Chrna7        | cholinergic receptor, nicotinic, alpha polypeptide 7                                          | NM_007390 | 0.256                                | 0.170                                  | 0.0005                       | 0.0050                                           | 0.0730                                             |
| LOC621446     | NA                                                                                            | NM_010879 | 0.238                                | 0.217                                  | 0.0249                       | 0.1194                                           | 0.1404                                             |
| Rxrb          | retinoid X receptor beta                                                                      | BC019432  | 0.276                                | 0.091                                  | 0.0119                       | 0.0568                                           | 0.1435                                             |
| Slc24a3       | solute carrier family 24 (sodium/potassium/calcium exchanger), member 3                       | AF314821  | 0.207                                | 0.051                                  | 0.0000                       | 0.0000                                           | 0.1299                                             |
| Spnb3         | spectrin beta 3                                                                               | NM_021287 | 0.222                                | 0.092                                  | 0.0000                       | 0.0000                                           | 0.0382                                             |

**Table S4.** The list of genes that are downregulated in both *MECP2*-Tg and *Mecp2*-null mouse hypothalami (FDR-adjusted p-value < 0.05).

| <b>Gene Symbol</b> | <b>Gene Name</b>                                                     | <b>Entrez ID</b> | <b>Fold Change<br/><i>MECP2</i>-<br/>Tg over<br/>WT</b> | <b>Fold Change<br/><i>Mecp2</i>-<br/>null over<br/>WT</b> | <b>FDR-<br/>adjusted<br/>p-value<br/>(Total)</b> | <b>FDR-<br/>adjusted<br/>p-value<br/>(<i>MECP2</i>-<br/>Tg over<br/>WT)</b> | <b>FDR-<br/>adjusted<br/>p-value<br/>(<i>Mecp2</i>-<br/>null over<br/>WT)</b> |
|--------------------|----------------------------------------------------------------------|------------------|---------------------------------------------------------|-----------------------------------------------------------|--------------------------------------------------|-----------------------------------------------------------------------------|-------------------------------------------------------------------------------|
| 2900073C16Rik      | NA                                                                   | AK013770         | -0.957                                                  | -0.481                                                    | 0.0175                                           | 0.1273                                                                      | 0.0944                                                                        |
| 9030617O03Rik      | RIKEN cDNA<br>9030617O03<br>gene                                     | BC021385         | -0.200                                                  | -0.250                                                    | 0.0010                                           | 0.1168                                                                      | 0.0064                                                                        |
| B830045N13Rik      | RIKEN cDNA<br>B830045N13<br>gene                                     | AK083233         | -0.180                                                  | -0.276                                                    | 0.0000                                           | 0.0536                                                                      | 0.0001                                                                        |
| Cdk14              | cyclin-<br>dependent<br>kinase-like 4                                | NM_001033443     | -0.411                                                  | -0.244                                                    | 0.0016                                           | 0.0010                                                                      | 0.1499                                                                        |
| Eltf1              | EGF, latrophilin<br>seven<br>transmembrane<br>domain<br>containing 1 | NM_133222        | -0.283                                                  | -0.244                                                    | 0.0000                                           | 0.0031                                                                      | 0.0021                                                                        |
| Mak                | male germ cell-<br>associated<br>kinase                              | BC050009         | -0.311                                                  | -0.280                                                    | 0.0002                                           | 0.0153                                                                      | 0.0106                                                                        |
| Nol8               | nucleolar<br>protein 8                                               | BC026402         | -0.158                                                  | -0.222                                                    | 0.0000                                           | 0.0841                                                                      | 0.0002                                                                        |
| Ret                | ret proto-<br>oncogene                                               | BC059012         | -0.155                                                  | -0.277                                                    | 0.0000                                           | 0.0422                                                                      | 0.0000                                                                        |
| Sgk                | serum/glucocort<br>icoid regulated<br>kinase                         | BC070401         | -0.329                                                  | -0.306                                                    | 0.0000                                           | 0.0010                                                                      | 0.0006                                                                        |
| St3gal6            | ST3 beta-<br>galactoside<br>alpha-2,3-<br>sialyltransferase<br>6     | BC026197         | -0.184                                                  | -0.203                                                    | 0.0160                                           | 0.1329                                                                      | 0.0829                                                                        |
| Vit                | vitrin                                                               | NM_028813        | -0.231                                                  | -0.291                                                    | 0.0010                                           | 0.0950                                                                      | 0.0081                                                                        |
| Xdh                | xanthine<br>dehydrogenase                                            | AK164764         | -0.250                                                  | -0.211                                                    | 0.0000                                           | 0.0063                                                                      | 0.0061                                                                        |

**Table S5.** The list of genes specifically misregulated in *MECP2*-Tg hypothalami (FDR-adjusted p-value < 0.05).

**Upregulated genes (940):**

| <b>Gene Symbol</b> | <b>Gene Name</b>           | <b>Entrez ID</b> | <b>Fold Change<br/><i>MECP2</i>-Tg over<br/>WT</b> | <b>FDR-adjusted<br/>p-value<br/>(<i>MECP2</i>-Tg<br/>over WT)</b> |
|--------------------|----------------------------|------------------|----------------------------------------------------|-------------------------------------------------------------------|
| 0610025P10Rik      | RIKEN cDNA 0610025P10 gene | AK002679         | 0.234                                              | 0.0000                                                            |
| 1110007C09Rik      | RIKEN cDNA 1110007C09 gene | BC047205         | 0.250                                              | 0.0089                                                            |
| 1110007L15Rik      | RIKEN cDNA 1110007L15 gene | BC019557         | 0.251                                              | 0.0143                                                            |
| 1110020G09Rik      | RIKEN cDNA 1110020G09 gene | NM_001040395     | 0.264                                              | 0.0004                                                            |
| 1110051M20Rik      | RIKEN cDNA 1110051M20 gene | BC049648         | 0.273                                              | 0.0001                                                            |
| 1110059P08Rik      | RIKEN cDNA 1110059P08 gene | AK085518         | 0.249                                              | 0.0192                                                            |
| 1200004M23Rik      | RIKEN cDNA 1200004M23 gene | NM_026169        | 0.220                                              | 0.0390                                                            |
| 1200015F23Rik      | RIKEN cDNA 1200015F23 gene | XM_980736        | 0.225                                              | 0.0006                                                            |
| 1500012F01Rik      | NA                         | XM_983517        | 0.638                                              | 0.0101                                                            |
| 1600002H07Rik      | RIKEN cDNA 1600002H07 gene | BC063767         | 0.289                                              | 0.0476                                                            |
| 1700020C11Rik      | RIKEN cDNA 1700020C11 gene | NM_026443        | 0.515                                              | 0.0017                                                            |
| 1700021K19Rik      | RIKEN cDNA 1700021K19 gene | BC037474         | 0.213                                              | 0.0000                                                            |
| 1700027J05Rik      | RIKEN cDNA 1700027J05 gene | BC030395         | 0.241                                              | 0.0000                                                            |
| 1810007P19Rik      | RIKEN cDNA 1810007P19 gene | AK007366         | 0.229                                              | 0.0372                                                            |
| 1810008A18Rik      | RIKEN cDNA 1810008A18 gene | BC022775         | 0.252                                              | 0.0389                                                            |
| 1810020D17Rik      | RIKEN cDNA 1810020D17 gene | BC062811         | 0.606                                              | 0.0129                                                            |
| 1810030O07Rik      | RIKEN cDNA 1810030O07 gene | AK085228         | 0.259                                              | 0.0195                                                            |
| 1810043G02Rik      | RIKEN cDNA 1810043G02 gene | AK153233         | 0.207                                              | 0.0149                                                            |
| 2310003L22Rik      | RIKEN cDNA 2310003L22 gene | BC005630         | 0.346                                              | 0.0466                                                            |
| 2310021P13Rik      | RIKEN cDNA 2310021P13 gene | AB093273         | 0.276                                              | 0.0000                                                            |
| 2310022B05Rik      | RIKEN cDNA 2310022B05 gene | NM_175149        | 0.313                                              | 0.0000                                                            |
| 2310035C23Rik      | RIKEN cDNA 2310035C23 gene | AK040168         | 0.211                                              | 0.0000                                                            |
| 2310044H10Rik      | RIKEN cDNA 2310044H10 gene | AY761096         | 0.242                                              | 0.0475                                                            |
| 2310066E14Rik      | RIKEN cDNA 2310066E14 gene | XM_994701        | 0.312                                              | 0.0001                                                            |
| 2400003C14Rik      | RIKEN cDNA 2400003C14 gene | AK122215         | 0.288                                              | 0.0011                                                            |
| 2600009E05Rik      | RIKEN cDNA 2600009E05 gene | NM_029832        | 0.264                                              | 0.0165                                                            |
| 2610003J06Rik      | RIKEN cDNA 2610003J06 gene | NM_028101        | 0.242                                              | 0.0090                                                            |
| 2610018I03Rik      | RIKEN cDNA 2610018I03 gene | NM_027394        | 0.221                                              | 0.0244                                                            |
| 2610019A05Rik      | RIKEN cDNA 2610019A05 gene | AK031715         | 0.252                                              | 0.0117                                                            |
| 2610027L16Rik      | RIKEN cDNA 2610027L16 gene | NM_026403        | 0.261                                              | 0.0010                                                            |
| 2610042O14Rik      | RIKEN cDNA 2610042O14 gene | AK032098         | 0.330                                              | 0.0083                                                            |
| 2610206B13Rik      | RIKEN cDNA 2610206B13 gene | NM_026047        | 0.255                                              | 0.0047                                                            |
| 2610529C04Rik      | RIKEN cDNA 2610529C04 gene | NM_025952        | 0.257                                              | 0.0429                                                            |
| 2700050L05Rik      | RIKEN cDNA 2700050L05 gene | NM_178115        | 0.295                                              | 0.0000                                                            |
| 2810050O03Rik      | NA                         | AK012940         | 0.380                                              | 0.0348                                                            |
| 2810403A07Rik      | RIKEN cDNA 2810403A07 gene | AK173057         | 0.343                                              | 0.0000                                                            |

**Table S5.** Continued.

**Upregulated genes (940):**

| <b>Gene Symbol</b> | <b>Gene Name</b>                                      | <b>Entrez ID</b> | <b>Fold Change<br/><i>MECP2</i>-Tg over<br/>WT</b> | <b>FDR-adjusted<br/>p-value<br/>(<i>MECP2</i>-Tg<br/>over WT)</b> |
|--------------------|-------------------------------------------------------|------------------|----------------------------------------------------|-------------------------------------------------------------------|
| 2810439F02Rik      | RIKEN cDNA 2810439F02 gene                            | AK005781         | 0.279                                              | 0.0232                                                            |
| 2900046G09Rik      | RIKEN cDNA 2900046G09 gene                            | NM_133778        | 0.688                                              | 0.0020                                                            |
| 4632415K11Rik      | RIKEN cDNA 4632415K11 gene                            | NM_028883        | 0.236                                              | 0.0213                                                            |
| 4833418A01Rik      | RIKEN cDNA 4833418A01 gene                            | AK079462         | 0.210                                              | 0.0292                                                            |
| 4930452B06Rik      | RIKEN cDNA 4930452B06 gene                            | NM_028934        | 0.226                                              | 0.0146                                                            |
| 4930471M23Rik      | RIKEN cDNA 4930471M23 gene                            | NM_175675        | 0.217                                              | 0.0054                                                            |
| 4930579J09Rik      | RIKEN cDNA 4930579J09 gene                            | NM_133689        | 0.219                                              | 0.0497                                                            |
| 4933417O08Rik      | RIKEN cDNA 4933417O08 gene                            | AK016850         | 0.354                                              | 0.0179                                                            |
| 4933424C08Rik      | RIKEN cDNA 4933424C08 gene                            | AK048826         | 0.660                                              | 0.0209                                                            |
| 4933428G09Rik      | RIKEN cDNA 4933428G09 gene                            | AK032498         | 0.257                                              | 0.0381                                                            |
| 5031439G07Rik      | RIKEN cDNA 5031439G07 gene                            | AK138575         | 0.239                                              | 0.0084                                                            |
| 5630401D24Rik      | RIKEN cDNA 5630401D24 gene                            | NM_144877        | 0.276                                              | 0.0333                                                            |
| 5730403B10Rik      | RIKEN cDNA 5730403B10 gene                            | AK035791         | 0.245                                              | 0.0175                                                            |
| 5730405I09Rik      | RIKEN cDNA 5730405I09 gene                            | NM_026484        | 0.227                                              | 0.0244                                                            |
| 5730410I19Rik      | RIKEN cDNA 5730410I19 gene                            | NM_025666        | 0.262                                              | 0.0108                                                            |
| 5730472N09Rik      | RIKEN cDNA 5730472N09 gene                            | AK140122         | 0.255                                              | 0.0000                                                            |
| 5730593N15Rik      | RIKEN cDNA 5730593N15 gene                            | AK019987         | 0.314                                              | 0.0085                                                            |
| 6030443O07Rik      | RIKEN cDNA 6030443O07 gene                            | AK031688         | 0.203                                              | 0.0046                                                            |
| 6330407G11Rik      | RIKEN cDNA 6330407G11 gene                            | BC096040         | 0.308                                              | 0.0282                                                            |
| 6330500D04Rik      | RIKEN cDNA 6330500D04 gene                            | AK134538         | 0.218                                              | 0.0001                                                            |
| 6330514A18Rik      | RIKEN cDNA 6330514A18 gene                            | NM_183152        | 0.249                                              | 0.0048                                                            |
| 6430598A04Rik      | RIKEN cDNA 6430598A04 gene                            | AK080821         | 0.242                                              | 0.0012                                                            |
| 6720456H20Rik      | RIKEN cDNA 6720456H20 gene                            | AK141246         | 0.218                                              | 0.0086                                                            |
| 6820408C15Rik      | RIKEN cDNA 6820408C15 gene                            | NM_177656        | 0.246                                              | 0.0379                                                            |
| 8430427H17Rik      | RIKEN cDNA 8430427H17 gene                            | AK157863         | 0.204                                              | 0.0491                                                            |
| 9030625A04Rik      | RIKEN cDNA 9030625A04 gene                            | AK053693         | 0.430                                              | 0.0424                                                            |
| 9130206N08Rik      | RIKEN cDNA 9130206N08 gene                            | BC111864         | 0.235                                              | 0.0008                                                            |
| 9130227C08Rik      | RIKEN cDNA 9130227C08 gene                            | NM_027143        | 0.224                                              | 0.0115                                                            |
| 9130404D14Rik      | RIKEN cDNA 9130404D14 gene                            | NM_146119        | 0.279                                              | 0.0075                                                            |
| A630076J17Rik      | RIKEN cDNA A630076J17 gene                            | AK080367         | 0.332                                              | 0.0474                                                            |
| A730028G07Rik      | RIKEN cDNA A730028G07 gene                            | AK042831         | 0.578                                              | 0.0340                                                            |
| Aaas               | achalasia, adrenocortical<br>insufficiency, alacrimia | BC026604         | 0.261                                              | 0.0002                                                            |
| Aarsl              | alanyl-tRNA synthetase like                           | NM_198608        | 0.212                                              | 0.0005                                                            |
| Abca17             | NA                                                    | AK031613         | 0.235                                              | 0.0072                                                            |

Table S5. Continued.

Upregulated genes (940):

| Gene Symbol | Gene Name                                                       | Entrez ID    | Fold Change<br><i>MECP2</i> -Tg over<br>WT | FDR-adjusted<br>p-value<br>( <i>MECP2</i> -Tg<br>over WT) |
|-------------|-----------------------------------------------------------------|--------------|--------------------------------------------|-----------------------------------------------------------|
| Abca7       | ATP-binding cassette, sub-family A (ABC1), member 7             | NM_013850    | 0.217                                      | 0.0000                                                    |
| Abca9       | ATP-binding cassette transporter sub-family A member 9          | NM_147220    | 0.210                                      | 0.0028                                                    |
| Abcc10      | ATP-binding cassette, sub-family C (CFTR/MRP), member 10        | NM_145140    | 0.200                                      | 0.0006                                                    |
| Abhd12      | NA                                                              | AK018261     | 0.227                                      | 0.0003                                                    |
| Abtb2       | ankyrin repeat and BTB (POZ) domain containing 2                | NM_178890    | 0.209                                      | 0.0190                                                    |
| Acot7       | acyl-CoA thioesterase 7                                         | AB088411     | 0.208                                      | 0.0073                                                    |
| Acp2        | acid phosphatase 2, lysosomal                                   | NM_007387    | 0.222                                      | 0.0010                                                    |
| Actn4       | actinin alpha 4                                                 | NM_021895    | 0.230                                      | 0.0000                                                    |
| Actr10      | ARP10 actin-related protein 10 homolog ( <i>S. cerevisiae</i> ) | AK090043     | 0.233                                      | 0.0012                                                    |
| Actr1b      | ARP1 actin-related protein 1 homolog B (yeast)                  | NM_146107    | 0.350                                      | 0.0020                                                    |
| Actr3       | ARP3 actin-related protein 3 homolog (yeast)                    | XR_002077    | 0.221                                      | 0.0017                                                    |
| Adcy6       | adenylate cyclase 6                                             | NM_007405    | 0.336                                      | 0.0000                                                    |
| Adcy8       | adenylate cyclase 8                                             | NM_009623    | 0.295                                      | 0.0000                                                    |
| Adcyap1r1   | adenylate cyclase activating polypeptide 1 receptor 1           | NM_001025372 | 0.279                                      | 0.0000                                                    |
| Adipor1     | adiponectin receptor 1                                          | NM_028320    | 0.227                                      | 0.0006                                                    |
| Adprhl2     | ADP-ribosylhydrolase like 2                                     | NM_133883    | 0.277                                      | 0.0178                                                    |
| Adsl        | adenylosuccinate lyase                                          | NM_009634    | 0.225                                      | 0.0147                                                    |
| Aebp1       | AE binding protein 1                                            | NM_009636    | 0.305                                      | 0.0001                                                    |
| Aes         | amino-terminal enhancer of split                                | X73361       | 0.270                                      | 0.0024                                                    |
| Aggf1       | angiogenic factor with G patch and FHA domains 1                | BC027286     | 0.237                                      | 0.0061                                                    |
| Agpat7      | NA                                                              | NM_207206    | 0.214                                      | 0.0023                                                    |
| Ahdcl       | AT hook, DNA binding motif, containing 1                        | AK149347     | 0.318                                      | 0.0011                                                    |
| Ak311       | adenylate kinase 3 alpha-like 1                                 | XM_992477    | 0.357                                      | 0.0308                                                    |
| Akt1        | thymoma viral proto-oncogene 1                                  | NM_009652    | 0.295                                      | 0.0000                                                    |
| Aldh1a2     | aldehyde dehydrogenase family 1, subfamily A2                   | NM_009022    | 0.562                                      | 0.0000                                                    |
| Alkbh8      | NA                                                              | AK034664     | 0.202                                      | 0.0041                                                    |
| Amfr        | autocrine motility factor receptor                              | AF124144     | 0.211                                      | 0.0004                                                    |



Table S5. Continued.

Upregulated genes (940):

| Gene Symbol | Gene Name                                                                                     | Entrez ID    | Fold Change<br><i>MECP2</i> -Tg over<br>WT | FDR-adjusted<br>p-value<br>( <i>MECP2</i> -Tg<br>over WT) |
|-------------|-----------------------------------------------------------------------------------------------|--------------|--------------------------------------------|-----------------------------------------------------------|
| Anapc2      | anaphase promoting complex subunit 2                                                          | NM_175300    | 0.300                                      | 0.0002                                                    |
| Ankmy2      | ankyrin repeat and MYND domain containing 2                                                   | AK037644     | 0.266                                      | 0.0011                                                    |
| Ankrd10     | ankyrin repeat domain 10                                                                      | NM_133971    | 0.411                                      | 0.0015                                                    |
| Ankrd13b    | ankyrin repeat domain 13b                                                                     | NM_172945    | 0.304                                      | 0.0000                                                    |
| Ankrd54     | NA                                                                                            | AK084500     | 0.408                                      | 0.0001                                                    |
| Ap1m1       | adaptor-related protein complex AP-1, mu subunit 1                                            | NM_007456    | 0.202                                      | 0.0039                                                    |
| Ap2a1       | adaptor protein complex AP-2, alpha 1 subunit                                                 | NM_001077264 | 0.303                                      | 0.0000                                                    |
| Ap2a2       | adaptor protein complex AP-2, alpha 2 subunit                                                 | NM_007459    | 0.263                                      | 0.0000                                                    |
| Apc2        | adenomatosis polyposis coli 2                                                                 | NM_011789    | 0.257                                      | 0.0000                                                    |
| Apeh        | acylpeptide hydrolase                                                                         | BC034199     | 0.257                                      | 0.0000                                                    |
| Apip        | APAF1 interacting protein                                                                     | NM_019735    | 0.353                                      | 0.0004                                                    |
| Apoa1bp     | apolipoprotein A-I binding protein                                                            | NM_144897    | 0.262                                      | 0.0142                                                    |
| Aprt        | adenine phosphoribosyl transferase                                                            | NM_009698    | 0.284                                      | 0.0245                                                    |
| Arfgap1     | ADP-ribosylation factor GTPase activating protein 1                                           | AK030520     | 0.255                                      | 0.0034                                                    |
| Arhgef10l   | Rho guanine nucleotide exchange factor (GEF) 10-like                                          | NM_172415    | 0.201                                      | 0.0001                                                    |
| Arhgef19    | Rho guanine nucleotide exchange factor (GEF) 19                                               | NM_172520    | 0.225                                      | 0.0116                                                    |
| Arl8a       | NA                                                                                            | NM_026823    | 0.239                                      | 0.0008                                                    |
| Armc1       | armadillo repeat containing 1                                                                 | XM_887464    | 0.304                                      | 0.0108                                                    |
| Armc9       | NA                                                                                            | AK164041     | 0.244                                      | 0.0000                                                    |
| Armex2      | armadillo repeat containing, X-linked 2                                                       | AK172960     | 0.251                                      | 0.0317                                                    |
| Ars2        | NA                                                                                            | NM_031405    | 0.275                                      | 0.0002                                                    |
| Asb6        | ankyrin repeat and SOCS box-containing protein 6                                              | BC085485     | 0.224                                      | 0.0415                                                    |
| Asrgl1      | asparaginase like 1                                                                           | NM_025610    | 0.237                                      | 0.0000                                                    |
| Atg10       | NA                                                                                            | NM_025770    | 0.353                                      | 0.0068                                                    |
| Atg4d       | NA                                                                                            | NM_153583    | 0.242                                      | 0.0075                                                    |
| Atp13a2     | ATPase type 13A2                                                                              | BC025028     | 0.230                                      | 0.0000                                                    |
| Atp5a1      | ATP synthase, H <sup>+</sup> transporting, mitochondrial F1 complex, alpha subunit, isoform 1 | NM_007505    | 0.274                                      | 0.0001                                                    |

Table S5. Continued.

Upregulated genes (940):

| Gene Symbol | Gene Name                                                                                | Entrez ID    | Fold Change<br><i>MECP2</i> -Tg over<br>WT | FDR-adjusted<br>p-value<br>( <i>MECP2</i> -Tg<br>over WT) |
|-------------|------------------------------------------------------------------------------------------|--------------|--------------------------------------------|-----------------------------------------------------------|
| Atp5d       | ATP synthase, H <sup>+</sup> transporting,<br>mitochondrial F1 complex, delta<br>subunit | NM_025313    | 0.271                                      | 0.0006                                                    |
| Atp6v0b     | ATPase, H <sup>+</sup> transporting, V0 subunit<br>B                                     | BC009169     | 0.321                                      | 0.0000                                                    |
| Atp6v0c     | ATPase, H <sup>+</sup> transporting, V0 subunit<br>C                                     | NM_009729    | 0.249                                      | 0.0459                                                    |
| Atp6v0d1    | ATPase, H <sup>+</sup> transporting, V0 subunit<br>D isoform 1                           | AK138796     | 0.204                                      | 0.0008                                                    |
| Atp9a       | ATPase, class II, type 9A                                                                | NM_015731    | 0.260                                      | 0.0000                                                    |
| Atxn7l3     | ataxin 7-like 3                                                                          | XM_001003471 | 0.328                                      | 0.0001                                                    |
| AU014645    | expressed sequence AU014645                                                              | AK166458     | 0.230                                      | 0.0000                                                    |
| Avil        | advillin                                                                                 | NM_009635    | 0.232                                      | 0.0210                                                    |
| Avp         | arginine vasopressin                                                                     | AK138179     | 0.909                                      | 0.0016                                                    |
| Aytl1       | NA                                                                                       | NM_173014    | 0.298                                      | 0.0015                                                    |
| Azin1       | antizyme inhibitor 1                                                                     | BC046814     | 0.209                                      | 0.0031                                                    |
| B4galnt1    | NA                                                                                       | BC022180     | 0.242                                      | 0.0025                                                    |
| B4galt3     | UDP-Gal:betaGlcNAc beta 1,4-<br>galactosyltransferase, polypeptide 3                     | AK155471     | 0.259                                      | 0.0084                                                    |
| Bace1       | beta-site APP cleaving enzyme 1                                                          | AK079814     | 0.264                                      | 0.0000                                                    |
| Bap1        | Brcal associated protein 1                                                               | NM_027088    | 0.216                                      | 0.0001                                                    |
| Bat3        | HLA-B-associated transcript 3                                                            | AK170134     | 0.243                                      | 0.0000                                                    |
| Bbs2        | Bardet-Biedl syndrome 2 homolog<br>(human)                                               | NM_026116    | 0.313                                      | 0.0003                                                    |
| BC018242    | cDNA sequence BC018242                                                                   | BC023082     | 0.248                                      | 0.0002                                                    |
| BC024868    | cDNA sequence BC024868                                                                   | NM_199149    | 0.231                                      | 0.0022                                                    |
| BC032265    | cDNA sequence BC032265                                                                   | AK078838     | 0.361                                      | 0.0000                                                    |
| BC038286    | cDNA sequence BC038286                                                                   | BC038286     | 0.304                                      | 0.0001                                                    |
| BC057552    | cDNA sequence BC057552                                                                   | NM_172502    | 0.234                                      | 0.0363                                                    |
| BC057893    | cDNA sequence BC057893                                                                   | AK089417     | 0.203                                      | 0.0146                                                    |
| Bcar1       | breast cancer anti-estrogen resistance<br>1                                              | AK079554     | 0.261                                      | 0.0180                                                    |
| Bcat2       | branched chain aminotransferase 2,<br>mitochondrial                                      | AK002831     | 0.253                                      | 0.0025                                                    |
| Bcdin3      | NA                                                                                       | NM_144913    | 0.332                                      | 0.0069                                                    |
| Bcl2l1      | Bcl2-like 1                                                                              | U51279       | 0.232                                      | 0.0224                                                    |
| Bcl9l       | B-cell CLL/lymphoma 9-like                                                               | XM_990658    | 0.242                                      | 0.0330                                                    |

Table S5. Continued.

Upregulated genes (940):

| Gene Symbol   | Gene Name                                                       | Entrez ID | Fold Change<br><i>MECP2</i> -Tg over<br>WT | FDR-adjusted<br>p-value<br>( <i>MECP2</i> -Tg<br>over WT) |
|---------------|-----------------------------------------------------------------|-----------|--------------------------------------------|-----------------------------------------------------------|
| Bcor          | Bcl6 interacting corepressor                                    | AK053309  | 0.225                                      | 0.0070                                                    |
| Becn1         | beclin 1 (coiled-coil, myosin-like<br>BCL2-interacting protein) | AK028851  | 0.236                                      | 0.0023                                                    |
| Bmi1          | B lymphoma Mo-MLV insertion<br>region 1                         | XM_982861 | 0.279                                      | 0.0175                                                    |
| Bmp1          | bone morphogenetic protein 1                                    | NM_011359 | 0.200                                      | 0.0001                                                    |
| Bmp7          | bone morphogenetic protein 7                                    | NM_007557 | 0.302                                      | 0.0067                                                    |
| Bop1          | block of proliferation 1                                        | NM_013481 | 0.275                                      | 0.0014                                                    |
| Brcc3         | NA                                                              | AK038919  | 0.234                                      | 0.0028                                                    |
| Brwd2         | bromodomain and WD repeat domain<br>containing 2                | BC042568  | 0.252                                      | 0.0000                                                    |
| Bzrap1        | benzodiazapine receptor associated<br>protein 1                 | AK043747  | 0.236                                      | 0.0000                                                    |
| C2            | complement component 2 (within H-<br>2S)                        | NM_013484 | 0.312                                      | 0.0209                                                    |
| C230078M14Rik | NA                                                              | NM_172851 | 0.239                                      | 0.0139                                                    |
| C230088H06Rik | NA                                                              | AK089842  | 0.367                                      | 0.0004                                                    |
| C4a           | NA                                                              | XM_994603 | 0.246                                      | 0.0197                                                    |
| C78339        | expressed sequence C78339                                       | AK090371  | 0.374                                      | 0.0027                                                    |
| Cacna1b       | calcium channel, voltage-dependent,<br>N type, alpha 1B subunit | AK134542  | 0.252                                      | 0.0000                                                    |
| Cacna1h       | calcium channel, voltage-dependent,<br>T type, alpha 1H subunit | NM_021415 | 0.279                                      | 0.0000                                                    |
| Calm3         | calmodulin 3                                                    | NM_007590 | 0.232                                      | 0.0047                                                    |
| Camta2        | NA                                                              | BC023962  | 0.201                                      | 0.0003                                                    |
| Capn1         | calpain 1                                                       | AK150084  | 0.218                                      | 0.0006                                                    |
| Capn3         | calpain 3                                                       | AK040360  | 0.227                                      | 0.0019                                                    |
| Cars          | cysteinyl-tRNA synthetase                                       | NM_013742 | 0.209                                      | 0.0000                                                    |
| Casd1         | NA                                                              | NM_145398 | 0.205                                      | 0.0030                                                    |
| Caskin1       | CASK interacting protein 1                                      | NM_027937 | 0.305                                      | 0.0000                                                    |
| Casp2         | caspase 2                                                       | AK052396  | 0.263                                      | 0.0001                                                    |
| Cbx1          | chromobox homolog 1 (Drosophila<br>HP1 beta)                    | X95399    | 0.233                                      | 0.0343                                                    |
| Cbx5          | chromobox homolog 5 (Drosophila<br>HP1a)                        | AK083928  | 0.296                                      | 0.0037                                                    |
| Cc2d1b        | coiled-coil and C2 domain containing<br>1B                      | NM_177045 | 0.212                                      | 0.0020                                                    |
| Ccar1         | cell division cycle and apoptosis<br>regulator 1                | BC055954  | 0.245                                      | 0.0022                                                    |

Table S5. Continued.

Upregulated genes (940):

| Gene Symbol | Gene Name                                                                                     | Entrez ID    | Fold Change<br><i>MECP2</i> -Tg over<br>WT | FDR-adjusted<br>p-value<br>( <i>MECP2</i> -Tg<br>over WT) |
|-------------|-----------------------------------------------------------------------------------------------|--------------|--------------------------------------------|-----------------------------------------------------------|
| Ccdc120     | NA                                                                                            | NM_207202    | 0.211                                      | 0.0232                                                    |
| Ccdc132     | NA                                                                                            | AK134533     | 0.285                                      | 0.0001                                                    |
| Ccdc22      | coiled-coil domain containing 22                                                              | BC057686     | 0.247                                      | 0.0029                                                    |
| Ccdc52      | NA                                                                                            | XM_001002919 | 0.235                                      | 0.0014                                                    |
| Ccdc64      | NA                                                                                            | BC049161     | 0.215                                      | 0.0063                                                    |
| Ccnd1       | cyclin D1                                                                                     | AK017834     | 0.306                                      | 0.0008                                                    |
| Cct2        | chaperonin subunit 2 (beta)                                                                   | NM_007636    | 0.266                                      | 0.0011                                                    |
| Cct3        | chaperonin subunit 3 (gamma)                                                                  | AK158254     | 0.309                                      | 0.0279                                                    |
| Cct6a       | chaperonin subunit 6a (zeta)                                                                  | NM_009838    | 0.266                                      | 0.0051                                                    |
| Cd81        | CD 81 antigen                                                                                 | NM_133655    | 0.316                                      | 0.0052                                                    |
| Cd82        | NA                                                                                            | NM_007656    | 0.242                                      | 0.0097                                                    |
| Cd97        | CD97 antigen                                                                                  | NM_011925    | 0.245                                      | 0.0124                                                    |
| Cdan1       | congenital dyserythropoietic anemia,<br>type I (human)                                        | XM_985468    | 0.201                                      | 0.0006                                                    |
| Cdc25b      | cell division cycle 25 homolog B (S.<br><i>cerevisiae</i> )                                   | NM_023117    | 0.214                                      | 0.0058                                                    |
| Cdc9111     | CDC91 cell division cycle 91-like 1<br>( <i>S. cerevisiae</i> )                               | NM_001004721 | 0.266                                      | 0.0002                                                    |
| Cdh22       | cadherin 22                                                                                   | XM_982809    | 0.271                                      | 0.0081                                                    |
| Cdipt       | CDP-diacylglycerol--inositol 3-<br>phosphatidyltransferase<br>(phosphatidylinositol synthase) | NM_144926    | 0.256                                      | 0.0000                                                    |
| Cdk10       | cyclin-dependent kinase (CDC2-like)<br>10                                                     | XR_002479    | 0.357                                      | 0.0000                                                    |
| Cdk4        | cyclin-dependent kinase 4                                                                     | XM_917659    | 0.403                                      | 0.0391                                                    |
| Cdk5r2      | NA                                                                                            | NM_009872    | 0.292                                      | 0.0045                                                    |
| Cdt1        | NA                                                                                            | NM_026014    | 0.316                                      | 0.0121                                                    |
| Centa1      | centaurin, alpha 1                                                                            | BC079634     | 0.283                                      | 0.0000                                                    |
| Centb5      | centaurin, beta 5                                                                             | BC026407     | 0.280                                      | 0.0000                                                    |
| Centg3      | centaurin, gamma 3                                                                            | NM_139153    | 0.243                                      | 0.0000                                                    |
| Cep63       | NA                                                                                            | XM_898001    | 0.225                                      | 0.0334                                                    |
| Cga         | glycoprotein hormones, alpha subunit                                                          | BC087926     | 0.966                                      | 0.0067                                                    |
| Chrna7      | cholinergic receptor, nicotinic, alpha<br>polypeptide 7                                       | NM_007390    | 0.256                                      | 0.0050                                                    |
| Ciapin1     | cytokine induced apoptosis inhibitor1                                                         | NM_134141    | 0.300                                      | 0.0227                                                    |
| Clcn7       | chloride channel 7                                                                            | AK150395     | 0.233                                      | 0.0000                                                    |
| Clk2        | CDC-like kinase 2                                                                             | AK161259     | 0.223                                      | 0.0063                                                    |
| Clk3        | CDC-like kinase 3                                                                             | AK145880     | 0.270                                      | 0.0050                                                    |

Table S5. Continued.

Upregulated genes (940):

| Gene Symbol | Gene Name                                                                           | Entrez ID | Fold Change<br><i>MECP2</i> -Tg over<br>WT | FDR-adjusted<br>p-value<br>( <i>MECP2</i> -Tg<br>over WT) |
|-------------|-------------------------------------------------------------------------------------|-----------|--------------------------------------------|-----------------------------------------------------------|
| Clpp        | caseinolytic peptidase, ATP-dependent, proteolytic subunit homolog (E. coli)        | AK179220  | 0.269                                      | 0.0169                                                    |
| Clptm1      | cleft lip and palate associated transmembrane protein 1                             | NM_019649 | 0.228                                      | 0.0000                                                    |
| Cnih4       | cornichon homolog 4 (Drosophila)                                                    | AK144157  | 0.243                                      | 0.0047                                                    |
| Cno         | cappuccino                                                                          | NM_133724 | 0.204                                      | 0.0443                                                    |
| Colla2      | procollagen, type I, alpha 2                                                        | AK157724  | 0.296                                      | 0.0000                                                    |
| Col3a1      | procollagen, type III, alpha 1                                                      | NM_009930 | 0.285                                      | 0.0000                                                    |
| Copb1       | coatomer protein complex, subunit beta 1                                            | AK082977  | 0.237                                      | 0.0003                                                    |
| Cpne5       | copine V                                                                            | AK079192  | 0.219                                      | 0.0013                                                    |
| Cpt1a       | carnitine palmitoyltransferase 1a, liver                                            | AK050213  | 0.213                                      | 0.0001                                                    |
| Cpxm1       | carboxypeptidase X 1 (M14 family)                                                   | NM_019696 | 0.313                                      | 0.0029                                                    |
| Crebl1      | cAMP responsive element binding protein-like 1                                      | NM_017406 | 0.232                                      | 0.0001                                                    |
| Crk         | v-crk sarcoma virus CT10 oncogene homolog (avian)                                   | AK052795  | 0.284                                      | 0.0287                                                    |
| Crmp1       | collapsin response mediator protein 1                                               | NM_007765 | 0.209                                      | 0.0003                                                    |
| Csnk1e      | casein kinase 1, epsilon                                                            | AK158709  | 0.263                                      | 0.0000                                                    |
| Cspg3       | chondroitin sulfate proteoglycan 3                                                  | XM_912383 | 0.226                                      | 0.0019                                                    |
| Cspg5       | chondroitin sulfate proteoglycan 5                                                  | AK031799  | 0.246                                      | 0.0012                                                    |
| Ctbp1       | C-terminal binding protein 1                                                        | AK149906  | 0.210                                      | 0.0000                                                    |
| Ctdsp2      | CTD (carboxy-terminal domain, RNA polymerase II, polypeptide A) small phosphatase 2 | NM_146012 | 0.267                                      | 0.0019                                                    |
| Ctnnb1      | catenin (cadherin associated protein), beta 1, 88kDa                                | AK020013  | 0.263                                      | 0.0056                                                    |
| Ctnnb1l     | catenin, beta like 1                                                                | BC050787  | 0.278                                      | 0.0055                                                    |
| Ctsd        | cathepsin D                                                                         | NM_009983 | 0.258                                      | 0.0000                                                    |
| Ctss        | cathepsin S                                                                         | NM_021281 | 0.309                                      | 0.0070                                                    |
| Cxxc1       | CXXC finger 1 (PHD domain)                                                          | NM_028868 | 0.243                                      | 0.0018                                                    |
| Cyb561d1    | cytochrome b-561 domain containing 1                                                | AK005419  | 0.226                                      | 0.0345                                                    |
| Cybasc3     | cytochrome b, ascorbate dependent 3                                                 | AK040692  | 0.267                                      | 0.0029                                                    |
| Cygb        | cytoglobin                                                                          | NM_030206 | 0.218                                      | 0.0218                                                    |
| Cyp2j6      | cytochrome P450, family 2, subfamily j, polypeptide 6                               | AK078893  | 0.225                                      | 0.0089                                                    |

**Table S5.** Continued.

**Upregulated genes (940):**

| <b>Gene Symbol</b> | <b>Gene Name</b>                                                             | <b>Entrez ID</b> | <b>Fold Change<br/>MECP2-Tg over<br/>WT</b> | <b>FDR-adjusted<br/>p-value<br/>(MECP2-Tg<br/>over WT)</b> |
|--------------------|------------------------------------------------------------------------------|------------------|---------------------------------------------|------------------------------------------------------------|
| D10Ert610e         | DNA segment, Chr 10, ERATO Doi 610, expressed                                | BC054833         | 0.392                                       | 0.0000                                                     |
| D10Ert641e         | DNA segment, Chr 10, ERATO Doi 641, expressed                                | BC025117         | 0.228                                       | 0.0176                                                     |
| D10Jhu81e          | DNA segment, Chr 10, Johns Hopkins University 81 expressed                   | NM_138601        | 0.216                                       | 0.0063                                                     |
| D17Wsu92e          | DNA segment, Chr 17, Wayne State University 92, expressed                    | AK143016         | 0.234                                       | 0.0056                                                     |
| D230025D16Rik      | NA                                                                           | NM_145604        | 0.225                                       | 0.0000                                                     |
| D5Ert6579e         | DNA segment, Chr 5, ERATO Doi 579, expressed                                 | XM_913983        | 0.356                                       | 0.0025                                                     |
| D630014H12Rik      | NA                                                                           | AK085349         | 0.223                                       | 0.0376                                                     |
| D630037F22Rik      | RIKEN cDNA D630037F22 gene                                                   | AK035346         | 0.224                                       | 0.0013                                                     |
| Dapk3              | death-associated kinase 3                                                    | BC012210         | 0.201                                       | 0.0048                                                     |
| Dazap1             | DAZ associated protein 1                                                     | NM_133188        | 0.208                                       | 0.0287                                                     |
| Dbil5              | diazepam binding inhibitor-like 5                                            | NM_021294        | 0.406                                       | 0.0435                                                     |
| Dci                | dodecenoyl-Coenzyme A delta isomerase (3,2 trans-enoyl-Coenzyme A isomerase) | NM_010023        | 0.264                                       | 0.0370                                                     |
| Ddb2               | damage specific DNA binding protein 2                                        | NM_028119        | 0.248                                       | 0.0430                                                     |
| Ddn                | dendrin                                                                      | XM_912147        | 0.837                                       | 0.0095                                                     |
| Ddx20              | DEAD (Asp-Glu-Ala-Asp) box polypeptide 20                                    | AK050950         | 0.265                                       | 0.0210                                                     |
| Ddx51              | DEAD (Asp-Glu-Ala-Asp) box polypeptide 51                                    | AK085040         | 0.276                                       | 0.0000                                                     |
| Def8               | differentially expressed in FDCP 8                                           | NM_054046        | 0.244                                       | 0.0015                                                     |
| Dennd2d            | DENN/MADD domain containing 2D                                               | AK050033         | 0.314                                       | 0.0218                                                     |
| Dennd4b            | NA                                                                           | NM_201407        | 0.213                                       | 0.0000                                                     |
| Dgat1              | diacylglycerol O-acyltransferase 1                                           | NM_010046        | 0.241                                       | 0.0140                                                     |
| Dgat2              | diacylglycerol O-acyltransferase 2                                           | NM_026384        | 0.274                                       | 0.0011                                                     |
| Dgcr2              | DiGeorge syndrome critical region gene 2                                     | NM_030558        | 0.220                                       | 0.0007                                                     |
| Dgke               | diacylglycerol kinase, epsilon                                               | AK044596         | 0.233                                       | 0.0076                                                     |
| Dhx16              | DEAH (Asp-Glu-Ala-His) box polypeptide 16                                    | NM_026987        | 0.239                                       | 0.0017                                                     |
| Dhx36              | DEAH (Asp-Glu-Ala-His) box polypeptide 36                                    | NM_028136        | 0.244                                       | 0.0000                                                     |
| Diras1             | DIRAS family, GTP-binding RAS-like 1                                         | NM_145217        | 0.311                                       | 0.0485                                                     |

Table S5. Continued.

Upregulated genes (940):

| Gene Symbol | Gene Name                                                                      | Entrez ID    | Fold Change<br><i>MECP2</i> -Tg over<br>WT | FDR-adjusted<br>p-value<br>( <i>MECP2</i> -Tg<br>over WT) |
|-------------|--------------------------------------------------------------------------------|--------------|--------------------------------------------|-----------------------------------------------------------|
| Dlgap3      | discs, large (Drosophila) homolog-associated protein 3                         | BC098311     | 0.224                                      | 0.0002                                                    |
| Dlgh4       | discs, large homolog 4 (Drosophila)                                            | NM_007864    | 0.255                                      | 0.0000                                                    |
| Dmwd        | dystrophia myotonica-containing WD repeat motif                                | BC089027     | 0.258                                      | 0.0059                                                    |
| Dnajc14     | DnaJ (Hsp40) homolog, subfamily C, member 14                                   | AK053314     | 0.227                                      | 0.0308                                                    |
| Dnajc18     | DnaJ (Hsp40) homolog, subfamily C, member 18                                   | NM_029669    | 0.293                                      | 0.0001                                                    |
| Dnajc2      | DnaJ (Hsp40) homolog, subfamily C, member 2                                    | AK167991     | 0.260                                      | 0.0255                                                    |
| Dnajc7      | DnaJ (Hsp40) homolog, subfamily C, member 7                                    | AK008092     | 0.218                                      | 0.0065                                                    |
| Dnajc9      | DnaJ (Hsp40) homolog, subfamily C, member 9                                    | NM_134081    | 0.369                                      | 0.0324                                                    |
| Dock11      | dedicator of cytokinesis 11                                                    | NM_001009947 | 0.237                                      | 0.0003                                                    |
| Dock6       | dedicator of cytokinesis 6                                                     | AK129348     | 0.244                                      | 0.0130                                                    |
| Drd1ip      | dopamine receptor D1 interacting protein                                       | NM_026769    | 0.210                                      | 0.0121                                                    |
| Dtnb        | dystrobrevin, beta                                                             | AK157158     | 0.312                                      | 0.0000                                                    |
| Dullard     | Dullard homolog ( <i>Xenopus laevis</i> )                                      | XM_978384    | 0.274                                      | 0.0129                                                    |
| Dus11       | dihydrouridine synthase 1-like ( <i>S. cerevisiae</i> )                        | AK179747     | 0.281                                      | 0.0002                                                    |
| Dus31       | dihydrouridine synthase 3-like ( <i>S. cerevisiae</i> )                        | AK166183     | 0.250                                      | 0.0034                                                    |
| Dvl3        | dishevelled 3, dsh homolog (Drosophila)                                        | AK052151     | 0.215                                      | 0.0000                                                    |
| Ecm2        | extracellular matrix protein 2, female organ and adipocyte specific            | NM_001012324 | 0.274                                      | 0.0278                                                    |
| Edc4        | NA                                                                             | NM_181594    | 0.275                                      | 0.0000                                                    |
| Efemp2      | epidermal growth factor-containing fibulin-like extracellular matrix protein 2 | AK075585     | 0.310                                      | 0.0000                                                    |
| Efhd2       | EF hand domain containing 2                                                    | XM_992220    | 0.316                                      | 0.0422                                                    |
| Efnb2       | ephrin B2                                                                      | NM_010111    | 0.296                                      | 0.0021                                                    |
| Efs         | embryonal Fyn-associated substrate                                             | NM_010112    | 0.241                                      | 0.0067                                                    |
| Eftud2      | elongation factor Tu GTP binding domain containing 2                           | NM_011431    | 0.222                                      | 0.0001                                                    |
| EG216185    | NA                                                                             | NM_020024    | 0.278                                      | 0.0272                                                    |
| EG381065    | NA                                                                             | XM_001006374 | 0.320                                      | 0.0376                                                    |

**Table S5.** Continued.

**Upregulated genes (940):**

| <b>Gene Symbol</b> | <b>Gene Name</b>                                                                            | <b>Entrez ID</b> | <b>Fold Change<br/><i>MECP2</i>-Tg over<br/>WT</b> | <b>FDR-adjusted<br/>p-value<br/>(<i>MECP2</i>-Tg<br/>over WT)</b> |
|--------------------|---------------------------------------------------------------------------------------------|------------------|----------------------------------------------------|-------------------------------------------------------------------|
| EG544864           | NA                                                                                          | XM_974939        | 0.518                                              | 0.0181                                                            |
| EG545216           | NA                                                                                          | NM_178072        | 0.358                                              | 0.0109                                                            |
| EG627022           | NA                                                                                          | NM_027978        | 0.241                                              | 0.0449                                                            |
| Egfl7              | EGF-like domain 7                                                                           | NM_198725        | 0.265                                              | 0.0334                                                            |
| Egln1              | EGL nine homolog 1 ( <i>C. elegans</i> )                                                    | NM_053207        | 0.219                                              | 0.0121                                                            |
| Ehbp111            | NA                                                                                          | NM_053252        | 0.207                                              | 0.0213                                                            |
| Ehmt2              | euchromatic histone lysine N-<br>methyltransferase 2                                        | NM_145830        | 0.312                                              | 0.0000                                                            |
| Eif2c4             | eukaryotic translation initiation factor<br>2C, 4                                           | AK032475         | 0.201                                              | 0.0093                                                            |
| Eif3s8             | eukaryotic translation initiation factor<br>3, subunit 8                                    | XM_993422        | 0.251                                              | 0.0027                                                            |
| Elavl3             | ELAV (embryonic lethal, abnormal<br>vision, <i>Drosophila</i> )-like 3 (Hu antigen<br>C)    | AK090281         | 0.200                                              | 0.0182                                                            |
| Elk1               | ELK1, member of ETS oncogene<br>family                                                      | NM_007922        | 0.328                                              | 0.0156                                                            |
| Elmod2             | ELMO domain containing 2                                                                    | NM_178736        | 0.206                                              | 0.0031                                                            |
| Eml3               | echinoderm microtubule associated<br>protein like 3                                         | NM_144872        | 0.241                                              | 0.0152                                                            |
| Entpd2             | ectonucleoside triphosphate<br>diphosphohydrolase 2                                         | U91511           | 0.295                                              | 0.0178                                                            |
| Ephb2              | Eph receptor B2                                                                             | NM_010142        | 0.253                                              | 0.0000                                                            |
| Epn1               | epsin 1                                                                                     | BC106134         | 0.290                                              | 0.0264                                                            |
| Epn3               | epsin 3                                                                                     | AK158031         | 0.230                                              | 0.0094                                                            |
| Ercc2              | excision repair cross-complementing<br>rodent repair deficiency,<br>complementation group 2 | NM_007949        | 0.325                                              | 0.0000                                                            |
| Esrra              | estrogen related receptor, alpha                                                            | NM_007953        | 0.313                                              | 0.0050                                                            |
| Ets2               | E26 avian leukemia oncogene 2, 3'<br>domain                                                 | NM_011809        | 0.307                                              | 0.0000                                                            |
| Exosc4             | exosome component 4                                                                         | BC012277         | 0.370                                              | 0.0432                                                            |
| Extl1              | exostoses (multiple)-like 1                                                                 | NM_019578        | 0.257                                              | 0.0211                                                            |
| Extl3              | exostoses (multiple)-like 3                                                                 | NM_018788        | 0.244                                              | 0.0056                                                            |
| F8                 | coagulation factor VIII                                                                     | NM_007977        | 0.282                                              | 0.0012                                                            |
| Faf1               | Fas-associated factor 1                                                                     | NM_007983        | 0.211                                              | 0.0121                                                            |
| Fam18b             | NA                                                                                          | XM_974979        | 0.303                                              | 0.0041                                                            |
| Farsla             | phenylalanine-tRNA synthetase-like,<br>alpha subunit                                        | AK016506         | 0.251                                              | 0.0131                                                            |



Table S5. Continued.

Upregulated genes (940):

| Gene Symbol | Gene Name                                                                                      | Entrez ID    | Fold Change<br><i>MECP2</i> -Tg over<br>WT | FDR-adjusted<br>p-value<br>( <i>MECP2</i> -Tg<br>over WT) |
|-------------|------------------------------------------------------------------------------------------------|--------------|--------------------------------------------|-----------------------------------------------------------|
| Fasn        | fatty acid synthase                                                                            | NM_007988    | 0.262                                      | 0.0000                                                    |
| Fbx118      | F-box and leucine-rich repeat protein 18                                                       | NM_001033312 | 0.212                                      | 0.0435                                                    |
| Fbx13       | F-box and leucine-rich repeat protein 3                                                        | NM_015822    | 0.209                                      | 0.0396                                                    |
| Fbxo18      | F-box protein 18                                                                               | AK083118     | 0.238                                      | 0.0002                                                    |
| Fbxo6       | NA                                                                                             | NM_015797    | 0.258                                      | 0.0500                                                    |
| Fbxw2       | F-box and WD-40 domain protein 2                                                               | AK133758     | 0.341                                      | 0.0033                                                    |
| Fbxw8       | F-box and WD-40 domain protein 8                                                               | NM_172721    | 0.226                                      | 0.0025                                                    |
| Fchsd2      | FCH and double SH3 domains 2                                                                   | NM_199012    | 0.214                                      | 0.0000                                                    |
| Fgfr3       | fibroblast growth factor receptor 3                                                            | NM_008010    | 0.217                                      | 0.0001                                                    |
| Fhit        | fragile histidine triad gene                                                                   | BC012662     | 0.242                                      | 0.0461                                                    |
| Fhl1        | four and a half LIM domains 1                                                                  | BC059009     | 0.281                                      | 0.0228                                                    |
| Flcn        | folliculin                                                                                     | NM_146018    | 0.211                                      | 0.0024                                                    |
| Flot2       | flotillin 2                                                                                    | NM_008028    | 0.259                                      | 0.0001                                                    |
| Fmnl3       | formin-like 3                                                                                  | NM_011711    | 0.202                                      | 0.0031                                                    |
| Foxk2       | forkhead box K2                                                                                | AK139325     | 0.238                                      | 0.0106                                                    |
| Fpgt        | fucose-1-phosphate<br>guanylyltransferase                                                      | AK030969     | 0.284                                      | 0.0222                                                    |
| Frs3        | fibroblast growth factor receptor<br>substrate 3                                               | NM_144939    | 0.257                                      | 0.0499                                                    |
| Fsd1        | fibronectin type 3 and SPRY domain-<br>containing protein                                      | NM_183178    | 0.259                                      | 0.0039                                                    |
| Fuk         | fucokinase                                                                                     | NM_172283    | 0.257                                      | 0.0000                                                    |
| Fus         | c("fusion, derived from t(12", "16)<br>malignant liposarcoma (human)")                         | BC058247     | 0.230                                      | 0.0101                                                    |
| Fvt1        | follicular lymphoma variant<br>translocation 1                                                 | NM_027534    | 0.237                                      | 0.0006                                                    |
| Fxr2        | NA                                                                                             | NM_011814    | 0.277                                      | 0.0000                                                    |
| Gabre       | gamma-aminobutyric acid (GABA-<br>A) receptor, subunit epsilon                                 | NM_017369    | 0.416                                      | 0.0051                                                    |
| Galnt4      | UDP-N-acetyl-alpha-D-<br>galactosamine:polypeptide N-<br>acetylgalactosaminyltransferase-like4 | NM_173739    | 0.294                                      | 0.0047                                                    |
| Gars        | glycyl-tRNA synthetase                                                                         | AK190416     | 0.274                                      | 0.0004                                                    |
| Gas8        | growth arrest specific 8                                                                       | AK140135     | 0.293                                      | 0.0136                                                    |
| Gbl         | NA                                                                                             | AF237676     | 0.259                                      | 0.0002                                                    |
| Gdap111     | ganglioside-induced differentiation-<br>associated protein 1-like 1                            | AK141371     | 0.293                                      | 0.0065                                                    |

Table S5. Continued.

Upregulated genes (940):

| Gene Symbol | Gene Name                                                                        | Entrez ID | Fold Change<br><i>MECP2</i> -Tg over<br>WT | FDR-adjusted<br>p-value<br>( <i>MECP2</i> -Tg<br>over WT) |
|-------------|----------------------------------------------------------------------------------|-----------|--------------------------------------------|-----------------------------------------------------------|
| Gdpd1       | glycerophosphodiester<br>phosphodiesterase domain containing<br>1                | NM_025638 | 0.206                                      | 0.0001                                                    |
| Gdpd5       | glycerophosphodiester<br>phosphodiesterase domain containing<br>5                | NM_201352 | 0.230                                      | 0.0001                                                    |
| Gfap        | glial fibrillary acidic protein                                                  | AK140151  | 0.332                                      | 0.0000                                                    |
| Gga2        | golgi associated, gamma adaptin ear<br>containing, ARF binding protein 2         | AK051911  | 0.266                                      | 0.0006                                                    |
| Ggcx        | gamma-glutamyl carboxylase                                                       | NM_019802 | 0.240                                      | 0.0010                                                    |
| Ggnbp2      | gametogenetin binding protein 2                                                  | NM_153144 | 0.205                                      | 0.0470                                                    |
| Ghitm       | growth hormone inducible<br>transmembrane protein                                | AK168678  | 0.240                                      | 0.0036                                                    |
| Gins4       | NA                                                                               | AK016667  | 0.224                                      | 0.0045                                                    |
| Gm705       | NA                                                                               | XM_984028 | 0.748                                      | 0.0332                                                    |
| Gm719       | NA                                                                               | XM_907647 | 0.344                                      | 0.0183                                                    |
| Gmeb2       | glucocorticoid modulatory element<br>binding protein 2                           | NM_198169 | 0.204                                      | 0.0036                                                    |
| Gmfb        | glia maturation factor, beta                                                     | NM_022023 | 0.217                                      | 0.0172                                                    |
| Gna11       | guanine nucleotide binding protein,<br>alpha 11                                  | XM_988472 | 0.238                                      | 0.0023                                                    |
| Gnai2       | guanine nucleotide binding protein,<br>alpha inhibiting 2                        | BC065159  | 0.244                                      | 0.0011                                                    |
| Gnai3       | guanine nucleotide binding protein,<br>alpha inhibiting 3                        | NM_010306 | 0.310                                      | 0.0047                                                    |
| Gna-rs1     | guanine nucleotide binding protein,<br>related sequence 1                        | BC013243  | 0.303                                      | 0.0287                                                    |
| Gnas        | GNAS (guanine nucleotide binding<br>protein, alpha stimulating) complex<br>locus | NM_019690 | 0.250                                      | 0.0011                                                    |
| Gnb2        | guanine nucleotide binding protein,<br>beta 2                                    | AK002604  | 0.372                                      | 0.0158                                                    |
| Gnpat       | glyceronephosphate O-acyltransferase                                             | NM_010322 | 0.286                                      | 0.0000                                                    |
| Gnptg       | N-acetylglucosamine-1-<br>phosphotransferase, gamma subunit                      | NM_172529 | 0.222                                      | 0.0005                                                    |
| Gorasp1     | golgi reassembly stacking protein 1                                              | AK017293  | 0.277                                      | 0.0002                                                    |
| Gpaa1       | GPI anchor attachment protein 1                                                  | NM_010331 | 0.251                                      | 0.0018                                                    |
| Gpbp1       | GC-rich promoter binding protein 1                                               | AK145318  | 0.294                                      | 0.0001                                                    |
| Gpcl        | glypican 1                                                                       | NM_016696 | 0.299                                      | 0.0000                                                    |
| Gpr137      | NA                                                                               | AK143450  | 0.256                                      | 0.0021                                                    |

Table S5. Continued.

Upregulated genes (940):

| Gene Symbol | Gene Name                                                                  | Entrez ID    | Fold Change<br><i>MECP2</i> -Tg over<br>WT | FDR-adjusted<br>p-value<br>( <i>MECP2</i> -Tg<br>over WT) |
|-------------|----------------------------------------------------------------------------|--------------|--------------------------------------------|-----------------------------------------------------------|
| Gps1        | G protein pathway suppressor 1                                             | NM_145370    | 0.275                                      | 0.0049                                                    |
| Gramd3      | NA                                                                         | AK038289     | 0.223                                      | 0.0012                                                    |
| Grb14       | growth factor receptor bound protein 14                                    | NM_016719    | 0.215                                      | 0.0389                                                    |
| Grik3       | glutamate receptor, ionotropic, kainate 3                                  | XM_993378    | 0.262                                      | 0.0000                                                    |
| Gsk3a       | NA                                                                         | NM_001031667 | 0.247                                      | 0.0009                                                    |
| Gtf2h1      | general transcription factor II H, polypeptide 1                           | BC052837     | 0.272                                      | 0.0003                                                    |
| Gtf3c4      | general transcription factor IIIC, polypeptide 4                           | BC061476     | 0.217                                      | 0.0059                                                    |
| Gtpbp2      | GTP binding protein 2                                                      | NM_019581    | 0.226                                      | 0.0036                                                    |
| Gtpbp3      | GTP binding protein 3                                                      | NM_032544    | 0.262                                      | 0.0072                                                    |
| Gtpbp6      | GTP binding protein 6 (putative)                                           | NM_145147    | 0.334                                      | 0.0012                                                    |
| Gucy1b3     | guanylate cyclase 1, soluble, beta 3                                       | NM_017469    | 0.233                                      | 0.0010                                                    |
| Hcfc1       | host cell factor C1                                                        | NM_008224    | 0.224                                      | 0.0000                                                    |
| Hdac5       | histone deacetylase 5                                                      | AK156008     | 0.277                                      | 0.0000                                                    |
| Heatr1      | HEAT repeat containing 1                                                   | NM_144835    | 0.211                                      | 0.0005                                                    |
| Heatr3      | NA                                                                         | BC048074     | 0.315                                      | 0.0000                                                    |
| Hectd3      | HECT domain containing 3                                                   | NM_175244    | 0.239                                      | 0.0000                                                    |
| Hiat1l      | hippocampus abundant transcript-like 1                                     | NM_133680    | 0.234                                      | 0.0001                                                    |
| Hif1an      | hypoxia-inducible factor 1, alpha subunit inhibitor                        | NM_176958    | 0.281                                      | 0.0022                                                    |
| Hira        | histone cell cycle regulation defective homolog A ( <i>S. cerevisiae</i> ) | AK161118     | 0.309                                      | 0.0000                                                    |
| Hnrpdl      | heterogeneous nuclear ribonucleoprotein D-like                             | XR_003344    | 0.219                                      | 0.0447                                                    |
| Hps4        | Hermansky-Pudlak syndrome 4 homolog (human)                                | BC107023     | 0.286                                      | 0.0002                                                    |
| Hsd17b12    | hydroxysteroid (17-beta) dehydrogenase 12                                  | AK076088     | 0.205                                      | 0.0088                                                    |
| Hsd17b4     | hydroxysteroid (17-beta) dehydrogenase 4                                   | NM_008292    | 0.234                                      | 0.0000                                                    |
| Hsp90ab1    | NA                                                                         | NM_008302    | 0.202                                      | 0.0493                                                    |
| Htf9c       | HpaII tiny fragments locus 9c                                              | AK080170     | 0.207                                      | 0.0463                                                    |
| Icam5       | intercellular adhesion molecule 5, telencephalin                           | NM_008319    | 0.597                                      | 0.0000                                                    |
| Icmt        | isoprenylcysteine carboxyl methyltransferase                               | NM_133788    | 0.221                                      | 0.0079                                                    |

Table S5. Continued.

Upregulated genes (940):

| Gene Symbol | Gene Name                                                      | Entrez ID | Fold Change<br><i>MECP2-Tg</i> over<br>WT | FDR-adjusted<br>p-value<br>( <i>MECP2-Tg</i><br>over WT) |
|-------------|----------------------------------------------------------------|-----------|-------------------------------------------|----------------------------------------------------------|
| Icosl       | icos ligand                                                    | AK220220  | 0.314                                     | 0.0347                                                   |
| Idh2        | isocitrate dehydrogenase 2 (NADP+),<br>mitochondrial           | NM_173011 | 0.257                                     | 0.0021                                                   |
| Idh3b       | isocitrate dehydrogenase 3 (NAD+)<br>beta                      | AK046059  | 0.273                                     | 0.0000                                                   |
| Idh3g       | isocitrate dehydrogenase 3 (NAD+),<br>gamma                    | NM_008323 | 0.260                                     | 0.0049                                                   |
| Ifrd2       | interferon-related developmental<br>regulator 2                | NM_025903 | 0.205                                     | 0.0307                                                   |
| Igsf4c      | immunoglobulin superfamily,<br>member 4C                       | NM_153112 | 0.281                                     | 0.0001                                                   |
| Igsf8       | immunoglobulin superfamily,<br>member 8                        | BC060087  | 0.408                                     | 0.0001                                                   |
| Ilk         | integrin linked kinase                                         | NM_010562 | 0.218                                     | 0.0463                                                   |
| Imp4        | IMP4, U3 small nucleolar<br>ribonucleoprotein, homolog (yeast) | NM_178601 | 0.258                                     | 0.0000                                                   |
| Impad1      | inositol monophosphatase domain<br>containing 1                | NM_177730 | 0.276                                     | 0.0025                                                   |
| Ints8       | NA                                                             | AK036255  | 0.202                                     | 0.0102                                                   |
| Ipo13       | importin 13                                                    | NM_146152 | 0.220                                     | 0.0007                                                   |
| Ipo4        | importin 4                                                     | BC085150  | 0.240                                     | 0.0000                                                   |
| Iqcb1       | IQ calmodulin-binding motif<br>containing 1                    | AK087791  | 0.201                                     | 0.0251                                                   |
| Iqsec2      | IQ motif and Sec7 domain 2                                     | AY451401  | 0.224                                     | 0.0008                                                   |
| Ireb2       | iron responsive element binding<br>protein 2                   | AK034218  | 0.224                                     | 0.0001                                                   |
| Irf3        | interferon regulatory factor 3                                 | NM_016849 | 0.235                                     | 0.0398                                                   |
| Itfg3       | NA                                                             | NM_207217 | 0.244                                     | 0.0000                                                   |
| Itgb1       | integrin beta 1 (fibronectin receptor<br>beta)                 | U37029    | 0.323                                     | 0.0000                                                   |
| Itgb5       | integrin beta 5                                                | NM_010580 | 0.305                                     | 0.0000                                                   |
| Itm2c       | integral membrane protein 2C                                   | NM_022417 | 0.211                                     | 0.0325                                                   |
| Jakmip1     | NA                                                             | NM_178394 | 0.308                                     | 0.0001                                                   |
| Jazf1       | NA                                                             | AK047180  | 0.251                                     | 0.0353                                                   |
| Jmjd4       | jumonji domain containing 4                                    | BC049148  | 0.216                                     | 0.0494                                                   |
| Josd1       | NA                                                             | NM_028792 | 0.281                                     | 0.0089                                                   |
| Jph3        | junctionophilin 3                                              | NM_020605 | 0.321                                     | 0.0018                                                   |
| Jph4        | junctionophilin 4                                              | NM_007455 | 0.299                                     | 0.0013                                                   |
| Kcnip2      | Kv channel-interacting protein 2                               | NM_145704 | 0.202                                     | 0.0090                                                   |

Table S5. Continued.

Upregulated genes (940):

| Gene Symbol | Gene Name                                                    | Entrez ID    | Fold Change<br><i>MECP2-Tg</i> over<br>WT | FDR-adjusted<br>p-value<br>( <i>MECP2-Tg</i><br>over WT) |
|-------------|--------------------------------------------------------------|--------------|-------------------------------------------|----------------------------------------------------------|
| Kcnk6       | potassium inwardly-rectifying channel, subfamily K, member 6 | NM_001033525 | 0.259                                     | 0.0208                                                   |
| Kctd15      | potassium channel tetramerisation domain containing 15       | NM_146188    | 0.295                                     | 0.0378                                                   |
| Khk         | ketoheokinase                                                | NM_008439    | 0.290                                     | 0.0030                                                   |
| Kif21b      | kinesin family member 21B                                    | AK089400     | 0.217                                     | 0.0000                                                   |
| Kirrel3     | kin of IRRE like 3 (Drosophila)                              | NM_026324    | 0.215                                     | 0.0001                                                   |
| Klhdc8b     | NA                                                           | BC060089     | 0.323                                     | 0.0010                                                   |
| Klhl22      | kelch-like 22 (Drosophila)                                   | AK012046     | 0.299                                     | 0.0016                                                   |
| Kns2        | kinesin 2                                                    | NM_001025362 | 0.227                                     | 0.0044                                                   |
| Kptn        | kaptin                                                       | AK081226     | 0.258                                     | 0.0464                                                   |
| Lamp2       | lysosomal membrane glycoprotein 2                            | AK051989     | 0.214                                     | 0.0217                                                   |
| Lars        | leucyl-tRNA synthetase                                       | XM_901173    | 0.224                                     | 0.0001                                                   |
| Lass2       | longevity assurance homolog 2 (S. cerevisiae)                | NM_029789    | 0.329                                     | 0.0001                                                   |
| Lcmt1       | leucine carboxyl methyltransferase 1                         | BC010316     | 0.296                                     | 0.0089                                                   |
| Leprel      | leprecan 1                                                   | NM_001042411 | 0.242                                     | 0.0199                                                   |
| Lig3        | ligase III, DNA, ATP-dependent                               | U66057       | 0.200                                     | 0.0074                                                   |
| Limd1       | LIM domains containing 1                                     | NM_013860    | 0.273                                     | 0.0500                                                   |
| Limk2       | LIM motif-containing protein kinase 2                        | AK161560     | 0.225                                     | 0.0010                                                   |
| Lman2l      | lectin, mannose-binding 2-like                               | AK041656     | 0.274                                     | 0.0015                                                   |
| Lmln        | leishmanolysin-like (metallopeptidase M8 family)             | NM_172823    | 0.236                                     | 0.0002                                                   |
| Lmtk3       | lemur tyrosine kinase 3                                      | NM_001005511 | 0.288                                     | 0.0000                                                   |
| LOC385211   | NA                                                           | AK049536     | 0.572                                     | 0.0270                                                   |
| LOC630776   | NA                                                           | AK049585     | 0.239                                     | 0.0079                                                   |
| LOC631002   | NA                                                           | XM_919014    | 2.292                                     | 0.0000                                                   |
| LOC631981   | NA                                                           | XM_354985    | 0.364                                     | 0.0012                                                   |
| LOC632799   | NA                                                           | NM_133910    | 0.334                                     | 0.0288                                                   |
| LOC634390   | NA                                                           | NM_028840    | 0.306                                     | 0.0034                                                   |
| LOC635658   | NA                                                           | NM_025788    | 0.273                                     | 0.0088                                                   |
| LOC636848   | NA                                                           | NM_007789    | 0.228                                     | 0.0030                                                   |
| LOC637661   | NA                                                           | AK044685     | 0.241                                     | 0.0001                                                   |
| LOC638576   | NA                                                           | AK203333     | 0.300                                     | 0.0062                                                   |
| LOC641104   | NA                                                           | NM_019770    | 0.520                                     | 0.0289                                                   |
| LOC641141   | NA                                                           | AK080118     | 0.277                                     | 0.0022                                                   |

Table S5. Continued.

Upregulated genes (940):

| Gene Symbol | Gene Name                                                           | Entrez ID    | Fold Change<br><i>MECP2</i> -Tg over<br>WT | FDR-adjusted<br>p-value<br>( <i>MECP2</i> -Tg<br>over WT) |
|-------------|---------------------------------------------------------------------|--------------|--------------------------------------------|-----------------------------------------------------------|
| LOC666313   | NA                                                                  | XM_982985    | 0.303                                      | 0.0203                                                    |
| LOC666405   | NA                                                                  | AK146086     | 0.221                                      | 0.0120                                                    |
| LOC668047   | NA                                                                  | AK020104     | 0.217                                      | 0.0199                                                    |
| LOC669930   | NA                                                                  | NM_054063    | 0.706                                      | 0.0400                                                    |
| LOC670116   | NA                                                                  | NM_024195    | 0.355                                      | 0.0239                                                    |
| LOC670579   | NA                                                                  | NM_029097    | 0.254                                      | 0.0000                                                    |
| LOC671402   | NA                                                                  | XR_004532    | 0.549                                      | 0.0081                                                    |
| LOC671511   | NA                                                                  | AK132671     | 0.384                                      | 0.0021                                                    |
| LOC672350   | NA                                                                  | XM_890293    | 0.214                                      | 0.0077                                                    |
| LOC672466   | NA                                                                  | XM_993654    | 0.266                                      | 0.0273                                                    |
| LOC673058   | NA                                                                  | XM_001003979 | 0.819                                      | 0.0345                                                    |
| LOC674856   | NA                                                                  | XM_994883    | 0.257                                      | 0.0022                                                    |
| LOC677007   | NA                                                                  | AK087038     | 0.367                                      | 0.0154                                                    |
| Lonrf3      | LON peptidase N-terminal domain<br>and ring finger 3                | NM_028894    | 0.304                                      | 0.0237                                                    |
| Lphn1       | latrophilin 1                                                       | AK157878     | 0.259                                      | 0.0000                                                    |
| Lrfn4       | leucine rich repeat and fibronectin<br>type III domain containing 4 | NM_153388    | 0.270                                      | 0.0302                                                    |
| Lrig2       | leucine-rich repeats and<br>immunoglobulin-like domains 2           | NM_001025067 | 0.218                                      | 0.0005                                                    |
| Lrp4        | low density lipoprotein receptor-<br>related protein 4              | NM_172668    | 0.225                                      | 0.0000                                                    |
| Lrrc14      | leucine rich repeat containing 14                                   | NM_145471    | 0.326                                      | 0.0161                                                    |
| Lrrc23      | NA                                                                  | NM_013588    | 0.314                                      | 0.0311                                                    |
| Lrrc24      | NA                                                                  | NM_198119    | 0.296                                      | 0.0273                                                    |
| Lrrc40      | leucine rich repeat containing 40                                   | NM_024194    | 0.265                                      | 0.0009                                                    |
| Lrrc45      | leucine rich repeat containing 45                                   | NM_026877    | 0.250                                      | 0.0004                                                    |
| Lrrc59      | NA                                                                  | NM_133807    | 0.268                                      | 0.0004                                                    |
| Lsm14a      | NA                                                                  | NM_025948    | 0.222                                      | 0.0000                                                    |
| Lsm14b      | NA                                                                  | NM_177727    | 0.240                                      | 0.0007                                                    |
| Lss         | lanosterol synthase                                                 | AK054393     | 0.250                                      | 0.0002                                                    |
| Ltb4dh      | leukotriene B4 12-<br>hydroxydehydrogenase                          | BC014865     | 0.365                                      | 0.0183                                                    |
| Lzic        | leucine zipper and CTNNBIP1<br>domain containing                    | NM_026963    | 0.286                                      | 0.0069                                                    |
| Lzts2       | leucine zipper, putative tumor<br>suppressor 2                      | NM_145503    | 0.251                                      | 0.0028                                                    |
| Magel2      | melanoma antigen, family L, 2                                       | XM_622091    | 0.276                                      | 0.0066                                                    |

**Table S5.** Continued.

**Upregulated genes (940):**

| <b>Gene Symbol</b> | <b>Gene Name</b>                                                                     | <b>Entrez ID</b> | <b>Fold Change<br/>MECP2-Tg over<br/>WT</b> | <b>FDR-adjusted<br/>p-value<br/>(MECP2-Tg<br/>over WT)</b> |
|--------------------|--------------------------------------------------------------------------------------|------------------|---------------------------------------------|------------------------------------------------------------|
| Mamdc2             | MAM domain containing 2                                                              | AK004794         | 0.270                                       | 0.0180                                                     |
| Man2c1             | mannosidase, alpha, class 2C,<br>member 1                                            | NM_028636        | 0.267                                       | 0.0000                                                     |
| Map3k10            | mitogen activated protein kinase<br>kinase kinase 10                                 | XM_194344        | 0.291                                       | 0.0000                                                     |
| Map3k11            | mitogen activated protein kinase<br>kinase kinase 11                                 | NM_022012        | 0.227                                       | 0.0339                                                     |
| Map4k2             | mitogen activated protein kinase<br>kinase kinase kinase 2                           | NM_009006        | 0.213                                       | 0.0000                                                     |
| Mapk8              | mitogen activated protein kinase 8                                                   | NM_016700        | 0.236                                       | 0.0180                                                     |
| Mapkbp1            | mitogen activated protein kinase<br>binding protein 1                                | AK122323         | 0.213                                       | 0.0000                                                     |
| Mark3              | MAP/microtubule affinity-regulating<br>kinase 3                                      | AK220557         | 0.252                                       | 0.0002                                                     |
| Matk               | megakaryocyte-associated tyrosine<br>kinase                                          | AK079816         | 0.216                                       | 0.0030                                                     |
| Mbd6               | methyl-CpG binding domain protein6                                                   | NM_033072        | 0.255                                       | 0.0153                                                     |
| Mboat5             | NA                                                                                   | NM_145130        | 0.231                                       | 0.0005                                                     |
| Mcm4               | minichromosome maintenance<br>deficient 4 homolog (S. cerevisiae)                    | AK083618         | 0.272                                       | 0.0012                                                     |
| Mcm5               | minichromosome maintenance<br>deficient 5, cell division cycle 46 (S.<br>cerevisiae) | NM_010442        | 0.276                                       | 0.0034                                                     |
| Mcrs1              | microspherule protein 1                                                              | NM_016766        | 0.295                                       | 0.0000                                                     |
| Mdh1b              | malate dehydrogenase 1B, NAD<br>(soluble)                                            | NM_029696        | 0.288                                       | 0.0002                                                     |
| Mdh2               | malate dehydrogenase 2, NAD<br>(mitochondrial)                                       | NM_008617        | 0.306                                       | 0.0005                                                     |
| Med25              | mediator of RNA polymerase II<br>transcription, subunit 25 homolog<br>(yeast)        | AK149867         | 0.237                                       | 0.0001                                                     |
| Mett10d            | NA                                                                                   | NM_026197        | 0.320                                       | 0.0001                                                     |
| Mettl2             | methyltransferase like 2                                                             | AK048040         | 0.224                                       | 0.0064                                                     |
| Mettl9             | NA                                                                                   | AK188768         | 0.359                                       | 0.0180                                                     |
| Mgrn1              | mahogunin, ring finger 1                                                             | AK034100         | 0.222                                       | 0.0000                                                     |
| Mib1               | mindbomb homolog 1 (Drosophila)                                                      | AK080847         | 0.209                                       | 0.0003                                                     |
| Mib2               | mindbomb homolog 2 (Drosophila)                                                      | BC058086         | 0.268                                       | 0.0000                                                     |
| Mier2              | NA                                                                                   | NM_027422        | 0.258                                       | 0.0002                                                     |
| Mink1              | misshapen-like kinase 1 (zebrafish)                                                  | NM_001045959     | 0.238                                       | 0.0000                                                     |
| Mir16              | NA                                                                                   | NM_019580        | 0.321                                       | 0.0016                                                     |

Table S5. Continued.

Upregulated genes (940):

| Gene Symbol | Gene Name                                                                          | Entrez ID    | Fold Change<br><i>MECP2-Tg</i> over<br>WT | FDR-adjusted<br>p-value<br>( <i>MECP2-Tg</i><br>over WT) |
|-------------|------------------------------------------------------------------------------------|--------------|-------------------------------------------|----------------------------------------------------------|
| Mizf        | NA                                                                                 | XM_993174    | 0.226                                     | 0.0036                                                   |
| Mllt1       | myeloid/lymphoid or mixed lineage-leukemia translocation to 1 homolog (Drosophila) | NM_022328    | 0.303                                     | 0.0018                                                   |
| Mllt6       | myeloid/lymphoid or mixed lineage-leukemia translocation to 6 homolog (Drosophila) | NM_139311    | 0.244                                     | 0.0002                                                   |
| Mlx         | NA                                                                                 | NM_011550    | 0.259                                     | 0.0329                                                   |
| Mmell       | NA                                                                                 | NM_013783    | 0.204                                     | 0.0094                                                   |
| Mmp2        | matrix metalloproteinase 2                                                         | AK217488     | 0.200                                     | 0.0437                                                   |
| Mms19l      | MMS19 (MET18 <i>S. cerevisiae</i> )-like                                           | NM_028152    | 0.283                                     | 0.0000                                                   |
| Mov10       | Moloney leukemia virus 10                                                          | AK159295     | 0.225                                     | 0.0008                                                   |
| Mrpl10      | mitochondrial ribosomal protein L10                                                | AK078499     | 0.268                                     | 0.0360                                                   |
| Mrpl37      | mitochondrial ribosomal protein L37                                                | AK030828     | 0.218                                     | 0.0203                                                   |
| Mrpl4       | mitochondrial ribosomal protein L4                                                 | AK216490     | 0.213                                     | 0.0036                                                   |
| Mst1r       | macrophage stimulating 1 receptor (c-met-related tyrosine kinase)                  | NM_009074    | 0.231                                     | 0.0029                                                   |
| Mta2        | metastasis-associated gene family, member 2                                        | AK183116     | 0.214                                     | 0.0003                                                   |
| Mtap1s      | NA                                                                                 | AK158860     | 0.234                                     | 0.0080                                                   |
| Mtf2        | metal response element binding transcription factor 2                              | NM_013827    | 0.274                                     | 0.0008                                                   |
| Mthfsd      | NA                                                                                 | NM_172761    | 0.269                                     | 0.0004                                                   |
| Mtm1        | X-linked myotubular myopathy gene1                                                 | AK220524     | 0.245                                     | 0.0019                                                   |
| Mtmr4       | myotubularin related protein 4                                                     | NM_133215    | 0.223                                     | 0.0000                                                   |
| Mvk         | mevalonate kinase                                                                  | AK009261     | 0.249                                     | 0.0188                                                   |
| Mxd4        | Max dimerization protein 4                                                         | NM_001015039 | 0.362                                     | 0.0163                                                   |
| Mxra8       | matrix-remodelling associated 8                                                    | NM_024263    | 0.375                                     | 0.0010                                                   |
| Myo5b       | myosin Vb                                                                          | BC030481     | 0.227                                     | 0.0006                                                   |
| Nab2        | Ngfi-A binding protein 2                                                           | NM_008668    | 0.259                                     | 0.0084                                                   |
| Nat12       | NA                                                                                 | XM_988793    | 0.290                                     | 0.0430                                                   |
| Nat8l       | NA                                                                                 | NM_001001985 | 0.231                                     | 0.0425                                                   |
| Ndg2        | NA                                                                                 | NM_175329    | 0.229                                     | 0.0184                                                   |
| Ndor1       | NADPH dependent diflavin oxidoreductase 1                                          | NM_178239    | 0.278                                     | 0.0000                                                   |
| Ndufa10     | NADH dehydrogenase (ubiquinone) 1 alpha subcomplex 10                              | AK046292     | 0.215                                     | 0.0146                                                   |
| Ndufb5      | NADH dehydrogenase (ubiquinone) 1 beta subcomplex, 5                               | NM_025316    | 0.236                                     | 0.0036                                                   |



**Table S5.** Continued.

**Upregulated genes (940):**

| <b>Gene Symbol</b> | <b>Gene Name</b>                                                                            | <b>Entrez ID</b> | <b>Fold Change<br/>MECP2-Tg over<br/>WT</b> | <b>FDR-adjusted<br/>p-value<br/>(MECP2-Tg<br/>over WT)</b> |
|--------------------|---------------------------------------------------------------------------------------------|------------------|---------------------------------------------|------------------------------------------------------------|
| Nelf               | nasal embryonic LHRH factor                                                                 | NM_020276        | 0.212                                       | 0.0000                                                     |
| Neu1               | neuraminidase 1                                                                             | NM_010893        | 0.225                                       | 0.0276                                                     |
| Neud4              | neuronal d4 domain family member                                                            | AK142419         | 0.291                                       | 0.0061                                                     |
| Nicn1              | nicolin 1                                                                                   | NM_025449        | 0.217                                       | 0.0169                                                     |
| Nipsnap1           | 4-nitrophenylphosphatase domain and non-neuronal SNAP25-like protein homolog 1 (C. elegans) | NM_008698        | 0.238                                       | 0.0001                                                     |
| Nle1               | notchless homolog 1 (Drosophila)                                                            | AK187952         | 0.214                                       | 0.0064                                                     |
| Nlgn2              | neuroligin 2                                                                                | XM_908969        | 0.220                                       | 0.0010                                                     |
| Nlgn3              | neuroligin 3                                                                                | BC069040         | 0.233                                       | 0.0003                                                     |
| Nol1               | nucleolar protein 1                                                                         | NM_138747        | 0.216                                       | 0.0271                                                     |
| Nol3               | nucleolar protein 3 (apoptosis repressor with CARD domain)                                  | NM_011939        | 0.251                                       | 0.0086                                                     |
| Nope               | neighbor of Punc E11                                                                        | NM_020043        | 0.202                                       | 0.0002                                                     |
| Notch3             | Notch gene homolog 3 (Drosophila)                                                           | NM_008716        | 0.223                                       | 0.0000                                                     |
| Npcd               | NA                                                                                          | NM_030689        | 0.249                                       | 0.0089                                                     |
| Nploc4             | NA                                                                                          | NM_199469        | 0.240                                       | 0.0000                                                     |
| Nptx2              | neuronal pentraxin 2                                                                        | NM_016789        | 0.393                                       | 0.0003                                                     |
| Nr1h2              | nuclear receptor subfamily 1, group H, member 2                                             | XM_001002072     | 0.278                                       | 0.0012                                                     |
| Nr5a1              | nuclear receptor subfamily 5, group A, member 1                                             | D10584           | 0.273                                       | 0.0212                                                     |
| Nras               | neuroblastoma ras oncogene                                                                  | NM_010937        | 0.261                                       | 0.0015                                                     |
| Nrf1               | nuclear respiratory factor 1                                                                | NM_010938        | 0.225                                       | 0.0007                                                     |
| Nsfl1c             | NA                                                                                          | AK039136         | 0.282                                       | 0.0104                                                     |
| Nsg2               | neuron specific gene family member2                                                         | AK160712         | 0.294                                       | 0.0260                                                     |
| Nsun5              | NOL1/NOP2/Sun domain family, member 5                                                       | BC051209         | 0.283                                       | 0.0029                                                     |
| Nt5m               | 5',3'-nucleotidase, mitochondrial                                                           | NM_134029        | 0.221                                       | 0.0189                                                     |
| Ntn2l              | netrin 2-like (chicken)                                                                     | NM_010947        | 0.331                                       | 0.0028                                                     |
| Ntrk3              | neurotrophic tyrosine kinase, receptor, type 3                                              | NM_008746        | 0.267                                       | 0.0000                                                     |
| Nudt21             | nudix (nucleoside diphosphate linked moiety X)-type motif 21                                | XM_974561        | 0.264                                       | 0.0296                                                     |
| Numbl              | numb-like                                                                                   | NM_010950        | 0.274                                       | 0.0002                                                     |
| Nup133             | nucleoporin 133                                                                             | AK040528         | 0.292                                       | 0.0000                                                     |
| Nup85              | NA                                                                                          | NM_001002929     | 0.261                                       | 0.0269                                                     |
| Nxt1               | NTF2-related export protein 1                                                               | NM_019761        | 0.235                                       | 0.0257                                                     |

Table S5. Continued.

Upregulated genes (940):

| Gene Symbol | Gene Name                                                              | Entrez ID    | Fold Change<br><i>MECP2</i> -Tg over<br>WT | FDR-adjusted<br>p-value<br>( <i>MECP2</i> -Tg<br>over WT) |
|-------------|------------------------------------------------------------------------|--------------|--------------------------------------------|-----------------------------------------------------------|
| Ogn         | osteoglycin                                                            | NM_008760    | 0.497                                      | 0.0090                                                    |
| Olfml2a     | olfactomedin-like 2A                                                   | NM_172854    | 0.448                                      | 0.0165                                                    |
| Olfrl258    | NA                                                                     | NM_146978    | 0.238                                      | 0.0339                                                    |
| Olfrl297    | NA                                                                     | AK215451     | 0.208                                      | 0.0364                                                    |
| Orc5l       | origin recognition complex, subunit<br>5-like ( <i>S. cerevisiae</i> ) | NM_011959    | 0.228                                      | 0.0198                                                    |
| ORF61       | open reading frame 61                                                  | BC080302     | 0.349                                      | 0.0000                                                    |
| Osbp        | oxysterol binding protein                                              | XM_982920    | 0.234                                      | 0.0002                                                    |
| P2rx4       | purinergic receptor P2X, ligand-gated<br>ion channel 4                 | NM_011026    | 0.226                                      | 0.0026                                                    |
| P4hb        | prolyl 4-hydroxylase, beta<br>polypeptide                              | NM_011032    | 0.220                                      | 0.0401                                                    |
| Pacsin3     | protein kinase C and casein kinase<br>substrate in neurons 3           | NM_030880    | 0.291                                      | 0.0044                                                    |
| Parc        | p53-associated parkin-like<br>cytoplasmic protein                      | XM_924078    | 0.209                                      | 0.0000                                                    |
| Parp2       | poly (ADP-ribose) polymerase<br>family, member 2                       | NM_009632    | 0.241                                      | 0.0017                                                    |
| Pcdh1       | protocadherin 1                                                        | NM_029357    | 0.513                                      | 0.0108                                                    |
| Pcdhb2      | protocadherin beta 2                                                   | NM_053127    | 0.705                                      | 0.0311                                                    |
| Pcdhb8      | protocadherin beta 8                                                   | NM_053133    | 0.565                                      | 0.0159                                                    |
| Pcdhgc5     | NA                                                                     | NM_033587    | 0.221                                      | 0.0100                                                    |
| Pcmt1       | protein-L-isoaspartate (D-aspartate)<br>O-methyltransferase 1          | NM_008786    | 0.267                                      | 0.0031                                                    |
| Pcnx13      | pecanex-like 3 ( <i>Drosophila</i> )                                   | XM_001005672 | 0.261                                      | 0.0000                                                    |
| Pcolce      | procollagen C-endopeptidase<br>enhancer protein                        | XM_132440    | 0.360                                      | 0.0006                                                    |
| Pcyox1      | prenylcysteine oxidase 1                                               | NM_025823    | 0.248                                      | 0.0092                                                    |
| Pdcd2l      | NA                                                                     | NM_026549    | 0.204                                      | 0.0147                                                    |
| Pde2a       | phosphodiesterase 2A, cGMP-<br>stimulated                              | AK158354     | 0.216                                      | 0.0000                                                    |
| Pde3b       | phosphodiesterase 3B, cGMP-<br>inhibited                               | XM_912421    | 0.208                                      | 0.0080                                                    |
| Pde4a       | phosphodiesterase 4A, cAMP specific                                    | NM_183408    | 0.241                                      | 0.0002                                                    |
| Pde7a       | phosphodiesterase 7A                                                   | BC062909     | 0.287                                      | 0.0068                                                    |
| Pdlim7      | PDZ and LIM domain 7                                                   | AK049902     | 0.297                                      | 0.0022                                                    |
| Perq1       | PERQ amino acid rich, with GYF<br>domain 1                             | NM_031408    | 0.288                                      | 0.0000                                                    |
| Pex7        | peroxisome biogenesis factor 7                                         | NM_008822    | 0.336                                      | 0.0003                                                    |

Table S5. Continued.

Upregulated genes (940):

| Gene Symbol | Gene Name                                                                                                                                | Entrez ID    | Fold Change<br><i>MECP2</i> -Tg over<br>WT | FDR-adjusted<br>p-value<br>( <i>MECP2</i> -Tg<br>over WT) |
|-------------|------------------------------------------------------------------------------------------------------------------------------------------|--------------|--------------------------------------------|-----------------------------------------------------------|
| Pfkl        | phosphofructokinase, liver, B-type                                                                                                       | NM_008826    | 0.323                                      | 0.0013                                                    |
| Pgd         | phosphogluconate dehydrogenase                                                                                                           | XM_001003312 | 0.260                                      | 0.0008                                                    |
| Pgea1       | PKD2 interactor, golgi and<br>endoplasmic reticulum associated 1                                                                         | NM_028634    | 0.256                                      | 0.0009                                                    |
| Pgs1        | NA                                                                                                                                       | AK016901     | 0.376                                      | 0.0009                                                    |
| Phex        | phosphate regulating gene with<br>homologies to endopeptidases on the<br>X chromosome (hypophosphatemia,<br>vitamin D resistant rickets) | NM_011077    | 0.243                                      | 0.0063                                                    |
| Phf8        | PHD finger protein 8                                                                                                                     | AK040969     | 0.204                                      | 0.0004                                                    |
| Phldb1      | pleckstrin homology-like domain,<br>family B, member 1                                                                                   | AK122336     | 0.223                                      | 0.0000                                                    |
| Pick1       | NA                                                                                                                                       | AK090155     | 0.210                                      | 0.0184                                                    |
| Pigo        | phosphatidylinositol glycan, class O                                                                                                     | NM_020035    | 0.250                                      | 0.0000                                                    |
| Pik3cg      | phosphoinositide-3-kinase, catalytic,<br>gamma polypeptide                                                                               | NM_020272    | 0.302                                      | 0.0408                                                    |
| Pik3r3      | phosphatidylinositol 3 kinase,<br>regulatory subunit, polypeptide 3<br>(p55)                                                             | NM_181585    | 0.228                                      | 0.0006                                                    |
| Pim1        | proviral integration site 1                                                                                                              | AK154127     | 0.276                                      | 0.0063                                                    |
| Pim3        | proviral integration site 3                                                                                                              | AK182442     | 0.283                                      | 0.0063                                                    |
| Pink1       | PTEN induced putative kinase 1                                                                                                           | XM_990170    | 0.331                                      | 0.0007                                                    |
| Pip5k1c     | phosphatidylinositol-4-phosphate 5-<br>kinase, type 1 gamma                                                                              | NM_008844    | 0.211                                      | 0.0001                                                    |
| Pip5k2b     | phosphatidylinositol-4-phosphate 5-<br>kinase, type II, beta                                                                             | XM_991611    | 0.266                                      | 0.0323                                                    |
| Pkig        | protein kinase inhibitor, gamma                                                                                                          | AK135505     | 0.310                                      | 0.0404                                                    |
| Pkn1        | protein kinase N1                                                                                                                        | AK171297     | 0.281                                      | 0.0000                                                    |
| Pla2g4c     | phospholipase A2, group IVC<br>(cytosolic, calcium-independent)                                                                          | BC054740     | 0.431                                      | 0.0013                                                    |
| Pla2g6      | phospholipase A2, group VI                                                                                                               | NM_016915    | 0.205                                      | 0.0027                                                    |
| Plcb3       | phospholipase C, beta 3                                                                                                                  | AK047029     | 0.244                                      | 0.0000                                                    |
| Plcx1       | phosphatidylinositol-specific<br>phospholipase C, X domain<br>containing 1                                                               | NM_207279    | 0.310                                      | 0.0192                                                    |
| Plekhq1     | NA                                                                                                                                       | NM_153119    | 0.324                                      | 0.0128                                                    |
| Plxdc1      | plexin domain containing 1                                                                                                               | AK040620     | 0.521                                      | 0.0000                                                    |
| Plxnb1      | plexin B1                                                                                                                                | AK010831     | 0.258                                      | 0.0000                                                    |
| Pnpla2      | patatin-like phospholipase domain<br>containing 2                                                                                        | NM_025802    | 0.252                                      | 0.0026                                                    |

Table S5. Continued.

Upregulated genes (940):

| Gene Symbol | Gene Name                                                                          | Entrez ID | Fold Change<br><i>MECP2</i> -Tg over<br>WT | FDR-adjusted<br>p-value<br>( <i>MECP2</i> -Tg<br>over WT) |
|-------------|------------------------------------------------------------------------------------|-----------|--------------------------------------------|-----------------------------------------------------------|
| Pold2       | polymerase (DNA directed), delta 2, regulatory subunit                             | NM_008894 | 0.262                                      | 0.0003                                                    |
| Poldip2     | polymerase (DNA-directed), delta interacting protein 2                             | NM_026389 | 0.328                                      | 0.0000                                                    |
| Polg        | polymerase (DNA directed), gamma                                                   | AK162462  | 0.208                                      | 0.0001                                                    |
| Polr2b      | polymerase (RNA) II (DNA directed) polypeptide B                                   | NM_153798 | 0.209                                      | 0.0011                                                    |
| Polrmt      | polymerase (RNA) mitochondrial (DNA directed)                                      | NM_172551 | 0.232                                      | 0.0000                                                    |
| Pols        | polymerase (DNA directed) sigma                                                    | NM_198600 | 0.208                                      | 0.0125                                                    |
| Pon2        | paraoxonase 2                                                                      | AK210368  | 0.327                                      | 0.0089                                                    |
| Por         | P450 (cytochrome) oxidoreductase                                                   | NM_008898 | 0.201                                      | 0.0000                                                    |
| Porcn       | porcupine homolog (Drosophila)                                                     | BC027292  | 0.205                                      | 0.0023                                                    |
| Ppan        | peter pan homolog (Drosophila)                                                     | NM_145610 | 0.255                                      | 0.0173                                                    |
| Ppapdc1a    | NA                                                                                 | XM_355946 | 0.201                                      | 0.0106                                                    |
| Ppmla       | protein phosphatase 1A, magnesium dependent, alpha isoform                         | AF369981  | 0.257                                      | 0.0368                                                    |
| Ppox        | protoporphyrinogen oxidase                                                         | AK134341  | 0.298                                      | 0.0000                                                    |
| Ppp1cb      | protein phosphatase 1, catalytic subunit, beta isoform                             | AK089067  | 0.299                                      | 0.0001                                                    |
| Ppp1r12c    | protein phosphatase 1, regulatory (inhibitor) subunit 12C                          | XM_976397 | 0.274                                      | 0.0031                                                    |
| Ppp2r2c     | protein phosphatase 2 (formerly 2A), regulatory subunit B (PR 52), gamma isoform   | NM_172994 | 0.284                                      | 0.0000                                                    |
| Ppp2r4      | protein phosphatase 2A, regulatory subunit B (PR 53)                               | NM_138748 | 0.260                                      | 0.0044                                                    |
| Ppp2r5e     | protein phosphatase 2, regulatory subunit B (B56), epsilon isoform                 | NM_012024 | 0.215                                      | 0.0015                                                    |
| Ppp3r1      | protein phosphatase 3, regulatory subunit B, alpha isoform (calcineurin B, type I) | NM_024459 | 0.437                                      | 0.0025                                                    |
| Ppt2        | palmitoyl-protein thioesterase 2                                                   | NM_152922 | 0.279                                      | 0.0001                                                    |
| Pqlc1       | PQ loop repeat containing 1                                                        | AK017854  | 0.369                                      | 0.0204                                                    |
| Prdx5       | peroxiredoxin 5                                                                    | NM_012021 | 0.231                                      | 0.0058                                                    |
| Prei3       | preimplantation protein 3                                                          | NM_025283 | 0.254                                      | 0.0008                                                    |
| Prkar2a     | protein kinase, cAMP dependent regulatory, type II alpha                           | NM_008924 | 0.314                                      | 0.0001                                                    |
| Prmt7       | NA                                                                                 | NM_145404 | 0.205                                      | 0.0160                                                    |
| Prosl       | protein S (alpha)                                                                  | NM_011173 | 0.266                                      | 0.0012                                                    |

**Table S5.** Continued.

**Upregulated genes (940):**

| <b>Gene Symbol</b> | <b>Gene Name</b>                                                | <b>Entrez ID</b> | <b>Fold Change<br/>MECP2-Tg over<br/>WT</b> | <b>FDR-adjusted<br/>p-value<br/>(MECP2-Tg<br/>over WT)</b> |
|--------------------|-----------------------------------------------------------------|------------------|---------------------------------------------|------------------------------------------------------------|
| Prosap1l           | NA                                                              | NM_197945        | 0.272                                       | 0.0051                                                     |
| Prpf19             | NA                                                              | NM_134129        | 0.297                                       | 0.0023                                                     |
| Psen2              | presenilin 2                                                    | NM_011183        | 0.273                                       | 0.0243                                                     |
| Psmal1             | proteasome (prosome, macropain)<br>subunit, alpha type 1        | AK162439         | 0.358                                       | 0.0001                                                     |
| Psmb2              | proteasome (prosome, macropain)<br>subunit, beta type 2         | NM_011970        | 0.582                                       | 0.0000                                                     |
| Psmc1              | proteasome (prosome, macropain)<br>26S subunit, non-ATPase, 1   | NM_027357        | 0.203                                       | 0.0000                                                     |
| Psmc9              | proteasome (prosome, macropain)<br>26S subunit, non-ATPase, 9   | AK145487         | 0.384                                       | 0.0024                                                     |
| Ptov1              | prostate tumor over expressed gene 1                            | BC062108         | 0.455                                       | 0.0000                                                     |
| Ptpn23             | protein tyrosine phosphatase, non-<br>receptor type 23          | AK173178         | 0.226                                       | 0.0000                                                     |
| Ptprz1             | protein tyrosine phosphatase, receptor<br>type Z, polypeptide 1 | XM_988289        | 0.214                                       | 0.0000                                                     |
| Pwp2               | NA                                                              | BC117903         | 0.203                                       | 0.0018                                                     |
| Pygb               | brain glycogen phosphorylase                                    | NM_153781        | 0.286                                       | 0.0000                                                     |
| Pygl               | liver glycogen phosphorylase                                    | NM_133198        | 0.265                                       | 0.0109                                                     |
| Qtrtd1             | queuine tRNA-ribosyltransferase<br>domain containing 1          | AK015536         | 0.352                                       | 0.0076                                                     |
| Rab25              | RAB25, member RAS oncogene<br>family                            | NM_016899        | 0.387                                       | 0.0311                                                     |
| Rab33b             | RAB33B, member of RAS oncogene<br>family                        | NM_016858        | 0.253                                       | 0.0161                                                     |
| Rab3a              | RAB3A, member RAS oncogene<br>family                            | NM_009001        | 0.316                                       | 0.0275                                                     |
| Ranbp17            | RAN binding protein 17                                          | AK163271         | 0.216                                       | 0.0002                                                     |
| Rapgef1l           | NA                                                              | XM_994457        | 0.237                                       | 0.0015                                                     |
| Rbbp4              | retinoblastoma binding protein 4                                | AK141176         | 0.334                                       | 0.0370                                                     |
| Rbbp7              | retinoblastoma binding protein 7                                | AK132101         | 0.358                                       | 0.0001                                                     |
| Rbm10              | RNA binding motif protein 10                                    | XM_920975        | 0.331                                       | 0.0001                                                     |
| Rbm14              | RNA binding motif protein 14                                    | NM_009032        | 0.214                                       | 0.0490                                                     |
| Rbm18              | RNA binding motif protein 18                                    | AK036220         | 0.305                                       | 0.0166                                                     |
| Rbm39              | NA                                                              | AK155976         | 0.276                                       | 0.0000                                                     |
| Rcc2               | regulator of chromosome<br>condensation 2                       | NM_173867        | 0.283                                       | 0.0000                                                     |
| Rchy1              | ring finger and CHY zinc finger<br>domain containing 1          | AF276959         | 0.394                                       | 0.0199                                                     |

Table S5. Continued.

Upregulated genes (940):

| Gene Symbol   | Gene Name                                                 | Entrez ID    | Fold Change<br><i>MECP2-Tg</i> over<br>WT | FDR-adjusted<br>p-value<br>( <i>MECP2-Tg</i><br>over WT) |
|---------------|-----------------------------------------------------------|--------------|-------------------------------------------|----------------------------------------------------------|
| Rcn2          | reticulocalbin 2                                          | NM_011992    | 0.272                                     | 0.0297                                                   |
| Rdh13         | retinol dehydrogenase 13 (all-trans<br>and 9-cis)         | AK034180     | 0.225                                     | 0.0192                                                   |
| Reep3         | NA                                                        | NM_178606    | 0.240                                     | 0.0022                                                   |
| Rfng          | radical fringe gene homolog<br>(Drosophila)               | NM_009053    | 0.270                                     | 0.0300                                                   |
| Rg9mtd2       | RNA (guanine-9-) methyltransferase<br>domain containing 2 | AK146481     | 0.240                                     | 0.0342                                                   |
| Rhbdd2        | NA                                                        | NM_146002    | 0.212                                     | 0.0220                                                   |
| Rhot2         | ras homolog gene family, member T2                        | BC023927     | 0.346                                     | 0.0000                                                   |
| Rimbp2        | NA                                                        | XM_001002187 | 0.207                                     | 0.0137                                                   |
| Rims4         | regulating synaptic membrane<br>exocytosis 4              | NM_183023    | 0.265                                     | 0.0284                                                   |
| Rin1          | Ras and Rab interactor 1                                  | NM_145495    | 0.264                                     | 0.0240                                                   |
| Ring1         | ring finger protein 1                                     | NM_013543    | 0.318                                     | 0.0040                                                   |
| Rmnd5b        | NA                                                        | NM_025346    | 0.202                                     | 0.0090                                                   |
| Rnf10         | ring finger protein 10                                    | NM_016698    | 0.316                                     | 0.0000                                                   |
| Rnf166        | ring finger protein 166                                   | AK165700     | 0.212                                     | 0.0217                                                   |
| Rnf31         | ring finger protein 31                                    | AK131160     | 0.259                                     | 0.0000                                                   |
| Rnpepl1       | arginyl aminopeptidase<br>(aminopeptidase B)-like 1       | AK138067     | 0.290                                     | 0.0000                                                   |
| RP23-136K12.4 | NA                                                        | AK166638     | 0.235                                     | 0.0011                                                   |
| Rpn1          | ribophorin I                                              | NM_133933    | 0.281                                     | 0.0007                                                   |
| Rragc         | Ras-related GTP binding C                                 | BC037732     | 0.269                                     | 0.0004                                                   |
| Rrp9          | NA                                                        | NM_145620    | 0.210                                     | 0.0086                                                   |
| Rted1         | RNA terminal phosphate cyclase<br>domain 1                | AK190960     | 0.253                                     | 0.0166                                                   |
| Rtn2          | reticulon 2 (Z-band associated<br>protein)                | NM_013648    | 0.265                                     | 0.0000                                                   |
| Sae2          | NA                                                        | NM_016682    | 0.282                                     | 0.0000                                                   |
| Sall2         | sal-like 2 (Drosophila)                                   | NM_015772    | 0.284                                     | 0.0021                                                   |
| Saps1         | NA                                                        | NM_172894    | 0.243                                     | 0.0000                                                   |
| Sbf1          | SET binding factor 1                                      | XM_922582    | 0.268                                     | 0.0000                                                   |
| Scamp4        | secretory carrier membrane protein 4                      | AK078226     | 0.237                                     | 0.0069                                                   |
| Scarbl        | scavenger receptor class B, member 1                      | NM_016741    | 0.272                                     | 0.0001                                                   |
| Scg5          | NA                                                        | NM_009162    | 0.246                                     | 0.0077                                                   |
| Scgn          | secretagogin, EF-hand calcium<br>binding protein          | NM_145399    | 0.379                                     | 0.0347                                                   |

Table S5. Continued.

Upregulated genes (940):

| Gene Symbol | Gene Name                                                                                           | Entrez ID | Fold Change<br><i>MECP2</i> -Tg over<br>WT | FDR-adjusted<br>p-value<br>( <i>MECP2</i> -Tg<br>over WT) |
|-------------|-----------------------------------------------------------------------------------------------------|-----------|--------------------------------------------|-----------------------------------------------------------|
| Scrib       | scribbled homolog (Drosophila)                                                                      | NM_134089 | 0.212                                      | 0.0000                                                    |
| Sdc4        | syndecan 4                                                                                          | BC002312  | 0.325                                      | 0.0185                                                    |
| Sec11a      | NA                                                                                                  | BC010484  | 0.274                                      | 0.0055                                                    |
| Sec14l2     | SEC14-like 2 ( <i>S. cerevisiae</i> )                                                               | NM_144520 | 0.232                                      | 0.0009                                                    |
| Sec23b      | SEC23B ( <i>S. cerevisiae</i> )                                                                     | AK029661  | 0.241                                      | 0.0097                                                    |
| Sec61a1     | Sec61 alpha 1 subunit ( <i>S. cerevisiae</i> )                                                      | AK054318  | 0.280                                      | 0.0020                                                    |
| Serinc3     | NA                                                                                                  | AK145604  | 0.265                                      | 0.0002                                                    |
| Serpina3n   | serine (or cysteine) peptidase<br>inhibitor, clade A, member 3N                                     | NM_009252 | 0.210                                      | 0.0333                                                    |
| Sfi1        | Sfi1 homolog, spindle assembly<br>associated (yeast)                                                | XM_986858 | 0.203                                      | 0.0001                                                    |
| Sfrs1       | splicing factor, arginine/serine-rich 1<br>(ASF/SF2)                                                | NM_173374 | 0.223                                      | 0.0049                                                    |
| Sfrs14      | splicing factor, arginine/serine-rich14                                                             | AK137294  | 0.208                                      | 0.0006                                                    |
| Sfrs2       | splicing factor, arginine/serine-rich 2<br>(SC-35)                                                  | AF250135  | 0.292                                      | 0.0078                                                    |
| Sfrs9       | splicing factor, arginine/serine rich 9                                                             | NM_025573 | 0.539                                      | 0.0000                                                    |
| Sgta        | small glutamine-rich tetratricopeptide<br>repeat (TPR)-containing, alpha                            | NM_024499 | 0.205                                      | 0.0019                                                    |
| Shkbp1      | Sh3kbp1 binding protein 1                                                                           | BC061477  | 0.299                                      | 0.0000                                                    |
| Shq1        | SHQ1 homolog ( <i>S. cerevisiae</i> )                                                               | NM_181590 | 0.274                                      | 0.0187                                                    |
| Sidt2       | SID1 transmembrane family, member<br>2                                                              | AK152371  | 0.258                                      | 0.0000                                                    |
| Sin3a       | transcriptional regulator, SIN3A<br>(yeast)                                                         | NM_011378 | 0.202                                      | 0.0004                                                    |
| Sin3b       | transcriptional regulator, SIN3B<br>(yeast)                                                         | AK173005  | 0.210                                      | 0.0001                                                    |
| Sirt1       | sirtuin 1 ((silent mating type<br>information regulation 2, homolog) 1<br>( <i>S. cerevisiae</i> )) | XM_975350 | 0.214                                      | 0.0451                                                    |
| Skiv2l      | superkiller viralicidic activity 2-like<br>( <i>S. cerevisiae</i> )                                 | NM_021337 | 0.236                                      | 0.0000                                                    |
| Slc13a3     | solute carrier family 13 (sodium-<br>dependent dicarboxylate transporter),<br>member 3              | NM_054055 | 0.296                                      | 0.0159                                                    |
| Slc15a2     | solute carrier family 15 (H <sup>+</sup> /peptide<br>transporter), member 2                         | NM_021301 | 0.348                                      | 0.0000                                                    |
| Slc15a4     | solute carrier family 15, member 4                                                                  | NM_133895 | 0.272                                      | 0.0393                                                    |

**Table S5.** Continued.

**Upregulated genes (940):**

| <b>Gene Symbol</b> | <b>Gene Name</b>                                                                        | <b>Entrez ID</b> | <b>Fold Change<br/><i>MECP2</i>-Tg over<br/>WT</b> | <b>FDR-adjusted<br/>p-value<br/>(<i>MECP2</i>-Tg<br/>over WT)</b> |
|--------------------|-----------------------------------------------------------------------------------------|------------------|----------------------------------------------------|-------------------------------------------------------------------|
| Slc17a7            | solute carrier family 17 (sodium-dependent inorganic phosphate cotransporter), member 7 | AK044409         | 0.270                                              | 0.0000                                                            |
| Slc19a1            | solute carrier family 19 (sodium/hydrogen exchanger), member 1                          | AK138577         | 0.217                                              | 0.0445                                                            |
| Slc20a1            | solute carrier family 20, member 1                                                      | AK089184         | 0.245                                              | 0.0000                                                            |
| Slc22a6            | solute carrier family 22 (organic anion transporter), member 6                          | AK035971         | 0.371                                              | 0.0005                                                            |
| Slc22a8            | solute carrier family 22 (organic anion transporter), member 8                          | NM_031194        | 0.217                                              | 0.0068                                                            |
| Slc24a3            | solute carrier family 24 (sodium/potassium/calcium exchanger), member 3                 | AF314821         | 0.207                                              | 0.0000                                                            |
| Slc25a10           | solute carrier family 25 (mitochondrial carrier, dicarboxylate transporter), member 10  | NM_013770        | 0.244                                              | 0.0075                                                            |
| Slc25a11           | solute carrier family 25 (mitochondrial carrier oxoglutarate carrier), member 11        | AK187524         | 0.350                                              | 0.0035                                                            |
| Slc25a19           | solute carrier family 25 (mitochondrial deoxynucleotide carrier), member 19             | NM_026071        | 0.285                                              | 0.0240                                                            |
| Slc25a21           | solute carrier family 25 (mitochondrial oxodicarboxylate carrier), member 21            | NM_172577        | 0.321                                              | 0.0448                                                            |
| Slc25a46           | NA                                                                                      | NM_026165        | 0.235                                              | 0.0022                                                            |
| Slc27a1            | solute carrier family 27 (fatty acid transporter), member 1                             | AK137700         | 0.273                                              | 0.0000                                                            |
| Slc29a2            | solute carrier family 29 (nucleoside transporters), member 2                            | NM_007854        | 0.245                                              | 0.0400                                                            |
| Slc2a6             | solute carrier family 2 (facilitated glucose transporter), member 6                     | BC025498         | 0.270                                              | 0.0025                                                            |
| Slc2a8             | solute carrier family 2, (facilitated glucose transporter), member 8                    | NM_019488        | 0.249                                              | 0.0040                                                            |
| Slc30a4            | solute carrier family 30 (zinc transporter), member 4                                   | NM_011774        | 0.243                                              | 0.0392                                                            |
| Slc30a5            | solute carrier family 30 (zinc transporter), member 5                                   | AK051654         | 0.295                                              | 0.0000                                                            |
| Slc35c2            | solute carrier family 35, member C2                                                     | AK158331         | 0.217                                              | 0.0035                                                            |
| Slc39a10           | solute carrier family 39 (zinc transporter), member 10                                  | BC052880         | 0.211                                              | 0.0002                                                            |



Table S5. Continued.

Upregulated genes (940):

| Gene Symbol | Gene Name                                                                                                                 | Entrez ID    | Fold Change<br><i>MECP2-Tg</i> over<br>WT | FDR-adjusted<br>p-value<br>( <i>MECP2-Tg</i><br>over WT) |
|-------------|---------------------------------------------------------------------------------------------------------------------------|--------------|-------------------------------------------|----------------------------------------------------------|
| Slc41a3     | solute carrier family 41, member 3                                                                                        | NM_001037493 | 0.245                                     | 0.0149                                                   |
| Slc43a2     | solute carrier family 43, member 2                                                                                        | AK090207     | 0.207                                     | 0.0001                                                   |
| Slc6a12     | solute carrier family 6<br>(neurotransmitter transporter,<br>betaine/GABA), member 12                                     | NM_133661    | 0.247                                     | 0.0356                                                   |
| Slc7a7      | solute carrier family 7 (cationic<br>amino acid transporter, y <sup>+</sup> system),<br>member 7                          | NM_011405    | 0.304                                     | 0.0421                                                   |
| Slc9a3r2    | solute carrier family 9<br>(sodium/hydrogen exchanger),<br>isoform 3 regulator 2                                          | NM_023449    | 0.229                                     | 0.0065                                                   |
| Slc9a7      | NA                                                                                                                        | NM_177353    | 0.204                                     | 0.0009                                                   |
| Smarcad1    | SWI/SNF-related, matrix-associated<br>actin-dependent regulator of<br>chromatin, subfamily a, containing<br>DEAD/H box 1` | NM_007958    | 0.233                                     | 0.0025                                                   |
| Smarcd2     | SWI/SNF related, matrix associated,<br>actin dependent regulator of<br>chromatin, subfamily d, member 2                   | AK159259     | 0.288                                     | 0.0042                                                   |
| Smc3        | NA                                                                                                                        | NM_007790    | 0.237                                     | 0.0000                                                   |
| Smek1       | NA                                                                                                                        | AK031629     | 0.238                                     | 0.0201                                                   |
| Smg5        | NA                                                                                                                        | NM_178246    | 0.295                                     | 0.0000                                                   |
| Smn1        | survival motor neuron 1                                                                                                   | NM_011420    | 0.336                                     | 0.0052                                                   |
| Smox        | spermine oxidase                                                                                                          | AJ567473     | 0.237                                     | 0.0066                                                   |
| Smurf2      | SMAD specific E3 ubiquitin protein<br>ligase 2                                                                            | XM_988429    | 0.279                                     | 0.0000                                                   |
| Snrpd3      | small nuclear ribonucleoprotein D3                                                                                        | NM_026095    | 0.421                                     | 0.0252                                                   |
| Snta1       | syntrophin, acidic 1                                                                                                      | NM_009228    | 0.320                                     | 0.0009                                                   |
| Snx15       | sorting nexin 15                                                                                                          | NM_026912    | 0.207                                     | 0.0351                                                   |
| Snx17       | sorting nexin 17                                                                                                          | NM_153680    | 0.323                                     | 0.0105                                                   |
| Socs7       | suppressor of cytokine signaling 7                                                                                        | NM_138657    | 0.243                                     | 0.0324                                                   |
| Solh        | small optic lobes homolog<br>(Drosophila)                                                                                 | NM_015830    | 0.222                                     | 0.0019                                                   |
| Sorcs2      | sortilin-related VPS10 domain<br>containing receptor 2                                                                    | NM_030889    | 0.258                                     | 0.0000                                                   |
| Sp3         | trans-acting transcription factor 3                                                                                       | BC027797     | 0.210                                     | 0.0391                                                   |
| Spag7       | sperm associated antigen 7                                                                                                | NM_172561    | 0.235                                     | 0.0494                                                   |
| Sparc       | secreted acidic cysteine rich<br>glycoprotein                                                                             | AK082283     | 0.222                                     | 0.0044                                                   |
| Sphk2       | sphingosine kinase 2                                                                                                      | NM_203280    | 0.329                                     | 0.0000                                                   |

Table S5. Continued.

Upregulated genes (940):

| Gene Symbol | Gene Name                                                                 | Entrez ID | Fold Change<br><i>MECP2</i> -Tg over<br>WT | FDR-adjusted<br>p-value<br>( <i>MECP2</i> -Tg<br>over WT) |
|-------------|---------------------------------------------------------------------------|-----------|--------------------------------------------|-----------------------------------------------------------|
| Spnb3       | spectrin beta 3                                                           | NM_021287 | 0.222                                      | 0.0000                                                    |
| Sppl3       | NA                                                                        | BC078437  | 0.289                                      | 0.0001                                                    |
| Spred1      | sprouty protein with EVH-1 domain<br>1, related sequence                  | BC057874  | 0.218                                      | 0.0022                                                    |
| Spsb1       | splA/ryanodine receptor domain and<br>SOCS box containing 1               | NM_029035 | 0.290                                      | 0.0465                                                    |
| Src         | Rous sarcoma oncogene                                                     | AK017629  | 0.208                                      | 0.0017                                                    |
| Srf         | serum response factor                                                     | NM_020493 | 0.274                                      | 0.0001                                                    |
| Sri         | sorcin                                                                    | NM_025618 | 0.217                                      | 0.0009                                                    |
| Ss18l1      | synovial sarcoma translocation gene<br>on chromosome 18-like 1            | NM_178750 | 0.212                                      | 0.0017                                                    |
| Ssr3        | signal sequence receptor, gamma                                           | AK029353  | 0.300                                      | 0.0000                                                    |
| Ssrp1       | structure specific recognition protein<br>1                               | NM_182990 | 0.219                                      | 0.0145                                                    |
| St5         | suppression of tumorigenicity 5                                           | NM_029811 | 0.234                                      | 0.0221                                                    |
| St7         | Suppression of tumorigenicity 7                                           | BC060630  | 0.211                                      | 0.0457                                                    |
| St7l        | suppression of tumorigenicity 7-like                                      | AK172218  | 0.214                                      | 0.0143                                                    |
| St8sia2     | ST8 alpha-N-acetyl-neuraminide<br>alpha-2,8-sialyltransferase 2           | NM_009181 | 0.323                                      | 0.0374                                                    |
| Stab1       | stabilin 1                                                                | NM_138672 | 0.217                                      | 0.0000                                                    |
| Stag3       | stromal antigen 3                                                         | AK145898  | 0.215                                      | 0.0073                                                    |
| Stam        | signal transducing adaptor molecule<br>(SH3 domain and ITAM motif) 1      | AK144987  | 0.261                                      | 0.0002                                                    |
| Statip1     | signal transducer and activator of<br>transcription interacting protein 1 | AK044699  | 0.222                                      | 0.0000                                                    |
| Stau2       | staufer (RNA binding protein)<br>homolog 2 (Drosophila)                   | AF459099  | 0.214                                      | 0.0008                                                    |
| Stk11ip     | serine/threonine kinase 11 interacting<br>protein                         | BC035530  | 0.205                                      | 0.0001                                                    |
| Stk25       | serine/threonine kinase 25 (yeast)                                        | NM_021537 | 0.262                                      | 0.0065                                                    |
| Stk40       | serine/threonine kinase 40                                                | NM_028800 | 0.240                                      | 0.0053                                                    |
| Stmn3       | stathmin-like 3                                                           | AK149129  | 0.453                                      | 0.0135                                                    |
| Strn4       | striatin, calmodulin binding protein 4                                    | NM_133789 | 0.289                                      | 0.0000                                                    |
| Stub1       | STIP1 homology and U-Box<br>containing protein 1                          | NM_019719 | 0.282                                      | 0.0400                                                    |
| Stx18       | syntaxin 18                                                               | AK169273  | 0.265                                      | 0.0025                                                    |
| Stxbp4      | syntaxin binding protein 4                                                | AK012293  | 0.231                                      | 0.0143                                                    |
| Sucla2      | succinate-Coenzyme A ligase, ADP-<br>forming, beta subunit                | NM_011506 | 0.243                                      | 0.0049                                                    |

**Table S5.** Continued.

**Upregulated genes (940):**

| <b>Gene Symbol</b> | <b>Gene Name</b>                                                               | <b>Entrez ID</b> | <b>Fold Change<br/>MECP2-Tg over<br/>WT</b> | <b>FDR-adjusted<br/>p-value<br/>(MECP2-Tg<br/>over WT)</b> |
|--------------------|--------------------------------------------------------------------------------|------------------|---------------------------------------------|------------------------------------------------------------|
| Suds3              | NA                                                                             | NM_178622        | 0.273                                       | 0.0069                                                     |
| Sufu               | suppressor of fused homolog<br>(Drosophila)                                    | NM_001025391     | 0.225                                       | 0.0473                                                     |
| Sumf2              | sulfatase modifying factor 2                                                   | NM_026445        | 0.268                                       | 0.0283                                                     |
| Supt3h             | suppressor of Ty 3 homolog (S.<br>cerevisiae)                                  | BC096051         | 0.231                                       | 0.0283                                                     |
| Svop               | NA                                                                             | NM_026805        | 0.246                                       | 0.0000                                                     |
| Sybl1              | synaptobrevin like 1                                                           | NM_011515        | 0.241                                       | 0.0045                                                     |
| Syn2               | synapsin II                                                                    | BC053427         | 0.239                                       | 0.0000                                                     |
| Syt13              | synaptotagmin XIII                                                             | AK129357         | 0.243                                       | 0.0025                                                     |
| Tada3l             | transcriptional adaptor 3 (NGG1<br>homolog, yeast)-like                        | NM_133932        | 0.291                                       | 0.0007                                                     |
| Taf6               | TAF6 RNA polymerase II, TATA<br>box binding protein (TBP)-associated<br>factor | NM_009315        | 0.298                                       | 0.0003                                                     |
| Tapbp              | TAP binding protein                                                            | NM_001025313     | 0.219                                       | 0.0014                                                     |
| Tarsl1             | threonyl-tRNA synthetase-like 1                                                | NM_027931        | 0.206                                       | 0.0230                                                     |
| Taz                | tafazzin                                                                       | AK183640         | 0.239                                       | 0.0098                                                     |
| Tbc1d14            | TBC1 domain family, member 14                                                  | XM_993814        | 0.230                                       | 0.0181                                                     |
| Tbc1d22a           | TBC1 domain family, member 22a                                                 | NM_145476        | 0.245                                       | 0.0012                                                     |
| Tbc1d22b           | NA                                                                             | XM_993756        | 0.211                                       | 0.0001                                                     |
| Tbcd               | tubulin-specific chaperone d                                                   | NM_029878        | 0.207                                       | 0.0000                                                     |
| Tbkbp1             | NA                                                                             | NM_198100        | 0.327                                       | 0.0000                                                     |
| Tbl1xr1            | transducin (beta)-like 1X-linked<br>receptor 1                                 | AK140144         | 0.278                                       | 0.0000                                                     |
| Tcea1              | transcription elongation factorA(SII)1                                         | D00925           | 0.230                                       | 0.0076                                                     |
| Tcfcp2             | transcription factor CP2                                                       | AK147898         | 0.214                                       | 0.0117                                                     |
| Tcfe2a             | transcription factor E2a                                                       | NM_011548        | 0.202                                       | 0.0003                                                     |
| Tdh                | L-threonine dehydrogenase                                                      | XR_002703        | 0.362                                       | 0.0068                                                     |
| Tdpoz4             | NA                                                                             | NM_207272        | 0.458                                       | 0.0455                                                     |
| Tesc               | NA                                                                             | NM_021344        | 0.375                                       | 0.0244                                                     |
| Tesk1              | testis specific protein kinase 1                                               | NM_011571        | 0.215                                       | 0.0113                                                     |
| Tfip11             | tuftelin interacting protein 11                                                | NM_018783        | 0.246                                       | 0.0010                                                     |
| Tfpt               | TCF3 (E2A) fusion partner                                                      | NM_023524        | 0.310                                       | 0.0008                                                     |
| Thap7              | THAP domain containing 7                                                       | AK007329         | 0.402                                       | 0.0277                                                     |
| Thg11              | NA                                                                             | BC092541         | 0.243                                       | 0.0366                                                     |
| Timm44             | translocator of inner mitochondrial<br>membrane 44                             | NM_011592        | 0.282                                       | 0.0001                                                     |

**Table S5.** Continued.

**Upregulated genes (940):**

| <b>Gene Symbol</b> | <b>Gene Name</b>                                                     | <b>Entrez ID</b> | <b>Fold Change<br/><i>MECP2</i>-Tg over<br/>WT</b> | <b>FDR-adjusted<br/>p-value<br/>(<i>MECP2</i>-Tg<br/>over WT)</b> |
|--------------------|----------------------------------------------------------------------|------------------|----------------------------------------------------|-------------------------------------------------------------------|
| Tjap1              | NA                                                                   | NM_028751        | 0.262                                              | 0.0023                                                            |
| Tle3               | transducin-like enhancer of split 3,<br>homolog of Drosophila E(spl) | AK122524         | 0.279                                              | 0.0003                                                            |
| Tlk2               | tousled-like kinase 2 (Arabidopsis)                                  | BC066198         | 0.209                                              | 0.0011                                                            |
| Tm7sf3             | transmembrane 7 superfamily<br>member 3                              | NM_026281        | 0.228                                              | 0.0002                                                            |
| Tmcc2              | transmembrane and coiled-coil<br>domains 2                           | AK172720         | 0.211                                              | 0.0032                                                            |
| Tmco6              | NA                                                                   | AK046207         | 0.253                                              | 0.0083                                                            |
| Tmed4              | transmembrane emp24 protein<br>transport domain containing 4         | NM_134020        | 0.228                                              | 0.0382                                                            |
| Tmem1              | transmembrane protein 1                                              | XM_359259        | 0.225                                              | 0.0000                                                            |
| Tmem106b           | NA                                                                   | AK018015         | 0.325                                              | 0.0001                                                            |
| Tmem143            | NA                                                                   | AK010209         | 0.240                                              | 0.0223                                                            |
| Tmem145            | NA                                                                   | BC058129         | 0.259                                              | 0.0013                                                            |
| Tmem161a           | NA                                                                   | NM_145597        | 0.229                                              | 0.0032                                                            |
| Tmem161b           | NA                                                                   | BC060067         | 0.221                                              | 0.0385                                                            |
| Tmem164            | NA                                                                   | AK081890         | 0.249                                              | 0.0011                                                            |
| Tmem167            | NA                                                                   | AK019962         | 0.273                                              | 0.0137                                                            |
| Tmem175            | NA                                                                   | AK076446         | 0.304                                              | 0.0063                                                            |
| Tmem183a           | NA                                                                   | AK006183         | 0.246                                              | 0.0008                                                            |
| Tmem25             | transmembrane protein 25                                             | NM_027865        | 0.241                                              | 0.0020                                                            |
| Tmem45b            | transmembrane protein 45b                                            | NM_144936        | 0.455                                              | 0.0312                                                            |
| Tmem55a            | transmembrane protein 55A                                            | NM_028264        | 0.256                                              | 0.0178                                                            |
| Tmem8              | transmembrane protein 8 (five<br>membrane-spanning domains)          | AK079893         | 0.224                                              | 0.0115                                                            |
| Tnrc4              | trinucleotide repeat containing 4                                    | AK030259         | 0.281                                              | 0.0001                                                            |
| Tns3               | tensin 3                                                             | XM_990368        | 0.347                                              | 0.0000                                                            |
| Tomm70a            | translocase of outer mitochondrial<br>membrane 70 homolog A (yeast)  | BC057096         | 0.265                                              | 0.0205                                                            |
| Tor1a              | torsin family 1, member A (torsin A)                                 | NM_144884        | 0.276                                              | 0.0358                                                            |
| Trabd              | NA                                                                   | NM_001002005     | 0.218                                              | 0.0020                                                            |
| Trap1              | TNF receptor-associated protein 1                                    | AK178868         | 0.248                                              | 0.0128                                                            |
| Trappc2            | trafficking protein particle complex 2                               | NM_025432        | 0.320                                              | 0.0063                                                            |
| Trappc4            | trafficking protein particle complex 4                               | AK005276         | 0.309                                              | 0.0289                                                            |
| Trappc6b           | trafficking protein particle complex<br>6B                           | AK037638         | 0.278                                              | 0.0374                                                            |
| Trim23             | tripartite motif protein 23                                          | AK039280         | 0.265                                              | 0.0017                                                            |

Table S5. Continued.

Upregulated genes (940):

| Gene Symbol | Gene Name                                                               | Entrez ID    | Fold Change<br><i>MECP2-Tg</i> over<br>WT | FDR-adjusted<br>p-value<br>( <i>MECP2-Tg</i><br>over WT) |
|-------------|-------------------------------------------------------------------------|--------------|-------------------------------------------|----------------------------------------------------------|
| Trim28      | tripartite motif protein 28                                             | NM_011588    | 0.238                                     | 0.0000                                                   |
| Trim3       | tripartite motif protein 3                                              | XM_001000076 | 0.304                                     | 0.0003                                                   |
| Trp53i11    | Trp53 inducible protein 11                                              | BC024710     | 0.253                                     | 0.0070                                                   |
| Trp53inp1   | transformation related protein 53<br>inducible nuclear protein 1        | NM_021897    | 0.371                                     | 0.0467                                                   |
| Trpt1       | NA                                                                      | AK038830     | 0.239                                     | 0.0483                                                   |
| Tsen54      | tRNA splicing endonuclease 54<br>homolog (SEN54, <i>S. cerevisiae</i> ) | NM_029557    | 0.208                                     | 0.0237                                                   |
| Tsg101      | tumor susceptibility gene 101                                           | NM_021884    | 0.205                                     | 0.0249                                                   |
| Tsta3       | tissue specific transplantation antigen<br>P35B                         | NM_031201    | 0.294                                     | 0.0189                                                   |
| Ttyh1       | tweety homolog 1 ( <i>Drosophila</i> )                                  | AK031550     | 0.303                                     | 0.0000                                                   |
| Tubgcp2     | tubulin, gamma complex associated<br>protein 2                          | NM_133755    | 0.203                                     | 0.0044                                                   |
| Tubgcp6     | NA                                                                      | AK052441     | 0.565                                     | 0.0289                                                   |
| Tusc4       | tumor suppressor candidate 4                                            | NM_018879    | 0.284                                     | 0.0037                                                   |
| Txndc5      | thioredoxin domain containing 5                                         | NM_145367    | 0.297                                     | 0.0286                                                   |
| Txnrd2      | thioredoxin reductase 2                                                 | NM_013711    | 0.218                                     | 0.0289                                                   |
| Ube2g2      | ubiquitin-conjugating enzyme E2G 2                                      | NM_019803    | 0.354                                     | 0.0045                                                   |
| Ube2m       | ubiquitin-conjugating enzyme E2M<br>(UBC12 homolog, yeast)              | NM_145578    | 0.216                                     | 0.0017                                                   |
| Ube2q1      | NA                                                                      | BC082275     | 0.208                                     | 0.0052                                                   |
| Ube3a       | ubiquitin protein ligase E3A                                            | AK018028     | 0.202                                     | 0.0145                                                   |
| Ube3b       | ubiquitin protein ligase E3B                                            | AK216199     | 0.235                                     | 0.0000                                                   |
| Ube3c       | ubiquitin protein ligase E3C                                            | NM_133907    | 0.210                                     | 0.0001                                                   |
| Ubqln4      | ubiquilin 4                                                             | NM_033526    | 0.230                                     | 0.0000                                                   |
| Ubx2        | UBX domain containing 2                                                 | NM_026390    | 0.228                                     | 0.0001                                                   |
| Uck1        | uridine-cytidine kinase 1                                               | NM_011675    | 0.275                                     | 0.0024                                                   |
| Unc50       | unc-50 homolog ( <i>C. elegans</i> )                                    | NM_026123    | 0.297                                     | 0.0193                                                   |
| Unc5b       | unc-5 homolog B ( <i>C. elegans</i> )                                   | NM_029770    | 0.211                                     | 0.0012                                                   |
| Upf1        | NA                                                                      | AK046599     | 0.247                                     | 0.0000                                                   |
| Uqcrc2      | ubiquinol cytochrome c reductase<br>core protein 2                      | NM_025899    | 0.284                                     | 0.0003                                                   |
| Usf2        | upstream transcription factor 2                                         | NM_011680    | 0.234                                     | 0.0065                                                   |
| Usp37       | ubiquitin specific peptidase 37                                         | AK173210     | 0.229                                     | 0.0001                                                   |
| Usp47       | ubiquitin specific peptidase 47                                         | NM_133758    | 0.231                                     | 0.0000                                                   |
| Usp5        | ubiquitin specific peptidase 5<br>(isopeptidase T)                      | NM_013700    | 0.218                                     | 0.0019                                                   |

Table S5. Continued.

Upregulated genes (940):

| Gene Symbol | Gene Name                                                       | Entrez ID    | Fold Change<br><i>MECP2-Tg</i> over<br>WT | FDR-adjusted<br>p-value<br>( <i>MECP2-Tg</i><br>over WT) |
|-------------|-----------------------------------------------------------------|--------------|-------------------------------------------|----------------------------------------------------------|
| Vapb        | vesicle-associated membrane protein, associated protein B and C | NM_019806    | 0.253                                     | 0.0304                                                   |
| Vash1       | vasohibin 1                                                     | BC086688     | 0.231                                     | 0.0024                                                   |
| Vav1        | vav 1 oncogene                                                  | NM_011691    | 0.203                                     | 0.0189                                                   |
| Vim         | vimentin                                                        | BC089335     | 0.253                                     | 0.0006                                                   |
| Vipr2       | vasoactive intestinal peptide receptor 2                        | NM_009511    | 0.271                                     | 0.0491                                                   |
| Vps26b      | NA                                                              | NM_178027    | 0.275                                     | 0.0035                                                   |
| Vps36       | vacuolar protein sorting 36 (yeast)                             | AK005810     | 0.334                                     | 0.0000                                                   |
| Wars        | tryptophanyl-tRNA synthetase                                    | AK190440     | 0.265                                     | 0.0437                                                   |
| Wdhd1       | WD repeat and HMG-box DNA binding protein 1                     | AK052690     | 0.229                                     | 0.0076                                                   |
| Wdr13       | WD repeat domain 13                                             | NM_026137    | 0.299                                     | 0.0000                                                   |
| Wdr3        | WD repeat domain 3                                              | NM_175552    | 0.222                                     | 0.0002                                                   |
| Wdr34       | WD repeat domain 34                                             | NM_001008498 | 0.216                                     | 0.0006                                                   |
| Wdr36       | WD repeat domain 36                                             | AK156822     | 0.209                                     | 0.0017                                                   |
| Wdr4        | WD repeat domain 4                                              | NM_021322    | 0.298                                     | 0.0009                                                   |
| Wdr40a      | WD repeat domain 40A                                            | AK083369     | 0.260                                     | 0.0137                                                   |
| Wdr6        | WD repeat domain 6                                              | NM_031392    | 0.269                                     | 0.0001                                                   |
| Wdr74       | WD repeat domain 74                                             | NM_134139    | 0.269                                     | 0.0136                                                   |
| Wdr82       | NA                                                              | BC019115     | 0.305                                     | 0.0001                                                   |
| Wrb         | tryptophan rich basic protein                                   | AK021091     | 0.322                                     | 0.0092                                                   |
| Wwp2        | WW domain containing E3 ubiquitin protein ligase 2              | AK141281     | 0.210                                     | 0.0001                                                   |
| Xab1        | XPA binding protein 1                                           | BC020174     | 0.299                                     | 0.0022                                                   |
| Xbp1        | X-box binding protein 1                                         | NM_013842    | 0.209                                     | 0.0067                                                   |
| Xpnpep3     | NA                                                              | AK035269     | 0.247                                     | 0.0036                                                   |
| Xpo7        | exportin 7                                                      | NM_023045    | 0.210                                     | 0.0000                                                   |
| Yif1b       | Yip1 interacting factor homolog B (S. cerevisiae)               | NM_029887    | 0.299                                     | 0.0014                                                   |
| Ypel2       | yippee-like 2 (Drosophila)                                      | NM_001005341 | 0.258                                     | 0.0076                                                   |
| Zbtb33      | zinc finger and BTB domain containing 33                        | NM_020256    | 0.541                                     | 0.0425                                                   |
| Zc3h7b      | NA                                                              | AK129268     | 0.226                                     | 0.0000                                                   |
| Zdhhc16     | zinc finger, DHHC domain containing 16                          | AK005255     | 0.218                                     | 0.0304                                                   |
| Zfp179      | zinc finger protein 179                                         | AK131651     | 0.203                                     | 0.0005                                                   |
| Zfp251      | zinc finger protein 251                                         | AK047148     | 0.262                                     | 0.0435                                                   |

Table S5. Continued.

Upregulated genes (940):

| Gene Symbol | Gene Name                                     | Entrez ID    | Fold Change<br><i>MECP2-Tg</i> over<br>WT | FDR-adjusted<br>p-value<br>( <i>MECP2-Tg</i><br>over WT) |
|-------------|-----------------------------------------------|--------------|-------------------------------------------|----------------------------------------------------------|
| Zfp276      | zinc finger protein (C2H2 type) 276           | BC048688     | 0.275                                     | 0.0003                                                   |
| Zfp469      | zinc finger protein 469                       | NM_178242    | 0.297                                     | 0.0000                                                   |
| Zfp68       | zinc finger protein 68                        | NM_001044747 | 0.270                                     | 0.0168                                                   |
| Zfp687      | zinc finger protein 687                       | NM_030074    | 0.313                                     | 0.0001                                                   |
| Zfp692      | zinc finger protein 692                       | NM_182996    | 0.217                                     | 0.0024                                                   |
| Zfp11       | zinc finger like protein 1                    | NM_024231    | 0.254                                     | 0.0157                                                   |
| Zfx         | zinc finger protein X-linked                  | L19714       | 0.211                                     | 0.0124                                                   |
| Zfyve27     | zinc finger, FYVE domain containing<br>27     | NM_177319    | 0.243                                     | 0.0000                                                   |
| Zgpat       | zinc finger, CCCH-type with G patch<br>domain | NM_144894    | 0.243                                     | 0.0029                                                   |
| Zmiz2       | NA                                            | NM_001005867 | 0.209                                     | 0.0010                                                   |
| Zyx         | zyxin                                         | BC054775     | 0.219                                     | 0.0405                                                   |

Downregulated genes (247):

| Gene Symbol   | Gene Name                  | Entrez ID | Fold Change<br><i>MECP2-Tg</i> over<br>WT | FDR-adjusted<br>p-value<br>( <i>MECP2-Tg</i><br>over WT) |
|---------------|----------------------------|-----------|-------------------------------------------|----------------------------------------------------------|
| 1700015C15Rik | RIKEN cDNA 1700015C15 gene | AK005986  | -1.090                                    | 0.0313                                                   |
| 1700034O15Rik | RIKEN cDNA 1700034O15 gene | NM_029671 | -0.641                                    | 0.0350                                                   |
| 1700041C23Rik | NA                         | AK006669  | -0.738                                    | 0.0407                                                   |
| 1700051A21Rik | NA                         | AK035540  | -0.338                                    | 0.0398                                                   |
| 1700052K07Rik | NA                         | AK006770  | -0.427                                    | 0.0354                                                   |
| 1810054D07Rik | RIKEN cDNA 1810054D07 gene | AK049108  | -0.222                                    | 0.0010                                                   |
| 2010110K18Rik | NA                         | AK029153  | -0.208                                    | 0.0323                                                   |
| 3300002A11Rik | RIKEN cDNA 3300002A11 gene | AK014365  | -0.302                                    | 0.0358                                                   |
| 4732479N06Rik | RIKEN cDNA 4732479N06 gene | AK129030  | -0.208                                    | 0.0200                                                   |
| 4930478L05Rik | RIKEN cDNA 4930478L05 gene | AK030550  | -0.335                                    | 0.0361                                                   |
| 4930519B02Rik | RIKEN cDNA 4930519B02 gene | XM_125512 | -0.239                                    | 0.0308                                                   |
| 4930535O05Rik | NA                         | AK015983  | -0.309                                    | 0.0476                                                   |
| 4930542N06Rik | RIKEN cDNA 4930542N06 gene | AK051451  | -0.412                                    | 0.0475                                                   |
| 6330527O06Rik | RIKEN cDNA 6330527O06 gene | NM_029530 | -0.371                                    | 0.0100                                                   |
| 6330577E15Rik | RIKEN cDNA 6330577E15 gene | NM_026377 | -0.240                                    | 0.0180                                                   |
| 7530416G11Rik | NA                         | AK078701  | -0.238                                    | 0.0221                                                   |
| 9430070O13Rik | RIKEN cDNA 9430070O13 gene | AK020482  | -0.390                                    | 0.0051                                                   |

Table S5. Continued.

Downregulated genes (247):

| Gene Symbol   | Gene Name                                                                             | Entrez ID    | Fold Change<br><i>MECP2</i> -Tg over<br>WT | FDR-adjusted<br>p-value<br>( <i>MECP2</i> -Tg<br>over WT) |
|---------------|---------------------------------------------------------------------------------------|--------------|--------------------------------------------|-----------------------------------------------------------|
| A830006F12Rik | RIKEN cDNA A830006F12 gene                                                            | AK083856     | -0.296                                     | 0.0038                                                    |
| Abca15        | NA                                                                                    | AK029712     | -0.219                                     | 0.0294                                                    |
| Abcb1a        | ATP-binding cassette, sub-family B (MDR/TAP), member 1A                               | NM_011076    | -0.271                                     | 0.0001                                                    |
| Abcc4         | ATP-binding cassette, sub-family C (CFTR/MRP), member 4                               | NM_001033336 | -0.269                                     | 0.0000                                                    |
| Abcd2         | ATP-binding cassette, sub-family D (ALD), member 2                                    | NM_011994    | -0.237                                     | 0.0177                                                    |
| Ablim1        | actin-binding LIM protein 1                                                           | AK171860     | -0.245                                     | 0.0000                                                    |
| Acvr1c        | activin A receptor, type IC                                                           | NM_001033369 | -0.508                                     | 0.0000                                                    |
| Adam29        | NA                                                                                    | NM_175939    | -0.624                                     | 0.0421                                                    |
| Adamts13      | NA                                                                                    | AB071302     | -0.227                                     | 0.0080                                                    |
| Adamts3       | NA                                                                                    | XM_977798    | -0.259                                     | 0.0020                                                    |
| Adrbk2        | adrenergic receptor kinase, beta 2                                                    | NM_177078    | -0.244                                     | 0.0014                                                    |
| Aire          | autoimmune regulator (autoimmune polyendocrinopathy candidiasis ectodermal dystrophy) | NM_009646    | -0.214                                     | 0.0293                                                    |
| AK220484      | cDNA sequence AK220484                                                                | XM_977373    | -0.283                                     | 0.0001                                                    |
| Anub1l        | AN1, ubiquitin-like, homolog ( <i>Xenopus laevis</i> )                                | BC019579     | -0.303                                     | 0.0006                                                    |
| Apbb2         | amyloid beta (A4) precursor protein-binding, family B, member 2                       | BC038035     | -0.206                                     | 0.0028                                                    |
| Arhgap21      | Rho GTPase activating protein 21                                                      | AK122508     | -0.218                                     | 0.0020                                                    |
| Arhgap22      | Rho GTPase activating protein 22                                                      | NM_153800    | -0.212                                     | 0.0068                                                    |
| Arhgef6       | Rac/Cdc42 guanine nucleotide exchange factor (GEF) 6                                  | AK016387     | -0.213                                     | 0.0342                                                    |
| Atp10d        | ATPase, Class V, type 10D                                                             | AK085120     | -0.280                                     | 0.0000                                                    |
| Atp2b1        | ATPase, Ca <sup>++</sup> transporting, plasma membrane 1                              | NM_026482    | -0.233                                     | 0.0000                                                    |
| Atxn7l1       | ataxin 7-like 1                                                                       | NM_001033436 | -0.323                                     | 0.0110                                                    |
| B230208N19Rik | RIKEN cDNA B230208N19 gene                                                            | NM_008069    | -0.214                                     | 0.0065                                                    |
| B230220E17Rik | RIKEN cDNA B230220E17 gene                                                            | XM_354862    | -0.254                                     | 0.0008                                                    |
| Baz2b         | NA                                                                                    | AK147737     | -0.301                                     | 0.0000                                                    |
| BC003331      | cDNA sequence BC003331                                                                | NM_145511    | -0.238                                     | 0.0017                                                    |
| BC026657      | cDNA sequence BC026657                                                                | XM_912620    | -0.293                                     | 0.0016                                                    |
| BC030499      | cDNA sequence BC030499                                                                | BC030499     | -0.325                                     | 0.0310                                                    |
| BC033606      | cDNA sequence BC033606                                                                | XM_911052    | -0.220                                     | 0.0484                                                    |
| BC055107      | cDNA sequence BC055107                                                                | NM_183187    | -0.206                                     | 0.0243                                                    |



**Table S5.** Continued.

**Downregulated genes (247):**

| <b>Gene Symbol</b> | <b>Gene Name</b>                                            | <b>Entrez ID</b> | <b>Fold Change<br/>MECP2-Tg over<br/>WT</b> | <b>FDR-adjusted<br/>p-value<br/>(MECP2-Tg<br/>over WT)</b> |
|--------------------|-------------------------------------------------------------|------------------|---------------------------------------------|------------------------------------------------------------|
| Bmf                | Bcl2 modifying factor                                       | AK089218         | -0.245                                      | 0.0347                                                     |
| C920006C10Rik      | RIKEN cDNA C920006C10 gene                                  | AK030074         | -0.235                                      | 0.0000                                                     |
| Cab39l             | calcium binding protein 39-like                             | BC034159         | -0.438                                      | 0.0003                                                     |
| Cacnb2             | calcium channel, voltage-dependent,<br>beta 2 subunit       | L20343           | -0.249                                      | 0.0009                                                     |
| Cacng2             | calcium channel, voltage-dependent,<br>gamma subunit 2      | AK164203         | -0.391                                      | 0.0199                                                     |
| Capn8              | calpain 8                                                   | NM_130890        | -0.210                                      | 0.0389                                                     |
| Car7               | carbonic anhydrase 7                                        | NM_053070        | -0.306                                      | 0.0306                                                     |
| Cat                | catalase                                                    | AK183520         | -0.226                                      | 0.0000                                                     |
| Cd6                | CD6 antigen                                                 | NM_001037801     | -0.289                                      | 0.0003                                                     |
| Cdh15              | cadherin 15                                                 | XM_001002605     | -0.281                                      | 0.0413                                                     |
| Cdkl4              | cyclin-dependent kinase-like 4                              | NM_001033443     | -0.414                                      | 0.0053                                                     |
| Cit                | citron                                                      | AK145037         | -0.210                                      | 0.0000                                                     |
| Clmn               | calmin                                                      | NM_053155        | -0.236                                      | 0.0004                                                     |
| Cobl1l             | Cobl-like 1                                                 | AK037010         | -0.304                                      | 0.0055                                                     |
| Col19a1            | procollagen, type XIX, alpha 1                              | AK019854         | -0.253                                      | 0.0001                                                     |
| Col24a1            | procollagen, type XXIV, alpha 1                             | BC092542         | -0.222                                      | 0.0001                                                     |
| Creb5              | cAMP responsive element binding<br>protein 5                | AK170766         | -0.371                                      | 0.0108                                                     |
| Ctps2              | cytidine 5'-triphosphate synthase 2                         | AK085381         | -0.210                                      | 0.0046                                                     |
| Cutl2              | cut-like 2 (Drosophila)                                     | NM_007804        | -0.216                                      | 0.0000                                                     |
| Cyp4v3             | cytochrome P450, family 4,<br>subfamily v, polypeptide 3    | NM_133969        | -0.265                                      | 0.0134                                                     |
| D430015B01Rik      | RIKEN cDNA D430015B01 gene                                  | NM_153574        | -0.250                                      | 0.0018                                                     |
| Ddef1              | development and differentiation<br>enhancing                | XM_977047        | -0.234                                      | 0.0000                                                     |
| Depdc6             | DEP domain containing 6                                     | AK145208         | -0.317                                      | 0.0009                                                     |
| Dmbt1              | deleted in malignant brain tumors 1                         | NM_007769        | -0.234                                      | 0.0015                                                     |
| Dnahc5             | dynein, axonemal, heavy chain 5                             | NM_133365        | -0.204                                      | 0.0000                                                     |
| Dock4              | dedicator of cytokinesis 4                                  | AK031713         | -0.208                                      | 0.0000                                                     |
| Dock9              | dedicator of cytokinesis 9                                  | AK034324         | -0.254                                      | 0.0000                                                     |
| Dst                | dystonin                                                    | DQ023311         | -0.243                                      | 0.0000                                                     |
| Dync1i1            | NA                                                          | NM_010063        | -0.213                                      | 0.0016                                                     |
| Ebfl               | early B-cell factor 1                                       | NM_007897        | -0.278                                      | 0.0075                                                     |
| EG216818           | NA                                                          | XM_001001019     | -0.429                                      | 0.0286                                                     |
| Eltd1              | EGF, latrophilin seven<br>transmembrane domain containing 1 | NM_133222        | -0.283                                      | 0.0031                                                     |

**Table S5.** Continued.

**Downregulated genes (247):**

| <b>Gene Symbol</b> | <b>Gene Name</b>                                                                            | <b>Entrez ID</b> | <b>Fold Change<br/>MECP2-Tg over<br/>WT</b> | <b>FDR-adjusted<br/>p-value<br/>(MECP2-Tg<br/>over WT)</b> |
|--------------------|---------------------------------------------------------------------------------------------|------------------|---------------------------------------------|------------------------------------------------------------|
| Emb                | embigin                                                                                     | AK148540         | -0.280                                      | 0.0001                                                     |
| Enpp1              | ectonucleotide<br>pyrophosphatase/phosphodiesterase 1                                       | NM_008813        | -0.203                                      | 0.0113                                                     |
| Epb4.113           | erythrocyte protein band 4.1-like 3                                                         | AK173080         | -0.298                                      | 0.0000                                                     |
| Epb4.114a          | erythrocyte protein band 4.1-like 4a                                                        | BC089158         | -0.239                                      | 0.0002                                                     |
| Eps15              | epidermal growth factor receptor<br>pathway substrate 15                                    | NM_007943        | -0.204                                      | 0.0001                                                     |
| ErbB4              | v-erb-a erythroblastic leukemia viral<br>oncogene homolog 4 (avian)                         | XM_993491        | -0.286                                      | 0.0000                                                     |
| Erg                | avian erythroblastosis virus E-26 (v-<br>ets) oncogene related                              | AK050922         | -0.298                                      | 0.0134                                                     |
| Esrrg              | estrogen-related receptor gamma                                                             | NM_011935        | -0.352                                      | 0.0008                                                     |
| Extl2              | exotoses (multiple)-like 2                                                                  | AF200973         | -0.348                                      | 0.0023                                                     |
| Fat1               | NA                                                                                          | XM_896341        | -0.210                                      | 0.0004                                                     |
| Fbn1               | fibrillin 1                                                                                 | AF007248         | -0.205                                      | 0.0000                                                     |
| Fbxl21             | F-box and leucine-rich repeat protein<br>21                                                 | NM_178674        | -0.280                                      | 0.0379                                                     |
| Fbxo8              | F-box only protein 8                                                                        | NM_015791        | -0.207                                      | 0.0075                                                     |
| Fcrl1              | Fc receptor-like 1                                                                          | AK041750         | -0.340                                      | 0.0206                                                     |
| Fgd6               | FYVE, RhoGEF and PH domain<br>containing 6                                                  | NM_053072        | -0.244                                      | 0.0375                                                     |
| Fgf12              | fibroblast growth factor 12                                                                 | AK148215         | -0.245                                      | 0.0009                                                     |
| Fgfr2              | fibroblast growth factor receptor 2                                                         | NM_010207        | -0.213                                      | 0.0010                                                     |
| Fmn1               | formin 1                                                                                    | NM_010230        | -0.214                                      | 0.0082                                                     |
| Fnbp1              | formin binding protein 1                                                                    | NM_001038700     | -0.230                                      | 0.0005                                                     |
| Frmd4b             | FERM domain containing 4B                                                                   | NM_145148        | -0.261                                      | 0.0000                                                     |
| Gabra1             | gamma-aminobutyric acid (GABA-<br>A) receptor, subunit alpha 1                              | NM_010250        | -0.244                                      | 0.0000                                                     |
| Galnt7             | UDP-N-acetyl-alpha-D-<br>galactosamine: polypeptide N-<br>acetylgalactosaminyltransferase 7 | AK041791         | -0.201                                      | 0.0492                                                     |
| Ggta1              | glycoprotein galactosyltransferase<br>alpha 1, 3                                            | XM_915541        | -0.341                                      | 0.0213                                                     |
| Glr1               | glycine receptor, alpha 1 subunit                                                           | NM_020492        | -0.251                                      | 0.0218                                                     |
| Glul               | glutamate-ammonia ligase (glutamine<br>synthase)                                            | XR_003500        | -0.242                                      | 0.0013                                                     |
| Gm498              | NA                                                                                          | XM_917182        | -0.266                                      | 0.0464                                                     |
| Gpr113             | NA                                                                                          | NM_001014394     | -0.350                                      | 0.0484                                                     |
| Gpr155             | G protein-coupled receptor 155                                                              | XM_001002587     | -0.246                                      | 0.0140                                                     |

Table S5. Continued.

Downregulated genes (247):

| Gene Symbol | Gene Name                                                            | Entrez ID    | Fold Change<br><i>MECP2</i> -Tg over<br>WT | FDR-adjusted<br>p-value<br>( <i>MECP2</i> -Tg<br>over WT) |
|-------------|----------------------------------------------------------------------|--------------|--------------------------------------------|-----------------------------------------------------------|
| Gria1       | glutamate receptor, ionotropic,<br>AMPA1 (alpha 1)                   | AK135107     | -0.214                                     | 0.0011                                                    |
| Gtdc1       | glycosyltransferase-like domain<br>containing 1                      | AK028468     | -0.209                                     | 0.0460                                                    |
| Hivep1      | human immunodeficiency virus type I<br>enhancer binding protein 1    | NM_007772    | -0.285                                     | 0.0047                                                    |
| Ibrdc2      | IBR domain containing 2                                              | NM_146042    | -0.246                                     | 0.0056                                                    |
| Igsf4a      | immunoglobulin superfamily,<br>member 4A                             | AB021966     | -0.218                                     | 0.0014                                                    |
| Il12rb1     | interleukin 12 receptor, beta 1                                      | NM_008353    | -0.241                                     | 0.0050                                                    |
| Il6st       | interleukin 6 signal transducer                                      | AK170020     | -0.274                                     | 0.0000                                                    |
| Inadl       | InaD-like ( <i>Drosophila</i> )                                      | NM_172696    | -0.290                                     | 0.0000                                                    |
| Indol1      | NA                                                                   | AK082385     | -0.303                                     | 0.0334                                                    |
| Itga1       | integrin alpha 1                                                     | AK137169     | -0.230                                     | 0.0061                                                    |
| Kcnc2       | potassium voltage gated channel,<br>Shaw-related subfamily, member 2 | NM_001025581 | -0.259                                     | 0.0023                                                    |
| Kcnip3      | NA                                                                   | NM_019789    | -0.273                                     | 0.0455                                                    |
| Kera        | keratocan                                                            | NM_008438    | -0.592                                     | 0.0479                                                    |
| Kif13b      | kinesin family member 13B                                            | XM_001001137 | -0.278                                     | 0.0000                                                    |
| Klhl14      | kelch-like 14 ( <i>Drosophila</i> )                                  | XM_905416    | -0.269                                     | 0.0448                                                    |
| LOC240895   | NA                                                                   | XR_003742    | -0.222                                     | 0.0400                                                    |
| LOC381484   | NA                                                                   | XM_909129    | -0.885                                     | 0.0238                                                    |
| LOC381806   | NA                                                                   | NM_001013775 | -0.906                                     | 0.0287                                                    |
| LOC382469   | NA                                                                   | XR_003768    | -0.348                                     | 0.0399                                                    |
| LOC382471   | NA                                                                   | XR_003850    | -1.015                                     | 0.0170                                                    |
| LOC547223   | NA                                                                   | XM_974408    | -0.754                                     | 0.0265                                                    |
| LOC622459   | NA                                                                   | AK138811     | -0.430                                     | 0.0275                                                    |
| LOC635295   | NA                                                                   | XR_002040    | -0.434                                     | 0.0183                                                    |
| LOC635583   | NA                                                                   | XM_979222    | -0.295                                     | 0.0220                                                    |
| LOC665232   | NA                                                                   | XR_003071    | -0.264                                     | 0.0320                                                    |
| LOC667763   | NA                                                                   | AK040590     | -0.272                                     | 0.0239                                                    |
| LOC670900   | NA                                                                   | XM_356148    | -0.325                                     | 0.0376                                                    |
| LOC671029   | NA                                                                   | BC046394     | -0.282                                     | 0.0475                                                    |
| LOC672056   | NA                                                                   | XR_003685    | -0.835                                     | 0.0234                                                    |
| LOC673340   | NA                                                                   | XR_004199    | -0.344                                     | 0.0255                                                    |
| LOC674183   | NA                                                                   | XM_990669    | -0.253                                     | 0.0485                                                    |
| LOC674649   | NA                                                                   | XR_002534    | -0.407                                     | 0.0320                                                    |

Table S5. Continued.

Downregulated genes (247):

| Gene Symbol | Gene Name                                                                  | Entrez ID | Fold Change<br><i>MECP2</i> -Tg over<br>WT | FDR-adjusted<br>p-value<br>( <i>MECP2</i> -Tg<br>over WT) |
|-------------|----------------------------------------------------------------------------|-----------|--------------------------------------------|-----------------------------------------------------------|
| LOC675182   | NA                                                                         | XM_140042 | -1.378                                     | 0.0036                                                    |
| LOC677555   | NA                                                                         | AB071302  | -0.288                                     | 0.0479                                                    |
| Lrch1       | leucine-rich repeats and calponin<br>homology (CH) domain containing 1     | AK132436  | -0.207                                     | 0.0000                                                    |
| Lrp12       | low density lipoprotein-related<br>protein 12                              | NM_172814 | -0.215                                     | 0.0497                                                    |
| Lrrfip1     | leucine rich repeat (in FLII)<br>interacting protein 1                     | NM_008515 | -0.214                                     | 0.0017                                                    |
| Lrrk2       | leucine-rich repeat kinase 2                                               | NM_025730 | -0.243                                     | 0.0000                                                    |
| Ltbp1       | latent transforming growth factor beta<br>binding protein 1                | NM_206958 | -0.220                                     | 0.0006                                                    |
| Lyl1        | lymphoblastic leukemia                                                     | NM_008535 | -0.207                                     | 0.0328                                                    |
| Magi1       | membrane associated guanylate<br>kinase, WW and PDZ domain<br>containing 1 | AK163800  | -0.228                                     | 0.0000                                                    |
| Magi3       | membrane associated guanylate<br>kinase, WW and PDZ domain<br>containing 3 | NM_133853 | -0.221                                     | 0.0374                                                    |
| Mak         | male germ cell-associated kinase                                           | BC050009  | -0.311                                     | 0.0153                                                    |
| Mansc1      | MANSC domain containing 1                                                  | NM_026345 | -0.465                                     | 0.0026                                                    |
| March1      | membrane-associated ring finger<br>(C3HC4) 1                               | AK086052  | -0.278                                     | 0.0010                                                    |
| Mbnl2       | muscleblind-like 2                                                         | AK220470  | -0.205                                     | 0.0001                                                    |
| Mcf2        | mcf.2 transforming sequence                                                | AK045424  | -0.273                                     | 0.0001                                                    |
| Megf9       | NA                                                                         | AK155926  | -0.242                                     | 0.0391                                                    |
| Miox        | myo-inositol oxygenase                                                     | NM_019977 | -0.331                                     | 0.0426                                                    |
| Mitf        | microphthalmia-associated<br>transcription factor                          | AK052895  | -0.227                                     | 0.0345                                                    |
| Mmachc      | NA                                                                         | NM_025962 | -0.344                                     | 0.0446                                                    |
| Mr1         | major histocompatibility complex,<br>class I-related                       | AF010453  | -0.282                                     | 0.0364                                                    |
| Mtmr7       | myotubularin related protein 7                                             | AK148768  | -0.245                                     | 0.0006                                                    |
| Muc10       | mucin 10, submandibular gland<br>salivary mucin                            | NM_008644 | -0.342                                     | 0.0474                                                    |
| Mybl1       | myeloblastosis oncogene-like 1                                             | NM_008651 | -0.319                                     | 0.0057                                                    |
| Mybphl      | NA                                                                         | NM_026831 | -0.227                                     | 0.0398                                                    |
| Myh6        | myosin, heavy polypeptide 6, cardiac<br>muscle, alpha                      | NM_010856 | -0.229                                     | 0.0029                                                    |
| Mylip       | myosin regulatory light chain<br>interacting protein                       | NM_153789 | -0.243                                     | 0.0327                                                    |

Table S5. Continued.

Downregulated genes (247):

| Gene Symbol | Gene Name                                                                          | Entrez ID    | Fold Change<br><i>MECP2</i> -Tg over<br>WT | FDR-adjusted<br>p-value<br>( <i>MECP2</i> -Tg<br>over WT) |
|-------------|------------------------------------------------------------------------------------|--------------|--------------------------------------------|-----------------------------------------------------------|
| Myo15       | myosin XV                                                                          | AK030528     | -0.220                                     | 0.0001                                                    |
| Myo1e       | myosin IE                                                                          | NM_181072    | -0.206                                     | 0.0077                                                    |
| Napb        | N-ethylmaleimide sensitive fusion<br>protein attachment protein beta               | AK078224     | -0.220                                     | 0.0002                                                    |
| Nek6        | NIMA (never in mitosis gene a)-<br>related expressed kinase 6                      | XM_973147    | -0.256                                     | 0.0048                                                    |
| Oas3        | 2'-5' oligoadenylate synthetase 3                                                  | BC025152     | -0.234                                     | 0.0054                                                    |
| Odf3l1      | NA                                                                                 | NM_198673    | -0.341                                     | 0.0381                                                    |
| Olfrl337    | NA                                                                                 | NM_146309    | -0.799                                     | 0.0362                                                    |
| Olfrl357    | NA                                                                                 | NM_001011737 | -0.428                                     | 0.0049                                                    |
| Olfrl137    | NA                                                                                 | NM_146488    | -0.308                                     | 0.0344                                                    |
| Olfrl735    | NA                                                                                 | NM_001011754 | -0.561                                     | 0.0251                                                    |
| Oxr1        | oxidation resistance 1                                                             | BC098491     | -0.219                                     | 0.0008                                                    |
| Padi1       | peptidyl arginine deiminase, type I                                                | NM_011059    | -0.265                                     | 0.0046                                                    |
| Papss2      | 3'-phosphoadenosine 5'-<br>phosphosulfate synthase 2                               | NM_011864    | -0.407                                     | 0.0128                                                    |
| Parva       | parvin, alpha                                                                      | AK162796     | -0.270                                     | 0.0000                                                    |
| Pex2        | peroxin 2                                                                          | AK044552     | -0.218                                     | 0.0062                                                    |
| Pik3r1      | phosphatidylinositol 3-kinase,<br>regulatory subunit, polypeptide 1<br>(p85 alpha) | NM_001077495 | -0.208                                     | 0.0109                                                    |
| Pip         | prolactin induced protein                                                          | NM_008843    | -0.361                                     | 0.0407                                                    |
| Pip5k2a     | phosphatidylinositol-4-phosphate 5-<br>kinase, type II, alpha                      | NM_008845    | -0.211                                     | 0.0189                                                    |
| Pla2g1b     | phospholipase A2, group IB, pancreas                                               | AK019009     | -0.428                                     | 0.0224                                                    |
| Plch1       | NA                                                                                 | NM_183191    | -0.226                                     | 0.0015                                                    |
| Plekha5     | pleckstrin homology domain<br>containing, family A member 5                        | BC014853     | -0.242                                     | 0.0000                                                    |
| Plekhh2     | pleckstrin homology domain<br>containing, family H (with MyTH4<br>domain) member 2 | NM_177606    | -0.294                                     | 0.0000                                                    |
| Pou2f3      | POU domain, class 2, transcription<br>factor 3                                     | AK153697     | -0.255                                     | 0.0300                                                    |
| Pparg       | peroxisome proliferator activated<br>receptor gamma                                | U01841       | -0.357                                     | 0.0416                                                    |
| Prlr        | prolactin receptor                                                                 | NM_011169    | -0.467                                     | 0.0257                                                    |
| Prtg        | NA                                                                                 | AK045117     | -0.290                                     | 0.0007                                                    |
| Psmc5       | protease (prosome, macropain) 26S<br>subunit, ATPase 5                             | NM_008950    | -0.287                                     | 0.0474                                                    |

Table S5. Continued.

Downregulated genes (247):

| Gene Symbol | Gene Name                                                                                  | Entrez ID    | Fold Change<br><i>MECP2</i> -Tg over<br>WT | FDR-adjusted<br>p-value<br>( <i>MECP2</i> -Tg<br>over WT) |
|-------------|--------------------------------------------------------------------------------------------|--------------|--------------------------------------------|-----------------------------------------------------------|
| Rai14       | retinoic acid induced 14                                                                   | NM_030690    | -0.299                                     | 0.0058                                                    |
| Rapgef4     | Rap guanine nucleotide exchange factor (GEF) 4                                             | NM_019688    | -0.211                                     | 0.0000                                                    |
| Rasgrp3     | RAS, guanyl releasing protein 3                                                            | AK173041     | -0.318                                     | 0.0013                                                    |
| Rbms1       | RNA binding motif, single stranded interacting protein 1                                   | BC057866     | -0.288                                     | 0.0073                                                    |
| Rgs6        | regulator of G-protein signaling 6                                                         | AK053087     | -0.287                                     | 0.0000                                                    |
| Rgs9        | regulator of G-protein signaling 9                                                         | AF011358     | -0.206                                     | 0.0010                                                    |
| Rhbg        | Rhesus blood group-associated B glycoprotein                                               | NM_021375    | -0.243                                     | 0.0221                                                    |
| Ribc2       | RIB43A domain with coiled-coils 2                                                          | XM_001002357 | -0.298                                     | 0.0327                                                    |
| Rsrc1       | arginine/serine-rich coiled-coil 1                                                         | BC027501     | -0.221                                     | 0.0189                                                    |
| Scn1a       | sodium channel, voltage-gated, type I, alpha                                               | XM_899643    | -0.334                                     | 0.0000                                                    |
| Scn4b       | sodium channel, type IV, beta                                                              | NM_001013390 | -0.249                                     | 0.0338                                                    |
| Scn5a       | sodium channel, voltage-gated, type V, alpha                                               | NM_021544    | -0.219                                     | 0.0014                                                    |
| Scn8a       | sodium channel, voltage-gated, type VIII, alpha                                            | NM_001077499 | -0.244                                     | 0.0000                                                    |
| Scpep1      | serine carboxypeptidase 1                                                                  | NM_029023    | -0.305                                     | 0.0006                                                    |
| Setdb2      | NA                                                                                         | XM_001002736 | -0.387                                     | 0.0095                                                    |
| Sgk         | serum/glucocorticoid regulated kinase                                                      | BC070401     | -0.329                                     | 0.0010                                                    |
| Sh3d19      | SH3 domain protein D19                                                                     | D89677       | -0.230                                     | 0.0018                                                    |
| Shoc2       | soc-2 (suppressor of clear) homolog ( <i>C. elegans</i> )                                  | BC026364     | -0.269                                     | 0.0094                                                    |
| Shox2       | short stature homeobox 2                                                                   | AK032007     | -0.364                                     | 0.0376                                                    |
| Slc27a2     | solute carrier family 27 (fatty acid transporter), member 2                                | AK038847     | -0.346                                     | 0.0000                                                    |
| Slc7a9      | solute carrier family 7 (cationic amino acid transporter, y <sup>+</sup> system), member 9 | AF192310     | -0.300                                     | 0.0322                                                    |
| Slc9a3      | solute carrier family 9 (sodium/hydrogen exchanger), member 3                              | AK033564     | -0.235                                     | 0.0363                                                    |
| Smoc1       | SPARC related modular calcium binding 1                                                    | AK040931     | -0.291                                     | 0.0005                                                    |
| Spata21     | NA                                                                                         | XM_991770    | -0.237                                     | 0.0024                                                    |
| Spna1       | spectrin alpha 1                                                                           | NM_011465    | -0.212                                     | 0.0025                                                    |
| Spp1        | secreted phosphoprotein 1                                                                  | AK165965     | -0.459                                     | 0.0082                                                    |

**Table S5.** Continued.

**Downregulated genes (247):**

| <b>Gene Symbol</b> | <b>Gene Name</b>                                                                                              | <b>Entrez ID</b> | <b>Fold Change<br/>MECP2-Tg over<br/>WT</b> | <b>FDR-adjusted<br/>p-value<br/>(MECP2-Tg<br/>over WT)</b> |
|--------------------|---------------------------------------------------------------------------------------------------------------|------------------|---------------------------------------------|------------------------------------------------------------|
| Srgap1             | SLIT-ROBO Rho GTPase activating protein 1                                                                     | AY057898         | -0.228                                      | 0.0008                                                     |
| Srpk2              | serine/arginine-rich protein specific kinase 2                                                                | U92456           | -0.290                                      | 0.0000                                                     |
| St3gal5            | ST3 beta-galactoside alpha-2,3-sialyltransferase 5                                                            | NM_001035228     | -0.259                                      | 0.0014                                                     |
| St6galnac3         | ST6 (alpha-N-acetyl-neuraminyl-2,3-beta-galactosyl-1,3)-N-acetylgalactosaminide alpha-2,6-sialyltransferase 3 | NM_011372        | -0.311                                      | 0.0285                                                     |
| Stard5             | StAR-related lipid transfer (START) domain containing 5                                                       | AK142503         | -0.220                                      | 0.0239                                                     |
| Stat1              | signal transducer and activator of transcription 1                                                            | NM_009283        | -0.218                                      | 0.0081                                                     |
| Stk32b             | serine/threonine kinase 32B                                                                                   | AJ250840         | -0.311                                      | 0.0154                                                     |
| Stxbp3a            | syntaxin binding protein 3A                                                                                   | U19521           | -0.231                                      | 0.0296                                                     |
| Syne1              | synaptic nuclear envelope 1                                                                                   | AK122550         | -0.227                                      | 0.0000                                                     |
| Tbc1d4             | TBC1 domain family, member 4                                                                                  | XM_919052        | -0.275                                      | 0.0003                                                     |
| Tcf7l2             | transcription factor 7-like 2, T-cell specific, HMG-box                                                       | AF363724         | -0.268                                      | 0.0013                                                     |
| Tfrc               | transferrin receptor                                                                                          | BC067403         | -0.308                                      | 0.0030                                                     |
| Tgfbr2             | transforming growth factor, beta receptor II                                                                  | NM_009371        | -0.215                                      | 0.0413                                                     |
| Tjp1               | tight junction protein 1                                                                                      | AK161324         | -0.225                                      | 0.0001                                                     |
| Tmem132d           | NA                                                                                                            | NM_172885        | -0.240                                      | 0.0092                                                     |
| Tmem2              | transmembrane protein 2                                                                                       | AK156343         | -0.205                                      | 0.0045                                                     |
| Tmod1              | tropomodulin 1                                                                                                | AK132878         | -0.390                                      | 0.0002                                                     |
| Tnfsf13b           | tumor necrosis factor (ligand) superfamily, member 13b                                                        | AK034121         | -0.359                                      | 0.0188                                                     |
| Top1mt             | DNA topoisomerase 1, mitochondrial                                                                            | XM_994430        | -0.267                                      | 0.0044                                                     |
| Tph2               | tryptophan hydroxylase 2                                                                                      | NM_173391        | -0.295                                      | 0.0259                                                     |
| Trp53bp2           | transformation related protein 53 binding protein 2                                                           | NM_173378        | -0.217                                      | 0.0053                                                     |
| Trpm3              | transient receptor potential cation channel, subfamily M, member 3                                            | AK046308         | -0.244                                      | 0.0000                                                     |
| Ttf2               | transcription termination factor, RNA polymerase II                                                           | NM_001013026     | -0.235                                      | 0.0175                                                     |
| Ttll5              | tubulin tyrosine ligase like family 5                                                                         | XM_994418        | -0.253                                      | 0.0000                                                     |
| Ubd                | ubiquitin D                                                                                                   | NM_023137        | -0.831                                      | 0.0463                                                     |
| Usp25              | ubiquitin specific peptidase 25                                                                               | NM_013918        | -0.232                                      | 0.0012                                                     |

Table S5. Continued.

Downregulated genes (247):

| <b>Gene Symbol</b> | <b>Gene Name</b>           | <b>Entrez ID</b> | <b>Fold Change<br/><i>MECP2</i>-Tg over<br/>WT</b> | <b>FDR-adjusted<br/>p-value<br/>(<i>MECP2</i>-Tg<br/>over WT)</b> |
|--------------------|----------------------------|------------------|----------------------------------------------------|-------------------------------------------------------------------|
| Utrn               | utrophin                   | AK134424         | -0.225                                             | 0.0000                                                            |
| Vil2               | villin 2                   | NM_009510        | -0.263                                             | 0.0008                                                            |
| Xdh                | xanthine dehydrogenase     | AK164764         | -0.250                                             | 0.0063                                                            |
| Zmat4              | zinc finger, matrin type 4 | AK043510         | -0.258                                             | 0.0089                                                            |



**Table S6.** The list of genes specifically misregulated in *Mecp2*-null hypothalami (FDR-adjusted p-value < 0.05).

**Upregulated genes (85):**

| <b>Gene Symbol</b> | <b>Gene Name</b>                                            | <b>Entrez ID</b> | <b>Fold Change<br/><i>Mecp2</i>-null over<br/>WT</b> | <b>FDR-adjusted<br/>p-value<br/>(<i>Mecp2</i>-null over<br/>WT)</b> |
|--------------------|-------------------------------------------------------------|------------------|------------------------------------------------------|---------------------------------------------------------------------|
| 1700081B01Rik      | NA                                                          | AK006961         | 0.407                                                | 0.0362                                                              |
| 1700112M02Rik      | NA                                                          | AK007185         | 0.581                                                | 0.0239                                                              |
| 4732456N10Rik      | NA                                                          | NM_053249        | 0.246                                                | 0.0375                                                              |
| 4930401O12Rik      | NA                                                          | AK015040         | 0.607                                                | 0.0409                                                              |
| 9930013L23Rik      | RIKEN cDNA 9930013L23 gene                                  | BC056981         | 0.307                                                | 0.0000                                                              |
| 9930021J17Rik      | RIKEN cDNA 9930021J17 gene                                  | BC094511         | 0.302                                                | 0.0227                                                              |
| Adcy1              | adenylate cyclase 1                                         | BC050125         | 0.273                                                | 0.0000                                                              |
| Angpt2             | angiopoietin 2                                              | NM_007426        | 0.280                                                | 0.0125                                                              |
| Bace2              | beta-site APP-cleaving enzyme 2                             | NM_019517        | 0.318                                                | 0.0073                                                              |
| BC016201           | cDNA sequence BC016201                                      | BC051415         | 0.245                                                | 0.0122                                                              |
| BC048507           | cDNA sequence BC048507                                      | XM_621326        | 0.261                                                | 0.0407                                                              |
| Bhlhb2             | basic helix-loop-helix domain<br>containing, class B2       | NM_011498        | 0.287                                                | 0.0016                                                              |
| Bpil1              | bactericidal/permeability-<br>increasing protein-like 1     | AK009346         | 0.242                                                | 0.0373                                                              |
| Btbd14a            | BTB (POZ) domain containing<br>14A                          | AK043047         | 0.241                                                | 0.0004                                                              |
| C1ql3              | C1q-like 3                                                  | NM_153155        | 0.352                                                | 0.0239                                                              |
| Calcr              | calcitonin receptor                                         | NM_007588        | 0.238                                                | 0.0057                                                              |
| Camk2a             | calcium/calmodulin-dependent<br>protein kinase II alpha     | NM_177407        | 0.212                                                | 0.0109                                                              |
| Cdh16              | cadherin 16                                                 | AK164546         | 0.249                                                | 0.0421                                                              |
| Cdh4               | cadherin 4                                                  | NM_009867        | 0.306                                                | 0.0000                                                              |
| Chrm3              | cholinergic receptor, muscarinic 3,<br>cardiac              | NM_033269        | 0.348                                                | 0.0003                                                              |
| Chst11             | carbohydrate sulfotransferase 11                            | NM_021439        | 0.329                                                | 0.0001                                                              |
| Col25a1            | procollagen, type XXV, alpha 1                              | NM_198711        | 0.201                                                | 0.0000                                                              |
| Col4a1             | procollagen, type IV, alpha 1                               | NM_009931        | 0.217                                                | 0.0000                                                              |
| Cpne4              | copine IV                                                   | NM_028719        | 0.249                                                | 0.0000                                                              |
| Crispld2           | cysteine-rich secretory protein<br>LCCL domain containing 2 | NM_030209        | 0.259                                                | 0.0054                                                              |
| Csmd1              | CUB and Sushi multiple domains1                             | XM_979853        | 0.289                                                | 0.0000                                                              |
| Cyp26b1            | cytochrome P450, family 26,<br>subfamily b, polypeptide 1   | BC059246         | 0.390                                                | 0.0222                                                              |
| D230005D02Rik      | RIKEN cDNA D230005D02 gene                                  | AK082388         | 0.220                                                | 0.0000                                                              |
| D630021H01Rik      | NA                                                          | AK052676         | 0.920                                                | 0.0023                                                              |
| D930015E06Rik      | RIKEN cDNA D930015E06 gene                                  | AK028803         | 0.222                                                | 0.0000                                                              |
| E130310K16Rik      | RIKEN cDNA E130310K16 gene                                  | AK141456         | 0.291                                                | 0.0489                                                              |
| Efna5              | ephrin A5                                                   | NM_207654        | 0.334                                                | 0.0013                                                              |
| EG433623           | NA                                                          | XR_004819        | 0.200                                                | 0.0090                                                              |

Table S6. Continued.

Upregulated genes (85):

| Gene Symbol | Gene Name                                                                      | Entrez ID    | Fold Change<br><i>Mecp2</i> -null over<br>WT | FDR-adjusted<br>p-value<br>( <i>Mecp2</i> -null over<br>WT) |
|-------------|--------------------------------------------------------------------------------|--------------|----------------------------------------------|-------------------------------------------------------------|
| G6pc2       | glucose-6-phosphatase, catalytic, 2                                            | NM_021331    | 0.403                                        | 0.0444                                                      |
| Gpr44       | G protein-coupled receptor 44                                                  | NM_009962    | 0.310                                        | 0.0425                                                      |
| Habp2       | hyaluronic acid binding protein 2                                              | NM_146101    | 0.342                                        | 0.0044                                                      |
| Hba-a1      | hemoglobin alpha, adult chain 1                                                | AK011056     | 0.483                                        | 0.0402                                                      |
| Homer2      | homer homolog 2 (Drosophila)                                                   | BC038314     | 0.221                                        | 0.0257                                                      |
| Hoxc13      | homeo box C13                                                                  | NM_010464    | 0.224                                        | 0.0100                                                      |
| Hpn         | hepsin                                                                         | NM_008281    | 0.203                                        | 0.0187                                                      |
| Il1f6       | interleukin 1 family, member 6                                                 | NM_019450    | 0.377                                        | 0.0500                                                      |
| Irak1       | interleukin-1 receptor-associated<br>kinase 1                                  | NM_008363    | 0.557                                        | 0.0000                                                      |
| Isl1        | ISL1 transcription factor,<br>LIM/homeodomain (islet 1)                        | NM_021459    | 0.237                                        | 0.0246                                                      |
| Kcnab1      | potassium voltage-gated channel,<br>shaker-related subfamily, beta<br>member 1 | AK082310     | 0.284                                        | 0.0000                                                      |
| Kcnk9       | NA                                                                             | NM_001033876 | 0.414                                        | 0.0299                                                      |
| Kif24       | kinesin family member 24                                                       | NM_024241    | 0.273                                        | 0.0439                                                      |
| Klre1       | killer cell lectin-like receptor<br>family E member 1                          | NM_153590    | 0.338                                        | 0.0111                                                      |
| Ksr1        | NA                                                                             | NM_013571    | 0.250                                        | 0.0000                                                      |
| LOC622552   | NA                                                                             | AK038993     | 0.513                                        | 0.0183                                                      |
| LOC632784   | NA                                                                             | XM_907012    | 0.328                                        | 0.0340                                                      |
| LOC633879   | NA                                                                             | NM_001033251 | 0.744                                        | 0.0190                                                      |
| LOC636466   | NA                                                                             | XM_994280    | 0.244                                        | 0.0099                                                      |
| LOC669490   | NA                                                                             | NM_011856    | 0.216                                        | 0.0000                                                      |
| LOC670210   | NA                                                                             | NM_053171    | 0.369                                        | 0.0023                                                      |
| Loxl2       | lysyl oxidase-like 2                                                           | NM_033325    | 0.319                                        | 0.0024                                                      |
| Lsp1        | lymphocyte specific 1                                                          | AK075783     | 0.217                                        | 0.0250                                                      |
| Lypd1       | Ly6/Plaur domain containing 1                                                  | BC058599     | 0.293                                        | 0.0057                                                      |
| Mgl1        | monoglyceride lipase                                                           | NM_011844    | 0.273                                        | 0.0000                                                      |
| Mical2      | NA                                                                             | AK220353     | 0.254                                        | 0.0001                                                      |
| Mkl1        | MKL (megakaryoblastic<br>leukemia)/myocardin-like 1                            | AK155937     | 0.207                                        | 0.0043                                                      |
| Nr1d1       | nuclear receptor subfamily 1,<br>group D, member 1                             | NM_145434    | 0.236                                        | 0.0000                                                      |
| Nrn1        | neuritin 1                                                                     | NM_153529    | 0.281                                        | 0.0005                                                      |
| Nrp2        | neuropilin 2                                                                   | NM_010939    | 0.203                                        | 0.0000                                                      |
| Odz2        | odd Oz/ten-m homolog 2<br>(Drosophila)                                         | AK031198     | 0.244                                        | 0.0000                                                      |
| Olf1340     | NA                                                                             | NM_146304    | 0.218                                        | 0.0375                                                      |

**Table S6.** Continued.

**Upregulated genes (85):**

| <b>Gene Symbol</b> | <b>Gene Name</b>                                                              | <b>Entrez ID</b> | <b>Fold Change<br/><i>Mecp2</i>-null over<br/>WT</b> | <b>FDR-adjusted<br/>p-value<br/>(<i>Mecp2</i>-null over<br/>WT)</b> |
|--------------------|-------------------------------------------------------------------------------|------------------|------------------------------------------------------|---------------------------------------------------------------------|
| Olfir820           | NA                                                                            | NM_146675        | 0.637                                                | 0.0448                                                              |
| Pcbp3              | poly(rC) binding protein 3                                                    | NM_021568        | 0.220                                                | 0.0006                                                              |
| Pgm5               | NA                                                                            | AK076484         | 0.269                                                | 0.0037                                                              |
| Plxna4             | plexin A4                                                                     | XM_984204        | 0.208                                                | 0.0000                                                              |
| Prkcq              | protein kinase C, theta                                                       | AK085546         | 0.231                                                | 0.0000                                                              |
| Ptk2b              | PTK2 protein tyrosine kinase 2<br>beta                                        | BC024594         | 0.234                                                | 0.0347                                                              |
| Rassf8             | Ras association (RalGDS/AF-6)<br>domain family 8                              | AK142231         | 0.218                                                | 0.0205                                                              |
| Rorb               | RAR-related orphan receptor beta                                              | BC024768         | 0.225                                                | 0.0000                                                              |
| Sec14l1            | SEC14-like 1 ( <i>S. cerevisiae</i> )                                         | AK047396         | 0.250                                                | 0.0000                                                              |
| Sh2d6              | NA                                                                            | XM_911211        | 0.201                                                | 0.0308                                                              |
| Slc24a4            | solute carrier family 24<br>(sodium/potassium/calcium<br>exchanger), member 4 | AK079049         | 0.216                                                | 0.0082                                                              |
| Sorcs3             | sortilin-related VPS10 domain<br>containing receptor 3                        | NM_025696        | 0.254                                                | 0.0000                                                              |
| Tex101             | testis expressed gene 101                                                     | DQ222040         | 0.359                                                | 0.0429                                                              |
| Tnfrsf19l          | tumor necrosis factor receptor<br>superfamily, member 19-like                 | NM_177073        | 0.212                                                | 0.0018                                                              |
| Tspan9             | tetraspanin 9                                                                 | NM_175414        | 0.334                                                | 0.0000                                                              |
| Umodl1             | NA                                                                            | NM_177465        | 0.255                                                | 0.0021                                                              |
| Usp3               | ubiquitin specific peptidase 3                                                | AK158516         | 0.216                                                | 0.0004                                                              |
| Ust                | uronyl-2-sulfotransferase                                                     | NM_177387        | 0.279                                                | 0.0002                                                              |
| Zbtb16             | zinc finger and BTB domain<br>containing 16                                   | NM_001033324     | 0.467                                                | 0.0003                                                              |
| Zfp496             | zinc finger protein 496                                                       | NM_172941        | 0.218                                                | 0.0064                                                              |

**Downregulated genes (284):**

| <b>Gene Symbol</b> | <b>Gene Name</b>           | <b>Entrez ID</b> | <b>Fold Change<br/><i>Mecp2</i>-null over<br/>WT</b> | <b>FDR-adjusted p-<br/>value (<i>Mecp2</i>-null<br/>over WT)</b> |
|--------------------|----------------------------|------------------|------------------------------------------------------|------------------------------------------------------------------|
| 1110049B09Rik      | RIKEN cDNA 1110049B09 gene | XM_976214        | -0.224                                               | 0.0113                                                           |
| 1110057K04Rik      | RIKEN cDNA 1110057K04 gene | AK162914         | -0.211                                               | 0.0337                                                           |
| 1200016E24Rik      | RIKEN cDNA 1200016E24 gene | AK075710         | -0.286                                               | 0.0288                                                           |
| 1700024D23Rik      | RIKEN cDNA 1700024D23 gene | NM_029911        | -0.323                                               | 0.0066                                                           |
| 1700027A23Rik      | RIKEN cDNA 1700027A23 gene | AK006407         | -0.298                                               | 0.0472                                                           |
| 1810048J11Rik      | RIKEN cDNA 1810048J11 gene | AK076035         | -0.252                                               | 0.0000                                                           |
| 2310005N01Rik      | RIKEN cDNA 2310005N01 gene | BC108404         | -0.202                                               | 0.0158                                                           |

Table S6. Continued.

Downregulated genes (284):

| Gene Symbol   | Gene Name                                                              | Entrez ID    | Fold Change<br><i>Mecp2</i> -null over<br>WT | FDR-adjusted<br>p-value<br>( <i>Mecp2</i> -null over<br>WT) |
|---------------|------------------------------------------------------------------------|--------------|----------------------------------------------|-------------------------------------------------------------|
| 2310057J16Rik | RIKEN cDNA 2310057J16 gene                                             | BC048787     | -0.213                                       | 0.0000                                                      |
| 2410187C16Rik | RIKEN cDNA 2410187C16 gene                                             | AK010831     | -0.240                                       | 0.0235                                                      |
| 2610110G12Rik | RIKEN cDNA 2610110G12 gene                                             | AK028297     | -0.246                                       | 0.0015                                                      |
| 2700012I20Rik | RIKEN cDNA 2700012I20 gene                                             | AK012238     | -0.453                                       | 0.0460                                                      |
| 2700085E05Rik | RIKEN cDNA 2700085E05 gene                                             | BC055356     | -0.218                                       | 0.0018                                                      |
| 3830406C13Rik | RIKEN cDNA 3830406C13 gene                                             | NM_146051    | -0.258                                       | 0.0091                                                      |
| 4921504I05Rik | RIKEN cDNA 4921504I05 gene                                             | BC061080     | -0.687                                       | 0.0432                                                      |
| 4930455F23Rik | RIKEN cDNA 4930455F23 gene                                             | XM_001002779 | -0.202                                       | 0.0080                                                      |
| 4930480G23Rik | RIKEN cDNA 4930480G23 gene                                             | AK015599     | -0.490                                       | 0.0192                                                      |
| 4930528D03Rik | RIKEN cDNA 4930528D03 gene                                             | AK015923     | -0.480                                       | 0.0451                                                      |
| 4932432K03Rik | RIKEN cDNA 4932432K03 gene                                             | AK053266     | -0.203                                       | 0.0374                                                      |
| 4933426K21Rik | RIKEN cDNA 4933426K21 gene                                             | XM_132812    | -0.330                                       | 0.0078                                                      |
| 5730591J02Rik | RIKEN cDNA 5730591J02 gene                                             | AK054421     | -0.211                                       | 0.0407                                                      |
| 6330503K22Rik | RIKEN cDNA 6330503K22 gene                                             | NM_182995    | -0.217                                       | 0.0004                                                      |
| 6430524H05Rik | NA                                                                     | NM_001033531 | -0.244                                       | 0.0011                                                      |
| 9030617O03Rik | RIKEN cDNA 9030617O03 gene                                             | BC021385     | -0.250                                       | 0.0064                                                      |
| 9430022A06Rik | NA                                                                     | AK158576     | -0.534                                       | 0.0102                                                      |
| 9430087C24Rik | NA                                                                     | AK035088     | -0.389                                       | 0.0309                                                      |
| A330021E22Rik | RIKEN cDNA A330021E22 gene                                             | AK164190     | -0.220                                       | 0.0004                                                      |
| A430106J12Rik | RIKEN cDNA A430106J12 gene                                             | AK040472     | -0.224                                       | 0.0000                                                      |
| A430107O13Rik | RIKEN cDNA A430107O13 gene                                             | XM_485730    | -0.216                                       | 0.0221                                                      |
| A430108E01Rik | RIKEN cDNA A430108E01 gene                                             | AK031601     | -0.224                                       | 0.0159                                                      |
| A830018L16Rik | RIKEN cDNA A830018L16 gene                                             | AK135047     | -0.280                                       | 0.0017                                                      |
| Abcd3         | ATP-binding cassette, sub-family<br>D (ALD), member 3                  | NM_008991    | -0.208                                       | 0.0000                                                      |
| Acly          | ATP citrate lyase                                                      | AK162364     | -0.206                                       | 0.0000                                                      |
| Acsl5         | acyl-CoA synthetase long-chain<br>family member 5                      | NM_027976    | -0.297                                       | 0.0000                                                      |
| Agtr2         | angiotensin II receptor, type 2                                        | NM_007429    | -0.493                                       | 0.0461                                                      |
| AI427515      | expressed sequence AI427515                                            | AK035009     | -0.266                                       | 0.0000                                                      |
| Aldh1l2       | aldehyde dehydrogenase 1 family,<br>member L2                          | NM_153543    | -0.331                                       | 0.0000                                                      |
| Alox8         | NA                                                                     | NM_009661    | -0.408                                       | 0.0000                                                      |
| Ankra2        | ankyrin repeat, family A<br>(RFXANK-like), 2                           | BC066113     | -0.202                                       | 0.0229                                                      |
| Ankrd55       | NA                                                                     | AK081197     | -0.336                                       | 0.0000                                                      |
| Anln          | anillin, actin binding protein<br>(scraps homolog, <i>Drosophila</i> ) | AK046102     | -0.221                                       | 0.0074                                                      |
| Apex1         | apurinic/apurimidinic<br>endonuclease 1                                | NM_009687    | -0.216                                       | 0.0122                                                      |

Table S6. Continued.

Downregulated genes (284):

| Gene Symbol   | Gene Name                                                                                       | Entrez ID    | Fold Change<br><i>Mecp2</i> -null over<br>WT | FDR-adjusted<br>p-value<br>( <i>Mecp2</i> -null over<br>WT) |
|---------------|-------------------------------------------------------------------------------------------------|--------------|----------------------------------------------|-------------------------------------------------------------|
| Aqp4          | aquaporin 4                                                                                     | AK039777     | -0.200                                       | 0.0043                                                      |
| Arhgap1       | Rho GTPase activating protein 1                                                                 | BC006592     | -0.222                                       | 0.0025                                                      |
| Arrdc2        | arrestin domain containing 2                                                                    | NM_027560    | -0.209                                       | 0.0041                                                      |
| Arsg          | NA                                                                                              | NM_028710    | -0.228                                       | 0.0003                                                      |
| Arsk          | NA                                                                                              | AK033968     | -0.220                                       | 0.0413                                                      |
| Ash2l         | ash2 (absent, small, or homeotic)-<br>like ( <i>Drosophila</i> )                                | AK146254     | -0.228                                       | 0.0000                                                      |
| Asl           | argininosuccinate lyase                                                                         | NM_133768    | -0.208                                       | 0.0007                                                      |
| Aspa          | aspartoacylase (aminoacylase) 2                                                                 | NM_023113    | -0.285                                       | 0.0281                                                      |
| Atp7a         | ATPase, Cu <sup>++</sup> transporting, alpha<br>polypeptide                                     | NM_009726    | -0.201                                       | 0.0065                                                      |
| Atxn3         | NA                                                                                              | NM_029705    | -0.206                                       | 0.0064                                                      |
| B830045N13Rik | RIKEN cDNA B830045N13 gene                                                                      | AK083233     | -0.276                                       | 0.0001                                                      |
| Bbox1         | butyrobetaine (gamma), 2-<br>oxoglutarate dioxygenase 1<br>(gamma-butyrobetaine<br>hydroxylase) | NM_130452    | -0.278                                       | 0.0118                                                      |
| BC022224      | cDNA sequence BC022224                                                                          | XM_001002312 | -0.228                                       | 0.0316                                                      |
| BC052040      | cDNA sequence BC052040                                                                          | BC052040     | -0.273                                       | 0.0049                                                      |
| BC056474      | cDNA sequence BC056474                                                                          | AK147129     | -0.231                                       | 0.0336                                                      |
| BC068110      | NA                                                                                              | NM_001013778 | -0.268                                       | 0.0012                                                      |
| BC068171      | cDNA sequence BC068171                                                                          | XM_903797    | -0.226                                       | 0.0201                                                      |
| Blmh          | bleomycin hydrolase                                                                             | NM_178645    | -0.230                                       | 0.0000                                                      |
| Brwd3         | bromodomain and WD repeat<br>domain containing 3                                                | XM_897923    | -0.231                                       | 0.0000                                                      |
| Bud13         | NA                                                                                              | NM_146000    | -0.221                                       | 0.0122                                                      |
| Bzw1          | basic leucine zipper and W2<br>domains 1                                                        | XR_002994    | -0.304                                       | 0.0042                                                      |
| C130022K22Rik | RIKEN cDNA C130022K22 gene                                                                      | NM_172730    | -0.271                                       | 0.0374                                                      |
| C130090K23Rik | RIKEN cDNA C130090K23 gene                                                                      | NM_145560    | -0.238                                       | 0.0244                                                      |
| Camk1g        | calcium/calmodulin-dependent<br>protein kinase I gamma                                          | NM_144817    | -0.228                                       | 0.0003                                                      |
| Ccdc104       | NA                                                                                              | NM_025740    | -0.273                                       | 0.0000                                                      |
| Cckbr         | cholecystokinin B receptor                                                                      | AK039721     | -0.242                                       | 0.0017                                                      |
| Ccnc          | cyclin C                                                                                        | BC062376     | -0.245                                       | 0.0086                                                      |
| Cd59a         | CD59a antigen                                                                                   | NM_007652    | -0.469                                       | 0.0013                                                      |
| Cdh10         | cadherin 10                                                                                     | AK048368     | -0.234                                       | 0.0010                                                      |
| Cdh20         | cadherin 20                                                                                     | NM_011800    | -0.212                                       | 0.0021                                                      |
| Cetn4         | centrin 4                                                                                       | BC087905     | -0.453                                       | 0.0017                                                      |
| Clgn          | calmegin                                                                                        | NM_009904    | -0.469                                       | 0.0000                                                      |

**Table S6.** Continued.

**Downregulated genes (284):**

| <b>Gene Symbol</b> | <b>Gene Name</b>                                               | <b>Entrez ID</b> | <b>Fold Change<br/><i>Mecp2</i>-null over<br/>WT</b> | <b>FDR-adjusted<br/>p-value<br/>(<i>Mecp2</i>-null over<br/>WT)</b> |
|--------------------|----------------------------------------------------------------|------------------|------------------------------------------------------|---------------------------------------------------------------------|
| Cntn6              | contactin 6                                                    | NM_017383        | -0.256                                               | 0.0000                                                              |
| Crabp1             | cellular retinoic acid binding<br>protein I                    | BC065787         | -0.311                                               | 0.0189                                                              |
| Crnk1l             | Crn, crooked neck-like 1<br>(Drosophila)                       | NM_025820        | -0.243                                               | 0.0112                                                              |
| Ctns               | cystinosis, nephropathic                                       | NM_031251        | -0.251                                               | 0.0001                                                              |
| D14Abbl1e          | DNA segment, Chr 14, Abbott 1<br>expressed                     | XM_897712        | -0.216                                               | 0.0308                                                              |
| D530005L17Rik      | NA                                                             | BC027370         | -0.207                                               | 0.0104                                                              |
| Dhx57              | DEAH (Asp-Glu-Ala-Asp/His)<br>box polypeptide 57               | BC079618         | -0.200                                               | 0.0000                                                              |
| Dimt1              | NA                                                             | NM_025447        | -0.322                                               | 0.0015                                                              |
| Dlec1              | NA                                                             | AK045848         | -0.234                                               | 0.0041                                                              |
| Drg1               | developmentally regulated GTP<br>binding protein 1             | AK090156         | -0.204                                               | 0.0073                                                              |
| Dsc2               | desmocollin 2                                                  | AK172168         | -0.295                                               | 0.0081                                                              |
| Dync2li1           | NA                                                             | XM_984615        | -0.284                                               | 0.0008                                                              |
| Dysf               | dysferlin                                                      | AJ242954         | -0.207                                               | 0.0001                                                              |
| E030013G06Rik      | RIKEN cDNA E030013G06 gene                                     | NM_177697        | -0.229                                               | 0.0001                                                              |
| E130008D07Rik      | NA                                                             | AK053296         | -0.364                                               | 0.0393                                                              |
| E130119H09Rik      | RIKEN cDNA E130119H09 gene                                     | XR_004505        | -0.279                                               | 0.0406                                                              |
| Eea1               | early endosome antigen 1                                       | BC021363         | -0.201                                               | 0.0000                                                              |
| Efcbp1             | EF hand calcium binding protein 1                              | AK005641         | -0.227                                               | 0.0004                                                              |
| EG627232           | NA                                                             | XM_891890        | -0.217                                               | 0.0295                                                              |
| EG635680           | NA                                                             | AK049064         | -0.221                                               | 0.0238                                                              |
| Ell2               | elongation factor RNA polymerase<br>II 2                       | AK033541         | -0.253                                               | 0.0186                                                              |
| Eltd1              | EGF, latrophilin seven<br>transmembrane domain containing<br>1 | NM_133222        | -0.244                                               | 0.0021                                                              |
| Endod1             | NA                                                             | NM_028013        | -0.267                                               | 0.0073                                                              |
| Entpd5             | ectonucleoside triphosphate<br>diphosphohydrolase 5            | NM_007647        | -0.254                                               | 0.0000                                                              |
| Etf1               | eukaryotic translation termination<br>factor 1                 | AK038771         | -0.215                                               | 0.0157                                                              |
| Exoc3              | NA                                                             | NM_177333        | -0.201                                               | 0.0006                                                              |
| Fancc              | Fanconi anemia, complementation<br>group C                     | L08266           | -0.319                                               | 0.0034                                                              |
| Fastkd1            | NA                                                             | NM_177244        | -0.326                                               | 0.0000                                                              |
| Fbxo25             | F-box only protein 25                                          | NM_025785        | -0.209                                               | 0.0025                                                              |

**Table S6.** Continued.

**Downregulated genes (284):**

| <b>Gene Symbol</b> | <b>Gene Name</b>                                                                   | <b>Entrez ID</b> | <b>Fold Change<br/><i>Mecp2</i>-null over<br/>WT</b> | <b>FDR-adjusted<br/>p-value<br/>(<i>Mecp2</i>-null over<br/>WT)</b> |
|--------------------|------------------------------------------------------------------------------------|------------------|------------------------------------------------------|---------------------------------------------------------------------|
| Fgd4               | FYVE, RhoGEF and PH domain containing 4                                            | AK043656         | -0.201                                               | 0.0000                                                              |
| Fkbp3              | FK506 binding protein 3                                                            | NM_013902        | -0.245                                               | 0.0097                                                              |
| Fstl5              | follistatin-like 5                                                                 | NM_178673        | -0.259                                               | 0.0105                                                              |
| G6pd2              | glucose-6-phosphate dehydrogenase 2                                                | NM_008062        | -0.200                                               | 0.0315                                                              |
| Gab3               | growth factor receptor bound protein 2-associated protein 3                        | XM_903329        | -0.440                                               | 0.0001                                                              |
| Galns              | galactosamine (N-acetyl)-6-sulfate sulfatase                                       | NM_016722        | -0.227                                               | 0.0006                                                              |
| Galnt6             | UDP-N-acetyl-alpha-D-galactosamine:polypeptide N-acetylgalactosaminyltransferase 6 | XM_001000202     | -0.204                                               | 0.0090                                                              |
| Garnl3             | GTPase activating RANGAP domain-like 3                                             | AK133163         | -0.247                                               | 0.0000                                                              |
| Gbp6               | NA                                                                                 | AK152380         | -0.243                                               | 0.0449                                                              |
| Gcc2               | NA                                                                                 | AK008992         | -0.221                                               | 0.0000                                                              |
| Glrb               | glycine receptor, beta subunit                                                     | NM_010298        | -0.235                                               | 0.0469                                                              |
| Gmps               | guanine monphosphate synthetase                                                    | NM_001033300     | -0.235                                               | 0.0017                                                              |
| Gnail              | guanine nucleotide binding protein, alpha inhibiting 1                             | NM_010305        | -0.284                                               | 0.0000                                                              |
| Gpr116             | G protein-coupled receptor 116                                                     | XM_001003162     | -0.293                                               | 0.0000                                                              |
| Gramd2             | NA                                                                                 | NM_001033498     | -0.226                                               | 0.0271                                                              |
| Grb10              | growth factor receptor bound protein 10                                            | AK169000         | -0.212                                               | 0.0000                                                              |
| Grm3               | glutamate receptor, metabotropic 3                                                 | NM_181850        | -0.261                                               | 0.0007                                                              |
| Gtf2h2             | general transcription factor II H, polypeptide 2                                   | BC016231         | -0.236                                               | 0.0007                                                              |
| Gtpbp8             | NA                                                                                 | AK078242         | -0.236                                               | 0.0015                                                              |
| Guk1               | guanylate kinase 1                                                                 | NM_008193        | -0.207                                               | 0.0022                                                              |
| Heew1              | HECT, C2 and WW domain containing E3 ubiquitin protein ligase 1                    | AK029861         | -0.224                                               | 0.0000                                                              |
| Hint3              | histidine triad nucleotide binding protein 3                                       | NM_025798        | -0.284                                               | 0.0409                                                              |
| Hisppd1            | NA                                                                                 | AK051955         | -0.272                                               | 0.0000                                                              |
| Hmgb2l1            | high mobility group box 2-like 1                                                   | AK014640         | -0.204                                               | 0.0021                                                              |
| Hps3               | Hermansky-Pudlak syndrome 3 homolog (human)                                        | NM_080634        | -0.218                                               | 0.0000                                                              |
| Hsp90aa1           | NA                                                                                 | AK158753         | -0.218                                               | 0.0001                                                              |
| Ide                | insulin degrading enzyme                                                           | AK029089         | -0.250                                               | 0.0020                                                              |

**Table S6.** Continued.

**Downregulated genes (284):**

| <b>Gene Symbol</b> | <b>Gene Name</b>                                                       | <b>Entrez ID</b> | <b>Fold Change<br/><i>Mecp2</i>-null over<br/>WT</b> | <b>FDR-adjusted<br/>p-value<br/>(<i>Mecp2</i>-null over<br/>WT)</b> |
|--------------------|------------------------------------------------------------------------|------------------|------------------------------------------------------|---------------------------------------------------------------------|
| Ift81              | NA                                                                     | NM_009879        | -0.227                                               | 0.0011                                                              |
| Ighv1-77           | NA                                                                     | XM_894825        | -0.433                                               | 0.0441                                                              |
| Il10rb             | interleukin 10 receptor, beta                                          | AK040938         | -0.246                                               | 0.0246                                                              |
| Il33               | NA                                                                     | AK020353         | -0.323                                               | 0.0001                                                              |
| Impg2              | NA                                                                     | NM_174876        | -0.215                                               | 0.0407                                                              |
| Intu               | NA                                                                     | NM_178386        | -0.221                                               | 0.0317                                                              |
| Itga4              | integrin alpha 4                                                       | AK037794         | -0.234                                               | 0.0003                                                              |
| Kcnq4              | potassium voltage-gated channel,<br>subfamily Q, member 4              | XM_978045        | -0.281                                               | 0.0034                                                              |
| Kif9               | kinesin family member 9                                                | AK029776         | -0.216                                               | 0.0290                                                              |
| Lgi1               | leucine-rich repeat LGI family,<br>member 1                            | NM_020278        | -0.208                                               | 0.0052                                                              |
| LOC385336          | NA                                                                     | XM_001002232     | -0.675                                               | 0.0201                                                              |
| LOC620376          | NA                                                                     | AK045385         | -0.277                                               | 0.0436                                                              |
| LOC620499          | NA                                                                     | XM_974591        | -0.241                                               | 0.0496                                                              |
| LOC623241          | NA                                                                     | XR_003922        | -0.336                                               | 0.0308                                                              |
| LOC670389          | NA                                                                     | XM_916746        | -0.284                                               | 0.0399                                                              |
| LOC671429          | NA                                                                     | NM_009086        | -0.247                                               | 0.0073                                                              |
| LOC671598          | NA                                                                     | AK088688         | -0.291                                               | 0.0365                                                              |
| LOC671909          | NA                                                                     | XM_902375        | -0.217                                               | 0.0047                                                              |
| LOC675766          | NA                                                                     | XM_994803        | -0.229                                               | 0.0117                                                              |
| LOC675977          | NA                                                                     | XM_983830        | -0.499                                               | 0.0299                                                              |
| Lrfr3              | leucine rich repeat and fibronectin<br>type III domain containing 3    | NM_175478        | -0.202                                               | 0.0278                                                              |
| Lrrc9              | NA                                                                     | AK031279         | -0.248                                               | 0.0014                                                              |
| Lta4h              | leukotriene A4 hydrolase                                               | AK199829         | -0.219                                               | 0.0077                                                              |
| Mak                | male germ cell-associated kinase                                       | BC050009         | -0.280                                               | 0.0106                                                              |
| Mast2              | microtubule associated<br>serine/threonine kinase 2                    | NM_008641        | -0.202                                               | 0.0000                                                              |
| Mctp1              | NA                                                                     | AK054478         | -0.223                                               | 0.0062                                                              |
| Mmp16              | matrix metalloproteinase 16                                            | AK052039         | -0.239                                               | 0.0034                                                              |
| Mpp5               | membrane protein, palmitoylated 5<br>(MAGUK p55 subfamily member<br>5) | NM_019579        | -0.258                                               | 0.0000                                                              |
| Mre11a             | meiotic recombination 11 homolog<br>A ( <i>S. cerevisiae</i> )         | AK161013         | -0.213                                               | 0.0069                                                              |
| Mrpl39             | mitochondrial ribosomal protein<br>L39                                 | NM_017404        | -0.228                                               | 0.0003                                                              |
| Mrpl47             | mitochondrial ribosomal protein<br>L47                                 | XM_994072        | -0.282                                               | 0.0476                                                              |



**Table S6.** Continued.

**Downregulated genes (284):**

| <b>Gene Symbol</b> | <b>Gene Name</b>                                            | <b>Entrez ID</b> | <b>Fold Change<br/><i>Mecp2</i>-null over<br/>WT</b> | <b>FDR-adjusted<br/>p-value<br/>(<i>Mecp2</i>-null over<br/>WT)</b> |
|--------------------|-------------------------------------------------------------|------------------|------------------------------------------------------|---------------------------------------------------------------------|
| Mrpl52             | mitochondrial ribosomal protein L52                         | NM_026851        | -0.264                                               | 0.0354                                                              |
| Msl31              | male-specific lethal-3 homolog 1 (Drosophila)               | AK053927         | -0.202                                               | 0.0015                                                              |
| Mtif2              | mitochondrial translational initiation factor 2             | NM_133767        | -0.205                                               | 0.0071                                                              |
| N6amt2             | NA                                                          | NM_026526        | -0.248                                               | 0.0266                                                              |
| Nadk               | NAD kinase                                                  | AK186958         | -0.218                                               | 0.0014                                                              |
| Narg1              | NMDA receptor-regulated gene 1                              | AK172501         | -0.200                                               | 0.0012                                                              |
| Narg2              | NMDA receptor-regulated gene 2                              | NM_145618        | -0.262                                               | 0.0094                                                              |
| Ncoa7              | nuclear receptor coactivator 7                              | BC080670         | -0.256                                               | 0.0000                                                              |
| Ndst4              | N-deacetylase/N-sulfotransferase (heparin glucosaminy) 4    | AK132938         | -0.236                                               | 0.0131                                                              |
| Ndufa1             | NADH dehydrogenase (ubiquinone) 1 alpha subcomplex, 1       | NM_019443        | -0.278                                               | 0.0414                                                              |
| Nek1               | NIMA (never in mitosis gene a)-related expressed kinase 1   | XM_973975        | -0.233                                               | 0.0000                                                              |
| Nek3               | NIMA (never in mitosis gene a)-related expressed kinase 3   | NM_011848        | -0.238                                               | 0.0080                                                              |
| Nit2               | nitrilase family, member 2                                  | NM_023175        | -0.266                                               | 0.0094                                                              |
| Nol8               | nucleolar protein 8                                         | BC026402         | -0.222                                               | 0.0002                                                              |
| Npat               | nuclear protein in the AT region                            | XM_917387        | -0.263                                               | 0.0001                                                              |
| Npl                | N-acetylneuraminate pyruvate lyase                          | NM_028749        | -0.254                                               | 0.0357                                                              |
| Npsr1              | NA                                                          | NM_175678        | -0.471                                               | 0.0000                                                              |
| Nrd1               | nardilysin, N-arginine dibasic convertase, NRD convertase 1 | AK040377         | -0.236                                               | 0.0000                                                              |
| Nsdhl              | NAD(P) dependent steroid dehydrogenase-like                 | NM_010941        | -0.228                                               | 0.0003                                                              |
| Nucb2              | nucleobindin 2                                              | NM_016773        | -0.308                                               | 0.0000                                                              |
| Odz1               | odd Oz/ten-m homolog 1 (Drosophila)                         | AK034286         | -0.226                                               | 0.0000                                                              |
| Olfrl1116          | NA                                                          | NM_207632        | -0.525                                               | 0.0154                                                              |
| Otof               | otofelin                                                    | NM_031875        | -0.332                                               | 0.0000                                                              |
| P2rx5              | purinergic receptor P2X, ligand-gated ion channel, 5        | NM_033321        | -0.234                                               | 0.0449                                                              |
| Pb1                | NA                                                          | BC055456         | -0.202                                               | 0.0000                                                              |
| Pdia3              | protein disulfide isomerase associated 3                    | NM_007952        | -0.213                                               | 0.0016                                                              |
| Pfkfb3             | 6-phosphofructo-2-kinase/fructose-2,6-biphosphatase3        | NM_133232        | -0.209                                               | 0.0000                                                              |

**Table S6.** Continued.

**Downregulated genes (284):**

| <b>Gene Symbol</b> | <b>Gene Name</b>                                                                   | <b>Entrez ID</b> | <b>Fold Change<br/><i>Mecp2</i>-null over<br/>WT</b> | <b>FDR-adjusted<br/>p-value<br/>(<i>Mecp2</i>-null over<br/>WT)</b> |
|--------------------|------------------------------------------------------------------------------------|------------------|------------------------------------------------------|---------------------------------------------------------------------|
| Phf10              | PHD finger protein 10                                                              | NM_024250        | -0.265                                               | 0.0009                                                              |
| Phkb               | phosphorylase kinase beta                                                          | AK089493         | -0.214                                               | 0.0000                                                              |
| Pkn2               | protein kinase N2                                                                  | AK083425         | -0.215                                               | 0.0000                                                              |
| Pls3               | plastin 3 (T-isoform)                                                              | NM_145629        | -0.238                                               | 0.0000                                                              |
| Pnpla7             | NA                                                                                 | AK148380         | -0.227                                               | 0.0000                                                              |
| Pnpt1              | polyribonucleotide<br>nucleotidyltransferase 1                                     | XM_975791        | -0.228                                               | 0.0001                                                              |
| Ppig               | peptidyl-prolyl isomerase G<br>(cyclophilin G)                                     | AK163324         | -0.208                                               | 0.0076                                                              |
| Ppm1m              | protein phosphatase 1M                                                             | AK046387         | -0.208                                               | 0.0019                                                              |
| Pqbp1              | polyglutamine binding protein 1                                                    | NM_019478        | -0.226                                               | 0.0232                                                              |
| Prdx3              | peroxiredoxin 3                                                                    | NM_007452        | -0.222                                               | 0.0002                                                              |
| Prkra              | protein kinase, interferon inducible<br>double stranded RNA dependent<br>activator | NM_011871        | -0.238                                               | 0.0180                                                              |
| Prpf39             | PRP39 pre-mRNA processing<br>factor 39 homolog (yeast)                             | BC033575         | -0.207                                               | 0.0033                                                              |
| Psip1              | PC4 and SFRS1 interacting protein<br>1                                             | NM_133948        | -0.227                                               | 0.0001                                                              |
| Ptpn9              | protein tyrosine phosphatase, non-<br>receptor type 9                              | NM_019651        | -0.209                                               | 0.0001                                                              |
| Pycr1              | pyrroline-5-carboxylate reductase1                                                 | NM_144795        | -0.238                                               | 0.0315                                                              |
| Qdpr               | quininoid dihydropteridine<br>reductase                                            | NM_024236        | -0.213                                               | 0.0000                                                              |
| Raph1              | Ras association (RalGDS/AF-6)<br>and pleckstrin homology domains1                  | NM_001045513     | -0.235                                               | 0.0025                                                              |
| Rassf4             | Ras association (RalGDS/AF-6)<br>domain family 4                                   | AK160584         | -0.221                                               | 0.0199                                                              |
| Rbbp8              | retinoblastoma binding protein 8                                                   | AK163908         | -0.265                                               | 0.0023                                                              |
| Rec8L1             | REC8-like 1 (yeast)                                                                | NM_020002        | -0.222                                               | 0.0006                                                              |
| Ret                | ret proto-oncogene                                                                 | BC059012         | -0.277                                               | 0.0000                                                              |
| Rgs2               | regulator of G-protein signaling 2                                                 | NM_009061        | -0.304                                               | 0.0058                                                              |
| Ric3               | resistance to inhibitors of<br>cholinesterase 3 homolog (C.<br>elegans)            | NM_001038624     | -0.242                                               | 0.0118                                                              |
| Rif1               | Rap1 interacting factor 1 homolog<br>(yeast)                                       | XR_003484        | -0.255                                               | 0.0000                                                              |
| Rnf20              | ring finger protein 20                                                             | NM_182999        | -0.225                                               | 0.0000                                                              |
| Rock1              | Rho-associated coiled-coil forming<br>kinase 1                                     | BC066873         | -0.269                                               | 0.0000                                                              |
| Rpgr               | retinitis pigmentosa GTPase<br>regulator                                           | AK029864         | -0.213                                               | 0.0020                                                              |

**Table S6.** Continued.

**Downregulated genes (284):**

| <b>Gene Symbol</b> | <b>Gene Name</b>                                                                                    | <b>Entrez ID</b> | <b>Fold Change<br/><i>Mecp2</i>-null over<br/>WT</b> | <b>FDR-adjusted<br/>p-value<br/>(<i>Mecp2</i>-null over<br/>WT)</b> |
|--------------------|-----------------------------------------------------------------------------------------------------|------------------|------------------------------------------------------|---------------------------------------------------------------------|
| Rpgrip1            | retinitis pigmentosa GTPase<br>regulator interacting protein 1                                      | AK015701         | -0.285                                               | 0.0000                                                              |
| Rpp30              | ribonuclease P/MRP 30 subunit<br>(human)                                                            | AK004137         | -0.337                                               | 0.0229                                                              |
| Rrp12              | NA                                                                                                  | NM_199447        | -0.209                                               | 0.0000                                                              |
| Rxfp1              | NA                                                                                                  | AK137655         | -0.257                                               | 0.0308                                                              |
| S100pbb            | NA                                                                                                  | AK043160         | -0.237                                               | 0.0041                                                              |
| Scg3               | secretogranin III                                                                                   | NM_009130        | -0.274                                               | 0.0000                                                              |
| Sclt1              | NA                                                                                                  | XM_982400        | -0.239                                               | 0.0011                                                              |
| Scn3a              | sodium channel, voltage-gated,<br>type III, alpha                                                   | XM_001001591     | -0.293                                               | 0.0000                                                              |
| Sec61a2            | Sec61, alpha subunit 2 (S.<br><i>cerevisiae</i> )                                                   | BC005458         | -0.207                                               | 0.0000                                                              |
| Sgk                | serum/glucocorticoid regulated<br>kinase                                                            | BC070401         | -0.306                                               | 0.0006                                                              |
| Sgk2               | serum/glucocorticoid regulated<br>kinase 2                                                          | AK050009         | -0.257                                               | 0.0426                                                              |
| Slc25a31           | solute carrier family 25<br>mitochondrial carrier, adenine<br>nucleotide translocator, member31     | NM_178386        | -0.229                                               | 0.0313                                                              |
| Slc39a4            | solute carrier family 39 (zinc<br>transporter), member 4                                            | NM_028064        | -0.268                                               | 0.0234                                                              |
| Slc40a1            | solute carrier family 40 (iron-<br>regulated transporter), member 1                                 | NM_016917        | -0.316                                               | 0.0007                                                              |
| Slc9a9             | solute carrier family 9<br>(sodium/hydrogen exchanger),<br>isoform 9                                | NM_177909        | -0.260                                               | 0.0004                                                              |
| Slco1a4            | solute carrier organic anion<br>transporter family, member 1a4                                      | NM_030687        | -0.308                                               | 0.0001                                                              |
| Slco4c1            | solute carrier organic anion<br>transporter family, member 4C1                                      | NM_172658        | -0.353                                               | 0.0372                                                              |
| Smarcal1           | Swi/SNF related matrix associated,<br>actin dependent regulator of<br>chromatin, subfamily a-like 1 | NM_018817        | -0.201                                               | 0.0000                                                              |
| Smc6               | NA                                                                                                  | BC048790         | -0.267                                               | 0.0000                                                              |
| Sncg               | synuclein, gamma                                                                                    | NM_011430        | -0.424                                               | 0.0046                                                              |
| Snx14              | sorting nexin 14                                                                                    | AK213239         | -0.230                                               | 0.0000                                                              |
| Spag1              | sperm associated antigen 1                                                                          | AK032601         | -0.203                                               | 0.0112                                                              |
| Spag4              | sperm associated antigen 4                                                                          | AK220494         | -0.228                                               | 0.0192                                                              |
| St18               | suppression of tumorigenicity 18                                                                    | AK147664         | -0.217                                               | 0.0177                                                              |
| St6gal2            | beta galactoside alpha 2,6<br>sialyltransferase 2                                                   | AK129462         | -0.266                                               | 0.0097                                                              |

**Table S6.** Continued.

**Downregulated genes (284):**

| <b>Gene Symbol</b> | <b>Gene Name</b>                                                          | <b>Entrez ID</b> | <b>Fold Change<br/><i>Mecp2</i>-null over<br/>WT</b> | <b>FDR-adjusted<br/>p-value<br/>(<i>Mecp2</i>-null over<br/>WT)</b> |
|--------------------|---------------------------------------------------------------------------|------------------|------------------------------------------------------|---------------------------------------------------------------------|
| Stk17b             | serine/threonine kinase 17b<br>(apoptosis-inducing)                       | NM_133810        | -0.262                                               | 0.0232                                                              |
| Stmn2              | stathmin-like 2                                                           | NM_025285        | -0.244                                               | 0.0004                                                              |
| Supt16h            | suppressor of Ty 16 homolog (S.<br>cerevisiae)                            | NM_033618        | -0.227                                               | 0.0000                                                              |
| Susd2              | sushi domain containing 2                                                 | BC066833         | -0.201                                               | 0.0010                                                              |
| Syt12              | synaptotagmin-like 2                                                      | NM_001040087     | -0.264                                               | 0.0002                                                              |
| Tbc1d19            | TBC1 domain family, member 19                                             | AK177065         | -0.228                                               | 0.0000                                                              |
| Tbc1d8b            | NA                                                                        | XM_907570        | -0.282                                               | 0.0073                                                              |
| Tdrkh              | tudor and KH domain containing<br>protein                                 | BC057030         | -0.200                                               | 0.0018                                                              |
| Tek                | endothelial-specific receptor<br>tyrosine kinase                          | NM_013690        | -0.213                                               | 0.0001                                                              |
| Terf1              | telomeric repeat binding factor 1                                         | AK036615         | -0.224                                               | 0.0058                                                              |
| Thns12             | NA                                                                        | NM_178413        | -0.217                                               | 0.0317                                                              |
| Thoc1              | THO complex 1                                                             | AK042548         | -0.255                                               | 0.0008                                                              |
| Thoc2              | THO complex 2                                                             | XM_359343        | -0.231                                               | 0.0000                                                              |
| Tmem100            | NA                                                                        | NM_026433        | -0.484                                               | 0.0298                                                              |
| Tmem77             | NA                                                                        | NM_026013        | -0.272                                               | 0.0002                                                              |
| Tmem87a            | NA                                                                        | NM_147153        | -0.221                                               | 0.0029                                                              |
| Tmem98             | NA                                                                        | AK148132         | -0.245                                               | 0.0288                                                              |
| Tomm7              | translocase of outer mitochondrial<br>membrane 7 homolog (yeast)          | NM_025394        | -0.240                                               | 0.0133                                                              |
| Tpx2               | TPX2, microtubule-associated<br>protein homolog ( <i>Xenopus laevis</i> ) | NM_028109        | -0.222                                               | 0.0351                                                              |
| Trim62             | tripartite motif-containing 62                                            | NM_178110        | -0.272                                               | 0.0011                                                              |
| Tro                | trophinin                                                                 | NM_001002272     | -0.220                                               | 0.0010                                                              |
| Trpm6              | transient receptor potential cation<br>channel, subfamily M, member 6     | XM_987699        | -0.325                                               | 0.0000                                                              |
| Ttc12              | tetratricopeptide repeat domain 12                                        | NM_172770        | -0.240                                               | 0.0156                                                              |
| Ttc16              | tetratricopeptide repeat domain 16                                        | AK089384         | -0.215                                               | 0.0203                                                              |
| Ube112             | NA                                                                        | NM_010323        | -0.332                                               | 0.0000                                                              |
| Ube2j2             | ubiquitin-conjugating enzyme E2,<br>J2 homolog (yeast)                    | NR_002889        | -0.305                                               | 0.0136                                                              |
| Ube2r2             | ubiquitin-conjugating enzyme E2R<br>2                                     | XM_001002125     | -0.228                                               | 0.0037                                                              |
| Ubn1               | ubinnuclein 1                                                             | NM_026666        | -0.227                                               | 0.0082                                                              |
| Usp1               | ubiquitin specific peptdiase 1                                            | XR_002561        | -0.358                                               | 0.0110                                                              |
| Vit                | vitrin                                                                    | NM_028813        | -0.291                                               | 0.0081                                                              |
| Wbp4               | WW domain binding protein 4                                               | NM_018765        | -0.266                                               | 0.0003                                                              |

**Table S6.** Continued.

**Downregulated genes (284):**

| <b>Gene Symbol</b> | <b>Gene Name</b>                                                             | <b>Entrez ID</b> | <b>Fold Change<br/><i>Mecp2</i>-null over<br/>WT</b> | <b>FDR-adjusted<br/>p-value<br/>(<i>Mecp2</i>-null over<br/>WT)</b> |
|--------------------|------------------------------------------------------------------------------|------------------|------------------------------------------------------|---------------------------------------------------------------------|
| Wdr31              | WD repeat domain 31                                                          | NM_023597        | -0.238                                               | 0.0271                                                              |
| Wif1               | Wnt inhibitory factor 1                                                      | NM_011915        | -0.296                                               | 0.0038                                                              |
| Wwp1               | WW domain containing E3<br>ubiquitin protein ligase 1                        | NM_177327        | -0.276                                               | 0.0043                                                              |
| Xdh                | xanthine dehydrogenase                                                       | AK164764         | -0.211                                               | 0.0061                                                              |
| Xrcc5              | X-ray repair complementing<br>defective repair in Chinese<br>hamster cells 5 | NM_009533        | -0.316                                               | 0.0000                                                              |
| Xrcc6              | X-ray repair complementing<br>defective repair in Chinese<br>hamster cells 6 | NM_010247        | -0.227                                               | 0.0036                                                              |
| Yipf4              | Yip1 domain family, member 4                                                 | AK086213         | -0.204                                               | 0.0053                                                              |
| Zfp108             | zinc finger protein 108                                                      | NM_018791        | -0.237                                               | 0.0335                                                              |
| Zfp28              | zinc finger protein 28                                                       | NM_175247        | -0.235                                               | 0.0432                                                              |
| Zfp291             | zinc finger protein 291                                                      | XM_620753        | -0.237                                               | 0.0000                                                              |
| Zfp426             | zinc finger protein 426                                                      | AK036912         | -0.258                                               | 0.0015                                                              |
| Zfp694             | NA                                                                           | XM_982941        | -0.217                                               | 0.0256                                                              |
| Zranb3             | zinc finger, RAN-binding domain<br>containing 3                              | BC117922         | -0.236                                               | 0.0014                                                              |
| Zw10               | ZW10 homolog ( <i>Drosophila</i> ),<br>centromere/kinetochore protein        | BC067405         | -0.209                                               | 0.0016                                                              |

**Table S7.** Expression of 66 genes was confirmed by quantitative real-time RT-PCR ( $p < 0.05$ ). Fold change values from the microarray experiment are also included.

| <i>MECP2-Tg</i> |                     |         | <i>Mecp2-null</i> |                     |         | Fold change values observed in the microarray experiment |                                    |
|-----------------|---------------------|---------|-------------------|---------------------|---------|----------------------------------------------------------|------------------------------------|
| Gene            | Fold Change over WT | p-value | Gene              | Fold Change over WT | p-value | Fold Change <i>MECP2-Tg</i> / WT                         | Fold Change <i>Mecp2-null</i> / WT |
| Gpr165          | 7.35                | 0.0000  | Gpr165            | -3.55               | 0.0000  | 0.211                                                    | -0.539                             |
| Npbwr1          | 4.61                | 0.0100  | Npbwr1            | -3.11               | 0.0000  | 0.939                                                    | -0.565                             |
| Agrp            | 3.76                | 0.0006  | Agrp              | -1.40               | 0.0076  | 0.866                                                    | -0.289                             |
| Trrap           | 3.47                | 0.0084  | Trrap             | -1.62               | 0.0002  | 0.110                                                    | -0.024                             |
| AW551984        | 3.29                | 0.0029  | AW551984          | -2.39               | 0.0000  | 0.726                                                    | -0.976                             |
| Htr1a           | 3.21                | 0.0065  | Htr1a             | -2.55               | 0.0000  | 0.753                                                    | -0.598                             |
| Crh             | 3.21                | 0.0001  | Crh               | -2.06               | 0.0002  | 1.020                                                    | -0.521                             |
| Gpr56           | 3.16                | 0.0005  | Gpr56             | -1.33               | 0.0218  | 0.459                                                    | -0.235                             |
| Pgr151          | 2.83                | 0.0280  | Pgr151            | -3.35               | 0.0000  | 0.815                                                    | -0.638                             |
| Gpr17           | 2.71                | 0.0029  | Gpr17             | -1.51               | 0.0012  | 0.591                                                    | -0.166                             |
| Hcrtr1          | 2.70                | 0.0000  | Hcrtr1            | -3.07               | 0.0000  | 0.694                                                    | -0.918                             |
| Gpr153          | 2.60                | 0.0127  | Gpr153            | -1.74               | 0.0000  | 0.499                                                    | -0.354                             |
| Gprin1          | 2.59                | 0.0009  | Gprin1            | -1.45               | 0.0010  | 0.533                                                    | -0.063                             |
| Htr2a           | 2.53                | 0.0209  | Htr2a             | -1.44               | 0.0001  | 0.326                                                    | -0.236                             |
| Oprk1           | 2.51                | 0.0000  | Oprk1             | -2.46               | 0.0000  | 0.884                                                    | -0.903                             |
| C1ql4           | 2.51                | 0.0010  | C1ql4             | -1.65               | 0.0010  | 0.644                                                    | -0.442                             |
| Nts             | 2.45                | 0.0439  | Nts               | -1.83               | 0.0001  | 0.990                                                    | -0.677                             |
| Creb1           | 2.39                | 0.0055  | Creb1             | -1.90               | 0.0000  | 0.262                                                    | -0.180                             |
| Oxtr            | 2.38                | 0.0014  | Oxtr              | -1.37               | 0.0072  | 0.257                                                    | -0.111                             |
| Ldoc1           | 2.36                | 0.0000  | Ldoc1             | -4.21               | 0.0000  | 1.025                                                    | -1.156                             |
| Gabrq           | 2.35                | 0.0152  | Gabrq             | -1.34               | 0.0110  | 0.283                                                    | -0.229                             |
| Nisch           | 2.26                | 0.0336  | Nisch             | -1.84               | 0.0001  | 0.120                                                    | -0.065                             |
| Gprk5           | 2.22                | 0.0413  | Gprk5             | -1.37               | 0.0008  | 0.515                                                    | -0.417                             |
| Gabra3          | 2.18                | 0.0203  | Gabra3            | -1.42               | 0.0006  | 0.318                                                    | -0.357                             |
| Gamt            | 2.13                | 0.0261  | Gamt              | -1.71               | 0.0000  | 0.867                                                    | -0.493                             |
| Gps1            | 2.11                | 0.0270  | Gps1              | -1.24               | 0.0083  | 0.275                                                    | -0.066                             |
| Adcyap1         | 2.10                | 0.0000  | Adcyap1           | -1.95               | 0.0001  | 0.875                                                    | -0.724                             |
| Gad2            | 2.07                | 0.0400  | Gad2              | -1.59               | 0.0147  | 0.181                                                    | -0.507                             |
| Htr1d           | 1.94                | 0.0145  | Htr1d             | -1.23               | 0.0280  | 0.252                                                    | -0.277                             |
| Sst             | 1.86                | 0.0000  | Sst               | -1.66               | 0.0001  | 0.668                                                    | -0.501                             |
| Fabp7           | 1.79                | 0.0000  | Fabp7             | -1.46               | 0.0011  | 1.112                                                    | -0.529                             |
| Gpr126          | 1.65                | 0.0435  | Gpr126            | -1.21               | 0.0359  | 0.203                                                    | -0.391                             |
| Hcrtr2          | 1.64                | 0.0010  | Hcrtr2            | -1.51               | 0.0003  | 0.424                                                    | -0.471                             |

Table S7. Continued.

| <i>MECP2-Tg</i> |                     |         | <i>Mecp2-null</i> |                     |         | Fold change values observed in the microarray experiment |                                    |
|-----------------|---------------------|---------|-------------------|---------------------|---------|----------------------------------------------------------|------------------------------------|
| Gene            | Fold Change over WT | p-value | Gene              | Fold Change over WT | p-value | Fold Change <i>MECP2-Tg</i> / WT                         | Fold Change <i>Mecp2-null</i> / WT |
| Rhbdl3          | 1.63                | 0.0001  | Rhbdl3            | -1.57               | 0.0012  | 0.564                                                    | -0.388                             |
| Fxyd7           | 1.63                | 0.0009  | Fxyd7             | -1.96               | 0.0000  | 1.071                                                    | -0.798                             |
| Npy             | 1.58                | 0.0017  | Npy               | -1.23               | 0.0343  | 0.576                                                    | -0.184                             |
| Arhgdig         | 1.47                | 0.0009  | Arhgdig           | -1.95               | 0.0000  | 0.636                                                    | -0.546                             |
| Snx26           | 1.46                | 0.0238  | Snx26             | -1.69               | 0.0056  | 0.547                                                    | -0.376                             |
| Brunol6         | 1.45                | 0.0000  | Brunol6           | -1.29               | 0.0025  | 0.496                                                    | -0.286                             |
| E2f1            | 1.44                | 0.0002  | E2f1              | -1.55               | 0.0001  | 0.162                                                    | -0.373                             |
| Npas1           | 1.42                | 0.0063  | Npas1             | -1.61               | 0.0001  | 0.473                                                    | -0.417                             |
| Arg2            | 1.41                | 0.0160  | Arg2              | -1.31               | 0.0033  | 0.622                                                    | -0.339                             |
| Bdnf            | 1.39                | 0.0392  | Bdnf              | -1.83               | 0.0000  | 0.771                                                    | -0.491                             |
| Ar              | 1.36                | 0.0004  | Ar                | -1.43               | 0.0010  | 0.208                                                    | -0.249                             |
| Hes5            | 1.34                | 0.0489  | Hes5              | -1.89               | 0.0001  | 0.308                                                    | -0.333                             |
| Taf6l           | 1.29                | 0.0024  | Taf6l             | -1.30               | 0.0024  | 0.572                                                    | -0.235                             |
| Ppargc1a        | -1.19               | 0.0402  | Ppargc1a          | 1.40                | 0.0000  | -0.401                                                   | 0.163                              |
| A2bp1           | -1.25               | 0.0052  | A2bp1             | 1.24                | 0.0004  | -0.225                                                   | 0.289                              |
| Pou6f2          | -1.29               | 0.0092  | Pou6f2            | 1.40                | 0.0000  | -0.375                                                   | 0.337                              |
| Satb1           | -1.29               | 0.0004  | Satb1             | 1.29                | 0.0000  | -0.375                                                   | 0.270                              |
| Prox1           | -1.34               | 0.0118  | Prox1             | 1.28                | 0.0006  | -0.280                                                   | 0.142                              |
| Crim1           | -1.34               | 0.0010  | Crim1             | 1.58                | 0.0001  | -0.225                                                   | 0.272                              |
| Kcnh1           | -1.35               | 0.0007  | Kcnh1             | 1.29                | 0.0132  | -0.381                                                   | 0.344                              |
| Tspan5          | -1.42               | 0.0006  | Tspan5            | 1.37                | 0.0000  | -0.309                                                   | 0.295                              |
| Chst8           | -1.46               | 0.0000  | Chst8             | 1.48                | 0.0065  | -0.290                                                   | 0.220                              |
| Rasgef1b        | -1.48               | 0.0000  | Rasgef1b          | 1.37                | 0.0000  | -0.367                                                   | 0.338                              |
| Pde7b           | -1.50               | 0.0000  | Pde7b             | 1.28                | 0.0001  | -0.358                                                   | 0.292                              |
| Odz3            | -1.50               | 0.0001  | Odz3              | 1.47                | 0.0002  | -0.599                                                   | 0.372                              |
| Sema5a          | -1.52               | 0.0005  | Sema5a            | 1.49                | 0.0051  | -0.401                                                   | 0.468                              |
| Il1rap          | -1.54               | 0.0001  | Il1rap            | 1.20                | 0.0056  | -0.464                                                   | 0.221                              |
| Tiam1           | -1.74               | 0.0000  | Tiam1             | 1.50                | 0.0108  | -0.425                                                   | 0.288                              |
| Grin2a          | -1.88               | 0.0000  | Grin2a            | 1.47                | 0.0000  | -0.469                                                   | 0.581                              |
| Mef2c           | -1.90               | 0.0000  | Mef2c             | 1.68                | 0.0000  | -0.543                                                   | 0.433                              |
| C630007B19Rik   | -1.90               | 0.0000  | C630007B19Rik     | 1.26                | 0.0072  | -0.473                                                   | 0.564                              |
| Rreb1           | -2.22               | 0.0000  | Rreb1             | 1.81                | 0.0000  | -0.666                                                   | 0.685                              |
| Itpr1           | -2.35               | 0.0109  | Itpr1             | 1.48                | 0.0032  | -0.600                                                   | 0.429                              |

**Table S8.** MeCP2-interacting proteins identified by co-immunopurification from WT brain extracts, but not *MeCP2*-null brain extracts.

| <b>Protein</b>                              | <b>Accession number</b> |
|---------------------------------------------|-------------------------|
| Creb1                                       | NP_598589               |
| H2A histone family, member Y                | NP_036145               |
| Histone cluster 1, H2bb                     | NP_783595               |
| Lamin A isoform C2                          | NP_062263               |
| Lens epithelium-derived growth factor       | NP_598709               |
| Regulator of chromosome condensation 1      | NP_598639               |
| Synaptopodin isoform A                      | NP_796314               |
| Transcription factor A, mitochondrial       | NP_033386               |
| Transcriptional activator protein Pur-alpha | P42669                  |

### Supplementary References

- S1. M. J. Okoniewski, T. Yates, S. Dibben, C. J. Miller, *Genome Biol.* **8**, R79 (2007).
- S2. Y. Benjamini, Y. Hochberg, *J R Stat Soc. B* **57**, 289 (1995).
- S3. J. I. Young, H. Y. Zoghbi, *Am J Hum Genet.* **74**, 511 (2004).
- S4. L. K. Christenson, R. L. Stouffer, J. F. Strauss III, *J Biol Chem.* **276**, 27392 (2001).
- S5. S. K. Chakrabarti, J. C. James, R. G. Mirmira, *J Biol Chem.* **277**, 13286 (2002).
- S6. K. J. Livak, T. D. Schmittgen, *Methods* **25**, 402 (2001).
- S7. S. Y. Jung, A. Malovannaya, J. Wei, B. W. O'Malley, J. Qin, *Mol Endocrinol.* **19**, 2451 (2005).
